# Supplementary material for: Metagenomics reveals diet-specific specialization of bacterial communities in fungus gardens of grass- and dicot-cutter ants
Source: bioRxiv preprint, doi:10.1101/250993, version 3 (2019-08-13)
Supplement: Supplemental Table 2 [file 250993_file16.xlsx]

## Sheet: Non-normalized
KO	gene	Pantoea	Burkholderia	Enterobacter	Erwinia	Klebsiella	Pseudomonas	Serratia
K06147	ABC Transporters, Eukaryotic Type;ABCB (MDR/TAP) subfamily ABCB-BAC subgroup;ABCB-BAC; ATP-binding cassette, subfamily B, bacterial	17	158	0	0	1	352	6
K11004	ABC Transporters, Eukaryotic Type;ABCB (MDR/TAP) subfamily ABCB-BAC subgroup;hlyB, cyaB; ATP-binding cassette, subfamily B, bacterial HlyB/CyaB	80	5	0	0	0	79	0
K18895	ABC Transporters, Eukaryotic Type;ABCB (MDR/TAP) subfamily ABCB-BAC subgroup;iroC; ATP-binding cassette, subfamily B, salmochelin/enterobactin exporter	4	0	3	0	0	0	0
K18889	ABC Transporters, Eukaryotic Type;ABCB (MDR/TAP) subfamily ABCB-BAC subgroup;mdlA, smdA; ATP-binding cassette, subfamily B, multidrug efflux pump	361	0	27	19	5	1	4
K18890	ABC Transporters, Eukaryotic Type;ABCB (MDR/TAP) subfamily ABCB-BAC subgroup;mdlB, smdB; ATP-binding cassette, subfamily B, multidrug efflux pump	394	0	28	12	0	0	5
K11085	ABC Transporters, Eukaryotic Type;ABCB (MDR/TAP) subfamily ABCB-BAC subgroup;msbA; ATP-binding cassette, subfamily B, bacterial MsbA [EC:3.6.3.-]	427	28	21	17	2	139	3
K13409	ABC Transporters, Eukaryotic Type;ABCB (MDR/TAP) subfamily ABCB-BAC subgroup;raxB, cvaB; ATP-binding cassette, subfamily B, bacterial RaxB	202	22	22	20	14	1	34
K18893	ABC Transporters, Eukaryotic Type;ABCB (MDR/TAP) subfamily ABCB-BAC subgroup;vcaM; ATP-binding cassette, subfamily B, multidrug efflux pump	379	17	1	11	0	136	1
K06148	ABC Transporters, Eukaryotic Type;ABCC (CFTR/MRP) subfamily ABCC-BAC subgroup;ABCC-BAC; ATP-binding cassette, subfamily C, bacterial	0	0	0	0	0	26	0
K16012	ABC Transporters, Eukaryotic Type;ABCC (CFTR/MRP) subfamily ABCC-BAC subgroup;cydC; ATP-binding cassette, subfamily C, bacterial CydC	335	0	28	20	4	0	4
K16014	ABC Transporters, Eukaryotic Type;ABCC (CFTR/MRP) subfamily ABCC-BAC subgroup;cydCD; ATP-binding cassette, subfamily C, bacterial CydCD	2	13	0	0	0	0	0
K16013	ABC Transporters, Eukaryotic Type;ABCC (CFTR/MRP) subfamily ABCC-BAC subgroup;cydD; ATP-binding cassette, subfamily C, bacterial CydD	371	0	19	24	2	0	4
K16299	ABC Transporters, Eukaryotic Type;ABCC (CFTR/MRP) subfamily ABCC-BAC subgroup;eexD; ATP-binding cassette, subfamily C, bacterial EexD	0	0	0	0	0	108	0
K12536	ABC Transporters, Eukaryotic Type;ABCC (CFTR/MRP) subfamily ABCC-BAC subgroup;hasD, prtD, aprD; ATP-binding cassette, subfamily C, bacterial exporter for protease/lipase	0	2	2	2	0	3	18
K12541	ABC Transporters, Eukaryotic Type;ABCC (CFTR/MRP) subfamily ABCC-BAC subgroup;lapB; ATP-binding cassette, subfamily C, bacterial LapB	507	34	52	20	12	81	3
K05685	ABC Transporters, Eukaryotic Type;Other subfamilies Macrolide exporter;macB; macrolide transport system ATP-binding/permease protein [EC:3.6.3.-]	23	17	28	1	3	39	15
K02021	ABC Transporters, Eukaryotic Type;Other subfamilies Other ABC transporters;ABC.MR; putative ABC transport system ATP-binding protein	0	0	0	0	0	1	0
K02471	ABC Transporters, Eukaryotic Type;Other subfamilies Other ABC transporters;bacA; vitamin B12/bleomycin/antimicrobial peptide transport system ATP-binding/permease protein	40	25	5	0	0	147	6
K06160	ABC Transporters, Eukaryotic Type;Other subfamilies Other ABC transporters;pvdE; putative pyoverdin transport system ATP-binding/permease protein	5	40	0	0	0	26	1
K15738	ABC Transporters, Eukaryotic Type;Other subfamilies Other ABC transporters;uup; ABC transport system&#160	308	33	24	7	1	125	4
K06159	ABC Transporters, Eukaryotic Type;Other subfamilies Other ABC transporters;yojI; multidrug/microcin transport system ATP-binding/permease protein	340	0	25	16	1	40	4
K01990	ABC Transporters, Prokaryotic Type;ABC-2 type and other transporters ABC-2 type transporter [MD:M00254] [OT];ABC-2.A; ABC-2 type transport system ATP-binding protein	204	65	48	19	2	60	17
K01992	ABC Transporters, Prokaryotic Type;ABC-2 type and other transporters ABC-2 type transporter [MD:M00254] [OT];ABC-2.P; ABC-2 type transport system permease protein	208	55	57	13	8	62	31
K09689	ABC Transporters, Prokaryotic Type;ABC-2 type and other transporters Capsular polysaccharide transporter [MD:M00249] [OT];ABC-2.CPSE.A; capsular polysaccharide transport system ATP-binding protein [EC:3.6.3.38]	4	7	1	0	0	1	0
K09688	ABC Transporters, Prokaryotic Type;ABC-2 type and other transporters Capsular polysaccharide transporter [MD:M00249] [OT];ABC-2.CPSE.P; capsular polysaccharide transport system permease protein	6	9	0	0	0	1	0
K10107	ABC Transporters, Prokaryotic Type;ABC-2 type and other transporters Capsular polysaccharide transporter [MD:M00249] [OT];ABC-2.CPSE.P1; capsular polysaccharide transport system permease protein	7	8	0	0	0	0	0
K09812	ABC Transporters, Prokaryotic Type;ABC-2 type and other transporters Cell division transporter [MD:M00256] [OT];ftsE; cell division transport system ATP-binding protein	141	0	8	11	5	72	5
K09811	ABC Transporters, Prokaryotic Type;ABC-2 type and other transporters Cell division transporter [MD:M00256] [OT];ftsX; cell division transport system permease protein	203	0	16	12	0	97	4
K19340	ABC Transporters, Prokaryotic Type;ABC-2 type and other transporters Copper-processing transporter [MD:M00762] [OT];nosF; Cu-processing system ATP-binding protein	0	0	0	0	0	1	0
K02193	ABC Transporters, Prokaryotic Type;ABC-2 type and other transporters Heme transporter [MD:M00259] [OT];ccmA; heme exporter protein A [EC:3.6.3.41]	160	0	2	15	1	53	3
K02194	ABC Transporters, Prokaryotic Type;ABC-2 type and other transporters Heme transporter [MD:M00259] [OT];ccmB; heme exporter protein B	157	1	0	22	1	57	4
K02195	ABC Transporters, Prokaryotic Type;ABC-2 type and other transporters Heme transporter [MD:M00259] [OT];ccmC; heme exporter protein C	175	0	4	13	1	64	4
K02196	ABC Transporters, Prokaryotic Type;ABC-2 type and other transporters Heme transporter [MD:M00259] [OT];ccmD; heme exporter protein D	107	0	1	0	1	33	4
K09695	ABC Transporters, Prokaryotic Type;ABC-2 type and other transporters Lipooligosaccharide transporter [MD:M00252] [OT];nodI; lipooligosaccharide transport system ATP-binding protein	0	21	0	0	0	0	0
K09694	ABC Transporters, Prokaryotic Type;ABC-2 type and other transporters Lipooligosaccharide transporter [MD:M00252] [OT];nodJ; lipooligosaccharide transport system permease protein	0	16	0	0	0	0	0
K09691	ABC Transporters, Prokaryotic Type;ABC-2 type and other transporters Lipopolysaccharide transporter [MD:M00250] [OT];ABC-2.LPSE.A; lipopolysaccharide transport system ATP-binding protein	102	21	7	15	12	91	23
K09690	ABC Transporters, Prokaryotic Type;ABC-2 type and other transporters Lipopolysaccharide transporter [MD:M00250] [OT];ABC-2.LPSE.P; lipopolysaccharide transport system permease protein	86	20	3	28	7	70	9
K06861	ABC Transporters, Prokaryotic Type;ABC-2 type and other transporters Lipopolysaccharide transporter [MD:M00320];lptB; lipopolysaccharide export system ATP-binding protein [EC:3.6.3.-]	134	17	15	15	2	41	4
K07091	ABC Transporters, Prokaryotic Type;ABC-2 type and other transporters Lipopolysaccharide transporter [MD:M00320];lptF; lipopolysaccharide export system permease protein	264	14	15	21	1	68	9
K11720	ABC Transporters, Prokaryotic Type;ABC-2 type and other transporters Lipopolysaccharide transporter [MD:M00320];lptG; lipopolysaccharide export system permease protein	283	19	15	27	4	88	10
K09808	ABC Transporters, Prokaryotic Type;ABC-2 type and other transporters Lipoprotein-releasing transporter [MD:M00255] [OT];lolC_E; lipoprotein-releasing system permease protein	452	28	35	34	3	183	10
K09810	ABC Transporters, Prokaryotic Type;ABC-2 type and other transporters Lipoprotein-releasing transporter [MD:M00255] [OT];lolD; lipoprotein-releasing system ATP-binding protein [EC:3.6.3.-]	142	30	14	10	0	62	5
K09013	ABC Transporters, Prokaryotic Type;ABC-2 type and other transporters Orphan ABC ATPase;sufC; Fe-S cluster assembly ATP-binding protein	150	0	12	5	1	0	4
K02003	ABC Transporters, Prokaryotic Type;ABC-2 type and other transporters Putative ABC transporter [MD:M00258];ABC.CD.A; putative ABC transport system ATP-binding protein	160	27	21	14	2	205	5
K02004	ABC Transporters, Prokaryotic Type;ABC-2 type and other transporters Putative ABC transporter [MD:M00258];ABC.CD.P; putative ABC transport system permease protein	431	78	45	25	4	422	5
K09693	ABC Transporters, Prokaryotic Type;ABC-2 type and other transporters Teichoic acid transporter [MD:M00251];tagH; teichoic acid transport system ATP-binding protein [EC:3.6.3.40]	0	0	0	0	0	0	1
K16784	ABC Transporters, Prokaryotic Type;Metallic cation, iron-siderophore and vitamin B12 transporters Biotin transporter [MD:M00581] [OT];bioM; biotin transport system ATP-binding protein [EC:3.6.3.-]	0	0	0	3	0	0	0
K02007	ABC Transporters, Prokaryotic Type;Metallic cation, iron-siderophore and vitamin B12 transporters Cobalt transporter [MD:M00245] [OT];cbiM; cobalt/nickel transport system permease protein	0	0	3	0	0	0	0
K02009	ABC Transporters, Prokaryotic Type;Metallic cation, iron-siderophore and vitamin B12 transporters Cobalt transporter [MD:M00245] [OT];cbiN; cobalt/nickel transport protein	0	0	2	0	0	1	0
K02006	ABC Transporters, Prokaryotic Type;Metallic cation, iron-siderophore and vitamin B12 transporters Cobalt transporter [MD:M00245] [OT];cbiO; cobalt/nickel transport system ATP-binding protein	0	0	4	0	0	0	0
K02008	ABC Transporters, Prokaryotic Type;Metallic cation, iron-siderophore and vitamin B12 transporters Cobalt transporter [MD:M00245] [OT];cbiQ; cobalt/nickel transport system permease protein	0	0	6	0	0	0	0
K02013	ABC Transporters, Prokaryotic Type;Metallic cation, iron-siderophore and vitamin B12 transporters Iron complex transporter [MD:M00240];ABC.FEV.A; iron complex transport system ATP-binding protein [EC:3.6.3.34]	860	81	72	39	23	283	29
K02015	ABC Transporters, Prokaryotic Type;Metallic cation, iron-siderophore and vitamin B12 transporters Iron complex transporter [MD:M00240];ABC.FEV.P; iron complex transport system permease protein	1517	92	124	43	42	522	32
K02016	ABC Transporters, Prokaryotic Type;Metallic cation, iron-siderophore and vitamin B12 transporters Iron complex transporter [MD:M00240];ABC.FEV.S; iron complex transport system substrate-binding protein	1496	65	108	104	20	294	38
K11604	ABC Transporters, Prokaryotic Type;Metallic cation, iron-siderophore and vitamin B12 transporters Manganese/iron transporter [MD:M00317] [OT];sitA; manganese/iron transport system substrate-binding protein	158	0	4	1	0	58	5
K11607	ABC Transporters, Prokaryotic Type;Metallic cation, iron-siderophore and vitamin B12 transporters Manganese/iron transporter [MD:M00317] [OT];sitB; manganese/iron transport system ATP-binding protein	140	0	5	1	0	53	4
K11605	ABC Transporters, Prokaryotic Type;Metallic cation, iron-siderophore and vitamin B12 transporters Manganese/iron transporter [MD:M00317] [OT];sitC; manganese/iron transport system permease protein	149	0	6	0	0	61	3
K11606	ABC Transporters, Prokaryotic Type;Metallic cation, iron-siderophore and vitamin B12 transporters Manganese/iron transporter [MD:M00317] [OT];sitD; manganese/iron transport system permease protein	122	0	6	0	0	66	3
K02007	ABC Transporters, Prokaryotic Type;Metallic cation, iron-siderophore and vitamin B12 transporters Nickel transporter [MD:M00246] [OT];cbiM; cobalt/nickel transport system permease protein	0	0	3	0	0	0	0
K02009	ABC Transporters, Prokaryotic Type;Metallic cation, iron-siderophore and vitamin B12 transporters Nickel transporter [MD:M00246] [OT];cbiN; cobalt/nickel transport protein	0	0	2	0	0	1	0
K02006	ABC Transporters, Prokaryotic Type;Metallic cation, iron-siderophore and vitamin B12 transporters Nickel transporter [MD:M00246] [OT];cbiO; cobalt/nickel transport system ATP-binding protein	0	0	4	0	0	0	0
K02008	ABC Transporters, Prokaryotic Type;Metallic cation, iron-siderophore and vitamin B12 transporters Nickel transporter [MD:M00246] [OT];cbiQ; cobalt/nickel transport system permease protein	0	0	6	0	0	0	0
K05833	ABC Transporters, Prokaryotic Type;Metallic cation, iron-siderophore and vitamin B12 transporters Putative ABC transporter [MD:M00247] [OT];ABC.X4.A; putative ABC transport system ATP-binding protein	0	15	0	0	0	0	0
K05832	ABC Transporters, Prokaryotic Type;Metallic cation, iron-siderophore and vitamin B12 transporters Putative ABC transporter [MD:M00247] [OT];ABC.X4.P; putative ABC transport system permease protein	0	9	0	0	0	0	0
K01989	ABC Transporters, Prokaryotic Type;Metallic cation, iron-siderophore and vitamin B12 transporters Putative ABC transporter [MD:M00247] [OT];ABC.X4.S; putative ABC transport system substrate-binding protein	0	14	0	0	0	0	0
K02074	ABC Transporters, Prokaryotic Type;Metallic cation, iron-siderophore and vitamin B12 transporters Putative zinc/manganese transporter [MD:M00244];ABC.ZM.A; zinc/manganese transport system ATP-binding protein	160	26	11	13	6	60	3
K02075	ABC Transporters, Prokaryotic Type;Metallic cation, iron-siderophore and vitamin B12 transporters Putative zinc/manganese transporter [MD:M00244];ABC.ZM.P; zinc/manganese transport system permease protein	191	17	13	19	4	57	7
K02077	ABC Transporters, Prokaryotic Type;Metallic cation, iron-siderophore and vitamin B12 transporters Putative zinc/manganese transporter [MD:M00244];ABC.ZM.S; zinc/manganese transport system substrate-binding protein	220	31	21	11	0	69	5
K06074	ABC Transporters, Prokaryotic Type;Metallic cation, iron-siderophore and vitamin B12 transporters Vitamin B12 transporter [MD:M00241] [OT];ABC.VB12.A, btuD; vitamin B12 transport system ATP-binding protein [EC:3.6.3.33]	190	0	13	10	1	0	4
K06073	ABC Transporters, Prokaryotic Type;Metallic cation, iron-siderophore and vitamin B12 transporters Vitamin B12 transporter [MD:M00241] [OT];ABC.VB12.P, btuC; vitamin B12 transport system permease protein	194	0	11	10	3	0	5
K06858	ABC Transporters, Prokaryotic Type;Metallic cation, iron-siderophore and vitamin B12 transporters Vitamin B12 transporter [MD:M00241] [OT];ABC.VB12.S1, btuF; vitamin B12 transport system substrate-binding protein	187	0	10	12	1	9	4
K09815	ABC Transporters, Prokaryotic Type;Metallic cation, iron-siderophore and vitamin B12 transporters Zinc transporter [MD:M00242] [OT];znuA; zinc transport system substrate-binding protein	182	0	13	12	6	76	3
K09816	ABC Transporters, Prokaryotic Type;Metallic cation, iron-siderophore and vitamin B12 transporters Zinc transporter [MD:M00242] [OT];znuB; zinc transport system permease protein	199	0	11	16	0	73	4
K09817	ABC Transporters, Prokaryotic Type;Metallic cation, iron-siderophore and vitamin B12 transporters Zinc transporter [MD:M00242] [OT];znuC; zinc transport system ATP-binding protein [EC:3.6.3.-]	157	0	15	10	0	72	3
K11081	ABC Transporters, Prokaryotic Type;Mineral and organic ion transporters 2-Aminoethylphosphonate transporter [MD:M00302] [OT];phnS; 2-aminoethylphosphonate transport system substrate-binding protein	0	8	0	0	0	0	4
K11084	ABC Transporters, Prokaryotic Type;Mineral and organic ion transporters 2-Aminoethylphosphonate transporter [MD:M00302] [OT];phnT; 2-aminoethylphosphonate transport system ATP-binding protein	0	14	0	0	0	0	6
K11083	ABC Transporters, Prokaryotic Type;Mineral and organic ion transporters 2-Aminoethylphosphonate transporter [MD:M00302] [OT];phnU; 2-aminoethylphosphonate transport system permease protein	0	17	0	0	0	0	3
K11082	ABC Transporters, Prokaryotic Type;Mineral and organic ion transporters 2-Aminoethylphosphonate transporter [MD:M00302] [OT];phnV; 2-aminoethylphosphonate transport system permease protein	0	19	1	0	1	0	3
K02000	ABC Transporters, Prokaryotic Type;Mineral and organic ion transporters Glycine betaine/proline transporter [MD:M00208] [OT];proV; glycine betaine/proline transport system ATP-binding protein [EC:3.6.3.32]	48	37	16	16	0	223	4
K02001	ABC Transporters, Prokaryotic Type;Mineral and organic ion transporters Glycine betaine/proline transporter [MD:M00208] [OT];proW; glycine betaine/proline transport system permease protein	47	40	23	14	1	183	3
K02002	ABC Transporters, Prokaryotic Type;Mineral and organic ion transporters Glycine betaine/proline transporter [MD:M00208] [OT];proX; glycine betaine/proline transport system substrate-binding protein	49	117	18	13	3	625	3
K02012	ABC Transporters, Prokaryotic Type;Mineral and organic ion transporters Iron(III) transporter [MD:M00190] [OT];afuA, fbpA; iron(III) transport system substrate-binding protein	256	55	36	5	10	39	10
K02011	ABC Transporters, Prokaryotic Type;Mineral and organic ion transporters Iron(III) transporter [MD:M00190] [OT];afuB, fbpB; iron(III) transport system permease protein	424	78	50	5	12	57	15
K02010	ABC Transporters, Prokaryotic Type;Mineral and organic ion transporters Iron(III) transporter [MD:M00190] [OT];afuC, fbpC; iron(III) transport system ATP-binding protein [EC:3.6.3.30]	296	51	31	3	4	29	11
K02020	ABC Transporters, Prokaryotic Type;Mineral and organic ion transporters Molybdate transporter [MD:M00189] [OT];modA; molybdate transport system substrate-binding protein	532	43	25	30	4	153	20
K02018	ABC Transporters, Prokaryotic Type;Mineral and organic ion transporters Molybdate transporter [MD:M00189] [OT];modB; molybdate transport system permease protein	171	31	17	13	0	65	4
K02017	ABC Transporters, Prokaryotic Type;Mineral and organic ion transporters Molybdate transporter [MD:M00189] [OT];modC; molybdate transport system ATP-binding protein [EC:3.6.3.29]	232	15	18	17	5	84	4
K05776	ABC Transporters, Prokaryotic Type;Mineral and organic ion transporters Molybdate transporter [MD:M00189] [OT];modF; molybdate transport system ATP-binding protein	316	0	19	14	3	0	6
K15495	ABC Transporters, Prokaryotic Type;Mineral and organic ion transporters Molybdate/tungstate transporter [MD:M00423];wtpA; molybdate/tungstate transport system substrate-binding protein	39	12	2	7	3	1	0
K15496	ABC Transporters, Prokaryotic Type;Mineral and organic ion transporters Molybdate/tungstate transporter [MD:M00423];wtpB; molybdate/tungstate transport system permease protein	27	0	2	3	0	5	0
K15576	ABC Transporters, Prokaryotic Type;Mineral and organic ion transporters Nitrate/nitrite transporter [MD:M00438] [OT];nrtA, nasF, cynA; nitrate/nitrite transport system substrate-binding protein	243	17	9	3	4	175	0
K15577	ABC Transporters, Prokaryotic Type;Mineral and organic ion transporters Nitrate/nitrite transporter [MD:M00438] [OT];nrtB, nasE, cynB; nitrate/nitrite transport system permease protein	172	0	8	0	3	75	0
K15578	ABC Transporters, Prokaryotic Type;Mineral and organic ion transporters Nitrate/nitrite transporter [MD:M00438] [OT];nrtC, nasD; nitrate/nitrite transport system ATP-binding protein [EC:3.6.3.-]	164	0	7	2	7	60	1
K02049	ABC Transporters, Prokaryotic Type;Mineral and organic ion transporters NitT/TauT family transporter [MD:M00188];ABC.SN.A; NitT/TauT family transport system ATP-binding protein	401	110	14	3	14	260	16
K02050	ABC Transporters, Prokaryotic Type;Mineral and organic ion transporters NitT/TauT family transporter [MD:M00188];ABC.SN.P; NitT/TauT family transport system permease protein	346	151	8	7	16	275	9
K02051	ABC Transporters, Prokaryotic Type;Mineral and organic ion transporters NitT/TauT family transporter [MD:M00188];ABC.SN.S; NitT/TauT family transport system substrate-binding protein	285	110	9	8	14	344	18
K05847	ABC Transporters, Prokaryotic Type;Mineral and organic ion transporters Osmoprotectant transporter [MD:M00209];opuA; osmoprotectant transport system ATP-binding protein	374	25	27	12	2	100	7
K05846	ABC Transporters, Prokaryotic Type;Mineral and organic ion transporters Osmoprotectant transporter [MD:M00209];opuBD; osmoprotectant transport system permease protein	728	53	54	24	16	118	15
K05845	ABC Transporters, Prokaryotic Type;Mineral and organic ion transporters Osmoprotectant transporter [MD:M00209];opuC; osmoprotectant transport system substrate-binding protein	376	25	26	5	7	80	8
K15599	ABC Transporters, Prokaryotic Type;Mineral and organic ion transporters Putative hydroxymethylpyrimidine transporter [MD:M00442];thiX; putative hydroxymethylpyrimidine transport system permease protein	102	0	2	3	2	0	10
K15598	ABC Transporters, Prokaryotic Type;Mineral and organic ion transporters Putative hydroxymethylpyrimidine transporter [MD:M00442];thiY; putative hydroxymethylpyrimidine transport system substrate-binding protein	98	0	4	1	1	0	8
K15600	ABC Transporters, Prokaryotic Type;Mineral and organic ion transporters Putative hydroxymethylpyrimidine transporter [MD:M00442];thiZ; putative hydroxymethylpyrimidine transport system ATP-binding protein	76	0	2	4	1	0	5
K02052	ABC Transporters, Prokaryotic Type;Mineral and organic ion transporters Putative spermidine/putrescine transporter [MD:M00193];ABC.SP.A; putative spermidine/putrescine transport system ATP-binding protein	349	133	14	8	0	261	8
K02053	ABC Transporters, Prokaryotic Type;Mineral and organic ion transporters Putative spermidine/putrescine transporter [MD:M00193];ABC.SP.P; putative spermidine/putrescine transport system permease protein	601	117	11	4	0	285	6
K02054	ABC Transporters, Prokaryotic Type;Mineral and organic ion transporters Putative spermidine/putrescine transporter [MD:M00193];ABC.SP.P1; putative spermidine/putrescine transport system permease protein	353	87	11	8	1	214	8
K02055	ABC Transporters, Prokaryotic Type;Mineral and organic ion transporters Putative spermidine/putrescine transporter [MD:M00193];ABC.SP.S; putative spermidine/putrescine transport system substrate-binding protein	674	159	16	8	0	336	8
K05779	ABC Transporters, Prokaryotic Type;Mineral and organic ion transporters Putative thiamine transporter [MD:M00192] [OT];ABC.VB1X.A; putative thiamine transport system ATP-binding protein	0	0	11	0	0	0	0
K05778	ABC Transporters, Prokaryotic Type;Mineral and organic ion transporters Putative thiamine transporter [MD:M00192] [OT];ABC.VB1X.P; putative thiamine transport system permease protein	0	0	12	0	0	0	0
K05777	ABC Transporters, Prokaryotic Type;Mineral and organic ion transporters Putative thiamine transporter [MD:M00192] [OT];ABC.VB1X.S; putative thiamine transport system substrate-binding protein	0	0	8	0	2	0	0
K11073	ABC Transporters, Prokaryotic Type;Mineral and organic ion transporters Putrescine transporter [MD:M00300] [OT];potF; putrescine transport system substrate-binding protein	218	51	18	13	2	261	5
K11076	ABC Transporters, Prokaryotic Type;Mineral and organic ion transporters Putrescine transporter [MD:M00300] [OT];potG; putrescine transport system ATP-binding protein	202	54	24	16	1	75	4
K11075	ABC Transporters, Prokaryotic Type;Mineral and organic ion transporters Putrescine transporter [MD:M00300] [OT];potH; putrescine transport system permease protein	164	51	13	12	5	78	4
K11074	ABC Transporters, Prokaryotic Type;Mineral and organic ion transporters Putrescine transporter [MD:M00300] [OT];potI; putrescine transport system permease protein	177	54	21	16	0	79	4
K11072	ABC Transporters, Prokaryotic Type;Mineral and organic ion transporters Spermidine/putrescine transporter [MD:M00299] [OT];potA; spermidine/putrescine transport system ATP-binding protein [EC:3.6.3.31]	75	0	11	1	7	1	4
K11071	ABC Transporters, Prokaryotic Type;Mineral and organic ion transporters Spermidine/putrescine transporter [MD:M00299] [OT];potB; spermidine/putrescine transport system permease protein	51	3	13	0	5	0	4
K11070	ABC Transporters, Prokaryotic Type;Mineral and organic ion transporters Spermidine/putrescine transporter [MD:M00299] [OT];potC; spermidine/putrescine transport system permease protein	66	4	12	1	6	1	4
K11069	ABC Transporters, Prokaryotic Type;Mineral and organic ion transporters Spermidine/putrescine transporter [MD:M00299] [OT];potD; spermidine/putrescine transport system substrate-binding protein	67	4	18	0	1	56	5
K02045	ABC Transporters, Prokaryotic Type;Mineral and organic ion transporters Sulfate transporter [MD:M00185] [OT];cysA; sulfate transport system ATP-binding protein [EC:3.6.3.25]	244	24	12	15	2	78	4
K02048	ABC Transporters, Prokaryotic Type;Mineral and organic ion transporters Sulfate transporter [MD:M00185] [OT];cysP, sbp; sulfate transport system substrate-binding protein	477	45	38	32	7	135	8
K02046	ABC Transporters, Prokaryotic Type;Mineral and organic ion transporters Sulfate transporter [MD:M00185] [OT];cysU; sulfate transport system permease protein	176	17	7	17	6	59	4
K02047	ABC Transporters, Prokaryotic Type;Mineral and organic ion transporters Sulfate transporter [MD:M00185] [OT];cysW; sulfate transport system permease protein	171	22	18	19	0	68	5
K15553	ABC Transporters, Prokaryotic Type;Mineral and organic ion transporters Sulfonate transporter [MD:M00436];ssuA; sulfonate transport system substrate-binding protein	644	143	16	58	10	401	19
K15555	ABC Transporters, Prokaryotic Type;Mineral and organic ion transporters Sulfonate transporter [MD:M00436];ssuB; sulfonate transport system ATP-binding protein [EC:3.6.3.-]	184	42	15	14	4	103	13
K15554	ABC Transporters, Prokaryotic Type;Mineral and organic ion transporters Sulfonate transporter [MD:M00436];ssuC; sulfonate transport system permease protein	30	58	10	22	11	132	5
K15551	ABC Transporters, Prokaryotic Type;Mineral and organic ion transporters Taurine transporter [MD:M00435] [OT];tauA; taurine transport system substrate-binding protein	257	11	13	13	0	78	3
K10831	ABC Transporters, Prokaryotic Type;Mineral and organic ion transporters Taurine transporter [MD:M00435] [OT];tauB; taurine transport system ATP-binding protein [EC:3.6.3.36]	188	16	11	13	0	47	3
K15552	ABC Transporters, Prokaryotic Type;Mineral and organic ion transporters Taurine transporter [MD:M00435] [OT];tauC; taurine transport system permease protein	204	20	11	17	1	55	4
K02064	ABC Transporters, Prokaryotic Type;Mineral and organic ion transporters Thiamine transporter [MD:M00191] [OT];thiB, tbpA; thiamine transport system substrate-binding protein	229	0	18	13	2	0	6
K02063	ABC Transporters, Prokaryotic Type;Mineral and organic ion transporters Thiamine transporter [MD:M00191] [OT];thiP; thiamine transport system permease protein	321	0	21	18	5	0	5
K02062	ABC Transporters, Prokaryotic Type;Mineral and organic ion transporters Thiamine transporter [MD:M00191] [OT];thiQ; thiamine transport system ATP-binding protein	170	0	16	13	2	0	4
K19226	ABC Transporters, Prokaryotic Type;Peptide and nickel transporters Cationic peptide transporter [MD:M00739] [OT];sapA; cationic peptide transport system substrate-binding protein	296	0	13	17	3	0	6
K19227	ABC Transporters, Prokaryotic Type;Peptide and nickel transporters Cationic peptide transporter [MD:M00739] [OT];sapB; cationic peptide transport system permease protein	209	0	14	18	1	0	4
K19228	ABC Transporters, Prokaryotic Type;Peptide and nickel transporters Cationic peptide transporter [MD:M00739] [OT];sapC; cationic peptide transport system permease protein	173	0	13	11	3	0	6
K19229	ABC Transporters, Prokaryotic Type;Peptide and nickel transporters Cationic peptide transporter [MD:M00739] [OT];sapD; cationic peptide transport system ATP-binding protein	200	0	12	13	0	0	5
K19230	ABC Transporters, Prokaryotic Type;Peptide and nickel transporters Cationic peptide transporter [MD:M00739] [OT];sapF; cationic peptide transport system ATP-binding protein	170	0	12	12	1	0	3
K12368	ABC Transporters, Prokaryotic Type;Peptide and nickel transporters Dipeptide transporter [MD:M00324] [OT];dppA; dipeptide transport system substrate-binding protein	583	77	36	32	14	255	13
K12369	ABC Transporters, Prokaryotic Type;Peptide and nickel transporters Dipeptide transporter [MD:M00324] [OT];dppB; dipeptide transport system permease protein	193	10	6	16	4	97	3
K12370	ABC Transporters, Prokaryotic Type;Peptide and nickel transporters Dipeptide transporter [MD:M00324] [OT];dppC; dipeptide transport system permease protein	175	22	11	12	5	59	3
K12371	ABC Transporters, Prokaryotic Type;Peptide and nickel transporters Dipeptide transporter [MD:M00324] [OT];dppD; dipeptide transport system ATP-binding protein	207	14	14	13	4	83	3
K12372	ABC Transporters, Prokaryotic Type;Peptide and nickel transporters Dipeptide transporter [MD:M00324] [OT];dppF; dipeptide transport system ATP-binding protein	221	24	14	17	3	76	4
K13892	ABC Transporters, Prokaryotic Type;Peptide and nickel transporters Glutathione transporter [MD:M00348] [OT];gsiA; glutathione transport system ATP-binding protein	542	33	127	14	2	0	4
K13889	ABC Transporters, Prokaryotic Type;Peptide and nickel transporters Glutathione transporter [MD:M00348] [OT];gsiB; glutathione transport system substrate-binding protein	426	22	26	24	113	0	8
K13890	ABC Transporters, Prokaryotic Type;Peptide and nickel transporters Glutathione transporter [MD:M00348] [OT];gsiC; glutathione transport system permease protein	262	22	106	14	3	0	5
K13891	ABC Transporters, Prokaryotic Type;Peptide and nickel transporters Glutathione transporter [MD:M00348] [OT];gsiD; glutathione transport system permease protein	336	15	19	12	3	0	5
K13893	ABC Transporters, Prokaryotic Type;Peptide and nickel transporters Microcin C transporter [MD:M00349] [OT];yejA; microcin C transport system substrate-binding protein	321	54	24	19	1	84	6
K13894	ABC Transporters, Prokaryotic Type;Peptide and nickel transporters Microcin C transporter [MD:M00349] [OT];yejB; microcin C transport system permease protein	210	36	11	14	5	55	5
K13895	ABC Transporters, Prokaryotic Type;Peptide and nickel transporters Microcin C transporter [MD:M00349] [OT];yejE; microcin C transport system permease protein	199	36	17	16	4	40	3
K13896	ABC Transporters, Prokaryotic Type;Peptide and nickel transporters Microcin C transporter [MD:M00349] [OT];yejF; microcin C transport system ATP-binding protein	309	41	27	19	5	40	3
K15584	ABC Transporters, Prokaryotic Type;Peptide and nickel transporters Nickel transporter [MD:M00440] [OT];nikA; nickel transport system substrate-binding protein	0	0	13	0	4	0	0
K15585	ABC Transporters, Prokaryotic Type;Peptide and nickel transporters Nickel transporter [MD:M00440] [OT];nikB; nickel transport system permease protein	0	0	10	0	3	1	0
K15586	ABC Transporters, Prokaryotic Type;Peptide and nickel transporters Nickel transporter [MD:M00440] [OT];nikC; nickel transport system permease protein	0	0	7	0	5	0	0
K15587	ABC Transporters, Prokaryotic Type;Peptide and nickel transporters Nickel transporter [MD:M00440] [OT];nikD; nickel transport system ATP-binding protein [EC:3.6.3.24]	0	0	5	0	2	0	0
K10824	ABC Transporters, Prokaryotic Type;Peptide and nickel transporters Nickel transporter [MD:M00440] [OT];nikE; nickel transport system ATP-binding protein [EC:3.6.3.24]	0	0	5	0	2	0	0
K15580	ABC Transporters, Prokaryotic Type;Peptide and nickel transporters Oligopeptide transporter [MD:M00439];oppA, mppA; oligopeptide transport system substrate-binding protein	1046	21	69	61	3	0	20
K15581	ABC Transporters, Prokaryotic Type;Peptide and nickel transporters Oligopeptide transporter [MD:M00439];oppB; oligopeptide transport system permease protein	155	23	14	13	0	0	5
K15582	ABC Transporters, Prokaryotic Type;Peptide and nickel transporters Oligopeptide transporter [MD:M00439];oppC; oligopeptide transport system permease protein	183	17	16	10	0	0	3
K15583	ABC Transporters, Prokaryotic Type;Peptide and nickel transporters Oligopeptide transporter [MD:M00439];oppD; oligopeptide transport system ATP-binding protein	156	20	17	7	0	0	5
K10823	ABC Transporters, Prokaryotic Type;Peptide and nickel transporters Oligopeptide transporter [MD:M00439];oppF; oligopeptide transport system ATP-binding protein	206	21	12	13	1	0	5
K02031	ABC Transporters, Prokaryotic Type;Peptide and nickel transporters Peptides/nickel transporter [MD:M00239];ABC.PE.A; peptide/nickel transport system ATP-binding protein	413	12	57	23	17	159	10
K02032	ABC Transporters, Prokaryotic Type;Peptide and nickel transporters Peptides/nickel transporter [MD:M00239];ABC.PE.A1; peptide/nickel transport system ATP-binding protein	1109	73	70	72	26	412	10
K02033	ABC Transporters, Prokaryotic Type;Peptide and nickel transporters Peptides/nickel transporter [MD:M00239];ABC.PE.P; peptide/nickel transport system permease protein	933	72	74	55	20	306	11
K02034	ABC Transporters, Prokaryotic Type;Peptide and nickel transporters Peptides/nickel transporter [MD:M00239];ABC.PE.P1; peptide/nickel transport system permease protein	820	51	60	58	17	312	15
K02035	ABC Transporters, Prokaryotic Type;Peptide and nickel transporters Peptides/nickel transporter [MD:M00239];ABC.PE.S; peptide/nickel transport system substrate-binding protein	1754	116	108	94	35	574	19
K09997	ABC Transporters, Prokaryotic Type;Phosphate and amino acid transporters Arginine transporter [MD:M00229] [OT];artI; arginine transport system substrate-binding protein	162	0	18	11	0	0	3
K09996	ABC Transporters, Prokaryotic Type;Phosphate and amino acid transporters Arginine transporter [MD:M00229] [OT];artJ; arginine transport system substrate-binding protein	173	0	23	10	2	0	4
K09998	ABC Transporters, Prokaryotic Type;Phosphate and amino acid transporters Arginine transporter [MD:M00229] [OT];artM; arginine transport system permease protein	201	0	12	8	0	0	3
K10000	ABC Transporters, Prokaryotic Type;Phosphate and amino acid transporters Arginine transporter [MD:M00229] [OT];artP; arginine transport system ATP-binding protein [EC:3.6.3.-]	160	0	18	5	0	0	3
K09999	ABC Transporters, Prokaryotic Type;Phosphate and amino acid transporters Arginine transporter [MD:M00229] [OT];artQ; arginine transport system permease protein	144	0	13	9	5	0	3
K10022	ABC Transporters, Prokaryotic Type;Phosphate and amino acid transporters Arginine/ornithine transporter [MD:M00235];aotJ; arginine/ornithine transport system substrate-binding protein	0	0	0	0	0	13	0
K10023	ABC Transporters, Prokaryotic Type;Phosphate and amino acid transporters Arginine/ornithine transporter [MD:M00235];aotM; arginine/ornithine transport system permease protein	0	0	0	0	0	3	0
K10025	ABC Transporters, Prokaryotic Type;Phosphate and amino acid transporters Arginine/ornithine transporter [MD:M00235];aotP; arginine/ornithine transport system ATP-binding protein [EC:3.6.3.-]	0	0	0	0	0	17	0
K10024	ABC Transporters, Prokaryotic Type;Phosphate and amino acid transporters Arginine/ornithine transporter [MD:M00235];aotQ; arginine/ornithine transport system permease protein	1	0	0	0	0	9	0
K01996	ABC Transporters, Prokaryotic Type;Phosphate and amino acid transporters Branched-chain amino acid transporter [MD:M00237] [OT];livF; branched-chain amino acid transport system ATP-binding protein	218	121	50	11	5	180	13
K01995	ABC Transporters, Prokaryotic Type;Phosphate and amino acid transporters Branched-chain amino acid transporter [MD:M00237] [OT];livG; branched-chain amino acid transport system ATP-binding protein	196	90	31	13	8	193	9
K01997	ABC Transporters, Prokaryotic Type;Phosphate and amino acid transporters Branched-chain amino acid transporter [MD:M00237] [OT];livH; branched-chain amino acid transport system permease protein	201	102	26	18	20	206	12
K01999	ABC Transporters, Prokaryotic Type;Phosphate and amino acid transporters Branched-chain amino acid transporter [MD:M00237] [OT];livK; branched-chain amino acid transport system substrate-binding protein	360	311	70	14	25	240	11
K01998	ABC Transporters, Prokaryotic Type;Phosphate and amino acid transporters Branched-chain amino acid transporter [MD:M00237] [OT];livM; branched-chain amino acid transport system permease protein	330	129	53	16	9	246	12
K10010	ABC Transporters, Prokaryotic Type;Phosphate and amino acid transporters Cystine transporter [MD:M00234] [OT];ABC.CYST.A; cystine transport system ATP-binding protein [EC:3.6.3.-]	199	11	13	7	0	58	4
K10009	ABC Transporters, Prokaryotic Type;Phosphate and amino acid transporters Cystine transporter [MD:M00234] [OT];ABC.CYST.P; cystine transport system permease protein	143	35	13	17	1	45	4
K02424	ABC Transporters, Prokaryotic Type;Phosphate and amino acid transporters Cystine transporter [MD:M00234] [OT];fliY; cystine transport system substrate-binding protein	178	47	13	8	2	63	5
K02072	ABC Transporters, Prokaryotic Type;Phosphate and amino acid transporters D-Methionine transporter [MD:M00238] [OT];metI; D-methionine transport system permease protein	323	24	35	20	12	130	7
K02071	ABC Transporters, Prokaryotic Type;Phosphate and amino acid transporters D-Methionine transporter [MD:M00238] [OT];metN; D-methionine transport system ATP-binding protein	460	33	52	33	5	159	14
K02073	ABC Transporters, Prokaryotic Type;Phosphate and amino acid transporters D-Methionine transporter [MD:M00238] [OT];metQ; D-methionine transport system substrate-binding protein	549	68	52	52	9	294	15
K09969	ABC Transporters, Prokaryotic Type;Phosphate and amino acid transporters General L-amino acid transporter [MD:M00232] [OT];aapJ, bztA; general L-amino acid transport system substrate-binding protein	186	1	11	14	5	76	0
K09971	ABC Transporters, Prokaryotic Type;Phosphate and amino acid transporters General L-amino acid transporter [MD:M00232] [OT];aapM, bztC; general L-amino acid transport system permease protein	187	0	17	13	2	42	0
K09972	ABC Transporters, Prokaryotic Type;Phosphate and amino acid transporters General L-amino acid transporter [MD:M00232] [OT];aapP, bztD; general L-amino acid transport system ATP-binding protein [EC:3.6.3.-]	184	0	14	19	0	70	0
K09970	ABC Transporters, Prokaryotic Type;Phosphate and amino acid transporters General L-amino acid transporter [MD:M00232] [OT];aapQ, bztB; general L-amino acid transport system permease protein	201	1	12	20	1	68	0
K10008	ABC Transporters, Prokaryotic Type;Phosphate and amino acid transporters Glutamate transporter [MD:M00233] [OT];gluA; glutamate transport system ATP-binding protein [EC:3.6.3.-]	0	1	0	0	0	0	0
K10006	ABC Transporters, Prokaryotic Type;Phosphate and amino acid transporters Glutamate transporter [MD:M00233] [OT];gluC; glutamate transport system permease protein	0	1	0	0	0	0	0
K10007	ABC Transporters, Prokaryotic Type;Phosphate and amino acid transporters Glutamate transporter [MD:M00233] [OT];gluD; glutamate transport system permease protein	0	1	0	0	0	0	0
K10001	ABC Transporters, Prokaryotic Type;Phosphate and amino acid transporters Glutamate/aspartate transporter [MD:M00230] [OT];gltI, aatJ; glutamate/aspartate transport system substrate-binding protein	169	68	19	21	5	10	4
K10003	ABC Transporters, Prokaryotic Type;Phosphate and amino acid transporters Glutamate/aspartate transporter [MD:M00230] [OT];gltJ, aatQ; glutamate/aspartate transport system permease protein	158	9	14	10	2	10	5
K10002	ABC Transporters, Prokaryotic Type;Phosphate and amino acid transporters Glutamate/aspartate transporter [MD:M00230] [OT];gltK, aatM; glutamate/aspartate transport system permease protein	124	17	12	13	2	12	4
K10004	ABC Transporters, Prokaryotic Type;Phosphate and amino acid transporters Glutamate/aspartate transporter [MD:M00230] [OT];gltL, aatP; glutamate/aspartate transport system ATP-binding protein [EC:3.6.3.-]	158	37	20	14	3	12	5
K10036	ABC Transporters, Prokaryotic Type;Phosphate and amino acid transporters Glutamine transporter [MD:M00227] [OT];glnH; glutamine transport system substrate-binding protein	216	10	20	8	1	24	5
K10037	ABC Transporters, Prokaryotic Type;Phosphate and amino acid transporters Glutamine transporter [MD:M00227] [OT];glnP; glutamine transport system permease protein	138	5	20	12	4	34	3
K10038	ABC Transporters, Prokaryotic Type;Phosphate and amino acid transporters Glutamine transporter [MD:M00227] [OT];glnQ; glutamine transport system ATP-binding protein [EC:3.6.3.-]	192	7	20	14	3	19	3
K10014	ABC Transporters, Prokaryotic Type;Phosphate and amino acid transporters Histidine transporter [MD:M00226] [OT];hisJ; histidine transport system substrate-binding protein	165	55	12	14	6	50	7
K10015	ABC Transporters, Prokaryotic Type;Phosphate and amino acid transporters Histidine transporter [MD:M00226] [OT];hisM; histidine transport system permease protein	159	35	6	16	5	61	3
K10017	ABC Transporters, Prokaryotic Type;Phosphate and amino acid transporters Histidine transporter [MD:M00226] [OT];hisP; histidine transport system ATP-binding protein [EC:3.6.3.21]	174	50	16	12	1	64	4
K10016	ABC Transporters, Prokaryotic Type;Phosphate and amino acid transporters Histidine transporter [MD:M00226] [OT];hisQ; histidine transport system permease protein	139	34	10	7	0	54	3
K16957	ABC Transporters, Prokaryotic Type;Phosphate and amino acid transporters L-Cystine transporter [MD:M00585] [OT];tcyK; L-cystine transport system substrate-binding protein	78	0	7	5	1	0	0
K16958	ABC Transporters, Prokaryotic Type;Phosphate and amino acid transporters L-Cystine transporter [MD:M00585] [OT];tcyL; L-cystine transport system permease protein	72	0	0	11	0	0	0
K16959	ABC Transporters, Prokaryotic Type;Phosphate and amino acid transporters L-Cystine transporter [MD:M00585] [OT];tcyM; L-cystine transport system permease protein	81	0	4	5	0	0	0
K16960	ABC Transporters, Prokaryotic Type;Phosphate and amino acid transporters L-Cystine transporter [MD:M00585] [OT];tcyN; L-cystine transport system ATP-binding protein [EC:3.6.3.-]	78	0	7	0	3	0	0
K10013	ABC Transporters, Prokaryotic Type;Phosphate and amino acid transporters Lysine/arginine/ornithine transporter [MD:M00225];ABC.ARG.S, argT; lysine/arginine/ornithine transport system substrate-binding protein	470	90	43	15	6	3	6
K10015	ABC Transporters, Prokaryotic Type;Phosphate and amino acid transporters Lysine/arginine/ornithine transporter [MD:M00225];hisM; histidine transport system permease protein	159	35	6	16	5	61	3
K10017	ABC Transporters, Prokaryotic Type;Phosphate and amino acid transporters Lysine/arginine/ornithine transporter [MD:M00225];hisP; histidine transport system ATP-binding protein [EC:3.6.3.21]	174	50	16	12	1	64	4
K10016	ABC Transporters, Prokaryotic Type;Phosphate and amino acid transporters Lysine/arginine/ornithine transporter [MD:M00225];hisQ; histidine transport system permease protein	139	34	10	7	0	54	3
K10019	ABC Transporters, Prokaryotic Type;Phosphate and amino acid transporters Octopine/nopaline transporter [MD:M00231];occM, nocM; octopine/nopaline transport system permease protein	152	7	0	1	1	6	0
K10021	ABC Transporters, Prokaryotic Type;Phosphate and amino acid transporters Octopine/nopaline transporter [MD:M00231];occP, nocP; octopine/nopaline transport system ATP-binding protein [EC:3.6.3.-]	195	5	6	1	2	3	0
K10020	ABC Transporters, Prokaryotic Type;Phosphate and amino acid transporters Octopine/nopaline transporter [MD:M00231];occQ, nocQ; octopine/nopaline transport system permease protein	158	7	0	1	0	7	0
K10018	ABC Transporters, Prokaryotic Type;Phosphate and amino acid transporters Octopine/nopaline transporter [MD:M00231];occT, nocT; octopine/nopaline transport system substrate-binding protein	186	10	2	0	0	7	0
K02038	ABC Transporters, Prokaryotic Type;Phosphate and amino acid transporters Phosphate transporter [MD:M00222] [OT];pstA; phosphate transport system permease protein	566	17	14	39	3	186	10
K02036	ABC Transporters, Prokaryotic Type;Phosphate and amino acid transporters Phosphate transporter [MD:M00222] [OT];pstB; phosphate transport system ATP-binding protein [EC:3.6.3.27]	363	21	17	21	1	139	7
K02037	ABC Transporters, Prokaryotic Type;Phosphate and amino acid transporters Phosphate transporter [MD:M00222] [OT];pstC; phosphate transport system permease protein	585	20	15	43	5	232	9
K02040	ABC Transporters, Prokaryotic Type;Phosphate and amino acid transporters Phosphate transporter [MD:M00222] [OT];pstS; phosphate transport system substrate-binding protein	437	38	12	32	6	243	9
K02041	ABC Transporters, Prokaryotic Type;Phosphate and amino acid transporters Phosphonate transporter [MD:M00223] [OT];phnC; phosphonate transport system ATP-binding protein [EC:3.6.3.28]	138	4	13	0	0	74	4
K02044	ABC Transporters, Prokaryotic Type;Phosphate and amino acid transporters Phosphonate transporter [MD:M00223] [OT];phnD; phosphonate transport system substrate-binding protein	208	2	14	0	0	74	3
K02042	ABC Transporters, Prokaryotic Type;Phosphate and amino acid transporters Phosphonate transporter [MD:M00223] [OT];phnE; phosphonate transport system permease protein	362	1	11	0	0	103	7
K16961	ABC Transporters, Prokaryotic Type;Phosphate and amino acid transporters Putative amino-acid transporter [MD:M00586] [OT];yxeM; putative amino-acid transport system substrate-binding protein	20	0	0	0	0	0	2
K16962	ABC Transporters, Prokaryotic Type;Phosphate and amino acid transporters Putative amino-acid transporter [MD:M00586] [OT];yxeN; putative amino-acid transport system permease protein	20	0	0	0	0	0	0
K16963	ABC Transporters, Prokaryotic Type;Phosphate and amino acid transporters Putative amino-acid transporter [MD:M00586] [OT];yxeO; putative amino-acid transport system ATP-binding protein [EC:3.6.3.-]	19	0	0	0	0	0	0
K02028	ABC Transporters, Prokaryotic Type;Phosphate and amino acid transporters Putative polar amino acid transporter [MD:M00236];ABC.PA.A; polar amino acid transport system ATP-binding protein [EC:3.6.3.21]	910	75	50	65	13	339	13
K02029	ABC Transporters, Prokaryotic Type;Phosphate and amino acid transporters Putative polar amino acid transporter [MD:M00236];ABC.PA.P; polar amino acid transport system permease protein	1397	202	91	88	59	750	26
K02030	ABC Transporters, Prokaryotic Type;Phosphate and amino acid transporters Putative polar amino acid transporter [MD:M00236];ABC.PA.S; polar amino acid transport system substrate-binding protein	1376	229	89	44	51	980	40
K11959	ABC Transporters, Prokaryotic Type;Phosphate and amino acid transporters Urea transporter [MD:M00323] [OT];urtA; urea transport system substrate-binding protein	238	38	11	4	0	138	6
K11960	ABC Transporters, Prokaryotic Type;Phosphate and amino acid transporters Urea transporter [MD:M00323] [OT];urtB; urea transport system permease protein	325	40	14	6	0	106	4
K11961	ABC Transporters, Prokaryotic Type;Phosphate and amino acid transporters Urea transporter [MD:M00323] [OT];urtC; urea transport system permease protein	237	38	13	4	0	96	3
K11962	ABC Transporters, Prokaryotic Type;Phosphate and amino acid transporters Urea transporter [MD:M00323] [OT];urtD; urea transport system ATP-binding protein	209	32	8	4	0	99	3
K11963	ABC Transporters, Prokaryotic Type;Phosphate and amino acid transporters Urea transporter [MD:M00323] [OT];urtE; urea transport system ATP-binding protein	163	23	7	2	0	98	4
K10558	ABC Transporters, Prokaryotic Type;Saccharide, polyol, and lipid transporters AI-2 transporter [MD:M00219] [OT];lsrA, ego; AI-2 transport system ATP-binding protein	2	0	13	0	2	0	0
K10555	ABC Transporters, Prokaryotic Type;Saccharide, polyol, and lipid transporters AI-2 transporter [MD:M00219] [OT];lsrB; AI-2 transport system substrate-binding protein	3	0	8	0	1	0	0
K10556	ABC Transporters, Prokaryotic Type;Saccharide, polyol, and lipid transporters AI-2 transporter [MD:M00219] [OT];lsrC; AI-2 transport system permease protein	2	0	10	0	0	0	3
K10557	ABC Transporters, Prokaryotic Type;Saccharide, polyol, and lipid transporters AI-2 transporter [MD:M00219] [OT];lsrD; AI-2 transport system permease protein	2	0	12	0	1	0	0
K10235	ABC Transporters, Prokaryotic Type;Saccharide, polyol, and lipid transporters alpha-Glucoside transporter [MD:M00201] [OT];aglK; alpha-glucoside transport system ATP-binding protein	0	0	0	0	0	3	0
K10112	ABC Transporters, Prokaryotic Type;Saccharide, polyol, and lipid transporters alpha-Glucoside transporter [MD:M00201] [OT];msmX, msmK, malK, sugC, ggtA, msiK; multiple sugar transport system ATP-binding protein	100	38	14	0	2	38	5
K15770	ABC Transporters, Prokaryotic Type;Saccharide, polyol, and lipid transporters Arabinogalactan oligomer/maltooligosaccharide transport system [MD:M00491] [OT];cycB, ganO; arabinogalactan oligomer / maltooligosaccharide transport system substrate-binding protein	76	0	7	0	2	0	0
K15771	ABC Transporters, Prokaryotic Type;Saccharide, polyol, and lipid transporters Arabinogalactan oligomer/maltooligosaccharide transport system [MD:M00491] [OT];ganP; arabinogalactan oligomer / maltooligosaccharide transport system permease protein	55	0	11	0	2	0	0
K15772	ABC Transporters, Prokaryotic Type;Saccharide, polyol, and lipid transporters Arabinogalactan oligomer/maltooligosaccharide transport system [MD:M00491] [OT];ganQ; arabinogalactan oligomer / maltooligosaccharide transport system permease protein	50	0	2	0	1	0	0
K10111	ABC Transporters, Prokaryotic Type;Saccharide, polyol, and lipid transporters Arabinogalactan oligomer/maltooligosaccharide transport system [MD:M00491] [OT];malK, mtlK, thuK; multiple sugar transport system ATP-binding protein [EC:3.6.3.-]	460	58	18	6	10	97	3
K10112	ABC Transporters, Prokaryotic Type;Saccharide, polyol, and lipid transporters Arabinogalactan oligomer/maltooligosaccharide transport system [MD:M00491] [OT];msmX, msmK, malK, sugC, ggtA, msiK; multiple sugar transport system ATP-binding protein	100	38	14	0	2	38	5
K10112	ABC Transporters, Prokaryotic Type;Saccharide, polyol, and lipid transporters Arabinosaccharide transporter [MD:M00602] [OT];msmX, msmK, malK, sugC, ggtA, msiK; multiple sugar transport system ATP-binding protein	100	38	14	0	2	38	5
K10112	ABC Transporters, Prokaryotic Type;Saccharide, polyol, and lipid transporters Cellobiose transporter [MD:M00206] [OT];msmX, msmK, malK, sugC, ggtA, msiK; multiple sugar transport system ATP-binding protein	100	38	14	0	2	38	5
K10551	ABC Transporters, Prokaryotic Type;Saccharide, polyol, and lipid transporters D-Allose transporter [MD:M00217] [OT];alsA; D-allose transport system ATP-binding protein [EC:3.6.3.17]	0	0	2	0	0	0	0
K10549	ABC Transporters, Prokaryotic Type;Saccharide, polyol, and lipid transporters D-Allose transporter [MD:M00217] [OT];alsB; D-allose transport system substrate-binding protein	0	0	1	0	0	0	0
K10550	ABC Transporters, Prokaryotic Type;Saccharide, polyol, and lipid transporters D-Allose transporter [MD:M00217] [OT];alsC; D-allose transport system permease protein	0	0	1	0	0	0	0
K10543	ABC Transporters, Prokaryotic Type;Saccharide, polyol, and lipid transporters D-Xylose transporter [MD:M00215] [OT];xylF; D-xylose transport system substrate-binding protein	233	29	19	1	7	74	0
K10545	ABC Transporters, Prokaryotic Type;Saccharide, polyol, and lipid transporters D-Xylose transporter [MD:M00215] [OT];xylG; D-xylose transport system ATP-binding protein [EC:3.6.3.17]	279	43	22	0	12	122	1
K10544	ABC Transporters, Prokaryotic Type;Saccharide, polyol, and lipid transporters D-Xylose transporter [MD:M00215] [OT];xylH; D-xylose transport system permease protein	215	41	18	2	4	105	1
K17204	ABC Transporters, Prokaryotic Type;Saccharide, polyol, and lipid transporters Erythritol transporter [MD:M00590] [OT];eryE; erythritol transport system ATP-binding protein	373	7	7	8	4	0	4
K17202	ABC Transporters, Prokaryotic Type;Saccharide, polyol, and lipid transporters Erythritol transporter [MD:M00590] [OT];K17202, eryG; erythritol transport system substrate-binding protein	252	2	4	8	2	0	2
K17203	ABC Transporters, Prokaryotic Type;Saccharide, polyol, and lipid transporters Erythritol transporter [MD:M00590] [OT];K17203, eryF; erythritol transport system permease protein	260	13	4	10	3	0	2
K10554	ABC Transporters, Prokaryotic Type;Saccharide, polyol, and lipid transporters Fructose transporter [MD:M00218] [OT];frcA; fructose transport system ATP-binding protein	0	1	0	0	0	55	0
K10552	ABC Transporters, Prokaryotic Type;Saccharide, polyol, and lipid transporters Fructose transporter [MD:M00218] [OT];frcB; fructose transport system substrate-binding protein	118	2	0	0	0	43	0
K10553	ABC Transporters, Prokaryotic Type;Saccharide, polyol, and lipid transporters Fructose transporter [MD:M00218] [OT];frcC; fructose transport system permease protein	0	1	0	0	0	65	0
K18480	ABC Transporters, Prokaryotic Type;Saccharide, polyol, and lipid transporters gamma-Hexachlorocyclohexane transporter [MD:M00669];linN; cholesterol transport system auxiliary component	0	17	0	0	0	13	0
K02067	ABC Transporters, Prokaryotic Type;Saccharide, polyol, and lipid transporters gamma-Hexachlorocyclohexane transporter [MD:M00669];mlaD, linM; phospholipid/cholesterol/gamma-HCH transport system substrate-binding protein	137	25	15	9	0	61	3
K02066	ABC Transporters, Prokaryotic Type;Saccharide, polyol, and lipid transporters gamma-Hexachlorocyclohexane transporter [MD:M00669];mlaE, linK; phospholipid/cholesterol/gamma-HCH transport system permease protein	180	33	10	13	4	72	3
K02065	ABC Transporters, Prokaryotic Type;Saccharide, polyol, and lipid transporters gamma-Hexachlorocyclohexane transporter [MD:M00669];mlaF, linL, mkl; phospholipid/cholesterol/gamma-HCH transport system ATP-binding protein	167	33	13	15	1	87	3
K17315	ABC Transporters, Prokaryotic Type;Saccharide, polyol, and lipid transporters Glucose/mannose transporter [MD:M00605] [OT];gtsA, glcE; glucose/mannose transport system substrate-binding protein	0	26	0	0	0	53	0
K17316	ABC Transporters, Prokaryotic Type;Saccharide, polyol, and lipid transporters Glucose/mannose transporter [MD:M00605] [OT];gtsB, glcF; glucose/mannose transport system permease protein	0	12	0	0	0	39	0
K17317	ABC Transporters, Prokaryotic Type;Saccharide, polyol, and lipid transporters Glucose/mannose transporter [MD:M00605] [OT];gtsC, glcG; glucose/mannose transport system permease protein	0	21	0	0	0	37	0
K10112	ABC Transporters, Prokaryotic Type;Saccharide, polyol, and lipid transporters Glucose/mannose transporter [MD:M00605] [OT];msmX, msmK, malK, sugC, ggtA, msiK; multiple sugar transport system ATP-binding protein	100	38	14	0	2	38	5
K17323	ABC Transporters, Prokaryotic Type;Saccharide, polyol, and lipid transporters Glycerol transporter [MD:M00607] [OT];glpQ; glycerol transport system permease protein	0	3	0	0	0	13	0
K17324	ABC Transporters, Prokaryotic Type;Saccharide, polyol, and lipid transporters Glycerol transporter [MD:M00607] [OT];glpS; glycerol transport system ATP-binding protein	0	1	0	0	0	10	0
K17321	ABC Transporters, Prokaryotic Type;Saccharide, polyol, and lipid transporters Glycerol transporter [MD:M00607] [OT];glpV; glycerol transport system substrate-binding protein	0	2	0	0	0	18	0
K17322	ABC Transporters, Prokaryotic Type;Saccharide, polyol, and lipid transporters Glycerol transporter [MD:M00607] [OT];K17322, glpP; glycerol transport system permease protein	0	4	0	0	0	14	0
K17325	ABC Transporters, Prokaryotic Type;Saccharide, polyol, and lipid transporters Glycerol transporter [MD:M00607] [OT];K17325, glpT; glycerol transport system ATP-binding protein	0	2	0	0	0	5	0
K17210	ABC Transporters, Prokaryotic Type;Saccharide, polyol, and lipid transporters Inositol transporter [MD:M00592] [OT];iatA; inositol transport system ATP-binding protein	0	0	12	0	0	0	0
K17209	ABC Transporters, Prokaryotic Type;Saccharide, polyol, and lipid transporters Inositol transporter [MD:M00592] [OT];iatP; inositol transport system permease protein	0	0	10	0	0	0	0
K17208	ABC Transporters, Prokaryotic Type;Saccharide, polyol, and lipid transporters Inositol transporter [MD:M00592] [OT];K17208, ibpA; inositol transport system substrate-binding protein	0	0	9	0	0	0	0
K17213	ABC Transporters, Prokaryotic Type;Saccharide, polyol, and lipid transporters Inositol transporter [MD:M00593] [OT];K17213; inositol transport system substrate-binding protein	319	14	7	12	0	67	7
K17214	ABC Transporters, Prokaryotic Type;Saccharide, polyol, and lipid transporters Inositol transporter [MD:M00593] [OT];K17214; inositol transport system permease protein	212	10	1	15	1	78	3
K17215	ABC Transporters, Prokaryotic Type;Saccharide, polyol, and lipid transporters Inositol transporter [MD:M00593] [OT];K17215; inositol transport system ATP-binding protein	270	13	0	14	5	114	4
K17237	ABC Transporters, Prokaryotic Type;Saccharide, polyol, and lipid transporters Inositol-phosphate transporter [MD:M00599] [OT];inoE; inositol-phosphate transport system substrate-binding protein	125	0	0	0	0	0	0
K17238	ABC Transporters, Prokaryotic Type;Saccharide, polyol, and lipid transporters Inositol-phosphate transporter [MD:M00599] [OT];inoF; inositol-phosphate transport system permease protein	81	0	0	0	0	0	0
K17239	ABC Transporters, Prokaryotic Type;Saccharide, polyol, and lipid transporters Inositol-phosphate transporter [MD:M00599] [OT];inoG; inositol-phosphate transport system permease protein	101	0	0	0	0	0	0
K17240	ABC Transporters, Prokaryotic Type;Saccharide, polyol, and lipid transporters Inositol-phosphate transporter [MD:M00599] [OT];inoK; inositol-phosphate transport system ATP-binding protein	105	0	0	0	0	0	0
K10537	ABC Transporters, Prokaryotic Type;Saccharide, polyol, and lipid transporters L-Arabinose transporter [MD:M00213] [OT];araF; L-arabinose transport system substrate-binding protein	185	47	23	18	0	80	14
K10539	ABC Transporters, Prokaryotic Type;Saccharide, polyol, and lipid transporters L-Arabinose transporter [MD:M00213] [OT];araG; L-arabinose transport system ATP-binding protein [EC:3.6.3.17]	283	36	21	13	1	113	1
K10538	ABC Transporters, Prokaryotic Type;Saccharide, polyol, and lipid transporters L-Arabinose transporter [MD:M00213] [OT];araH; L-arabinose transport system permease protein	156	39	21	16	0	91	0
K10108	ABC Transporters, Prokaryotic Type;Saccharide, polyol, and lipid transporters Maltose/maltodextrin transporter [MD:M00194] [OT];malE; maltose/maltodextrin transport system substrate-binding protein	241	0	16	8	3	0	4
K10109	ABC Transporters, Prokaryotic Type;Saccharide, polyol, and lipid transporters Maltose/maltodextrin transporter [MD:M00194] [OT];malF; maltose/maltodextrin transport system permease protein	268	0	21	9	0	0	6
K10110	ABC Transporters, Prokaryotic Type;Saccharide, polyol, and lipid transporters Maltose/maltodextrin transporter [MD:M00194] [OT];malG; maltose/maltodextrin transport system permease protein	184	0	14	4	6	0	8
K10111	ABC Transporters, Prokaryotic Type;Saccharide, polyol, and lipid transporters Maltose/maltodextrin transporter [MD:M00194] [OT];malK, mtlK, thuK; multiple sugar transport system ATP-binding protein [EC:3.6.3.-]	460	58	18	6	10	97	3
K10112	ABC Transporters, Prokaryotic Type;Saccharide, polyol, and lipid transporters Maltose/maltodextrin transporter [MD:M00194] [OT];msmX, msmK, malK, sugC, ggtA, msiK; multiple sugar transport system ATP-binding protein	100	38	14	0	2	38	5
K02067	ABC Transporters, Prokaryotic Type;Saccharide, polyol, and lipid transporters Mce system transporter [MD:M00670];mlaD, linM; phospholipid/cholesterol/gamma-HCH transport system substrate-binding protein	137	25	15	9	0	61	3
K02066	ABC Transporters, Prokaryotic Type;Saccharide, polyol, and lipid transporters Mce system transporter [MD:M00670];mlaE, linK; phospholipid/cholesterol/gamma-HCH transport system permease protein	180	33	10	13	4	72	3
K02065	ABC Transporters, Prokaryotic Type;Saccharide, polyol, and lipid transporters Mce system transporter [MD:M00670];mlaF, linL, mkl; phospholipid/cholesterol/gamma-HCH transport system ATP-binding protein	167	33	13	15	1	87	3
K10542	ABC Transporters, Prokaryotic Type;Saccharide, polyol, and lipid transporters Methyl-galactoside transporter [MD:M00214] [OT];mglA; methyl-galactoside transport system ATP-binding protein [EC:3.6.3.17]	250	0	19	19	6	0	5
K10540	ABC Transporters, Prokaryotic Type;Saccharide, polyol, and lipid transporters Methyl-galactoside transporter [MD:M00214] [OT];mglB; methyl-galactoside transport system substrate-binding protein	194	0	10	15	3	0	4
K10541	ABC Transporters, Prokaryotic Type;Saccharide, polyol, and lipid transporters Methyl-galactoside transporter [MD:M00214] [OT];mglC; methyl-galactoside transport system permease protein	168	0	15	13	5	0	4
K10547	ABC Transporters, Prokaryotic Type;Saccharide, polyol, and lipid transporters Multiple sugar transporter [MD:M00216] [OT];ABC.GGU.P, gguB; putative multiple sugar transport system permease protein	0	0	0	0	0	1	0
K10546	ABC Transporters, Prokaryotic Type;Saccharide, polyol, and lipid transporters Multiple sugar transporter [MD:M00216] [OT];ABC.GGU.S, chvE; putative multiple sugar transport system substrate-binding protein	0	0	0	0	0	2	0
K10112	ABC Transporters, Prokaryotic Type;Saccharide, polyol, and lipid transporters N,N'-Diacetylchitobiose transporter [MD:M00606] [OT];msmX, msmK, malK, sugC, ggtA, msiK; multiple sugar transport system ATP-binding protein	100	38	14	0	2	38	5
K10195	ABC Transporters, Prokaryotic Type;Saccharide, polyol, and lipid transporters Oligogalacturonide transporter [MD:M00202] [OT];togA; oligogalacturonide transport system ATP-binding protein	0	0	7	0	2	0	0
K10192	ABC Transporters, Prokaryotic Type;Saccharide, polyol, and lipid transporters Oligogalacturonide transporter [MD:M00202] [OT];togB; oligogalacturonide transport system substrate-binding protein	0	0	5	0	4	0	0
K10193	ABC Transporters, Prokaryotic Type;Saccharide, polyol, and lipid transporters Oligogalacturonide transporter [MD:M00202] [OT];togM; oligogalacturonide transport system permease protein	0	0	5	0	0	0	0
K10194	ABC Transporters, Prokaryotic Type;Saccharide, polyol, and lipid transporters Oligogalacturonide transporter [MD:M00202] [OT];togN; oligogalacturonide transport system permease protein	0	0	4	0	3	0	0
K07122	ABC Transporters, Prokaryotic Type;Saccharide, polyol, and lipid transporters Phospholipid transporter [MD:M00210];mlaB; phospholipid transport system transporter-binding protein	96	7	16	10	0	45	4
K07323	ABC Transporters, Prokaryotic Type;Saccharide, polyol, and lipid transporters Phospholipid transporter [MD:M00210];mlaC; phospholipid transport system substrate-binding protein	170	12	14	10	3	57	3
K02067	ABC Transporters, Prokaryotic Type;Saccharide, polyol, and lipid transporters Phospholipid transporter [MD:M00210];mlaD, linM; phospholipid/cholesterol/gamma-HCH transport system substrate-binding protein	137	25	15	9	0	61	3
K02066	ABC Transporters, Prokaryotic Type;Saccharide, polyol, and lipid transporters Phospholipid transporter [MD:M00210];mlaE, linK; phospholipid/cholesterol/gamma-HCH transport system permease protein	180	33	10	13	4	72	3
K02065	ABC Transporters, Prokaryotic Type;Saccharide, polyol, and lipid transporters Phospholipid transporter [MD:M00210];mlaF, linL, mkl; phospholipid/cholesterol/gamma-HCH transport system ATP-binding protein	167	33	13	15	1	87	3
K02068	ABC Transporters, Prokaryotic Type;Saccharide, polyol, and lipid transporters Putative ABC transporter [MD:M00211] [OT];ABC.X2.A; putative ABC transport system ATP-binding protein	118	18	11	9	0	4	8
K02069	ABC Transporters, Prokaryotic Type;Saccharide, polyol, and lipid transporters Putative ABC transporter [MD:M00211] [OT];ABC.X2.P; putative ABC transport system permease protein	113	24	10	9	4	8	4
K17319	ABC Transporters, Prokaryotic Type;Saccharide, polyol, and lipid transporters Putative aldouronate transporter [MD:M00603] [OT];lplB; putative aldouronate transport system permease protein	0	0	1	0	0	0	0
K10112	ABC Transporters, Prokaryotic Type;Saccharide, polyol, and lipid transporters Putative fructooligosaccharide transporter [MD:M00197] [OT];msmX, msmK, malK, sugC, ggtA, msiK; multiple sugar transport system ATP-binding protein	100	38	14	0	2	38	5
K02025	ABC Transporters, Prokaryotic Type;Saccharide, polyol, and lipid transporters Putative multiple sugar transporter [MD:M00207];ABC.MS.P; multiple sugar transport system permease protein	92	37	7	0	3	9	5
K02026	ABC Transporters, Prokaryotic Type;Saccharide, polyol, and lipid transporters Putative multiple sugar transporter [MD:M00207];ABC.MS.P1; multiple sugar transport system permease protein	85	41	10	0	2	13	3
K02027	ABC Transporters, Prokaryotic Type;Saccharide, polyol, and lipid transporters Putative multiple sugar transporter [MD:M00207];ABC.MS.S; multiple sugar transport system substrate-binding protein	109	53	15	0	2	16	6
K10111	ABC Transporters, Prokaryotic Type;Saccharide, polyol, and lipid transporters Putative multiple sugar transporter [MD:M00207];malK, mtlK, thuK; multiple sugar transport system ATP-binding protein [EC:3.6.3.-]	460	58	18	6	10	97	3
K10112	ABC Transporters, Prokaryotic Type;Saccharide, polyol, and lipid transporters Putative multiple sugar transporter [MD:M00207];msmX, msmK, malK, sugC, ggtA, msiK; multiple sugar transport system ATP-binding protein	100	38	14	0	2	38	5
K02056	ABC Transporters, Prokaryotic Type;Saccharide, polyol, and lipid transporters Putative simple sugar transporter [MD:M00221];ABC.SS.A; simple sugar transport system ATP-binding protein [EC:3.6.3.17]	1063	74	50	47	21	118	18
K02057	ABC Transporters, Prokaryotic Type;Saccharide, polyol, and lipid transporters Putative simple sugar transporter [MD:M00221];ABC.SS.P; simple sugar transport system permease protein	1166	80	57	59	33	201	26
K02058	ABC Transporters, Prokaryotic Type;Saccharide, polyol, and lipid transporters Putative simple sugar transporter [MD:M00221];ABC.SS.S; simple sugar transport system substrate-binding protein	579	68	30	33	10	21	13
K05814	ABC Transporters, Prokaryotic Type;Saccharide, polyol, and lipid transporters Putative sn-Glycerol 3-phosphate transporter [MD:M00198] [OT];ugpA; sn-glycerol 3-phosphate transport system permease protein	274	16	17	16	10	29	3
K05813	ABC Transporters, Prokaryotic Type;Saccharide, polyol, and lipid transporters Putative sn-Glycerol 3-phosphate transporter [MD:M00198] [OT];ugpB; sn-glycerol 3-phosphate transport system substrate-binding protein	424	18	40	32	7	37	5
K05816	ABC Transporters, Prokaryotic Type;Saccharide, polyol, and lipid transporters Putative sn-Glycerol 3-phosphate transporter [MD:M00198] [OT];ugpC; sn-glycerol 3-phosphate transport system ATP-binding protein [EC:3.6.3.20]	386	26	25	34	4	32	5
K05815	ABC Transporters, Prokaryotic Type;Saccharide, polyol, and lipid transporters Putative sn-Glycerol 3-phosphate transporter [MD:M00198] [OT];ugpE; sn-glycerol 3-phosphate transport system permease protein	292	9	28	14	5	28	8
K10111	ABC Transporters, Prokaryotic Type;Saccharide, polyol, and lipid transporters Putative sorbitol/mannitol transporter [MD:M00200] [OT];malK, mtlK, thuK; multiple sugar transport system ATP-binding protein [EC:3.6.3.-]	460	58	18	6	10	97	3
K10112	ABC Transporters, Prokaryotic Type;Saccharide, polyol, and lipid transporters Putative sorbitol/mannitol transporter [MD:M00200] [OT];msmX, msmK, malK, sugC, ggtA, msiK; multiple sugar transport system ATP-binding protein	100	38	14	0	2	38	5
K10227	ABC Transporters, Prokaryotic Type;Saccharide, polyol, and lipid transporters Putative sorbitol/mannitol transporter [MD:M00200] [OT];smoE, mtlE; sorbitol/mannitol transport system substrate-binding protein	4	35	0	0	0	119	0
K10228	ABC Transporters, Prokaryotic Type;Saccharide, polyol, and lipid transporters Putative sorbitol/mannitol transporter [MD:M00200] [OT];smoF, mtlF; sorbitol/mannitol transport system permease protein	0	19	0	0	0	66	0
K10229	ABC Transporters, Prokaryotic Type;Saccharide, polyol, and lipid transporters Putative sorbitol/mannitol transporter [MD:M00200] [OT];smoG, mtlG; sorbitol/mannitol transport system permease protein	0	14	0	0	0	62	0
K17207	ABC Transporters, Prokaryotic Type;Saccharide, polyol, and lipid transporters Putative xylitol transporter [MD:M00591] [OT];xltA; putative xylitol transport system ATP-binding protein	37	0	0	0	0	4	4
K17206	ABC Transporters, Prokaryotic Type;Saccharide, polyol, and lipid transporters Putative xylitol transporter [MD:M00591] [OT];xltB; putative xylitol transport system permease protein	27	4	0	0	0	8	6
K17205	ABC Transporters, Prokaryotic Type;Saccharide, polyol, and lipid transporters Putative xylitol transporter [MD:M00591] [OT];xltC; putative xylitol transport system substrate-binding protein	30	2	0	0	0	8	3
K10117	ABC Transporters, Prokaryotic Type;Saccharide, polyol, and lipid transporters Raffinose/stachyose/melibiose transporter [MD:M00196] [OT];msmE; raffinose/stachyose/melibiose transport system substrate-binding protein	237	3	3	0	0	0	0
K10118	ABC Transporters, Prokaryotic Type;Saccharide, polyol, and lipid transporters Raffinose/stachyose/melibiose transporter [MD:M00196] [OT];msmF; raffinose/stachyose/melibiose transport system permease protein	174	1	2	0	0	0	0
K10119	ABC Transporters, Prokaryotic Type;Saccharide, polyol, and lipid transporters Raffinose/stachyose/melibiose transporter [MD:M00196] [OT];msmG; raffinose/stachyose/melibiose transport system permease protein	143	2	2	0	0	0	0
K10112	ABC Transporters, Prokaryotic Type;Saccharide, polyol, and lipid transporters Raffinose/stachyose/melibiose transporter [MD:M00196] [OT];msmX, msmK, malK, sugC, ggtA, msiK; multiple sugar transport system ATP-binding protein	100	38	14	0	2	38	5
K10560	ABC Transporters, Prokaryotic Type;Saccharide, polyol, and lipid transporters Rhamnose transporter [MD:M00220] [OT];rhaP; rhamnose transport system permease protein	1	2	9	0	6	0	0
K10561	ABC Transporters, Prokaryotic Type;Saccharide, polyol, and lipid transporters Rhamnose transporter [MD:M00220] [OT];rhaQ; rhamnose transport system permease protein	0	3	9	0	2	0	0
K10559	ABC Transporters, Prokaryotic Type;Saccharide, polyol, and lipid transporters Rhamnose transporter [MD:M00220] [OT];rhaS; rhamnose transport system substrate-binding protein	10	2	11	0	1	0	0
K10562	ABC Transporters, Prokaryotic Type;Saccharide, polyol, and lipid transporters Rhamnose transporter [MD:M00220] [OT];rhaT; rhamnose transport system ATP-binding protein [EC:3.6.3.17]	0	3	12	0	6	0	0
K10441	ABC Transporters, Prokaryotic Type;Saccharide, polyol, and lipid transporters Ribose transporter [MD:M00212] [OT];rbsA; ribose transport system ATP-binding protein [EC:3.6.3.17]	889	196	41	32	9	350	7
K10439	ABC Transporters, Prokaryotic Type;Saccharide, polyol, and lipid transporters Ribose transporter [MD:M00212] [OT];rbsB; ribose transport system substrate-binding protein	838	158	32	26	18	310	15
K10440	ABC Transporters, Prokaryotic Type;Saccharide, polyol, and lipid transporters Ribose transporter [MD:M00212] [OT];rbsC; ribose transport system permease protein	630	179	28	27	11	279	10
K10111	ABC Transporters, Prokaryotic Type;Saccharide, polyol, and lipid transporters Trehalose/maltose transporter [MD:M00204] [OT];malK, mtlK, thuK; multiple sugar transport system ATP-binding protein [EC:3.6.3.-]	460	58	18	6	10	97	3
K10236	ABC Transporters, Prokaryotic Type;Saccharide, polyol, and lipid transporters Trehalose/maltose transporter [MD:M00204] [OT];thuE; trehalose/maltose transport system substrate-binding protein	0	1	0	0	0	3	0
K10237	ABC Transporters, Prokaryotic Type;Saccharide, polyol, and lipid transporters Trehalose/maltose transporter [MD:M00204] [OT];thuF, sugA; trehalose/maltose transport system permease protein	0	2	0	0	0	3	0
K10238	ABC Transporters, Prokaryotic Type;Saccharide, polyol, and lipid transporters Trehalose/maltose transporter [MD:M00204] [OT];thuG, sugB; trehalose/maltose transport system permease protein	0	2	0	0	0	4	0
K03781	Aging;04211 Longevity regulating pathway - mammal [PATH:ko04211];katE, CAT, catB, srpA; catalase [EC:1.11.1.6]	533	92	40	31	6	337	4
K04564	Aging;04211 Longevity regulating pathway - mammal [PATH:ko04211];SOD2; superoxide dismutase, Fe-Mn family [EC:1.15.1.1]	172	24	18	15	8	60	6
K01358	Aging;04212 Longevity regulating pathway - worm [PATH:ko04212];clpP, CLPP; ATP-dependent Clp protease, protease subunit [EC:3.4.21.92]	238	16	20	21	5	95	7
K04043	Aging;04212 Longevity regulating pathway - worm [PATH:ko04212];dnaK; molecular chaperone DnaK	334	52	35	24	1	128	4
K04077	Aging;04212 Longevity regulating pathway - worm [PATH:ko04212];groEL, HSPD1; chaperonin GroEL	252	67	26	19	7	131	3
K03781	Aging;04212 Longevity regulating pathway - worm [PATH:ko04212];katE, CAT, catB, srpA; catalase [EC:1.11.1.6]	533	92	40	31	6	337	4
K00507	Aging;04212 Longevity regulating pathway - worm [PATH:ko04212];SCD, desC; stearoyl-CoA desaturase (Delta-9 desaturase) [EC:1.14.19.1]	0	39	0	0	0	1	0
K04564	Aging;04212 Longevity regulating pathway - worm [PATH:ko04212];SOD2; superoxide dismutase, Fe-Mn family [EC:1.15.1.1]	172	24	18	15	8	60	6
K03695	Aging;04213 Longevity regulating pathway - multiple species [PATH:ko04213];clpB; ATP-dependent Clp protease ATP-binding subunit ClpB	378	58	26	25	11	160	0
K01768	Aging;04213 Longevity regulating pathway - multiple species [PATH:ko04213];E4.6.1.1; adenylate cyclase [EC:4.6.1.1]	0	60	0	0	0	96	0
K03781	Aging;04213 Longevity regulating pathway - multiple species [PATH:ko04213];katE, CAT, catB, srpA; catalase [EC:1.11.1.6]	533	92	40	31	6	337	4
K04565	Aging;04213 Longevity regulating pathway - multiple species [PATH:ko04213];SOD1; superoxide dismutase, Cu-Zn family [EC:1.15.1.1]	189	13	11	3	1	59	3
K04564	Aging;04213 Longevity regulating pathway - multiple species [PATH:ko04213];SOD2; superoxide dismutase, Fe-Mn family [EC:1.15.1.1]	172	24	18	15	8	60	6
K14260	Amino acid metabolism;00220 Arginine biosynthesis [PATH:ko00220];alaA; alanine-synthesizing transaminase [EC:2.6.1.66 2.6.1.2]	197	21	21	21	1	66	3
K01478	Amino acid metabolism;00220 Arginine biosynthesis [PATH:ko00220];arcA; arginine deiminase [EC:3.5.3.6]	2	5	11	0	0	0	1
K00926	Amino acid metabolism;00220 Arginine biosynthesis [PATH:ko00220];arcC; carbamate kinase [EC:2.7.2.2]	1	2	27	12	0	0	3
K00619	Amino acid metabolism;00220 Arginine biosynthesis [PATH:ko00220];argA; amino-acid N-acetyltransferase [EC:2.3.1.1]	0	5	0	0	0	0	0
K14682	Amino acid metabolism;00220 Arginine biosynthesis [PATH:ko00220];argAB; amino-acid N-acetyltransferase [EC:2.3.1.1]	221	16	17	19	2	104	8
K00930	Amino acid metabolism;00220 Arginine biosynthesis [PATH:ko00220];argB; acetylglutamate kinase [EC:2.7.2.8]	155	42	14	13	1	87	4
K00145	Amino acid metabolism;00220 Arginine biosynthesis [PATH:ko00220];argC; N-acetyl-gamma-glutamyl-phosphate reductase [EC:1.2.1.38]	210	42	19	13	3	113	3
K00821	Amino acid metabolism;00220 Arginine biosynthesis [PATH:ko00220];argD; acetylornithine/N-succinyldiaminopimelate aminotransferase [EC:2.6.1.11 2.6.1.17]	290	41	19	16	2	98	3
K01438	Amino acid metabolism;00220 Arginine biosynthesis [PATH:ko00220];argE; acetylornithine deacetylase [EC:3.5.1.16]	495	57	29	15	13	271	4
K01940	Amino acid metabolism;00220 Arginine biosynthesis [PATH:ko00220];argG, ASS1; argininosuccinate synthase [EC:6.3.4.5]	259	39	24	29	1	68	3
K01755	Amino acid metabolism;00220 Arginine biosynthesis [PATH:ko00220];argH, ASL; argininosuccinate lyase [EC:4.3.2.1]	249	47	18	34	4	202	4
K00620	Amino acid metabolism;00220 Arginine biosynthesis [PATH:ko00220];argJ; glutamate N-acetyltransferase / amino-acid N-acetyltransferase [EC:2.3.1.35 2.3.1.1]	0	23	0	0	0	103	0
K00812	Amino acid metabolism;00220 Arginine biosynthesis [PATH:ko00220];aspB; aspartate aminotransferase [EC:2.6.1.1]	64	16	6	11	8	99	10
K00813	Amino acid metabolism;00220 Arginine biosynthesis [PATH:ko00220];aspC; aspartate aminotransferase [EC:2.6.1.1]	236	0	16	20	5	0	5
K05597	Amino acid metabolism;00220 Arginine biosynthesis [PATH:ko00220];aspQ, ansB, ansA; glutamin-(asparagin-)ase [EC:3.5.1.38]	0	2	0	0	0	3	0
K01457	Amino acid metabolism;00220 Arginine biosynthesis [PATH:ko00220];atzF; allophanate hydrolase [EC:3.5.1.54]	340	10	7	3	3	90	3
K00262	Amino acid metabolism;00220 Arginine biosynthesis [PATH:ko00220];E1.4.1.4, gdhA; glutamate dehydrogenase (NADP+) [EC:1.4.1.4]	1	0	16	2	0	1	3
K00818	Amino acid metabolism;00220 Arginine biosynthesis [PATH:ko00220];E2.6.1.11, argD; acetylornithine aminotransferase [EC:2.6.1.11]	0	2	0	0	0	13	0
K01476	Amino acid metabolism;00220 Arginine biosynthesis [PATH:ko00220];E3.5.3.1, rocF, arg; arginase [EC:3.5.3.1]	7	14	11	1	2	8	5
K01941	Amino acid metabolism;00220 Arginine biosynthesis [PATH:ko00220];E6.3.4.6; urea carboxylase [EC:6.3.4.6]	1243	29	16	4	28	133	6
K15371	Amino acid metabolism;00220 Arginine biosynthesis [PATH:ko00220];GDH2; glutamate dehydrogenase [EC:1.4.1.2]	1	47	0	0	0	259	0
K01915	Amino acid metabolism;00220 Arginine biosynthesis [PATH:ko00220];glnA, GLUL; glutamine synthetase [EC:6.3.1.2]	248	91	14	22	9	456	13
K01425	Amino acid metabolism;00220 Arginine biosynthesis [PATH:ko00220];glsA, GLS; glutaminase [EC:3.5.1.2]	206	20	25	0	1	80	4
K00261	Amino acid metabolism;00220 Arginine biosynthesis [PATH:ko00220];GLUD1_2, gdhA; glutamate dehydrogenase (NAD(P)+) [EC:1.4.1.3]	214	21	19	16	5	0	11
K00611	Amino acid metabolism;00220 Arginine biosynthesis [PATH:ko00220];OTC, argF, argI; ornithine carbamoyltransferase [EC:2.1.3.3]	268	4	43	11	3	63	3
K01430	Amino acid metabolism;00220 Arginine biosynthesis [PATH:ko00220];ureA; urease subunit gamma [EC:3.5.1.5]	0	14	8	0	1	36	3
K01429	Amino acid metabolism;00220 Arginine biosynthesis [PATH:ko00220];ureB; urease subunit beta [EC:3.5.1.5]	0	9	7	0	0	43	3
K01428	Amino acid metabolism;00220 Arginine biosynthesis [PATH:ko00220];ureC; urease subunit alpha [EC:3.5.1.5]	1	41	15	0	3	154	3
K00830	Amino acid metabolism;00250 Alanine, aspartate and glutamate metabolism [PATH:ko00250];AGXT; alanine-glyoxylate transaminase / serine-glyoxylate transaminase / serine-pyruvate transaminase [EC:2.6.1.44 2.6.1.45 2.6.1.51]	0	5	0	0	0	18	0
K14260	Amino acid metabolism;00250 Alanine, aspartate and glutamate metabolism [PATH:ko00250];alaA; alanine-synthesizing transaminase [EC:2.6.1.66 2.6.1.2]	197	21	21	21	1	66	3
K00259	Amino acid metabolism;00250 Alanine, aspartate and glutamate metabolism [PATH:ko00250];ald; alanine dehydrogenase [EC:1.4.1.1]	0	16	0	0	0	0	0
K01940	Amino acid metabolism;00250 Alanine, aspartate and glutamate metabolism [PATH:ko00250];argG, ASS1; argininosuccinate synthase [EC:6.3.4.5]	259	39	24	29	1	68	3
K01755	Amino acid metabolism;00250 Alanine, aspartate and glutamate metabolism [PATH:ko00250];argH, ASL; argininosuccinate lyase [EC:4.3.2.1]	249	47	18	34	4	202	4
K09758	Amino acid metabolism;00250 Alanine, aspartate and glutamate metabolism [PATH:ko00250];asdA; aspartate 4-decarboxylase [EC:4.1.1.12]	0	1	0	0	0	22	0
K01914	Amino acid metabolism;00250 Alanine, aspartate and glutamate metabolism [PATH:ko00250];asnA; aspartate--ammonia ligase [EC:6.3.1.1]	0	0	12	0	9	0	3
K01953	Amino acid metabolism;00250 Alanine, aspartate and glutamate metabolism [PATH:ko00250];asnB, ASNS; asparagine synthase (glutamine-hydrolysing) [EC:6.3.5.4]	288	31	18	42	6	129	8
K01744	Amino acid metabolism;00250 Alanine, aspartate and glutamate metabolism [PATH:ko00250];aspA; aspartate ammonia-lyase [EC:4.3.1.1]	287	21	38	26	6	149	3
K00812	Amino acid metabolism;00250 Alanine, aspartate and glutamate metabolism [PATH:ko00250];aspB; aspartate aminotransferase [EC:2.6.1.1]	64	16	6	11	8	99	10
K00813	Amino acid metabolism;00250 Alanine, aspartate and glutamate metabolism [PATH:ko00250];aspC; aspartate aminotransferase [EC:2.6.1.1]	236	0	16	20	5	0	5
K05597	Amino acid metabolism;00250 Alanine, aspartate and glutamate metabolism [PATH:ko00250];aspQ, ansB, ansA; glutamin-(asparagin-)ase [EC:3.5.1.38]	0	2	0	0	0	3	0
K01956	Amino acid metabolism;00250 Alanine, aspartate and glutamate metabolism [PATH:ko00250];carA, CPA1; carbamoyl-phosphate synthase small subunit [EC:6.3.5.5]	227	16	20	21	2	90	6
K01955	Amino acid metabolism;00250 Alanine, aspartate and glutamate metabolism [PATH:ko00250];carB, CPA2; carbamoyl-phosphate synthase large subunit [EC:6.3.5.5]	455	78	37	26	2	228	7
K14268	Amino acid metabolism;00250 Alanine, aspartate and glutamate metabolism [PATH:ko00250];davT, gabT; 5-aminovalerate/4-aminobutyrate aminotransferase [EC:2.6.1.48 2.6.1.19]	0	0	0	0	0	105	0
K00294	Amino acid metabolism;00250 Alanine, aspartate and glutamate metabolism [PATH:ko00250];E1.2.1.88; 1-pyrroline-5-carboxylate dehydrogenase [EC:1.2.1.88]	0	1	0	0	0	0	0
K00262	Amino acid metabolism;00250 Alanine, aspartate and glutamate metabolism [PATH:ko00250];E1.4.1.4, gdhA; glutamate dehydrogenase (NADP+) [EC:1.4.1.4]	1	0	16	2	0	1	3
K01424	Amino acid metabolism;00250 Alanine, aspartate and glutamate metabolism [PATH:ko00250];E3.5.1.1, ansA, ansB; L-asparaginase [EC:3.5.1.1]	174	26	16	11	4	93	8
K01580	Amino acid metabolism;00250 Alanine, aspartate and glutamate metabolism [PATH:ko00250];E4.1.1.15, gadB, gadA, GAD; glutamate decarboxylase [EC:4.1.1.15]	0	1	0	0	0	0	0
K00135	Amino acid metabolism;00250 Alanine, aspartate and glutamate metabolism [PATH:ko00250];gabD; succinate-semialdehyde dehydrogenase / glutarate-semialdehyde dehydrogenase [EC:1.2.1.16 1.2.1.79 1.2.1.20]	926	143	64	40	0	248	24
K07250	Amino acid metabolism;00250 Alanine, aspartate and glutamate metabolism [PATH:ko00250];gabT; 4-aminobutyrate aminotransferase / (S)-3-amino-2-methylpropionate transaminase [EC:2.6.1.19 2.6.1.22]	282	1	3	16	0	41	1
K15371	Amino acid metabolism;00250 Alanine, aspartate and glutamate metabolism [PATH:ko00250];GDH2; glutamate dehydrogenase [EC:1.4.1.2]	1	47	0	0	0	259	0
K00820	Amino acid metabolism;00250 Alanine, aspartate and glutamate metabolism [PATH:ko00250];glmS, GFPT; glucosamine--fructose-6-phosphate aminotransferase (isomerizing) [EC:2.6.1.16]	274	122	26	12	10	230	6
K01915	Amino acid metabolism;00250 Alanine, aspartate and glutamate metabolism [PATH:ko00250];glnA, GLUL; glutamine synthetase [EC:6.3.1.2]	248	91	14	22	9	456	13
K01425	Amino acid metabolism;00250 Alanine, aspartate and glutamate metabolism [PATH:ko00250];glsA, GLS; glutaminase [EC:3.5.1.2]	206	20	25	0	1	80	4
K00265	Amino acid metabolism;00250 Alanine, aspartate and glutamate metabolism [PATH:ko00250];gltB; glutamate synthase (NADPH/NADH) large chain [EC:1.4.1.13 1.4.1.14]	968	31	40	45	14	271	9
K00266	Amino acid metabolism;00250 Alanine, aspartate and glutamate metabolism [PATH:ko00250];gltD; glutamate synthase (NADPH/NADH) small chain [EC:1.4.1.13 1.4.1.14]	34	51	18	1	2	82	4
K00261	Amino acid metabolism;00250 Alanine, aspartate and glutamate metabolism [PATH:ko00250];GLUD1_2, gdhA; glutamate dehydrogenase (NAD(P)+) [EC:1.4.1.3]	214	21	19	16	5	0	11
K00278	Amino acid metabolism;00250 Alanine, aspartate and glutamate metabolism [PATH:ko00250];nadB; L-aspartate oxidase [EC:1.4.3.16]	311	26	23	18	5	130	6
K16871	Amino acid metabolism;00250 Alanine, aspartate and glutamate metabolism [PATH:ko00250];POP2; 4-aminobutyrate---pyruvate transaminase [EC:2.6.1.96]	0	3	0	0	0	4	0
K01939	Amino acid metabolism;00250 Alanine, aspartate and glutamate metabolism [PATH:ko00250];purA, ADSS; adenylosuccinate synthase [EC:6.3.4.4]	236	44	16	18	9	114	7
K01756	Amino acid metabolism;00250 Alanine, aspartate and glutamate metabolism [PATH:ko00250];purB, ADSL; adenylosuccinate lyase [EC:4.3.2.2]	241	37	18	20	5	100	8
K00764	Amino acid metabolism;00250 Alanine, aspartate and glutamate metabolism [PATH:ko00250];purF, PPAT; amidophosphoribosyltransferase [EC:2.4.2.14]	261	36	30	19	4	94	6
K13821	Amino acid metabolism;00250 Alanine, aspartate and glutamate metabolism [PATH:ko00250];putA; RHH-type transcriptional regulator, proline utilization regulon repressor / proline dehydrogenase / delta 1-pyrroline-5-carboxylate dehydrogenase [EC:1.5.5.2 1.2.1.88]	592	70	59	26	3	244	8
K00823	Amino acid metabolism;00250 Alanine, aspartate and glutamate metabolism [PATH:ko00250];puuE; 4-aminobutyrate aminotransferase [EC:2.6.1.19]	253	20	20	7	3	3	3
K00609	Amino acid metabolism;00250 Alanine, aspartate and glutamate metabolism [PATH:ko00250];pyrB, PYR2; aspartate carbamoyltransferase catalytic subunit [EC:2.1.3.2]	217	46	14	12	0	83	6
K00610	Amino acid metabolism;00250 Alanine, aspartate and glutamate metabolism [PATH:ko00250];pyrI; aspartate carbamoyltransferase regulatory subunit	121	0	10	18	9	0	3
K01779	Amino acid metabolism;00250 Alanine, aspartate and glutamate metabolism [PATH:ko00250];racD; aspartate racemase [EC:5.1.1.13]	159	41	2	0	0	65	3
K08324	Amino acid metabolism;00250 Alanine, aspartate and glutamate metabolism [PATH:ko00250];sad; succinate-semialdehyde dehydrogenase [EC:1.2.1.16 1.2.1.24]	274	16	20	21	1	29	0
K00830	Amino acid metabolism;00260 Glycine, serine and threonine metabolism [PATH:ko00260];AGXT; alanine-glyoxylate transaminase / serine-glyoxylate transaminase / serine-pyruvate transaminase [EC:2.6.1.44 2.6.1.45 2.6.1.51]	0	5	0	0	0	18	0
K00276	Amino acid metabolism;00260 Glycine, serine and threonine metabolism [PATH:ko00260];AOC3, AOC2, tynA; primary-amine oxidase [EC:1.4.3.21]	2	0	11	0	1	17	0
K00133	Amino acid metabolism;00260 Glycine, serine and threonine metabolism [PATH:ko00260];asd; aspartate-semialdehyde dehydrogenase [EC:1.2.1.11]	228	24	16	19	4	79	4
K00108	Amino acid metabolism;00260 Glycine, serine and threonine metabolism [PATH:ko00260];betA, CHDH; choline dehydrogenase [EC:1.1.99.1]	334	120	31	12	0	208	7
K00130	Amino acid metabolism;00260 Glycine, serine and threonine metabolism [PATH:ko00260];betB, gbsA; betaine-aldehyde dehydrogenase [EC:1.2.1.8]	303	179	31	17	3	175	4
K01697	Amino acid metabolism;00260 Glycine, serine and threonine metabolism [PATH:ko00260];CBS; cystathionine beta-synthase [EC:4.2.1.22]	0	0	17	0	0	21	22
K17103	Amino acid metabolism;00260 Glycine, serine and threonine metabolism [PATH:ko00260];CHO1, pssA; CDP-diacylglycerol---serine O-phosphatidyltransferase [EC:2.7.8.8]	0	22	8	0	0	72	1
K00499	Amino acid metabolism;00260 Glycine, serine and threonine metabolism [PATH:ko00260];CMO; choline monooxygenase [EC:1.14.15.7]	0	22	0	0	0	10	0
K01758	Amino acid metabolism;00260 Glycine, serine and threonine metabolism [PATH:ko00260];CTH; cystathionine gamma-lyase [EC:4.4.1.1]	2	0	10	0	1	14	4
K13745	Amino acid metabolism;00260 Glycine, serine and threonine metabolism [PATH:ko00260];ddc; L-2,4-diaminobutyrate decarboxylase [EC:4.1.1.86]	500	0	22	9	0	0	7
K00382	Amino acid metabolism;00260 Glycine, serine and threonine metabolism [PATH:ko00260];DLD, lpd, pdhD; dihydrolipoamide dehydrogenase [EC:1.8.1.4]	228	108	22	11	10	316	12
K15786	Amino acid metabolism;00260 Glycine, serine and threonine metabolism [PATH:ko00260];doeC; aspartate-semialdehyde dehydrogenase [EC:1.2.1.-]	0	4	0	0	0	0	0
K15785	Amino acid metabolism;00260 Glycine, serine and threonine metabolism [PATH:ko00260];doeD; L-2,4-diaminobutyrate transaminase [EC:2.6.1.76]	0	6	0	0	0	6	0
K01753	Amino acid metabolism;00260 Glycine, serine and threonine metabolism [PATH:ko00260];dsdA; D-serine dehydratase [EC:4.3.1.18]	155	29	18	2	3	9	8
K00003	Amino acid metabolism;00260 Glycine, serine and threonine metabolism [PATH:ko00260];E1.1.1.3; homoserine dehydrogenase [EC:1.1.1.3]	0	33	0	0	0	93	0
K00301	Amino acid metabolism;00260 Glycine, serine and threonine metabolism [PATH:ko00260];E1.5.3.1; sarcosine oxidase [EC:1.5.3.1]	4	19	0	0	0	20	0
K00643	Amino acid metabolism;00260 Glycine, serine and threonine metabolism [PATH:ko00260];E2.3.1.37, ALAS; 5-aminolevulinate synthase [EC:2.3.1.37]	8	8	0	0	1	9	3
K08688	Amino acid metabolism;00260 Glycine, serine and threonine metabolism [PATH:ko00260];E3.5.3.3; creatinase [EC:3.5.3.3]	0	2	0	0	0	0	0
K01752	Amino acid metabolism;00260 Glycine, serine and threonine metabolism [PATH:ko00260];E4.3.1.17, sdaA, sdaB, tdcG; L-serine dehydratase [EC:4.3.1.17]	299	36	38	8	1	132	16
K01754	Amino acid metabolism;00260 Glycine, serine and threonine metabolism [PATH:ko00260];E4.3.1.19, ilvA, tdcB; threonine dehydratase [EC:4.3.1.19]	463	81	30	17	6	305	9
K00836	Amino acid metabolism;00260 Glycine, serine and threonine metabolism [PATH:ko00260];ectB, dat; diaminobutyrate-2-oxoglutarate transaminase [EC:2.6.1.76]	184	10	15	5	0	143	18
K06720	Amino acid metabolism;00260 Glycine, serine and threonine metabolism [PATH:ko00260];ectC; L-ectoine synthase [EC:4.2.1.108]	0	8	0	0	0	0	0
K00613	Amino acid metabolism;00260 Glycine, serine and threonine metabolism [PATH:ko00260];GATM; glycine amidinotransferase [EC:2.1.4.1]	13	0	0	0	0	14	0
K02437	Amino acid metabolism;00260 Glycine, serine and threonine metabolism [PATH:ko00260];gcvH, GCSH; glycine cleavage system H protein	121	21	16	12	5	104	3
K00282	Amino acid metabolism;00260 Glycine, serine and threonine metabolism [PATH:ko00260];gcvPA; glycine dehydrogenase subunit 1 [EC:1.4.4.2]	0	0	0	0	0	9	0
K00283	Amino acid metabolism;00260 Glycine, serine and threonine metabolism [PATH:ko00260];gcvPB; glycine dehydrogenase subunit 2 [EC:1.4.4.2]	0	0	0	0	0	11	0
K00605	Amino acid metabolism;00260 Glycine, serine and threonine metabolism [PATH:ko00260];gcvT, AMT; aminomethyltransferase [EC:2.1.2.10]	212	23	10	17	4	147	8
K12972	Amino acid metabolism;00260 Glycine, serine and threonine metabolism [PATH:ko00260];ghrA; glyoxylate/hydroxypyruvate reductase A [EC:1.1.1.79 1.1.1.81]	401	51	15	21	2	36	6
K00281	Amino acid metabolism;00260 Glycine, serine and threonine metabolism [PATH:ko00260];GLDC, gcvP; glycine dehydrogenase [EC:1.4.4.2]	523	68	36	24	5	225	8
K00865	Amino acid metabolism;00260 Glycine, serine and threonine metabolism [PATH:ko00260];glxK, garK; glycerate 2-kinase [EC:2.7.1.165]	239	22	32	9	13	80	6
K00600	Amino acid metabolism;00260 Glycine, serine and threonine metabolism [PATH:ko00260];glyA, SHMT; glycine hydroxymethyltransferase [EC:2.1.2.1]	323	89	8	36	5	224	21
K15634	Amino acid metabolism;00260 Glycine, serine and threonine metabolism [PATH:ko00260];gpmB; probable phosphoglycerate mutase [EC:5.4.2.12]	264	22	19	13	6	35	9
K15633	Amino acid metabolism;00260 Glycine, serine and threonine metabolism [PATH:ko00260];gpmI; 2,3-bisphosphoglycerate-independent phosphoglycerate mutase [EC:5.4.2.12]	0	0	20	0	5	28	4
K18896	Amino acid metabolism;00260 Glycine, serine and threonine metabolism [PATH:ko00260];gsmt; glycine/sarcosine N-methyltransferase [EC:2.1.1.156]	0	0	0	0	0	8	0
K15919	Amino acid metabolism;00260 Glycine, serine and threonine metabolism [PATH:ko00260];HPR2; hydroxypyruvate reductase 2	0	0	0	0	0	1	0
K00018	Amino acid metabolism;00260 Glycine, serine and threonine metabolism [PATH:ko00260];hprA; glycerate dehydrogenase [EC:1.1.1.29]	199	13	4	0	1	96	0
K00639	Amino acid metabolism;00260 Glycine, serine and threonine metabolism [PATH:ko00260];kbl, GCAT; glycine C-acetyltransferase [EC:2.3.1.29]	311	11	14	2	6	0	6
K01620	Amino acid metabolism;00260 Glycine, serine and threonine metabolism [PATH:ko00260];ltaE; threonine aldolase [EC:4.1.2.48]	229	22	13	12	0	157	4
K00928	Amino acid metabolism;00260 Glycine, serine and threonine metabolism [PATH:ko00260];lysC; aspartate kinase [EC:2.7.2.4]	273	35	22	17	1	84	4
K00274	Amino acid metabolism;00260 Glycine, serine and threonine metabolism [PATH:ko00260];MAO, aofH; monoamine oxidase [EC:1.4.3.4]	0	10	0	0	0	145	0
K12525	Amino acid metabolism;00260 Glycine, serine and threonine metabolism [PATH:ko00260];metL; bifunctional aspartokinase / homoserine dehydrogenase 2 [EC:2.7.2.4 1.1.1.3]	433	0	31	20	11	0	3
K01834	Amino acid metabolism;00260 Glycine, serine and threonine metabolism [PATH:ko00260];PGAM, gpmA; 2,3-bisphosphoglycerate-dependent phosphoglycerate mutase [EC:5.4.2.11]	133	22	13	18	0	77	3
K00998	Amino acid metabolism;00260 Glycine, serine and threonine metabolism [PATH:ko00260];pssA; CDP-diacylglycerol---serine O-phosphatidyltransferase [EC:2.7.8.8]	218	0	25	13	0	16	4
K17989	Amino acid metabolism;00260 Glycine, serine and threonine metabolism [PATH:ko00260];SDS, SDH, CHA1; L-serine/L-threonine ammonia-lyase [EC:4.3.1.17 4.3.1.19]	85	18	5	14	3	2	7
K00058	Amino acid metabolism;00260 Glycine, serine and threonine metabolism [PATH:ko00260];serA, PHGDH; D-3-phosphoglycerate dehydrogenase [EC:1.1.1.95]	856	66	39	36	2	252	8
K01079	Amino acid metabolism;00260 Glycine, serine and threonine metabolism [PATH:ko00260];serB, PSPH; phosphoserine phosphatase [EC:3.1.3.3]	235	22	11	13	5	84	5
K00831	Amino acid metabolism;00260 Glycine, serine and threonine metabolism [PATH:ko00260];serC, PSAT1; phosphoserine aminotransferase [EC:2.6.1.52]	186	30	20	23	3	73	4
K00302	Amino acid metabolism;00260 Glycine, serine and threonine metabolism [PATH:ko00260];soxA; sarcosine oxidase, subunit alpha [EC:1.5.3.1]	309	49	0	0	0	263	6
K00303	Amino acid metabolism;00260 Glycine, serine and threonine metabolism [PATH:ko00260];soxB; sarcosine oxidase, subunit beta [EC:1.5.3.1]	152	47	0	0	0	276	0
K00304	Amino acid metabolism;00260 Glycine, serine and threonine metabolism [PATH:ko00260];soxD; sarcosine oxidase, subunit delta [EC:1.5.3.1]	48	11	0	0	0	60	12
K00305	Amino acid metabolism;00260 Glycine, serine and threonine metabolism [PATH:ko00260];soxG; sarcosine oxidase, subunit gamma [EC:1.5.3.1]	84	23	0	0	0	71	1
K00060	Amino acid metabolism;00260 Glycine, serine and threonine metabolism [PATH:ko00260];tdh; threonine 3-dehydrogenase [EC:1.1.1.103]	251	16	12	1	3	0	4
K12524	Amino acid metabolism;00260 Glycine, serine and threonine metabolism [PATH:ko00260];thrA; bifunctional aspartokinase / homoserine dehydrogenase 1 [EC:2.7.2.4 1.1.1.3]	442	0	25	18	10	0	5
K00872	Amino acid metabolism;00260 Glycine, serine and threonine metabolism [PATH:ko00260];thrB1; homoserine kinase [EC:2.7.1.39]	217	0	17	13	3	0	5
K02204	Amino acid metabolism;00260 Glycine, serine and threonine metabolism [PATH:ko00260];thrB2; homoserine kinase type II [EC:2.7.1.39]	0	16	0	0	0	84	0
K01733	Amino acid metabolism;00260 Glycine, serine and threonine metabolism [PATH:ko00260];thrC; threonine synthase [EC:4.2.3.1]	270	36	23	19	1	131	7
K02203	Amino acid metabolism;00260 Glycine, serine and threonine metabolism [PATH:ko00260];thrH; phosphoserine / homoserine phosphotransferase [EC:3.1.3.3 2.7.1.39]	0	0	0	0	0	1	0
K01695	Amino acid metabolism;00260 Glycine, serine and threonine metabolism [PATH:ko00260];trpA; tryptophan synthase alpha chain [EC:4.2.1.20]	189	13	13	6	1	87	6
K01696	Amino acid metabolism;00260 Glycine, serine and threonine metabolism [PATH:ko00260];trpB; tryptophan synthase beta chain [EC:4.2.1.20]	227	27	8	17	6	102	5
K00050	Amino acid metabolism;00260 Glycine, serine and threonine metabolism [PATH:ko00260];ttuD; hydroxypyruvate reductase [EC:1.1.1.81]	43	0	0	1	1	0	6
K16066	Amino acid metabolism;00260 Glycine, serine and threonine metabolism [PATH:ko00260];ydfG; 3-hydroxy acid dehydrogenase / malonic semialdehyde reductase [EC:1.1.1.381 1.1.1.-]	188	26	11	13	6	0	4
K00133	Amino acid metabolism;00270 Cysteine and methionine metabolism [PATH:ko00270];asd; aspartate-semialdehyde dehydrogenase [EC:1.2.1.11]	228	24	16	19	4	79	4
K09758	Amino acid metabolism;00270 Cysteine and methionine metabolism [PATH:ko00270];asdA; aspartate 4-decarboxylase [EC:4.1.1.12]	0	1	0	0	0	22	0
K00812	Amino acid metabolism;00270 Cysteine and methionine metabolism [PATH:ko00270];aspB; aspartate aminotransferase [EC:2.6.1.1]	64	16	6	11	8	99	10
K00813	Amino acid metabolism;00270 Cysteine and methionine metabolism [PATH:ko00270];aspC; aspartate aminotransferase [EC:2.6.1.1]	236	0	16	20	5	0	5
K01697	Amino acid metabolism;00270 Cysteine and methionine metabolism [PATH:ko00270];CBS; cystathionine beta-synthase [EC:4.2.1.22]	0	0	17	0	0	21	22
K16844	Amino acid metabolism;00270 Cysteine and methionine metabolism [PATH:ko00270];comC; (2R)-3-sulfolactate dehydrogenase (NADP+) [EC:1.1.1.338]	0	1	0	1	0	3	0
K01758	Amino acid metabolism;00270 Cysteine and methionine metabolism [PATH:ko00270];CTH; cystathionine gamma-lyase [EC:4.4.1.1]	2	0	10	0	1	14	4
K17950	Amino acid metabolism;00270 Cysteine and methionine metabolism [PATH:ko00270];cuyA; L-cysteate sulfo-lyase [EC:4.4.1.25]	15	0	3	0	0	0	0
K00640	Amino acid metabolism;00270 Cysteine and methionine metabolism [PATH:ko00270];cysE; serine O-acetyltransferase [EC:2.3.1.30]	182	53	9	24	7	168	5
K01738	Amino acid metabolism;00270 Cysteine and methionine metabolism [PATH:ko00270];cysK; cysteine synthase A [EC:2.5.1.47]	478	63	28	16	5	114	12
K12339	Amino acid metabolism;00270 Cysteine and methionine metabolism [PATH:ko00270];cysM; cysteine synthase B [EC:2.5.1.47]	211	22	13	17	3	76	3
K05396	Amino acid metabolism;00270 Cysteine and methionine metabolism [PATH:ko00270];dcyD; D-cysteine desulfhydrase [EC:4.4.1.15]	219	6	16	10	0	62	5
K00558	Amino acid metabolism;00270 Cysteine and methionine metabolism [PATH:ko00270];DNMT1, dcm; DNA (cytosine-5)-methyltransferase 1 [EC:2.1.1.37]	417	12	31	15	26	61	10
K00003	Amino acid metabolism;00270 Cysteine and methionine metabolism [PATH:ko00270];E1.1.1.3; homoserine dehydrogenase [EC:1.1.1.3]	0	33	0	0	0	93	0
K00826	Amino acid metabolism;00270 Cysteine and methionine metabolism [PATH:ko00270];E2.6.1.42, ilvE; branched-chain amino acid aminotransferase [EC:2.6.1.42]	185	26	15	21	2	91	4
K01251	Amino acid metabolism;00270 Cysteine and methionine metabolism [PATH:ko00270];E3.3.1.1, ahcY; adenosylhomocysteinase [EC:3.3.1.1]	0	43	0	1	1	97	3
K01505	Amino acid metabolism;00270 Cysteine and methionine metabolism [PATH:ko00270];E3.5.99.7; 1-aminocyclopropane-1-carboxylate deaminase [EC:3.5.99.7]	2	23	0	0	0	104	0
K01752	Amino acid metabolism;00270 Cysteine and methionine metabolism [PATH:ko00270];E4.3.1.17, sdaA, sdaB, tdcG; L-serine dehydratase [EC:4.3.1.17]	299	36	38	8	1	132	16
K01761	Amino acid metabolism;00270 Cysteine and methionine metabolism [PATH:ko00270];E4.4.1.11; methionine-gamma-lyase [EC:4.4.1.11]	266	2	2	12	0	2	2
K01919	Amino acid metabolism;00270 Cysteine and methionine metabolism [PATH:ko00270];gshA; glutamate--cysteine ligase [EC:6.3.2.2]	286	51	17	19	2	116	4
K01920	Amino acid metabolism;00270 Cysteine and methionine metabolism [PATH:ko00270];gshB; glutathione synthase [EC:6.3.2.3]	207	23	17	6	2	78	4
K13060	Amino acid metabolism;00270 Cysteine and methionine metabolism [PATH:ko00270];lasI, luxI; acyl homoserine lactone synthase [EC:2.3.1.184]	53	2	6	11	0	0	4
K00016	Amino acid metabolism;00270 Cysteine and methionine metabolism [PATH:ko00270];LDH, ldh; L-lactate dehydrogenase [EC:1.1.1.27]	0	0	3	0	1	0	0
K07173	Amino acid metabolism;00270 Cysteine and methionine metabolism [PATH:ko00270];luxS; S-ribosylhomocysteine lyase [EC:4.4.1.21]	120	0	8	11	3	0	3
K00928	Amino acid metabolism;00270 Cysteine and methionine metabolism [PATH:ko00270];lysC; aspartate kinase [EC:2.7.2.4]	273	35	22	17	1	84	4
K00024	Amino acid metabolism;00270 Cysteine and methionine metabolism [PATH:ko00270];mdh; malate dehydrogenase [EC:1.1.1.37]	206	23	13	13	5	0	5
K00651	Amino acid metabolism;00270 Cysteine and methionine metabolism [PATH:ko00270];metA; homoserine O-succinyltransferase [EC:2.3.1.46]	170	0	16	16	5	0	3
K01739	Amino acid metabolism;00270 Cysteine and methionine metabolism [PATH:ko00270];metB; cystathionine gamma-synthase [EC:2.5.1.48]	222	3	18	16	1	0	4
K01760	Amino acid metabolism;00270 Cysteine and methionine metabolism [PATH:ko00270];metC; cystathionine beta-lyase [EC:4.4.1.8]	345	39	27	20	2	11	5
K00549	Amino acid metabolism;00270 Cysteine and methionine metabolism [PATH:ko00270];metE; 5-methyltetrahydropteroyltriglutamate--homocysteine methyltransferase [EC:2.1.1.14]	616	39	71	46	20	100	16
K00548	Amino acid metabolism;00270 Cysteine and methionine metabolism [PATH:ko00270];metH, MTR; 5-methyltetrahydrofolate--homocysteine methyltransferase [EC:2.1.1.13]	361	80	52	23	9	192	5
K00789	Amino acid metabolism;00270 Cysteine and methionine metabolism [PATH:ko00270];metK; S-adenosylmethionine synthetase [EC:2.5.1.6]	183	25	18	21	6	102	9
K12525	Amino acid metabolism;00270 Cysteine and methionine metabolism [PATH:ko00270];metL; bifunctional aspartokinase / homoserine dehydrogenase 2 [EC:2.7.2.4 1.1.1.3]	433	0	31	20	11	0	3
K00641	Amino acid metabolism;00270 Cysteine and methionine metabolism [PATH:ko00270];metX; homoserine O-acetyltransferase [EC:2.3.1.31]	10	48	0	0	0	107	0
K01740	Amino acid metabolism;00270 Cysteine and methionine metabolism [PATH:ko00270];metY; O-acetylhomoserine (thiol)-lyase [EC:2.5.1.49]	1	15	0	0	0	0	0
K10764	Amino acid metabolism;00270 Cysteine and methionine metabolism [PATH:ko00270];metZ; O-succinylhomoserine sulfhydrylase [EC:2.5.1.-]	0	22	0	0	0	74	0
K00547	Amino acid metabolism;00270 Cysteine and methionine metabolism [PATH:ko00270];mmuM, BHMT2; homocysteine S-methyltransferase [EC:2.1.1.10]	222	1	18	11	1	4	4
K12960	Amino acid metabolism;00270 Cysteine and methionine metabolism [PATH:ko00270];mtaD; 5-methylthioadenosine/S-adenosylhomocysteine deaminase [EC:3.5.4.31 3.5.4.28]	9	0	2	0	0	98	0
K19696	Amino acid metabolism;00270 Cysteine and methionine metabolism [PATH:ko00270];mtiP; 5'-methylthioinosine phosphorylase [EC:2.4.2.44]	0	0	0	0	0	64	0
K08963	Amino acid metabolism;00270 Cysteine and methionine metabolism [PATH:ko00270];mtnA; methylthioribose-1-phosphate isomerase [EC:5.3.1.23]	203	1	16	14	2	76	3
K08964	Amino acid metabolism;00270 Cysteine and methionine metabolism [PATH:ko00270];mtnB; methylthioribulose-1-phosphate dehydratase [EC:4.2.1.109]	141	0	9	11	5	48	4
K09880	Amino acid metabolism;00270 Cysteine and methionine metabolism [PATH:ko00270];mtnC, ENOPH1; enolase-phosphatase E1 [EC:3.1.3.77]	157	0	9	15	4	49	3
K08967	Amino acid metabolism;00270 Cysteine and methionine metabolism [PATH:ko00270];mtnD, mtnZ, ADI1; 1,2-dihydroxy-3-keto-5-methylthiopentene dioxygenase [EC:1.13.11.53 1.13.11.54]	132	0	11	9	4	51	3
K08969	Amino acid metabolism;00270 Cysteine and methionine metabolism [PATH:ko00270];mtnE, mtnV; aminotransferase [EC:2.6.1.-]	19	0	0	0	0	0	0
K00899	Amino acid metabolism;00270 Cysteine and methionine metabolism [PATH:ko00270];mtnK; 5-methylthioribose kinase [EC:2.7.1.100]	276	1	19	17	4	0	3
K01243	Amino acid metabolism;00270 Cysteine and methionine metabolism [PATH:ko00270];mtnN, mtn, pfs; adenosylhomocysteine nucleosidase [EC:3.2.2.9]	162	14	9	10	3	0	5
K14155	Amino acid metabolism;00270 Cysteine and methionine metabolism [PATH:ko00270];patB, malY; cystathione beta-lyase [EC:4.4.1.8]	287	0	22	14	2	20	14
K13061	Amino acid metabolism;00270 Cysteine and methionine metabolism [PATH:ko00270];rhlI, phzI, solI, cepI, tofI; acyl homoserine lactone synthase [EC:2.3.1.184]	106	14	0	10	0	1	0
K17989	Amino acid metabolism;00270 Cysteine and methionine metabolism [PATH:ko00270];SDS, SDH, CHA1; L-serine/L-threonine ammonia-lyase [EC:4.3.1.17 4.3.1.19]	85	18	5	14	3	2	7
K01611	Amino acid metabolism;00270 Cysteine and methionine metabolism [PATH:ko00270];speD, AMD1; S-adenosylmethionine decarboxylase [EC:4.1.1.50]	147	7	15	24	2	72	3
K00797	Amino acid metabolism;00270 Cysteine and methionine metabolism [PATH:ko00270];speE, SRM; spermidine synthase [EC:2.5.1.16]	150	50	11	12	4	40	3
K16846	Amino acid metabolism;00270 Cysteine and methionine metabolism [PATH:ko00270];suyB; (2R)-sulfolactate sulfo-lyase subunit beta [EC:4.4.1.24]	0	3	0	2	0	0	0
K12524	Amino acid metabolism;00270 Cysteine and methionine metabolism [PATH:ko00270];thrA; bifunctional aspartokinase / homoserine dehydrogenase 1 [EC:2.7.2.4 1.1.1.3]	442	0	25	18	10	0	5
K01011	Amino acid metabolism;00270 Cysteine and methionine metabolism [PATH:ko00270];TST, MPST, sseA; thiosulfate/3-mercaptopyruvate sulfurtransferase [EC:2.8.1.1 2.8.1.2]	177	25	27	19	1	147	5
K00832	Amino acid metabolism;00270 Cysteine and methionine metabolism [PATH:ko00270];tyrB; aromatic-amino-acid transaminase [EC:2.6.1.57]	271	54	18	26	5	107	9
K01907	Amino acid metabolism;00280 Valine, leucine and isoleucine degradation [PATH:ko00280];AACS, acsA; acetoacetyl-CoA synthetase [EC:6.2.1.16]	0	6	0	0	0	2	0
K00249	Amino acid metabolism;00280 Valine, leucine and isoleucine degradation [PATH:ko00280];ACADM, acd; acyl-CoA dehydrogenase [EC:1.3.8.7]	16	112	0	0	0	52	0
K00248	Amino acid metabolism;00280 Valine, leucine and isoleucine degradation [PATH:ko00280];ACADS, bcd; butyryl-CoA dehydrogenase [EC:1.3.8.1]	0	20	0	0	0	16	0
K00128	Amino acid metabolism;00280 Valine, leucine and isoleucine degradation [PATH:ko00280];ALDH; aldehyde dehydrogenase (NAD+) [EC:1.2.1.3]	493	198	17	30	3	457	2
K11263	Amino acid metabolism;00280 Valine, leucine and isoleucine degradation [PATH:ko00280];bccA; acetyl-CoA/propionyl-CoA carboxylase, biotin carboxylase, biotin carboxyl carrier protein [EC:6.4.1.2 6.4.1.3 6.3.4.14]	0	6	0	0	0	40	0
K00166	Amino acid metabolism;00280 Valine, leucine and isoleucine degradation [PATH:ko00280];BCKDHA, bkdA1; 2-oxoisovalerate dehydrogenase E1 component alpha subunit [EC:1.2.4.4]	0	16	0	0	0	58	0
K00167	Amino acid metabolism;00280 Valine, leucine and isoleucine degradation [PATH:ko00280];BCKDHB, bkdA2; 2-oxoisovalerate dehydrogenase E1 component beta subunit [EC:1.2.4.4]	0	18	0	0	0	62	0
K11381	Amino acid metabolism;00280 Valine, leucine and isoleucine degradation [PATH:ko00280];bkdA; 2-oxoisovalerate dehydrogenase E1 component [EC:1.2.4.4]	0	0	0	0	0	7	0
K09699	Amino acid metabolism;00280 Valine, leucine and isoleucine degradation [PATH:ko00280];DBT, bkdB; 2-oxoisovalerate dehydrogenase E2 component (dihydrolipoyl transacylase) [EC:2.3.1.168]	0	21	0	0	0	72	0
K00382	Amino acid metabolism;00280 Valine, leucine and isoleucine degradation [PATH:ko00280];DLD, lpd, pdhD; dihydrolipoamide dehydrogenase [EC:1.8.1.4]	228	108	22	11	10	316	12
K00263	Amino acid metabolism;00280 Valine, leucine and isoleucine degradation [PATH:ko00280];E1.4.1.9; leucine dehydrogenase [EC:1.4.1.9]	1	0	0	0	0	18	0
K00626	Amino acid metabolism;00280 Valine, leucine and isoleucine degradation [PATH:ko00280];E2.3.1.9, atoB; acetyl-CoA C-acetyltransferase [EC:2.3.1.9]	18	199	27	0	15	331	10
K00822	Amino acid metabolism;00280 Valine, leucine and isoleucine degradation [PATH:ko00280];E2.6.1.18; beta-alanine--pyruvate transaminase [EC:2.6.1.18]	73	28	0	3	0	95	3
K00826	Amino acid metabolism;00280 Valine, leucine and isoleucine degradation [PATH:ko00280];E2.6.1.42, ilvE; branched-chain amino acid aminotransferase [EC:2.6.1.42]	185	26	15	21	2	91	4
K01028	Amino acid metabolism;00280 Valine, leucine and isoleucine degradation [PATH:ko00280];E2.8.3.5A, scoA; 3-oxoacid CoA-transferase subunit A [EC:2.8.3.5]	3	17	6	0	0	50	3
K01029	Amino acid metabolism;00280 Valine, leucine and isoleucine degradation [PATH:ko00280];E2.8.3.5B, scoB; 3-oxoacid CoA-transferase subunit B [EC:2.8.3.5]	4	16	7	0	0	54	3
K01640	Amino acid metabolism;00280 Valine, leucine and isoleucine degradation [PATH:ko00280];E4.1.3.4, HMGCL, hmgL; hydroxymethylglutaryl-CoA lyase [EC:4.1.3.4]	0	50	3	0	2	167	0
K11942	Amino acid metabolism;00280 Valine, leucine and isoleucine degradation [PATH:ko00280];E5.4.99.2; methylmalonyl-CoA mutase [EC:5.4.99.2]	0	8	0	0	0	0	0
K01848	Amino acid metabolism;00280 Valine, leucine and isoleucine degradation [PATH:ko00280];E5.4.99.2A, mcmA1; methylmalonyl-CoA mutase, N-terminal domain [EC:5.4.99.2]	0	8	0	0	0	0	0
K01849	Amino acid metabolism;00280 Valine, leucine and isoleucine degradation [PATH:ko00280];E5.4.99.2B, mcmA2; methylmalonyl-CoA mutase, C-terminal domain [EC:5.4.99.2]	0	1	0	0	0	0	0
K01968	Amino acid metabolism;00280 Valine, leucine and isoleucine degradation [PATH:ko00280];E6.4.1.4A; 3-methylcrotonyl-CoA carboxylase alpha subunit [EC:6.4.1.4]	0	26	0	0	0	112	0
K01969	Amino acid metabolism;00280 Valine, leucine and isoleucine degradation [PATH:ko00280];E6.4.1.4B; 3-methylcrotonyl-CoA carboxylase beta subunit [EC:6.4.1.4]	0	25	0	0	0	94	0
K00632	Amino acid metabolism;00280 Valine, leucine and isoleucine degradation [PATH:ko00280];fadA, fadI; acetyl-CoA acyltransferase [EC:2.3.1.16]	497	22	30	24	11	69	9
K01825	Amino acid metabolism;00280 Valine, leucine and isoleucine degradation [PATH:ko00280];fadB; 3-hydroxyacyl-CoA dehydrogenase / enoyl-CoA hydratase / 3-hydroxybutyryl-CoA epimerase / enoyl-CoA isomerase [EC:1.1.1.35 4.2.1.17 5.1.2.3 5.3.3.8]	422	2	30	21	5	138	8
K01782	Amino acid metabolism;00280 Valine, leucine and isoleucine degradation [PATH:ko00280];fadJ; 3-hydroxyacyl-CoA dehydrogenase / enoyl-CoA hydratase / 3-hydroxybutyryl-CoA epimerase [EC:1.1.1.35 4.2.1.17 5.1.2.3]	417	0	24	16	5	35	8
K07250	Amino acid metabolism;00280 Valine, leucine and isoleucine degradation [PATH:ko00280];gabT; 4-aminobutyrate aminotransferase / (S)-3-amino-2-methylpropionate transaminase [EC:2.6.1.19 2.6.1.22]	282	1	3	16	0	41	1
K00253	Amino acid metabolism;00280 Valine, leucine and isoleucine degradation [PATH:ko00280];IVD, ivd; isovaleryl-CoA dehydrogenase [EC:1.3.8.4]	0	11	0	0	0	76	0
K13766	Amino acid metabolism;00280 Valine, leucine and isoleucine degradation [PATH:ko00280];liuC; methylglutaconyl-CoA hydratase [EC:4.2.1.18]	1	27	0	0	0	62	0
K05606	Amino acid metabolism;00280 Valine, leucine and isoleucine degradation [PATH:ko00280];MCEE, epi; methylmalonyl-CoA/ethylmalonyl-CoA epimerase [EC:5.1.99.1]	38	0	0	0	0	0	0
K00140	Amino acid metabolism;00280 Valine, leucine and isoleucine degradation [PATH:ko00280];mmsA, iolA, ALDH6A1; malonate-semialdehyde dehydrogenase (acetylating) / methylmalonate-semialdehyde dehydrogenase [EC:1.2.1.18 1.2.1.27]	324	102	14	31	1	318	19
K00020	Amino acid metabolism;00280 Valine, leucine and isoleucine degradation [PATH:ko00280];mmsB, HIBADH; 3-hydroxyisobutyrate dehydrogenase [EC:1.1.1.31]	197	85	2	17	0	232	0
K01847	Amino acid metabolism;00280 Valine, leucine and isoleucine degradation [PATH:ko00280];MUT; methylmalonyl-CoA mutase [EC:5.4.99.2]	0	7	1	0	0	0	0
K01692	Amino acid metabolism;00280 Valine, leucine and isoleucine degradation [PATH:ko00280];paaF, echA; enoyl-CoA hydratase [EC:4.2.1.17]	4	60	11	0	0	83	6
K01966	Amino acid metabolism;00280 Valine, leucine and isoleucine degradation [PATH:ko00280];PCCB, pccB; propionyl-CoA carboxylase beta chain [EC:6.4.1.3]	0	1	0	0	0	0	0
K14260	Amino acid metabolism;00290 Valine, leucine and isoleucine biosynthesis [PATH:ko00290];alaA; alanine-synthesizing transaminase [EC:2.6.1.66 2.6.1.2]	197	21	21	21	1	66	3
K00835	Amino acid metabolism;00290 Valine, leucine and isoleucine biosynthesis [PATH:ko00290];avtA; valine--pyruvate aminotransferase [EC:2.6.1.66]	276	0	22	25	5	0	6
K00263	Amino acid metabolism;00290 Valine, leucine and isoleucine biosynthesis [PATH:ko00290];E1.4.1.9; leucine dehydrogenase [EC:1.4.1.9]	1	0	0	0	0	18	0
K01652	Amino acid metabolism;00290 Valine, leucine and isoleucine biosynthesis [PATH:ko00290];E2.2.1.6L, ilvB, ilvG, ilvI; acetolactate synthase I/II/III large subunit [EC:2.2.1.6]	938	152	87	51	21	438	24
K01653	Amino acid metabolism;00290 Valine, leucine and isoleucine biosynthesis [PATH:ko00290];E2.2.1.6S, ilvH, ilvN; acetolactate synthase I/III small subunit [EC:2.2.1.6]	125	15	23	9	5	46	6
K00826	Amino acid metabolism;00290 Valine, leucine and isoleucine biosynthesis [PATH:ko00290];E2.6.1.42, ilvE; branched-chain amino acid aminotransferase [EC:2.6.1.42]	185	26	15	21	2	91	4
K01754	Amino acid metabolism;00290 Valine, leucine and isoleucine biosynthesis [PATH:ko00290];E4.3.1.19, ilvA, tdcB; threonine dehydratase [EC:4.3.1.19]	463	81	30	17	6	305	9
K00053	Amino acid metabolism;00290 Valine, leucine and isoleucine biosynthesis [PATH:ko00290];ilvC; ketol-acid reductoisomerase [EC:1.1.1.86]	295	22	14	25	13	69	4
K01687	Amino acid metabolism;00290 Valine, leucine and isoleucine biosynthesis [PATH:ko00290];ilvD; dihydroxy-acid dehydratase [EC:4.2.1.9]	326	89	27	12	6	309	4
K11258	Amino acid metabolism;00290 Valine, leucine and isoleucine biosynthesis [PATH:ko00290];ilvM; acetolactate synthase II small subunit [EC:2.2.1.6]	84	0	12	14	0	0	5
K01649	Amino acid metabolism;00290 Valine, leucine and isoleucine biosynthesis [PATH:ko00290];leuA, IMS; 2-isopropylmalate synthase [EC:2.3.3.13]	587	75	46	21	6	145	23
K00052	Amino acid metabolism;00290 Valine, leucine and isoleucine biosynthesis [PATH:ko00290];leuB, IMDH; 3-isopropylmalate dehydrogenase [EC:1.1.1.85]	232	32	27	16	8	76	5
K01703	Amino acid metabolism;00290 Valine, leucine and isoleucine biosynthesis [PATH:ko00290];leuC, IPMI-L; 3-isopropylmalate/(R)-2-methylmalate dehydratase large subunit [EC:4.2.1.33 4.2.1.35]	304	37	17	22	5	114	4
K01704	Amino acid metabolism;00290 Valine, leucine and isoleucine biosynthesis [PATH:ko00290];leuD, IPMI-S; 3-isopropylmalate/(R)-2-methylmalate dehydratase small subunit [EC:4.2.1.33 4.2.1.35]	186	26	14	21	3	61	3
K17989	Amino acid metabolism;00290 Valine, leucine and isoleucine biosynthesis [PATH:ko00290];SDS, SDH, CHA1; L-serine/L-threonine ammonia-lyase [EC:4.3.1.17 4.3.1.19]	85	18	5	14	3	2	7
K00821	Amino acid metabolism;00300 Lysine biosynthesis [PATH:ko00300];argD; acetylornithine/N-succinyldiaminopimelate aminotransferase [EC:2.6.1.11 2.6.1.17]	290	41	19	16	2	98	3
K00133	Amino acid metabolism;00300 Lysine biosynthesis [PATH:ko00300];asd; aspartate-semialdehyde dehydrogenase [EC:1.2.1.11]	228	24	16	19	4	79	4
K01714	Amino acid metabolism;00300 Lysine biosynthesis [PATH:ko00300];dapA; 4-hydroxy-tetrahydrodipicolinate synthase [EC:4.3.3.7]	697	136	63	38	42	267	18
K00215	Amino acid metabolism;00300 Lysine biosynthesis [PATH:ko00300];dapB; 4-hydroxy-tetrahydrodipicolinate reductase [EC:1.17.1.8]	202	11	18	15	2	78	4
K14267	Amino acid metabolism;00300 Lysine biosynthesis [PATH:ko00300];dapC; N-succinyldiaminopimelate aminotransferase [EC:2.6.1.17]	1	17	0	0	0	92	0
K00674	Amino acid metabolism;00300 Lysine biosynthesis [PATH:ko00300];dapD; 2,3,4,5-tetrahydropyridine-2-carboxylate N-succinyltransferase [EC:2.3.1.117]	157	14	11	26	1	72	6
K01439	Amino acid metabolism;00300 Lysine biosynthesis [PATH:ko00300];dapE; succinyl-diaminopimelate desuccinylase [EC:3.5.1.18]	514	21	22	14	2	105	5
K01778	Amino acid metabolism;00300 Lysine biosynthesis [PATH:ko00300];dapF; diaminopimelate epimerase [EC:5.1.1.7]	194	21	13	14	9	70	6
K00003	Amino acid metabolism;00300 Lysine biosynthesis [PATH:ko00300];E1.1.1.3; homoserine dehydrogenase [EC:1.1.1.3]	0	33	0	0	0	93	0
K10206	Amino acid metabolism;00300 Lysine biosynthesis [PATH:ko00300];E2.6.1.83; LL-diaminopimelate aminotransferase [EC:2.6.1.83]	1	0	0	0	0	0	0
K00290	Amino acid metabolism;00300 Lysine biosynthesis [PATH:ko00300];LYS1; saccharopine dehydrogenase (NAD+, L-lysine forming) [EC:1.5.1.7]	0	22	0	0	0	11	0
K01586	Amino acid metabolism;00300 Lysine biosynthesis [PATH:ko00300];lysA; diaminopimelate decarboxylase [EC:4.1.1.20]	321	19	23	15	2	118	40
K00928	Amino acid metabolism;00300 Lysine biosynthesis [PATH:ko00300];lysC; aspartate kinase [EC:2.7.2.4]	273	35	22	17	1	84	4
K05825	Amino acid metabolism;00300 Lysine biosynthesis [PATH:ko00300];LYSN; 2-aminoadipate transaminase [EC:2.6.1.-]	0	10	0	0	0	0	0
K12525	Amino acid metabolism;00300 Lysine biosynthesis [PATH:ko00300];metL; bifunctional aspartokinase / homoserine dehydrogenase 2 [EC:2.7.2.4 1.1.1.3]	433	0	31	20	11	0	3
K01928	Amino acid metabolism;00300 Lysine biosynthesis [PATH:ko00300];murE; UDP-N-acetylmuramoyl-L-alanyl-D-glutamate--2,6-diaminopimelate ligase [EC:6.3.2.13]	289	36	26	13	3	130	7
K01929	Amino acid metabolism;00300 Lysine biosynthesis [PATH:ko00300];murF; UDP-N-acetylmuramoyl-tripeptide--D-alanyl-D-alanine ligase [EC:6.3.2.10]	282	33	19	20	4	89	8
K00841	Amino acid metabolism;00300 Lysine biosynthesis [PATH:ko00300];patA; aminotransferase [EC:2.6.1.-]	0	0	0	0	0	0	1
K12524	Amino acid metabolism;00300 Lysine biosynthesis [PATH:ko00300];thrA; bifunctional aspartokinase / homoserine dehydrogenase 1 [EC:2.7.2.4 1.1.1.3]	442	0	25	18	10	0	5
K00128	Amino acid metabolism;00310 Lysine degradation [PATH:ko00310];ALDH; aldehyde dehydrogenase (NAD+) [EC:1.2.1.3]	493	198	17	30	3	457	2
K01035	Amino acid metabolism;00310 Lysine degradation [PATH:ko00310];atoA; acetate CoA/acetoacetate CoA-transferase beta subunit [EC:2.8.3.8 2.8.3.9]	1	0	0	0	0	0	0
K01034	Amino acid metabolism;00310 Lysine degradation [PATH:ko00310];atoD; acetate CoA/acetoacetate CoA-transferase alpha subunit [EC:2.8.3.8 2.8.3.9]	1	2	0	0	0	0	0
K00824	Amino acid metabolism;00310 Lysine degradation [PATH:ko00310];dat; D-alanine transaminase [EC:2.6.1.21]	0	12	0	4	0	0	0
K14268	Amino acid metabolism;00310 Lysine degradation [PATH:ko00310];davT, gabT; 5-aminovalerate/4-aminobutyrate aminotransferase [EC:2.6.1.48 2.6.1.19]	0	0	0	0	0	105	0
K00658	Amino acid metabolism;00310 Lysine degradation [PATH:ko00310];DLST, sucB; 2-oxoglutarate dehydrogenase E2 component (dihydrolipoamide succinyltransferase) [EC:2.3.1.61]	187	21	9	26	4	82	4
K13609	Amino acid metabolism;00310 Lysine degradation [PATH:ko00310];dpkA, lhpD; delta1-piperideine-2-carboxylate reductase [EC:1.5.1.21]	0	0	0	0	0	17	0
K00471	Amino acid metabolism;00310 Lysine degradation [PATH:ko00310];E1.14.11.1; gamma-butyrobetaine dioxygenase [EC:1.14.11.1]	0	14	0	0	0	59	0
K00626	Amino acid metabolism;00310 Lysine degradation [PATH:ko00310];E2.3.1.9, atoB; acetyl-CoA C-acetyltransferase [EC:2.3.1.9]	18	199	27	0	15	331	10
K01582	Amino acid metabolism;00310 Lysine degradation [PATH:ko00310];E4.1.1.18, ldcC, cadA; lysine decarboxylase [EC:4.1.1.18]	384	19	32	20	3	34	12
K01825	Amino acid metabolism;00310 Lysine degradation [PATH:ko00310];fadB; 3-hydroxyacyl-CoA dehydrogenase / enoyl-CoA hydratase / 3-hydroxybutyryl-CoA epimerase / enoyl-CoA isomerase [EC:1.1.1.35 4.2.1.17 5.1.2.3 5.3.3.8]	422	2	30	21	5	138	8
K01782	Amino acid metabolism;00310 Lysine degradation [PATH:ko00310];fadJ; 3-hydroxyacyl-CoA dehydrogenase / enoyl-CoA hydratase / 3-hydroxybutyryl-CoA epimerase [EC:1.1.1.35 4.2.1.17 5.1.2.3]	417	0	24	16	5	35	8
K00135	Amino acid metabolism;00310 Lysine degradation [PATH:ko00310];gabD; succinate-semialdehyde dehydrogenase / glutarate-semialdehyde dehydrogenase [EC:1.2.1.16 1.2.1.79 1.2.1.20]	926	143	64	40	0	248	24
K00252	Amino acid metabolism;00310 Lysine degradation [PATH:ko00310];GCDH, gcdH; glutaryl-CoA dehydrogenase [EC:1.3.8.6]	0	23	0	0	0	13	0
K03894	Amino acid metabolism;00310 Lysine degradation [PATH:ko00310];iucA; N2-citryl-N6-acetyl-N6-hydroxylysine synthase [EC:6.3.2.38]	190	0	15	1	0	0	0
K03896	Amino acid metabolism;00310 Lysine degradation [PATH:ko00310];iucB; acetyl CoA:N6-hydroxylysine acetyl transferase [EC:2.3.1.102]	109	0	8	0	0	3	0
K03895	Amino acid metabolism;00310 Lysine degradation [PATH:ko00310];iucC; aerobactin synthase [EC:6.3.2.39]	170	0	15	1	0	0	0
K03897	Amino acid metabolism;00310 Lysine degradation [PATH:ko00310];iucD; lysine N6-hydroxylase [EC:1.14.13.59]	362	4	11	3	0	0	7
K19743	Amino acid metabolism;00310 Lysine degradation [PATH:ko00310];lhpI; 1-piperideine-2-carboxylate/1-pyrroline-2-carboxylate reductase [NAD(P)H] [EC:1.5.1.1]	0	14	0	0	0	0	0
K00290	Amino acid metabolism;00310 Lysine degradation [PATH:ko00310];LYS1; saccharopine dehydrogenase (NAD+, L-lysine forming) [EC:1.5.1.7]	0	22	0	0	0	11	0
K00164	Amino acid metabolism;00310 Lysine degradation [PATH:ko00310];OGDH, sucA; 2-oxoglutarate dehydrogenase E1 component [EC:1.2.4.2]	391	50	38	28	3	153	8
K01692	Amino acid metabolism;00310 Lysine degradation [PATH:ko00310];paaF, echA; enoyl-CoA hydratase [EC:4.2.1.17]	4	60	11	0	0	83	6
K11433	Amino acid metabolism;00310 Lysine degradation [PATH:ko00310];SETMAR; histone-lysine N-methyltransferase SETMAR [EC:2.1.1.43]	0	0	0	0	0	813	0
K01584	Amino acid metabolism;00330 Arginine and proline metabolism [PATH:ko00330];adiA; arginine decarboxylase [EC:4.1.1.19]	0	47	0	0	0	4	3
K10536	Amino acid metabolism;00330 Arginine and proline metabolism [PATH:ko00330];aguA; agmatine deiminase [EC:3.5.3.12]	0	4	7	0	5	98	2
K12251	Amino acid metabolism;00330 Arginine and proline metabolism [PATH:ko00330];aguB; N-carbamoylputrescine amidase [EC:3.5.1.53]	0	4	12	0	0	0	0
K00128	Amino acid metabolism;00330 Arginine and proline metabolism [PATH:ko00330];ALDH; aldehyde dehydrogenase (NAD+) [EC:1.2.1.3]	493	198	17	30	3	457	2
K12252	Amino acid metabolism;00330 Arginine and proline metabolism [PATH:ko00330];aruH; arginine:pyruvate transaminase [EC:2.6.1.84]	0	5	0	0	0	0	0
K00812	Amino acid metabolism;00330 Arginine and proline metabolism [PATH:ko00330];aspB; aspartate aminotransferase [EC:2.6.1.1]	64	16	6	11	8	99	10
K00813	Amino acid metabolism;00330 Arginine and proline metabolism [PATH:ko00330];aspC; aspartate aminotransferase [EC:2.6.1.1]	236	0	16	20	5	0	5
K00673	Amino acid metabolism;00330 Arginine and proline metabolism [PATH:ko00330];astA; arginine N-succinyltransferase [EC:2.3.1.109]	215	21	12	15	17	154	6
K01484	Amino acid metabolism;00330 Arginine and proline metabolism [PATH:ko00330];astB; succinylarginine dihydrolase [EC:3.5.3.23]	304	19	17	13	19	90	5
K00840	Amino acid metabolism;00330 Arginine and proline metabolism [PATH:ko00330];astC; succinylornithine aminotransferase [EC:2.6.1.81]	233	0	32	4	21	0	3
K06447	Amino acid metabolism;00330 Arginine and proline metabolism [PATH:ko00330];astD; succinylglutamic semialdehyde dehydrogenase [EC:1.2.1.71]	318	11	16	13	12	90	8
K05526	Amino acid metabolism;00330 Arginine and proline metabolism [PATH:ko00330];astE; succinylglutamate desuccinylase [EC:3.5.1.96]	247	27	19	18	7	79	7
K01485	Amino acid metabolism;00330 Arginine and proline metabolism [PATH:ko00330];codA; cytosine deaminase [EC:3.5.4.1]	243	57	23	15	2	84	5
K00824	Amino acid metabolism;00330 Arginine and proline metabolism [PATH:ko00330];dat; D-alanine transaminase [EC:2.6.1.21]	0	12	0	4	0	0	0
K00294	Amino acid metabolism;00330 Arginine and proline metabolism [PATH:ko00330];E1.2.1.88; 1-pyrroline-5-carboxylate dehydrogenase [EC:1.2.1.88]	0	1	0	0	0	0	0
K01426	Amino acid metabolism;00330 Arginine and proline metabolism [PATH:ko00330];E3.5.1.4, amiE; amidase [EC:3.5.1.4]	79	158	13	0	7	260	2
K01470	Amino acid metabolism;00330 Arginine and proline metabolism [PATH:ko00330];E3.5.2.10; creatinine amidohydrolase [EC:3.5.2.10]	9	3	5	0	1	2	0
K01476	Amino acid metabolism;00330 Arginine and proline metabolism [PATH:ko00330];E3.5.3.1, rocF, arg; arginase [EC:3.5.3.1]	7	14	11	1	2	8	5
K08688	Amino acid metabolism;00330 Arginine and proline metabolism [PATH:ko00330];E3.5.3.3; creatinase [EC:3.5.3.3]	0	2	0	0	0	0	0
K01581	Amino acid metabolism;00330 Arginine and proline metabolism [PATH:ko00330];E4.1.1.17, ODC1, speC, speF; ornithine decarboxylase [EC:4.1.1.17]	457	9	50	21	5	54	8
K01750	Amino acid metabolism;00330 Arginine and proline metabolism [PATH:ko00330];E4.3.1.12, ocd; ornithine cyclodeaminase [EC:4.3.1.12]	150	45	0	9	0	22	4
K00613	Amino acid metabolism;00330 Arginine and proline metabolism [PATH:ko00330];GATM; glycine amidinotransferase [EC:2.1.4.1]	13	0	0	0	0	14	0
K12255	Amino acid metabolism;00330 Arginine and proline metabolism [PATH:ko00330];gbuA; guanidinobutyrase [EC:3.5.3.7]	7	23	2	0	24	83	3
K01473	Amino acid metabolism;00330 Arginine and proline metabolism [PATH:ko00330];hyuA; N-methylhydantoinase A [EC:3.5.2.14]	267	22	9	2	0	0	1
K01474	Amino acid metabolism;00330 Arginine and proline metabolism [PATH:ko00330];hyuB; N-methylhydantoinase B [EC:3.5.2.14]	241	16	4	1	0	0	2
K12254	Amino acid metabolism;00330 Arginine and proline metabolism [PATH:ko00330];kauB; 4-guanidinobutyraldehyde dehydrogenase / NAD-dependent aldehyde dehydrogenase [EC:1.2.1.54 1.2.1.-]	0	0	0	0	0	171	0
K18384	Amino acid metabolism;00330 Arginine and proline metabolism [PATH:ko00330];L3HYPDH; trans-L-3-hydroxyproline dehydratase [EC:4.2.1.77]	0	16	0	0	0	2	0
K12658	Amino acid metabolism;00330 Arginine and proline metabolism [PATH:ko00330];lhpA; 4-hydroxyproline epimerase [EC:5.1.1.8]	0	22	1	2	2	91	4
K19743	Amino acid metabolism;00330 Arginine and proline metabolism [PATH:ko00330];lhpI; 1-piperideine-2-carboxylate/1-pyrroline-2-carboxylate reductase [NAD(P)H] [EC:1.5.1.1]	0	14	0	0	0	0	0
K00274	Amino acid metabolism;00330 Arginine and proline metabolism [PATH:ko00330];MAO, aofH; monoamine oxidase [EC:1.4.3.4]	0	10	0	0	0	145	0
K13747	Amino acid metabolism;00330 Arginine and proline metabolism [PATH:ko00330];nspC; carboxynorspermidine decarboxylase [EC:4.1.1.96]	0	0	0	0	0	9	0
K00472	Amino acid metabolism;00330 Arginine and proline metabolism [PATH:ko00330];P4HA; prolyl 4-hydroxylase [EC:1.14.11.2]	0	1	0	0	0	0	0
K09251	Amino acid metabolism;00330 Arginine and proline metabolism [PATH:ko00330];patA; putrescine aminotransferase [EC:2.6.1.82]	0	0	17	0	3	2	0
K01259	Amino acid metabolism;00330 Arginine and proline metabolism [PATH:ko00330];pip; proline iminopeptidase [EC:3.4.11.5]	0	37	0	1	0	80	4
K01777	Amino acid metabolism;00330 Arginine and proline metabolism [PATH:ko00330];prdF; proline racemase [EC:5.1.1.4]	0	2	0	0	0	0	0
K00147	Amino acid metabolism;00330 Arginine and proline metabolism [PATH:ko00330];proA; glutamate-5-semialdehyde dehydrogenase [EC:1.2.1.41]	263	24	16	11	4	82	4
K00931	Amino acid metabolism;00330 Arginine and proline metabolism [PATH:ko00330];proB; glutamate 5-kinase [EC:2.7.2.11]	201	29	15	15	3	83	6
K00286	Amino acid metabolism;00330 Arginine and proline metabolism [PATH:ko00330];proC; pyrroline-5-carboxylate reductase [EC:1.5.1.2]	217	20	9	13	6	73	6
K00318	Amino acid metabolism;00330 Arginine and proline metabolism [PATH:ko00330];PRODH; proline dehydrogenase [EC:1.5.-.-]	0	1	0	0	0	0	0
K00137	Amino acid metabolism;00330 Arginine and proline metabolism [PATH:ko00330];prr; aminobutyraldehyde dehydrogenase [EC:1.2.1.19]	0	0	14	0	3	56	9
K13821	Amino acid metabolism;00330 Arginine and proline metabolism [PATH:ko00330];putA; RHH-type transcriptional regulator, proline utilization regulon repressor / proline dehydrogenase / delta 1-pyrroline-5-carboxylate dehydrogenase [EC:1.5.5.2 1.2.1.88]	592	70	59	26	3	244	8
K09470	Amino acid metabolism;00330 Arginine and proline metabolism [PATH:ko00330];puuA; gamma-glutamylputrescine synthase [EC:6.3.1.11]	262	0	25	13	2	0	13
K09471	Amino acid metabolism;00330 Arginine and proline metabolism [PATH:ko00330];puuB, ordL; gamma-glutamylputrescine oxidase [EC:1.4.3.-]	255	53	8	15	10	108	11
K09472	Amino acid metabolism;00330 Arginine and proline metabolism [PATH:ko00330];puuC, aldH; gamma-glutamyl-gamma-aminobutyraldehyde dehydrogenase [EC:1.2.1.-]	12	50	36	0	4	92	3
K09473	Amino acid metabolism;00330 Arginine and proline metabolism [PATH:ko00330];puuD; gamma-glutamyl-gamma-aminobutyrate hydrolase [EC:3.5.1.94]	174	0	9	1	1	0	5
K00819	Amino acid metabolism;00330 Arginine and proline metabolism [PATH:ko00330];rocD, OAT; ornithine--oxo-acid transaminase [EC:2.6.1.13]	0	6	0	0	0	0	0
K00316	Amino acid metabolism;00330 Arginine and proline metabolism [PATH:ko00330];spdH; spermidine dehydrogenase [EC:1.5.99.6]	0	0	0	0	1	0	6
K01585	Amino acid metabolism;00330 Arginine and proline metabolism [PATH:ko00330];speA; arginine decarboxylase [EC:4.1.1.19]	366	0	17	28	7	156	8
K01480	Amino acid metabolism;00330 Arginine and proline metabolism [PATH:ko00330];speB; agmatinase [EC:3.5.3.11]	242	15	12	9	1	3	3
K01611	Amino acid metabolism;00330 Arginine and proline metabolism [PATH:ko00330];speD, AMD1; S-adenosylmethionine decarboxylase [EC:4.1.1.50]	147	7	15	24	2	72	3
K00797	Amino acid metabolism;00330 Arginine and proline metabolism [PATH:ko00330];speE, SRM; spermidine synthase [EC:2.5.1.16]	150	50	11	12	4	40	3
K00657	Amino acid metabolism;00330 Arginine and proline metabolism [PATH:ko00330];speG, SAT; diamine N-acetyltransferase [EC:2.3.1.57]	151	22	7	2	4	0	4
K12256	Amino acid metabolism;00330 Arginine and proline metabolism [PATH:ko00330];spuC; putrescine aminotransferase [EC:2.6.1.-]	0	33	0	0	0	97	0
K00128	Amino acid metabolism;00340 Histidine metabolism [PATH:ko00340];ALDH; aldehyde dehydrogenase (NAD+) [EC:1.2.1.3]	493	198	17	30	3	457	2
K01593	Amino acid metabolism;00340 Histidine metabolism [PATH:ko00340];DDC; aromatic-L-amino-acid decarboxylase [EC:4.1.1.28]	0	18	0	0	0	0	0
K00129	Amino acid metabolism;00340 Histidine metabolism [PATH:ko00340];E1.2.1.5; aldehyde dehydrogenase (NAD(P)+) [EC:1.2.1.5]	0	0	0	0	1	0	0
K04486	Amino acid metabolism;00340 Histidine metabolism [PATH:ko00340];E3.1.3.15B; histidinol-phosphatase (PHP family) [EC:3.1.3.15]	0	0	0	0	0	1	0
K07008	Amino acid metabolism;00340 Histidine metabolism [PATH:ko00340];egtC; gamma-glutamyl hercynylcysteine S-oxide hydrolase [EC:3.5.1.118]	252	42	10	14	4	64	5
K18911	Amino acid metabolism;00340 Histidine metabolism [PATH:ko00340];egtD; L-histidine Nalpha-methyltransferase [EC:2.1.1.44]	0	0	0	0	0	1	0
K01590	Amino acid metabolism;00340 Histidine metabolism [PATH:ko00340];hdc, HDC; histidine decarboxylase [EC:4.1.1.22]	0	0	15	0	8	0	2
K01814	Amino acid metabolism;00340 Histidine metabolism [PATH:ko00340];hisA; phosphoribosylformimino-5-aminoimidazole carboxamide ribotide isomerase [EC:5.3.1.16]	172	17	13	11	2	86	3
K01693	Amino acid metabolism;00340 Histidine metabolism [PATH:ko00340];hisB; imidazoleglycerol-phosphate dehydratase [EC:4.2.1.19]	0	11	0	0	0	63	0
K01089	Amino acid metabolism;00340 Histidine metabolism [PATH:ko00340];hisB; imidazoleglycerol-phosphate dehydratase / histidinol-phosphatase [EC:4.2.1.19 3.1.3.15]	190	0	14	12	0	0	6
K00817	Amino acid metabolism;00340 Histidine metabolism [PATH:ko00340];hisC; histidinol-phosphate aminotransferase [EC:2.6.1.9]	212	39	14	18	3	172	5
K00013	Amino acid metabolism;00340 Histidine metabolism [PATH:ko00340];hisD; histidinol dehydrogenase [EC:1.1.1.23]	296	31	22	22	3	73	4
K01523	Amino acid metabolism;00340 Histidine metabolism [PATH:ko00340];hisE; phosphoribosyl-ATP pyrophosphohydrolase [EC:3.6.1.31]	0	10	0	0	0	34	0
K02500	Amino acid metabolism;00340 Histidine metabolism [PATH:ko00340];hisF; cyclase [EC:4.1.3.-]	171	14	12	15	2	84	4
K00765	Amino acid metabolism;00340 Histidine metabolism [PATH:ko00340];hisG; ATP phosphoribosyltransferase [EC:2.4.2.17]	180	15	16	14	2	49	4
K02501	Amino acid metabolism;00340 Histidine metabolism [PATH:ko00340];hisH; glutamine amidotransferase [EC:2.4.2.-]	118	14	9	10	4	75	4
K01496	Amino acid metabolism;00340 Histidine metabolism [PATH:ko00340];hisI; phosphoribosyl-AMP cyclohydrolase [EC:3.5.4.19]	0	5	0	0	3	39	0
K11755	Amino acid metabolism;00340 Histidine metabolism [PATH:ko00340];hisIE; phosphoribosyl-ATP pyrophosphohydrolase / phosphoribosyl-AMP cyclohydrolase [EC:3.6.1.31 3.5.4.19]	164	0	15	11	1	0	6
K02502	Amino acid metabolism;00340 Histidine metabolism [PATH:ko00340];hisZ; ATP phosphoribosyltransferase regulatory subunit	0	21	0	0	0	62	0
K05603	Amino acid metabolism;00340 Histidine metabolism [PATH:ko00340];hutF; formimidoylglutamate deiminase [EC:3.5.3.13]	303	26	2	4	1	43	4
K01479	Amino acid metabolism;00340 Histidine metabolism [PATH:ko00340];hutG; formiminoglutamase [EC:3.5.3.8]	225	0	19	3	3	91	5
K01458	Amino acid metabolism;00340 Histidine metabolism [PATH:ko00340];hutG; N-formylglutamate deformylase [EC:3.5.1.68]	0	22	0	0	0	0	0
K01745	Amino acid metabolism;00340 Histidine metabolism [PATH:ko00340];hutH, HAL; histidine ammonia-lyase [EC:4.3.1.3]	435	54	30	8	7	191	5
K01468	Amino acid metabolism;00340 Histidine metabolism [PATH:ko00340];hutI, AMDHD1; imidazolonepropionase [EC:3.5.2.7]	241	19	20	2	4	93	6
K01712	Amino acid metabolism;00340 Histidine metabolism [PATH:ko00340];hutU, UROC1; urocanate hydratase [EC:4.2.1.49]	359	21	17	5	5	111	8
K00274	Amino acid metabolism;00340 Histidine metabolism [PATH:ko00340];MAO, aofH; monoamine oxidase [EC:1.4.3.4]	0	10	0	0	0	145	0
K04072	Amino acid metabolism;00350 Tyrosine metabolism [PATH:ko00350];adhE; acetaldehyde dehydrogenase / alcohol dehydrogenase [EC:1.2.1.10 1.1.1.1]	398	0	26	8	4	0	8
K13953	Amino acid metabolism;00350 Tyrosine metabolism [PATH:ko00350];adhP; alcohol dehydrogenase, propanol-preferring [EC:1.1.1.1]	100	22	21	15	8	76	7
K00276	Amino acid metabolism;00350 Tyrosine metabolism [PATH:ko00350];AOC3, AOC2, tynA; primary-amine oxidase [EC:1.4.3.21]	2	0	11	0	1	17	0
K00812	Amino acid metabolism;00350 Tyrosine metabolism [PATH:ko00350];aspB; aspartate aminotransferase [EC:2.6.1.1]	64	16	6	11	8	99	10
K00813	Amino acid metabolism;00350 Tyrosine metabolism [PATH:ko00350];aspC; aspartate aminotransferase [EC:2.6.1.1]	236	0	16	20	5	0	5
K01593	Amino acid metabolism;00350 Tyrosine metabolism [PATH:ko00350];DDC; aromatic-L-amino-acid decarboxylase [EC:4.1.1.28]	0	18	0	0	0	0	0
K00001	Amino acid metabolism;00350 Tyrosine metabolism [PATH:ko00350];E1.1.1.1, adh; alcohol dehydrogenase [EC:1.1.1.1]	134	42	11	1	7	144	0
K00055	Amino acid metabolism;00350 Tyrosine metabolism [PATH:ko00350];E1.1.1.90; aryl-alcohol dehydrogenase [EC:1.1.1.90]	0	8	2	0	1	0	2
K00450	Amino acid metabolism;00350 Tyrosine metabolism [PATH:ko00350];E1.13.11.4; gentisate 1,2-dioxygenase [EC:1.13.11.4]	1	9	1	0	0	0	0
K00129	Amino acid metabolism;00350 Tyrosine metabolism [PATH:ko00350];E1.2.1.5; aldehyde dehydrogenase (NAD(P)+) [EC:1.2.1.5]	0	0	0	0	1	0	0
K01668	Amino acid metabolism;00350 Tyrosine metabolism [PATH:ko00350];E4.1.99.2; tyrosine phenol-lyase [EC:4.1.99.2]	2	0	0	0	0	0	0
K16171	Amino acid metabolism;00350 Tyrosine metabolism [PATH:ko00350];faaH; fumarylacetoacetate (FAA) hydrolase [EC:3.7.1.2]	0	26	0	0	0	3	0
K01555	Amino acid metabolism;00350 Tyrosine metabolism [PATH:ko00350];FAH, fahA; fumarylacetoacetase [EC:3.7.1.2]	0	38	0	0	0	56	0
K00121	Amino acid metabolism;00350 Tyrosine metabolism [PATH:ko00350];frmA, ADH5, adhC; S-(hydroxymethyl)glutathione dehydrogenase / alcohol dehydrogenase [EC:1.1.1.284 1.1.1.1]	200	29	14	12	2	79	5
K00135	Amino acid metabolism;00350 Tyrosine metabolism [PATH:ko00350];gabD; succinate-semialdehyde dehydrogenase / glutarate-semialdehyde dehydrogenase [EC:1.2.1.16 1.2.1.79 1.2.1.20]	926	143	64	40	0	248	24
K00451	Amino acid metabolism;00350 Tyrosine metabolism [PATH:ko00350];HGD, hmgA; homogentisate 1,2-dioxygenase [EC:1.13.11.5]	0	24	0	0	0	55	0
K00817	Amino acid metabolism;00350 Tyrosine metabolism [PATH:ko00350];hisC; histidinol-phosphate aminotransferase [EC:2.6.1.9]	212	39	14	18	3	172	5
K00483	Amino acid metabolism;00350 Tyrosine metabolism [PATH:ko00350];hpaB; 4-hydroxyphenylacetate 3-monooxygenase [EC:1.14.14.9]	9	5	12	0	2	2	3
K00484	Amino acid metabolism;00350 Tyrosine metabolism [PATH:ko00350];hpaC; flavin reductase (NADH) [EC:1.5.1.36]	5	14	8	8	2	2	3
K00455	Amino acid metabolism;00350 Tyrosine metabolism [PATH:ko00350];hpaD, hpcB; 3,4-dihydroxyphenylacetate 2,3-dioxygenase [EC:1.13.11.15]	0	10	7	0	1	3	2
K00151	Amino acid metabolism;00350 Tyrosine metabolism [PATH:ko00350];hpaE, hpcC; 5-carboxymethyl-2-hydroxymuconic-semialdehyde dehydrogenase [EC:1.2.1.60]	19	22	12	1	0	5	4
K01826	Amino acid metabolism;00350 Tyrosine metabolism [PATH:ko00350];hpaF, hpcD; 5-carboxymethyl-2-hydroxymuconate isomerase [EC:5.3.3.10]	8	13	6	0	0	6	3
K05921	Amino acid metabolism;00350 Tyrosine metabolism [PATH:ko00350];hpaG; 5-oxopent-3-ene-1,2,5-tricarboxylate decarboxylase / 2-hydroxyhepta-2,4-diene-1,7-dioate isomerase [EC:4.1.1.68 5.3.3.-]	13	24	12	1	0	3	7
K02509	Amino acid metabolism;00350 Tyrosine metabolism [PATH:ko00350];hpaH; 2-oxo-hept-3-ene-1,7-dioate hydratase [EC:4.2.1.-]	16	12	6	0	1	3	3
K02510	Amino acid metabolism;00350 Tyrosine metabolism [PATH:ko00350];hpaI, hpcH; 4-hydroxy-2-oxoheptanedioate aldolase [EC:4.1.2.52]	33	24	17	5	1	60	4
K00457	Amino acid metabolism;00350 Tyrosine metabolism [PATH:ko00350];HPD, hppD; 4-hydroxyphenylpyruvate dioxygenase [EC:1.13.11.27]	318	96	1	12	1	149	5
K01800	Amino acid metabolism;00350 Tyrosine metabolism [PATH:ko00350];maiA, GSTZ1; maleylacetoacetate isomerase [EC:5.2.1.2]	1	4	0	0	0	30	0
K00274	Amino acid metabolism;00350 Tyrosine metabolism [PATH:ko00350];MAO, aofH; monoamine oxidase [EC:1.4.3.4]	0	10	0	0	0	145	0
K16165	Amino acid metabolism;00350 Tyrosine metabolism [PATH:ko00350];nagK; fumarylpyruvate hydrolase [EC:3.7.1.20]	0	23	0	0	1	9	0
K01801	Amino acid metabolism;00350 Tyrosine metabolism [PATH:ko00350];nagL; maleylpyruvate isomerase [EC:5.2.1.4]	0	14	1	0	0	0	0
K00505	Amino acid metabolism;00350 Tyrosine metabolism [PATH:ko00350];TYR; tyrosinase [EC:1.14.18.1]	0	2	0	0	0	1	0
K00832	Amino acid metabolism;00350 Tyrosine metabolism [PATH:ko00350];tyrB; aromatic-amino-acid transaminase [EC:2.6.1.57]	271	54	18	26	5	107	9
K13954	Amino acid metabolism;00350 Tyrosine metabolism [PATH:ko00350];yiaY; alcohol dehydrogenase [EC:1.1.1.1]	0	1	2	0	0	12	1
K00276	Amino acid metabolism;00360 Phenylalanine metabolism [PATH:ko00360];AOC3, AOC2, tynA; primary-amine oxidase [EC:1.4.3.21]	2	0	11	0	1	17	0
K00812	Amino acid metabolism;00360 Phenylalanine metabolism [PATH:ko00360];aspB; aspartate aminotransferase [EC:2.6.1.1]	64	16	6	11	8	99	10
K00813	Amino acid metabolism;00360 Phenylalanine metabolism [PATH:ko00360];aspC; aspartate aminotransferase [EC:2.6.1.1]	236	0	16	20	5	0	5
K00285	Amino acid metabolism;00360 Phenylalanine metabolism [PATH:ko00360];dadA; D-amino-acid dehydrogenase [EC:1.4.5.1]	395	139	17	10	2	129	12
K00824	Amino acid metabolism;00360 Phenylalanine metabolism [PATH:ko00360];dat; D-alanine transaminase [EC:2.6.1.21]	0	12	0	4	0	0	0
K01593	Amino acid metabolism;00360 Phenylalanine metabolism [PATH:ko00360];DDC; aromatic-L-amino-acid decarboxylase [EC:4.1.1.28]	0	18	0	0	0	0	0
K00055	Amino acid metabolism;00360 Phenylalanine metabolism [PATH:ko00360];E1.1.1.90; aryl-alcohol dehydrogenase [EC:1.1.1.90]	0	8	2	0	1	0	2
K00129	Amino acid metabolism;00360 Phenylalanine metabolism [PATH:ko00360];E1.2.1.5; aldehyde dehydrogenase (NAD(P)+) [EC:1.2.1.5]	0	0	0	0	1	0	0
K00588	Amino acid metabolism;00360 Phenylalanine metabolism [PATH:ko00360];E2.1.1.104; caffeoyl-CoA O-methyltransferase [EC:2.1.1.104]	0	6	0	1	0	0	0
K01426	Amino acid metabolism;00360 Phenylalanine metabolism [PATH:ko00360];E3.5.1.4, amiE; amidase [EC:3.5.1.4]	79	158	13	0	7	260	2
K00146	Amino acid metabolism;00360 Phenylalanine metabolism [PATH:ko00360];feaB; phenylacetaldehyde dehydrogenase [EC:1.2.1.39]	7	51	28	0	4	8	12
K05710	Amino acid metabolism;00360 Phenylalanine metabolism [PATH:ko00360];hcaC; 3-phenylpropionate/trans-cinnamate dioxygenase ferredoxin component	0	13	0	0	0	1	0
K00529	Amino acid metabolism;00360 Phenylalanine metabolism [PATH:ko00360];hcaD; 3-phenylpropionate/trans-cinnamate dioxygenase ferredoxin reductase component [EC:1.18.1.3]	0	65	5	0	0	7	3
K01451	Amino acid metabolism;00360 Phenylalanine metabolism [PATH:ko00360];hipO; hippurate hydrolase [EC:3.5.1.32]	485	130	13	21	4	157	9
K00817	Amino acid metabolism;00360 Phenylalanine metabolism [PATH:ko00360];hisC; histidinol-phosphate aminotransferase [EC:2.6.1.9]	212	39	14	18	3	172	5
K00457	Amino acid metabolism;00360 Phenylalanine metabolism [PATH:ko00360];HPD, hppD; 4-hydroxyphenylpyruvate dioxygenase [EC:1.13.11.27]	318	96	1	12	1	149	5
K18383	Amino acid metabolism;00360 Phenylalanine metabolism [PATH:ko00360];K18383; trans-feruloyl-CoA hydratase / vanillin synthase [EC:4.2.1.101 4.1.2.41]	0	17	0	0	0	53	0
K03782	Amino acid metabolism;00360 Phenylalanine metabolism [PATH:ko00360];katG; catalase-peroxidase [EC:1.11.1.21]	443	49	24	1	3	132	5
K00274	Amino acid metabolism;00360 Phenylalanine metabolism [PATH:ko00360];MAO, aofH; monoamine oxidase [EC:1.4.3.4]	0	10	0	0	0	145	0
K05712	Amino acid metabolism;00360 Phenylalanine metabolism [PATH:ko00360];mhpA; 3-(3-hydroxy-phenyl)propionate hydroxylase [EC:1.14.13.127]	0	72	0	0	0	2	0
K05713	Amino acid metabolism;00360 Phenylalanine metabolism [PATH:ko00360];mhpB; 2,3-dihydroxyphenylpropionate 1,2-dioxygenase [EC:1.13.11.16]	0	3	0	0	2	0	0
K05714	Amino acid metabolism;00360 Phenylalanine metabolism [PATH:ko00360];mhpC; 2-hydroxy-6-oxonona-2,4-dienedioate hydrolase [EC:3.7.1.14]	0	10	0	0	0	0	0
K02554	Amino acid metabolism;00360 Phenylalanine metabolism [PATH:ko00360];mhpD; 2-keto-4-pentenoate hydratase [EC:4.2.1.80]	0	11	0	0	0	6	0
K01666	Amino acid metabolism;00360 Phenylalanine metabolism [PATH:ko00360];mhpE; 4-hydroxy 2-oxovalerate aldolase [EC:4.1.3.39]	0	12	0	0	0	3	0
K04073	Amino acid metabolism;00360 Phenylalanine metabolism [PATH:ko00360];mhpF; acetaldehyde dehydrogenase [EC:1.2.1.10]	0	12	0	0	0	0	0
K02609	Amino acid metabolism;00360 Phenylalanine metabolism [PATH:ko00360];paaA; ring-1,2-phenylacetyl-CoA epoxidase subunit PaaA [EC:1.14.13.149]	0	20	31	4	0	6	4
K02610	Amino acid metabolism;00360 Phenylalanine metabolism [PATH:ko00360];paaB; ring-1,2-phenylacetyl-CoA epoxidase subunit PaaB	0	6	6	0	6	2	3
K02611	Amino acid metabolism;00360 Phenylalanine metabolism [PATH:ko00360];paaC; ring-1,2-phenylacetyl-CoA epoxidase subunit PaaC [EC:1.14.13.149]	19	14	7	0	0	7	3
K02612	Amino acid metabolism;00360 Phenylalanine metabolism [PATH:ko00360];paaD; ring-1,2-phenylacetyl-CoA epoxidase subunit PaaD	0	12	26	0	7	8	4
K02613	Amino acid metabolism;00360 Phenylalanine metabolism [PATH:ko00360];paaE; ring-1,2-phenylacetyl-CoA epoxidase subunit PaaE	0	17	37	0	2	9	3
K01692	Amino acid metabolism;00360 Phenylalanine metabolism [PATH:ko00360];paaF, echA; enoyl-CoA hydratase [EC:4.2.1.17]	4	60	11	0	0	83	6
K15866	Amino acid metabolism;00360 Phenylalanine metabolism [PATH:ko00360];paaG; 2-(1,2-epoxy-1,2-dihydrophenyl)acetyl-CoA isomerase [EC:5.3.3.18]	0	22	24	0	0	9	3
K00074	Amino acid metabolism;00360 Phenylalanine metabolism [PATH:ko00360];paaH, hbd, fadB, mmgB; 3-hydroxybutyryl-CoA dehydrogenase [EC:1.1.1.157]	1	47	14	0	19	83	13
K02614	Amino acid metabolism;00360 Phenylalanine metabolism [PATH:ko00360];paaI; acyl-CoA thioesterase [EC:3.1.2.-]	0	12	7	0	0	52	3
K02615	Amino acid metabolism;00360 Phenylalanine metabolism [PATH:ko00360];paaJ; 3-oxo-5,6-didehydrosuberyl-CoA/3-oxoadipyl-CoA thiolase [EC:2.3.1.223 2.3.1.174]	5	0	38	0	3	0	4
K01912	Amino acid metabolism;00360 Phenylalanine metabolism [PATH:ko00360];paaK; phenylacetate-CoA ligase [EC:6.2.1.30]	20	67	32	1	6	7	4
K02618	Amino acid metabolism;00360 Phenylalanine metabolism [PATH:ko00360];paaZ; oxepin-CoA hydrolase / 3-oxo-5,6-dehydrosuberyl-CoA semialdehyde dehydrogenase [EC:3.3.2.12 1.2.1.91]	0	0	38	0	14	13	3
K00500	Amino acid metabolism;00360 Phenylalanine metabolism [PATH:ko00360];phhA, PAH; phenylalanine-4-hydroxylase [EC:1.14.16.1]	0	25	0	0	0	7	0
K00832	Amino acid metabolism;00360 Phenylalanine metabolism [PATH:ko00360];tyrB; aromatic-amino-acid transaminase [EC:2.6.1.57]	271	54	18	26	5	107	9
K03392	Amino acid metabolism;00380 Tryptophan metabolism [PATH:ko00380];ACMSD; aminocarboxymuconate-semialdehyde decarboxylase [EC:4.1.1.45]	0	13	0	0	2	0	1
K01432	Amino acid metabolism;00380 Tryptophan metabolism [PATH:ko00380];AFMID; arylformamidase [EC:3.5.1.9]	0	0	0	0	0	1	2
K00128	Amino acid metabolism;00380 Tryptophan metabolism [PATH:ko00380];ALDH; aldehyde dehydrogenase (NAD+) [EC:1.2.1.3]	493	198	17	30	3	457	2
K15067	Amino acid metabolism;00380 Tryptophan metabolism [PATH:ko00380];amnD; 2-aminomuconate deaminase [EC:3.5.99.5]	0	3	0	0	0	0	0
K00543	Amino acid metabolism;00380 Tryptophan metabolism [PATH:ko00380];ASMT; acetylserotonin N-methyltransferase [EC:2.1.1.4]	0	0	0	0	0	0	3
K14338	Amino acid metabolism;00380 Tryptophan metabolism [PATH:ko00380];cypD_E, CYP102A2_3; cytochrome P450 / NADPH-cytochrome P450 reductase [EC:1.14.14.1 1.6.2.4]	0	20	0	0	0	0	0
K01593	Amino acid metabolism;00380 Tryptophan metabolism [PATH:ko00380];DDC; aromatic-L-amino-acid decarboxylase [EC:4.1.1.28]	0	18	0	0	0	0	0
K10217	Amino acid metabolism;00380 Tryptophan metabolism [PATH:ko00380];dmpC, xylG, praB; aminomuconate-semialdehyde/2-hydroxymuconate-6-semialdehyde dehydrogenase [EC:1.2.1.32 1.2.1.85]	0	4	0	0	0	0	0
K00493	Amino acid metabolism;00380 Tryptophan metabolism [PATH:ko00380];E1.14.14.1; unspecific monooxygenase [EC:1.14.14.1]	0	11	0	0	0	0	0
K00626	Amino acid metabolism;00380 Tryptophan metabolism [PATH:ko00380];E2.3.1.9, atoB; acetyl-CoA C-acetyltransferase [EC:2.3.1.9]	18	199	27	0	15	331	10
K01426	Amino acid metabolism;00380 Tryptophan metabolism [PATH:ko00380];E3.5.1.4, amiE; amidase [EC:3.5.1.4]	79	158	13	0	7	260	2
K01501	Amino acid metabolism;00380 Tryptophan metabolism [PATH:ko00380];E3.5.5.1; nitrilase [EC:3.5.5.1]	8	27	0	8	0	10	0
K01825	Amino acid metabolism;00380 Tryptophan metabolism [PATH:ko00380];fadB; 3-hydroxyacyl-CoA dehydrogenase / enoyl-CoA hydratase / 3-hydroxybutyryl-CoA epimerase / enoyl-CoA isomerase [EC:1.1.1.35 4.2.1.17 5.1.2.3 5.3.3.8]	422	2	30	21	5	138	8
K01782	Amino acid metabolism;00380 Tryptophan metabolism [PATH:ko00380];fadJ; 3-hydroxyacyl-CoA dehydrogenase / enoyl-CoA hydratase / 3-hydroxybutyryl-CoA epimerase [EC:1.1.1.35 4.2.1.17 5.1.2.3]	417	0	24	16	5	35	8
K00252	Amino acid metabolism;00380 Tryptophan metabolism [PATH:ko00380];GCDH, gcdH; glutaryl-CoA dehydrogenase [EC:1.3.8.6]	0	23	0	0	0	13	0
K00452	Amino acid metabolism;00380 Tryptophan metabolism [PATH:ko00380];HAAO; 3-hydroxyanthranilate 3,4-dioxygenase [EC:1.13.11.6]	0	1	0	0	0	0	0
K00466	Amino acid metabolism;00380 Tryptophan metabolism [PATH:ko00380];iaaM; tryptophan 2-monooxygenase [EC:1.13.12.3]	8	0	0	0	0	39	0
K04103	Amino acid metabolism;00380 Tryptophan metabolism [PATH:ko00380];ipdC; indolepyruvate decarboxylase [EC:4.1.1.74]	322	3	18	14	1	0	9
K03781	Amino acid metabolism;00380 Tryptophan metabolism [PATH:ko00380];katE, CAT, catB, srpA; catalase [EC:1.11.1.6]	533	92	40	31	6	337	4
K03782	Amino acid metabolism;00380 Tryptophan metabolism [PATH:ko00380];katG; catalase-peroxidase [EC:1.11.1.21]	443	49	24	1	3	132	5
K07130	Amino acid metabolism;00380 Tryptophan metabolism [PATH:ko00380];kynB; arylformamidase [EC:3.5.1.9]	0	14	0	0	0	0	0
K01556	Amino acid metabolism;00380 Tryptophan metabolism [PATH:ko00380];KYNU, kynU; kynureninase [EC:3.7.1.3]	0	38	0	0	0	0	0
K00274	Amino acid metabolism;00380 Tryptophan metabolism [PATH:ko00380];MAO, aofH; monoamine oxidase [EC:1.4.3.4]	0	10	0	0	0	145	0
K01721	Amino acid metabolism;00380 Tryptophan metabolism [PATH:ko00380];nthA; nitrile hydratase subunit alpha [EC:4.2.1.84]	11	9	9	1	4	63	2
K00164	Amino acid metabolism;00380 Tryptophan metabolism [PATH:ko00380];OGDH, sucA; 2-oxoglutarate dehydrogenase E1 component [EC:1.2.4.2]	391	50	38	28	3	153	8
K01692	Amino acid metabolism;00380 Tryptophan metabolism [PATH:ko00380];paaF, echA; enoyl-CoA hydratase [EC:4.2.1.17]	4	60	11	0	0	83	6
K00453	Amino acid metabolism;00380 Tryptophan metabolism [PATH:ko00380];TDO2, kynA; tryptophan 2,3-dioxygenase [EC:1.13.11.11]	0	23	0	0	0	0	3
K01667	Amino acid metabolism;00380 Tryptophan metabolism [PATH:ko00380];tnaA; tryptophanase [EC:4.1.99.1]	149	0	0	0	0	0	0
K00800	Amino acid metabolism;00400 Phenylalanine, tyrosine and tryptophan biosynthesis [PATH:ko00400];aroA; 3-phosphoshikimate 1-carboxyvinyltransferase [EC:2.5.1.19]	235	32	17	16	0	180	4
K01735	Amino acid metabolism;00400 Phenylalanine, tyrosine and tryptophan biosynthesis [PATH:ko00400];aroB; 3-dehydroquinate synthase [EC:4.2.3.4]	230	29	17	12	6	72	4
K01736	Amino acid metabolism;00400 Phenylalanine, tyrosine and tryptophan biosynthesis [PATH:ko00400];aroC; chorismate synthase [EC:4.2.3.5]	203	17	26	10	4	64	4
K03785	Amino acid metabolism;00400 Phenylalanine, tyrosine and tryptophan biosynthesis [PATH:ko00400];aroD; 3-dehydroquinate dehydratase I [EC:4.2.1.10]	33	1	1	8	1	1	0
K00014	Amino acid metabolism;00400 Phenylalanine, tyrosine and tryptophan biosynthesis [PATH:ko00400];aroE; shikimate dehydrogenase [EC:1.1.1.25]	204	69	15	19	1	265	4
K03786	Amino acid metabolism;00400 Phenylalanine, tyrosine and tryptophan biosynthesis [PATH:ko00400];aroQ, qutE; 3-dehydroquinate dehydratase II [EC:4.2.1.10]	106	21	15	12	3	141	3
K00812	Amino acid metabolism;00400 Phenylalanine, tyrosine and tryptophan biosynthesis [PATH:ko00400];aspB; aspartate aminotransferase [EC:2.6.1.1]	64	16	6	11	8	99	10
K00813	Amino acid metabolism;00400 Phenylalanine, tyrosine and tryptophan biosynthesis [PATH:ko00400];aspC; aspartate aminotransferase [EC:2.6.1.1]	236	0	16	20	5	0	5
K01626	Amino acid metabolism;00400 Phenylalanine, tyrosine and tryptophan biosynthesis [PATH:ko00400];E2.5.1.54, aroF, aroG, aroH; 3-deoxy-7-phosphoheptulonate synthase [EC:2.5.1.54]	620	58	49	44	7	207	16
K00891	Amino acid metabolism;00400 Phenylalanine, tyrosine and tryptophan biosynthesis [PATH:ko00400];E2.7.1.71, aroK, aroL; shikimate kinase [EC:2.7.1.71]	237	15	24	22	6	38	4
K00817	Amino acid metabolism;00400 Phenylalanine, tyrosine and tryptophan biosynthesis [PATH:ko00400];hisC; histidinol-phosphate aminotransferase [EC:2.6.1.9]	212	39	14	18	3	172	5
K14170	Amino acid metabolism;00400 Phenylalanine, tyrosine and tryptophan biosynthesis [PATH:ko00400];pheA; chorismate mutase / prephenate dehydratase [EC:5.4.99.5 4.2.1.51]	234	23	10	7	6	89	5
K04093	Amino acid metabolism;00400 Phenylalanine, tyrosine and tryptophan biosynthesis [PATH:ko00400];pheA1; chorismate mutase [EC:5.4.99.5]	110	18	1	0	2	79	3
K04518	Amino acid metabolism;00400 Phenylalanine, tyrosine and tryptophan biosynthesis [PATH:ko00400];pheA2; prephenate dehydratase [EC:4.2.1.51]	0	1	0	0	0	0	0
K01713	Amino acid metabolism;00400 Phenylalanine, tyrosine and tryptophan biosynthesis [PATH:ko00400];pheC; cyclohexadienyl dehydratase [EC:4.2.1.51 4.2.1.91]	233	13	1	1	3	10	3
K00500	Amino acid metabolism;00400 Phenylalanine, tyrosine and tryptophan biosynthesis [PATH:ko00400];phhA, PAH; phenylalanine-4-hydroxylase [EC:1.14.16.1]	0	25	0	0	0	7	0
K05358	Amino acid metabolism;00400 Phenylalanine, tyrosine and tryptophan biosynthesis [PATH:ko00400];quiA; quinate dehydrogenase (quinone) [EC:1.1.5.8]	501	5	27	26	2	93	10
K09483	Amino acid metabolism;00400 Phenylalanine, tyrosine and tryptophan biosynthesis [PATH:ko00400];quiC; 3-dehydroshikimate dehydratase [EC:4.2.1.118]	1	0	0	0	0	0	0
K01695	Amino acid metabolism;00400 Phenylalanine, tyrosine and tryptophan biosynthesis [PATH:ko00400];trpA; tryptophan synthase alpha chain [EC:4.2.1.20]	189	13	13	6	1	87	6
K01696	Amino acid metabolism;00400 Phenylalanine, tyrosine and tryptophan biosynthesis [PATH:ko00400];trpB; tryptophan synthase beta chain [EC:4.2.1.20]	227	27	8	17	6	102	5
K01609	Amino acid metabolism;00400 Phenylalanine, tyrosine and tryptophan biosynthesis [PATH:ko00400];trpC; indole-3-glycerol phosphate synthase [EC:4.1.1.48]	0	18	0	0	1	66	0
K13498	Amino acid metabolism;00400 Phenylalanine, tyrosine and tryptophan biosynthesis [PATH:ko00400];trpCF; indole-3-glycerol phosphate synthase / phosphoribosylanthranilate isomerase [EC:4.1.1.48 5.3.1.24]	227	0	19	17	2	0	3
K00766	Amino acid metabolism;00400 Phenylalanine, tyrosine and tryptophan biosynthesis [PATH:ko00400];trpD; anthranilate phosphoribosyltransferase [EC:2.4.2.18]	174	18	3	10	0	76	8
K01657	Amino acid metabolism;00400 Phenylalanine, tyrosine and tryptophan biosynthesis [PATH:ko00400];trpE; anthranilate synthase component I [EC:4.1.3.27]	265	27	25	16	0	100	4
K01817	Amino acid metabolism;00400 Phenylalanine, tyrosine and tryptophan biosynthesis [PATH:ko00400];trpF; phosphoribosylanthranilate isomerase [EC:5.3.1.24]	0	12	0	0	0	54	0
K01658	Amino acid metabolism;00400 Phenylalanine, tyrosine and tryptophan biosynthesis [PATH:ko00400];trpG; anthranilate synthase component II [EC:4.1.3.27]	83	16	0	7	0	71	6
K13497	Amino acid metabolism;00400 Phenylalanine, tyrosine and tryptophan biosynthesis [PATH:ko00400];trpGD; anthranilate synthase/phosphoribosyltransferase [EC:4.1.3.27 2.4.2.18]	56	0	18	0	3	0	0
K14187	Amino acid metabolism;00400 Phenylalanine, tyrosine and tryptophan biosynthesis [PATH:ko00400];tyrA; chorismate mutase / prephenate dehydrogenase [EC:5.4.99.5 1.3.1.12]	210	0	17	15	1	0	4
K04092	Amino acid metabolism;00400 Phenylalanine, tyrosine and tryptophan biosynthesis [PATH:ko00400];tyrA1; chorismate mutase [EC:5.4.99.5]	3	0	0	0	0	3	0
K04517	Amino acid metabolism;00400 Phenylalanine, tyrosine and tryptophan biosynthesis [PATH:ko00400];tyrA2; prephenate dehydrogenase [EC:1.3.1.12]	0	16	0	0	0	1	0
K00832	Amino acid metabolism;00400 Phenylalanine, tyrosine and tryptophan biosynthesis [PATH:ko00400];tyrB; aromatic-amino-acid transaminase [EC:2.6.1.57]	271	54	18	26	5	107	9
K00133	Biosynthesis of other secondary metabolites;00261 Monobactam biosynthesis [PATH:ko00261];asd; aspartate-semialdehyde dehydrogenase [EC:1.2.1.11]	228	24	16	19	4	79	4
K00957	Biosynthesis of other secondary metabolites;00261 Monobactam biosynthesis [PATH:ko00261];cysD; sulfate adenylyltransferase subunit 2 [EC:2.7.7.4]	130	21	9	30	6	62	3
K00956	Biosynthesis of other secondary metabolites;00261 Monobactam biosynthesis [PATH:ko00261];cysN; sulfate adenylyltransferase subunit 1 [EC:2.7.7.4]	265	28	17	18	1	0	4
K00955	Biosynthesis of other secondary metabolites;00261 Monobactam biosynthesis [PATH:ko00261];cysNC; bifunctional enzyme CysN/CysC [EC:2.7.7.4 2.7.1.25]	0	16	0	0	0	122	0
K01714	Biosynthesis of other secondary metabolites;00261 Monobactam biosynthesis [PATH:ko00261];dapA; 4-hydroxy-tetrahydrodipicolinate synthase [EC:4.3.3.7]	697	136	63	38	42	267	18
K00215	Biosynthesis of other secondary metabolites;00261 Monobactam biosynthesis [PATH:ko00261];dapB; 4-hydroxy-tetrahydrodipicolinate reductase [EC:1.17.1.8]	202	11	18	15	2	78	4
K16422	Biosynthesis of other secondary metabolites;00261 Monobactam biosynthesis [PATH:ko00261];hmo, nocN; 4-hydroxymandelate oxidase [EC:1.1.3.46]	18	0	0	0	0	0	0
K16423	Biosynthesis of other secondary metabolites;00261 Monobactam biosynthesis [PATH:ko00261];hpgT, nocG; (S)-3,5-dihydroxyphenylglycine transaminase [EC:2.6.1.103]	0	1	0	0	0	0	0
K00928	Biosynthesis of other secondary metabolites;00261 Monobactam biosynthesis [PATH:ko00261];lysC; aspartate kinase [EC:2.7.2.4]	273	35	22	17	1	84	4
K05375	Biosynthesis of other secondary metabolites;00261 Monobactam biosynthesis [PATH:ko00261];mbtH, nocI; MbtH protein	42	11	5	0	1	44	6
K12525	Biosynthesis of other secondary metabolites;00261 Monobactam biosynthesis [PATH:ko00261];metL; bifunctional aspartokinase / homoserine dehydrogenase 2 [EC:2.7.2.4 1.1.1.3]	433	0	31	20	11	0	3
K19104	Biosynthesis of other secondary metabolites;00261 Monobactam biosynthesis [PATH:ko00261];nat; isonocardicin synthase [EC:2.5.1.38]	5	0	0	0	0	0	0
K19112	Biosynthesis of other secondary metabolites;00261 Monobactam biosynthesis [PATH:ko00261];tblF, tabS; L-Amino acid ligase [EC:6.3.2.-]	4	0	0	0	0	0	0
K12524	Biosynthesis of other secondary metabolites;00261 Monobactam biosynthesis [PATH:ko00261];thrA; bifunctional aspartokinase / homoserine dehydrogenase 1 [EC:2.7.2.4 1.1.1.3]	442	0	25	18	10	0	5
K19113	Biosynthesis of other secondary metabolites;00261 Monobactam biosynthesis [PATH:ko00261];ttr; acetyltransferase [EC:2.3.1.-]	0	0	0	0	0	8	0
K04128	Biosynthesis of other secondary metabolites;00311 Penicillin and cephalosporin biosynthesis [PATH:ko00311];cmcH; hydroxymethyl cephem carbamoyltransferase [EC:2.1.3.7]	0	3	0	0	0	3	0
K01434	Biosynthesis of other secondary metabolites;00311 Penicillin and cephalosporin biosynthesis [PATH:ko00311];E3.5.1.11; penicillin amidase [EC:3.5.1.11]	0	7	0	0	0	51	9
K19200	Biosynthesis of other secondary metabolites;00311 Penicillin and cephalosporin biosynthesis [PATH:ko00311];IAL; isopenicillin-N N-acyltransferase like protein	0	5	0	0	0	0	0
K17836	Biosynthesis of other secondary metabolites;00311 Penicillin and cephalosporin biosynthesis [PATH:ko00311];penP; beta-lactamase class A [EC:3.5.2.6]	181	43	4	9	2	13	3
K00147	Biosynthesis of other secondary metabolites;00332 Carbapenem biosynthesis [PATH:ko00332];proA; glutamate-5-semialdehyde dehydrogenase [EC:1.2.1.41]	263	24	16	11	4	82	4
K00931	Biosynthesis of other secondary metabolites;00332 Carbapenem biosynthesis [PATH:ko00332];proB; glutamate 5-kinase [EC:2.7.2.11]	201	29	15	15	3	83	6
K00645	Biosynthesis of other secondary metabolites;00333 Prodigiosin biosyntheses [PATH:ko00333];fabD; [acyl-carrier-protein] S-malonyltransferase [EC:2.3.1.39]	185	36	20	14	0	62	3
K00059	Biosynthesis of other secondary metabolites;00333 Prodigiosin biosyntheses [PATH:ko00333];fabG; 3-oxoacyl-[acyl-carrier protein] reductase [EC:1.1.1.100]	576	208	61	31	36	328	30
K00208	Biosynthesis of other secondary metabolites;00333 Prodigiosin biosyntheses [PATH:ko00333];fabI; enoyl-[acyl-carrier protein] reductase I [EC:1.3.1.9 1.3.1.10]	116	5	14	2	0	45	0
K00812	Biosynthesis of other secondary metabolites;00401 Novobiocin biosynthesis [PATH:ko00401];aspB; aspartate aminotransferase [EC:2.6.1.1]	64	16	6	11	8	99	10
K00813	Biosynthesis of other secondary metabolites;00401 Novobiocin biosynthesis [PATH:ko00401];aspC; aspartate aminotransferase [EC:2.6.1.1]	236	0	16	20	5	0	5
K00817	Biosynthesis of other secondary metabolites;00401 Novobiocin biosynthesis [PATH:ko00401];hisC; histidinol-phosphate aminotransferase [EC:2.6.1.9]	212	39	14	18	3	172	5
K14187	Biosynthesis of other secondary metabolites;00401 Novobiocin biosynthesis [PATH:ko00401];tyrA; chorismate mutase / prephenate dehydrogenase [EC:5.4.99.5 1.3.1.12]	210	0	17	15	1	0	4
K04517	Biosynthesis of other secondary metabolites;00401 Novobiocin biosynthesis [PATH:ko00401];tyrA2; prephenate dehydrogenase [EC:1.3.1.12]	0	16	0	0	0	1	0
K00832	Biosynthesis of other secondary metabolites;00401 Novobiocin biosynthesis [PATH:ko00401];tyrB; aromatic-amino-acid transaminase [EC:2.6.1.57]	271	54	18	26	5	107	9
K14257	Biosynthesis of other secondary metabolites;00404 Staurosporine biosynthesis [PATH:ko00404];ctcP, cts4, prnC; tetracycline 7-halogenase / FADH2 O2-dependent halogenase [EC:1.14.19.49 1.14.19.-]	0	17	0	0	0	1	0
K14266	Biosynthesis of other secondary metabolites;00404 Staurosporine biosynthesis [PATH:ko00404];prnA, rebH; tryptophan halogenase [EC:1.14.19.9]	0	6	0	0	0	1	0
K13063	Biosynthesis of other secondary metabolites;00405 Phenazine biosynthesis [PATH:ko00405];phzE; 2-amino-4-deoxychorismate synthase [EC:2.6.1.86]	5	11	0	0	0	0	0
K06998	Biosynthesis of other secondary metabolites;00405 Phenazine biosynthesis [PATH:ko00405];phzF; trans-2,3-dihydro-3-hydroxyanthranilate isomerase [EC:5.3.3.17]	4	6	1	0	0	1	0
K01657	Biosynthesis of other secondary metabolites;00405 Phenazine biosynthesis [PATH:ko00405];trpE; anthranilate synthase component I [EC:4.1.3.27]	265	27	25	16	0	100	4
K01658	Biosynthesis of other secondary metabolites;00405 Phenazine biosynthesis [PATH:ko00405];trpG; anthranilate synthase component II [EC:4.1.3.27]	83	16	0	7	0	71	6
K00973	Biosynthesis of other secondary metabolites;00521 Streptomycin biosynthesis [PATH:ko00521];E2.7.7.24, rfbA, rffH; glucose-1-phosphate thymidylyltransferase [EC:2.7.7.24]	208	38	28	17	3	76	6
K01092	Biosynthesis of other secondary metabolites;00521 Streptomycin biosynthesis [PATH:ko00521];E3.1.3.25, IMPA, suhB; myo-inositol-1(or 4)-monophosphatase [EC:3.1.3.25]	561	15	18	11	11	187	7
K01710	Biosynthesis of other secondary metabolites;00521 Streptomycin biosynthesis [PATH:ko00521];E4.2.1.46, rfbB, rffG; dTDP-glucose 4,6-dehydratase [EC:4.2.1.46]	213	30	21	14	3	111	8
K00845	Biosynthesis of other secondary metabolites;00521 Streptomycin biosynthesis [PATH:ko00521];glk; glucokinase [EC:2.7.1.2]	212	35	17	11	1	83	3
K00010	Biosynthesis of other secondary metabolites;00521 Streptomycin biosynthesis [PATH:ko00521];iolG; myo-inositol 2-dehydrogenase / D-chiro-inositol 1-dehydrogenase [EC:1.1.1.18 1.1.1.369]	468	40	15	29	19	85	12
K01835	Biosynthesis of other secondary metabolites;00521 Streptomycin biosynthesis [PATH:ko00521];pgm; phosphoglucomutase [EC:5.4.2.2]	303	0	25	37	8	111	6
K15778	Biosynthesis of other secondary metabolites;00521 Streptomycin biosynthesis [PATH:ko00521];pmm-pgm; phosphomannomutase / phosphoglucomutase [EC:5.4.2.8 5.4.2.2]	0	30	0	0	0	224	0
K01790	Biosynthesis of other secondary metabolites;00521 Streptomycin biosynthesis [PATH:ko00521];rfbC, rmlC; dTDP-4-dehydrorhamnose 3,5-epimerase [EC:5.1.3.13]	63	16	22	8	0	55	5
K00067	Biosynthesis of other secondary metabolites;00521 Streptomycin biosynthesis [PATH:ko00521];rfbD, rmlD; dTDP-4-dehydrorhamnose reductase [EC:1.1.1.133]	146	41	9	17	1	220	7
K00845	Biosynthesis of other secondary metabolites;00524 Neomycin, kanamycin and gentamicin biosynthesis [PATH:ko00524];glk; glucokinase [EC:2.7.1.2]	212	35	17	11	1	83	3
K00973	Biosynthesis of other secondary metabolites;00525 Acarbose and validamycin biosynthesis [PATH:ko00525];E2.7.7.24, rfbA, rffH; glucose-1-phosphate thymidylyltransferase [EC:2.7.7.24]	208	38	28	17	3	76	6
K01710	Biosynthesis of other secondary metabolites;00525 Acarbose and validamycin biosynthesis [PATH:ko00525];E4.2.1.46, rfbB, rffG; dTDP-glucose 4,6-dehydratase [EC:4.2.1.46]	213	30	21	14	3	111	8
K01593	Biosynthesis of other secondary metabolites;00901 Indole alkaloid biosynthesis [PATH:ko00901];DDC; aromatic-L-amino-acid decarboxylase [EC:4.1.1.28]	0	18	0	0	0	0	0
K05350	Biosynthesis of other secondary metabolites;00940 Phenylpropanoid biosynthesis [PATH:ko00940];bglB; beta-glucosidase [EC:3.2.1.21]	1	6	9	0	1	0	1
K05349	Biosynthesis of other secondary metabolites;00940 Phenylpropanoid biosynthesis [PATH:ko00940];bglX; beta-glucosidase [EC:3.2.1.21]	601	62	49	48	12	156	9
K00588	Biosynthesis of other secondary metabolites;00940 Phenylpropanoid biosynthesis [PATH:ko00940];E2.1.1.104; caffeoyl-CoA O-methyltransferase [EC:2.1.1.104]	0	6	0	1	0	0	0
K03782	Biosynthesis of other secondary metabolites;00940 Phenylpropanoid biosynthesis [PATH:ko00940];katG; catalase-peroxidase [EC:1.11.1.21]	443	49	24	1	3	132	5
K03186	Biosynthesis of other secondary metabolites;00940 Phenylpropanoid biosynthesis [PATH:ko00940];ubiX, bsdB, PAD1; flavin prenyltransferase [EC:2.5.1.129]	228	28	32	12	3	78	5
K00588	Biosynthesis of other secondary metabolites;00941 Flavonoid biosynthesis [PATH:ko00941];E2.1.1.104; caffeoyl-CoA O-methyltransferase [EC:2.1.1.104]	0	6	0	1	0	0	0
K05281	Biosynthesis of other secondary metabolites;00943 Isoflavonoid biosynthesis [PATH:ko00943];E1.3.1.45; 2'-hydroxyisoflavone reductase [EC:1.3.1.45]	0	2	0	0	0	0	0
K01195	Biosynthesis of other secondary metabolites;00944 Flavone and flavonol biosynthesis [PATH:ko00944];uidA, GUSB; beta-glucuronidase [EC:3.2.1.31]	3	0	0	0	0	0	0
K00517	Biosynthesis of other secondary metabolites;00945 Stilbenoid, diarylheptanoid and gingerol biosynthesis [PATH:ko00945];E1.14.-.-;	27	14	2	1	0	8	0
K00588	Biosynthesis of other secondary metabolites;00945 Stilbenoid, diarylheptanoid and gingerol biosynthesis [PATH:ko00945];E2.1.1.104; caffeoyl-CoA O-methyltransferase [EC:2.1.1.104]	0	6	0	1	0	0	0
K00276	Biosynthesis of other secondary metabolites;00950 Isoquinoline alkaloid biosynthesis [PATH:ko00950];AOC3, AOC2, tynA; primary-amine oxidase [EC:1.4.3.21]	2	0	11	0	1	17	0
K00812	Biosynthesis of other secondary metabolites;00950 Isoquinoline alkaloid biosynthesis [PATH:ko00950];aspB; aspartate aminotransferase [EC:2.6.1.1]	64	16	6	11	8	99	10
K00813	Biosynthesis of other secondary metabolites;00950 Isoquinoline alkaloid biosynthesis [PATH:ko00950];aspC; aspartate aminotransferase [EC:2.6.1.1]	236	0	16	20	5	0	5
K01593	Biosynthesis of other secondary metabolites;00950 Isoquinoline alkaloid biosynthesis [PATH:ko00950];DDC; aromatic-L-amino-acid decarboxylase [EC:4.1.1.28]	0	18	0	0	0	0	0
K00274	Biosynthesis of other secondary metabolites;00950 Isoquinoline alkaloid biosynthesis [PATH:ko00950];MAO, aofH; monoamine oxidase [EC:1.4.3.4]	0	10	0	0	0	145	0
K03378	Biosynthesis of other secondary metabolites;00950 Isoquinoline alkaloid biosynthesis [PATH:ko00950];morA; morphine 6-dehydrogenase [EC:1.1.1.218]	0	0	0	0	0	1	0
K00505	Biosynthesis of other secondary metabolites;00950 Isoquinoline alkaloid biosynthesis [PATH:ko00950];TYR; tyrosinase [EC:1.14.18.1]	0	2	0	0	0	1	0
K00832	Biosynthesis of other secondary metabolites;00950 Isoquinoline alkaloid biosynthesis [PATH:ko00950];tyrB; aromatic-amino-acid transaminase [EC:2.6.1.57]	271	54	18	26	5	107	9
K00276	Biosynthesis of other secondary metabolites;00960 Tropane, piperidine and pyridine alkaloid biosynthesis [PATH:ko00960];AOC3, AOC2, tynA; primary-amine oxidase [EC:1.4.3.21]	2	0	11	0	1	17	0
K00812	Biosynthesis of other secondary metabolites;00960 Tropane, piperidine and pyridine alkaloid biosynthesis [PATH:ko00960];aspB; aspartate aminotransferase [EC:2.6.1.1]	64	16	6	11	8	99	10
K00813	Biosynthesis of other secondary metabolites;00960 Tropane, piperidine and pyridine alkaloid biosynthesis [PATH:ko00960];aspC; aspartate aminotransferase [EC:2.6.1.1]	236	0	16	20	5	0	5
K13609	Biosynthesis of other secondary metabolites;00960 Tropane, piperidine and pyridine alkaloid biosynthesis [PATH:ko00960];dpkA, lhpD; delta1-piperideine-2-carboxylate reductase [EC:1.5.1.21]	0	0	0	0	0	17	0
K01582	Biosynthesis of other secondary metabolites;00960 Tropane, piperidine and pyridine alkaloid biosynthesis [PATH:ko00960];E4.1.1.18, ldcC, cadA; lysine decarboxylase [EC:4.1.1.18]	384	19	32	20	3	34	12
K00817	Biosynthesis of other secondary metabolites;00960 Tropane, piperidine and pyridine alkaloid biosynthesis [PATH:ko00960];hisC; histidinol-phosphate aminotransferase [EC:2.6.1.9]	212	39	14	18	3	172	5
K00808	Biosynthesis of other secondary metabolites;00960 Tropane, piperidine and pyridine alkaloid biosynthesis [PATH:ko00960];hss; homospermidine synthase [EC:2.5.1.44]	0	0	0	0	0	1	0
K19743	Biosynthesis of other secondary metabolites;00960 Tropane, piperidine and pyridine alkaloid biosynthesis [PATH:ko00960];lhpI; 1-piperideine-2-carboxylate/1-pyrroline-2-carboxylate reductase [NAD(P)H] [EC:1.5.1.1]	0	14	0	0	0	0	0
K00832	Biosynthesis of other secondary metabolites;00960 Tropane, piperidine and pyridine alkaloid biosynthesis [PATH:ko00960];tyrB; aromatic-amino-acid transaminase [EC:2.6.1.57]	271	54	18	26	5	107	9
K01593	Biosynthesis of other secondary metabolites;00965 Betalain biosynthesis [PATH:ko00965];DDC; aromatic-L-amino-acid decarboxylase [EC:4.1.1.28]	0	18	0	0	0	0	0
K15777	Biosynthesis of other secondary metabolites;00965 Betalain biosynthesis [PATH:ko00965];DOPA; 4,5-DOPA dioxygenase extradiol [EC:1.13.11.-]	197	23	15	11	3	52	5
K00505	Biosynthesis of other secondary metabolites;00965 Betalain biosynthesis [PATH:ko00965];TYR; tyrosinase [EC:1.14.18.1]	0	2	0	0	0	1	0
K01703	Biosynthesis of other secondary metabolites;00966 Glucosinolate biosynthesis [PATH:ko00966];leuC, IPMI-L; 3-isopropylmalate/(R)-2-methylmalate dehydratase large subunit [EC:4.2.1.33 4.2.1.35]	304	37	17	22	5	114	4
K08738	Cancers;05200 Pathways in cancer [PATH:ko05200];CYC; cytochrome c	0	34	0	0	0	40	0
K01679	Cancers;05200 Pathways in cancer [PATH:ko05200];E4.2.1.2B, fumC; fumarate hydratase, class II [EC:4.2.1.2]	276	25	19	11	0	122	5
K04079	Cancers;05200 Pathways in cancer [PATH:ko05200];HSP90A, htpG; molecular chaperone HtpG	301	32	21	25	0	91	5
K12823	Cancers;05202 Transcriptional misregulation in cancers [PATH:ko05202];DDX5, DBP2; ATP-dependent RNA helicase DDX5/DBP2 [EC:3.6.4.13]	0	0	0	0	0	1	0
K00873	Cancers;05203 Viral carcinogenesis [PATH:ko05203];PK, pyk; pyruvate kinase [EC:2.7.1.40]	466	32	39	27	2	152	10
K06053	Cancers;05203 Viral carcinogenesis [PATH:ko05203];RBPSUH, RBPJK; recombining binding protein suppressor of hairless	0	1	0	0	0	0	0
K00129	Cancers;05204 Chemical carcinogenesis [PATH:ko05204];E1.2.1.5; aldehyde dehydrogenase (NAD(P)+) [EC:1.2.1.5]	0	0	0	0	1	0	0
K01253	Cancers;05204 Chemical carcinogenesis [PATH:ko05204];EPHX1; microsomal epoxide hydrolase [EC:3.3.2.9]	75	4	1	0	0	14	0
K00121	Cancers;05204 Chemical carcinogenesis [PATH:ko05204];frmA, ADH5, adhC; S-(hydroxymethyl)glutathione dehydrogenase / alcohol dehydrogenase [EC:1.1.1.284 1.1.1.1]	200	29	14	12	2	79	5
K00799	Cancers;05204 Chemical carcinogenesis [PATH:ko05204];GST, gst; glutathione S-transferase [EC:2.5.1.18]	715	258	64	63	22	553	28
K12823	Cancers;05205 Proteoglycans in cancer [PATH:ko05205];DDX5, DBP2; ATP-dependent RNA helicase DDX5/DBP2 [EC:3.6.4.13]	0	0	0	0	0	1	0
K06493	Cancers;05205 Proteoglycans in cancer [PATH:ko05205];ITGB3, CD61; integrin beta 3	0	0	1	0	0	0	0
K03685	Cancers;05205 Proteoglycans in cancer [PATH:ko05205];rnc, DROSHA, RNT1; ribonuclease III [EC:3.1.26.3]	132	21	16	11	0	50	5
K00558	Cancers;05206 MicroRNAs in cancer [PATH:ko05206];DNMT1, dcm; DNA (cytosine-5)-methyltransferase 1 [EC:2.1.1.37]	417	12	31	15	26	61	10
K01425	Cancers;05206 MicroRNAs in cancer [PATH:ko05206];glsA, GLS; glutaminase [EC:3.5.1.2]	206	20	25	0	1	80	4
K06493	Cancers;05206 MicroRNAs in cancer [PATH:ko05206];ITGB3, CD61; integrin beta 3	0	0	1	0	0	0	0
K08738	Cancers;05210 Colorectal cancer [PATH:ko05210];CYC; cytochrome c	0	34	0	0	0	40	0
K01679	Cancers;05211 Renal cell carcinoma [PATH:ko05211];E4.2.1.2B, fumC; fumarate hydratase, class II [EC:4.2.1.2]	276	25	19	11	0	122	5
K02183	Cancers;05214 Glioma [PATH:ko05214];CALM; calmodulin	0	0	0	0	0	1	0
K04079	Cancers;05215 Prostate cancer [PATH:ko05215];HSP90A, htpG; molecular chaperone HtpG	301	32	21	25	0	91	5
K00758	Cancers;05219 Bladder cancer [PATH:ko05219];deoA, TYMP; thymidine phosphorylase [EC:2.4.2.4]	262	5	16	20	4	99	3
K08738	Cancers;05222 Small cell lung cancer [PATH:ko05222];CYC; cytochrome c	0	34	0	0	0	40	0
K00036	Cancers;05230 Central carbon metabolism in cancer [PATH:ko05230];G6PD, zwf; glucose-6-phosphate 1-dehydrogenase [EC:1.1.1.49 1.1.1.363]	401	86	15	11	3	211	5
K01425	Cancers;05230 Central carbon metabolism in cancer [PATH:ko05230];glsA, GLS; glutaminase [EC:3.5.1.2]	206	20	25	0	1	80	4
K00161	Cancers;05230 Central carbon metabolism in cancer [PATH:ko05230];PDHA, pdhA; pyruvate dehydrogenase E1 component alpha subunit [EC:1.2.4.1]	0	18	3	10	4	55	0
K00162	Cancers;05230 Central carbon metabolism in cancer [PATH:ko05230];PDHB, pdhB; pyruvate dehydrogenase E1 component beta subunit [EC:1.2.4.1]	0	17	8	8	0	40	0
K00850	Cancers;05230 Central carbon metabolism in cancer [PATH:ko05230];pfkA, PFK; 6-phosphofructokinase 1 [EC:2.7.1.11]	358	0	13	29	4	0	4
K01834	Cancers;05230 Central carbon metabolism in cancer [PATH:ko05230];PGAM, gpmA; 2,3-bisphosphoglycerate-dependent phosphoglycerate mutase [EC:5.4.2.11]	133	22	13	18	0	77	3
K00873	Cancers;05230 Central carbon metabolism in cancer [PATH:ko05230];PK, pyk; pyruvate kinase [EC:2.7.1.40]	466	32	39	27	2	152	10
K00901	Cancers;05231 Choline metabolism in cancer [PATH:ko05231];dgkA, DGK; diacylglycerol kinase (ATP) [EC:2.7.1.107]	124	18	11	1	3	44	7
K01115	Cancers;05231 Choline metabolism in cancer [PATH:ko05231];PLD1_2; phospholipase D1/2 [EC:3.1.4.4]	1	6	3	0	2	0	0
K05747	Cancers;05231 Choline metabolism in cancer [PATH:ko05231];WAS; Wiskott-Aldrich syndrome protein	0	0	0	0	0	1	0
K00163	Carbohydrate metabolism;00010 Glycolysis / Gluconeogenesis [PATH:ko00010];aceE; pyruvate dehydrogenase E1 component [EC:1.2.4.1]	426	97	28	22	7	193	13
K01895	Carbohydrate metabolism;00010 Glycolysis / Gluconeogenesis [PATH:ko00010];ACSS, acs; acetyl-CoA synthetase [EC:6.2.1.1]	337	105	29	28	4	348	6
K04072	Carbohydrate metabolism;00010 Glycolysis / Gluconeogenesis [PATH:ko00010];adhE; acetaldehyde dehydrogenase / alcohol dehydrogenase [EC:1.2.1.10 1.1.1.1]	398	0	26	8	4	0	8
K13953	Carbohydrate metabolism;00010 Glycolysis / Gluconeogenesis [PATH:ko00010];adhP; alcohol dehydrogenase, propanol-preferring [EC:1.1.1.1]	100	22	21	15	8	76	7
K01085	Carbohydrate metabolism;00010 Glycolysis / Gluconeogenesis [PATH:ko00010];agp; glucose-1-phosphatase [EC:3.1.3.10]	319	0	14	15	2	0	5
K00002	Carbohydrate metabolism;00010 Glycolysis / Gluconeogenesis [PATH:ko00010];AKR1A1, adh; alcohol dehydrogenase (NADP+) [EC:1.1.1.2]	0	0	1	0	0	0	0
K00138	Carbohydrate metabolism;00010 Glycolysis / Gluconeogenesis [PATH:ko00010];aldB; aldehyde dehydrogenase [EC:1.2.1.-]	299	27	17	20	7	23	6
K00128	Carbohydrate metabolism;00010 Glycolysis / Gluconeogenesis [PATH:ko00010];ALDH; aldehyde dehydrogenase (NAD+) [EC:1.2.1.3]	493	198	17	30	3	457	2
K01623	Carbohydrate metabolism;00010 Glycolysis / Gluconeogenesis [PATH:ko00010];ALDO; fructose-bisphosphate aldolase, class I [EC:4.1.2.13]	0	11	0	0	0	0	0
K00627	Carbohydrate metabolism;00010 Glycolysis / Gluconeogenesis [PATH:ko00010];DLAT, aceF, pdhC; pyruvate dehydrogenase E2 component (dihydrolipoamide acetyltransferase) [EC:2.3.1.12]	339	49	22	14	11	197	5
K00382	Carbohydrate metabolism;00010 Glycolysis / Gluconeogenesis [PATH:ko00010];DLD, lpd, pdhD; dihydrolipoamide dehydrogenase [EC:1.8.1.4]	228	108	22	11	10	316	12
K00001	Carbohydrate metabolism;00010 Glycolysis / Gluconeogenesis [PATH:ko00010];E1.1.1.1, adh; alcohol dehydrogenase [EC:1.1.1.1]	134	42	11	1	7	144	0
K00129	Carbohydrate metabolism;00010 Glycolysis / Gluconeogenesis [PATH:ko00010];E1.2.1.5; aldehyde dehydrogenase (NAD(P)+) [EC:1.2.1.5]	0	0	0	0	1	0	0
K01222	Carbohydrate metabolism;00010 Glycolysis / Gluconeogenesis [PATH:ko00010];E3.2.1.86A, celF; 6-phospho-beta-glucosidase [EC:3.2.1.86]	32	0	26	0	16	0	6
K01223	Carbohydrate metabolism;00010 Glycolysis / Gluconeogenesis [PATH:ko00010];E3.2.1.86B, bglA; 6-phospho-beta-glucosidase [EC:3.2.1.86]	1319	0	144	22	50	0	22
K01596	Carbohydrate metabolism;00010 Glycolysis / Gluconeogenesis [PATH:ko00010];E4.1.1.32, pckA, PCK; phosphoenolpyruvate carboxykinase (GTP) [EC:4.1.1.32]	0	37	0	0	0	0	0
K01610	Carbohydrate metabolism;00010 Glycolysis / Gluconeogenesis [PATH:ko00010];E4.1.1.49, pckA; phosphoenolpyruvate carboxykinase (ATP) [EC:4.1.1.49]	374	0	41	28	15	97	7
K01792	Carbohydrate metabolism;00010 Glycolysis / Gluconeogenesis [PATH:ko00010];E5.1.3.15; glucose-6-phosphate 1-epimerase [EC:5.1.3.15]	184	0	12	6	1	105	3
K01689	Carbohydrate metabolism;00010 Glycolysis / Gluconeogenesis [PATH:ko00010];ENO, eno; enolase [EC:4.2.1.11]	154	15	21	7	4	114	10
K04022	Carbohydrate metabolism;00010 Glycolysis / Gluconeogenesis [PATH:ko00010];eutG; alcohol dehydrogenase	0	0	4	0	0	0	0
K00114	Carbohydrate metabolism;00010 Glycolysis / Gluconeogenesis [PATH:ko00010];exaA; alcohol dehydrogenase (cytochrome c) [EC:1.1.2.8]	0	16	14	0	0	3	0
K01624	Carbohydrate metabolism;00010 Glycolysis / Gluconeogenesis [PATH:ko00010];FBA, fbaA; fructose-bisphosphate aldolase, class II [EC:4.1.2.13]	801	24	50	19	17	84	3
K11645	Carbohydrate metabolism;00010 Glycolysis / Gluconeogenesis [PATH:ko00010];fbaB; fructose-bisphosphate aldolase, class I [EC:4.1.2.13]	15	1	11	10	6	0	3
K03841	Carbohydrate metabolism;00010 Glycolysis / Gluconeogenesis [PATH:ko00010];FBP, fbp; fructose-1,6-bisphosphatase I [EC:3.1.3.11]	203	28	18	31	7	78	4
K00121	Carbohydrate metabolism;00010 Glycolysis / Gluconeogenesis [PATH:ko00010];frmA, ADH5, adhC; S-(hydroxymethyl)glutathione dehydrogenase / alcohol dehydrogenase [EC:1.1.1.284 1.1.1.1]	200	29	14	12	2	79	5
K01785	Carbohydrate metabolism;00010 Glycolysis / Gluconeogenesis [PATH:ko00010];galM, GALM; aldose 1-epimerase [EC:5.1.3.3]	320	46	13	10	1	106	3
K00134	Carbohydrate metabolism;00010 Glycolysis / Gluconeogenesis [PATH:ko00010];GAPDH, gapA; glyceraldehyde 3-phosphate dehydrogenase [EC:1.2.1.12]	206	29	37	14	3	175	8
K00131	Carbohydrate metabolism;00010 Glycolysis / Gluconeogenesis [PATH:ko00010];gapN; glyceraldehyde-3-phosphate dehydrogenase (NADP+) [EC:1.2.1.9]	0	0	0	0	0	15	0
K00845	Carbohydrate metabolism;00010 Glycolysis / Gluconeogenesis [PATH:ko00010];glk; glucokinase [EC:2.7.1.2]	212	35	17	11	1	83	3
K02446	Carbohydrate metabolism;00010 Glycolysis / Gluconeogenesis [PATH:ko00010];glpX; fructose-1,6-bisphosphatase II [EC:3.1.3.11]	217	0	14	17	2	0	5
K01810	Carbohydrate metabolism;00010 Glycolysis / Gluconeogenesis [PATH:ko00010];GPI, pgi; glucose-6-phosphate isomerase [EC:5.3.1.9]	338	28	17	16	3	126	6
K15634	Carbohydrate metabolism;00010 Glycolysis / Gluconeogenesis [PATH:ko00010];gpmB; probable phosphoglycerate mutase [EC:5.4.2.12]	264	22	19	13	6	35	9
K15633	Carbohydrate metabolism;00010 Glycolysis / Gluconeogenesis [PATH:ko00010];gpmI; 2,3-bisphosphoglycerate-independent phosphoglycerate mutase [EC:5.4.2.12]	0	0	20	0	5	28	4
K00016	Carbohydrate metabolism;00010 Glycolysis / Gluconeogenesis [PATH:ko00010];LDH, ldh; L-lactate dehydrogenase [EC:1.1.1.27]	0	0	3	0	1	0	0
K00161	Carbohydrate metabolism;00010 Glycolysis / Gluconeogenesis [PATH:ko00010];PDHA, pdhA; pyruvate dehydrogenase E1 component alpha subunit [EC:1.2.4.1]	0	18	3	10	4	55	0
K00162	Carbohydrate metabolism;00010 Glycolysis / Gluconeogenesis [PATH:ko00010];PDHB, pdhB; pyruvate dehydrogenase E1 component beta subunit [EC:1.2.4.1]	0	17	8	8	0	40	0
K00850	Carbohydrate metabolism;00010 Glycolysis / Gluconeogenesis [PATH:ko00010];pfkA, PFK; 6-phosphofructokinase 1 [EC:2.7.1.11]	358	0	13	29	4	0	4
K16370	Carbohydrate metabolism;00010 Glycolysis / Gluconeogenesis [PATH:ko00010];pfkB; 6-phosphofructokinase 2 [EC:2.7.1.11]	0	3	15	0	1	0	0
K01834	Carbohydrate metabolism;00010 Glycolysis / Gluconeogenesis [PATH:ko00010];PGAM, gpmA; 2,3-bisphosphoglycerate-dependent phosphoglycerate mutase [EC:5.4.2.11]	133	22	13	18	0	77	3
K06859	Carbohydrate metabolism;00010 Glycolysis / Gluconeogenesis [PATH:ko00010];pgi1; glucose-6-phosphate isomerase, archaeal [EC:5.3.1.9]	1	1	2	0	0	0	0
K00927	Carbohydrate metabolism;00010 Glycolysis / Gluconeogenesis [PATH:ko00010];PGK, pgk; phosphoglycerate kinase [EC:2.7.2.3]	242	13	12	12	7	84	3
K01835	Carbohydrate metabolism;00010 Glycolysis / Gluconeogenesis [PATH:ko00010];pgm; phosphoglucomutase [EC:5.4.2.2]	303	0	25	37	8	111	6
K00873	Carbohydrate metabolism;00010 Glycolysis / Gluconeogenesis [PATH:ko00010];PK, pyk; pyruvate kinase [EC:2.7.1.40]	466	32	39	27	2	152	10
K15778	Carbohydrate metabolism;00010 Glycolysis / Gluconeogenesis [PATH:ko00010];pmm-pgm; phosphomannomutase / phosphoglucomutase [EC:5.4.2.8 5.4.2.2]	0	30	0	0	0	224	0
K03737	Carbohydrate metabolism;00010 Glycolysis / Gluconeogenesis [PATH:ko00010];por, nifJ; pyruvate-ferredoxin/flavodoxin oxidoreductase [EC:1.2.7.1 1.2.7.-]	10	0	31	1	5	0	8
K00886	Carbohydrate metabolism;00010 Glycolysis / Gluconeogenesis [PATH:ko00010];ppgK; polyphosphate glucokinase [EC:2.7.1.63]	79	6	0	0	0	0	0
K02753	Carbohydrate metabolism;00010 Glycolysis / Gluconeogenesis [PATH:ko00010];PTS-Asc-EIIC, ascF; PTS system, beta-glucoside (arbutin/salicin/cellobiose)-specific IIC component	249	0	29	1	1	0	13
K02777	Carbohydrate metabolism;00010 Glycolysis / Gluconeogenesis [PATH:ko00010];PTS-Glc-EIIA, crr; PTS system, sugar-specific IIA component [EC:2.7.1.-]	108	0	8	11	3	0	3
K02778	Carbohydrate metabolism;00010 Glycolysis / Gluconeogenesis [PATH:ko00010];PTS-Glc-EIIB, ptsG; PTS system, glucose-specific IIB component [EC:2.7.1.199]	36	0	1	1	3	0	0
K02779	Carbohydrate metabolism;00010 Glycolysis / Gluconeogenesis [PATH:ko00010];PTS-Glc-EIIC, ptsG; PTS system, glucose-specific IIC component	220	1	16	8	2	0	8
K02791	Carbohydrate metabolism;00010 Glycolysis / Gluconeogenesis [PATH:ko00010];PTS-MalGlc-EIIC, malX; PTS system, maltose/glucose-specific IIC component	393	0	54	14	11	0	14
K13810	Carbohydrate metabolism;00010 Glycolysis / Gluconeogenesis [PATH:ko00010];tal-pgi; transaldolase / glucose-6-phosphate isomerase [EC:2.2.1.2 5.3.1.9]	0	0	0	0	0	121	0
K01803	Carbohydrate metabolism;00010 Glycolysis / Gluconeogenesis [PATH:ko00010];TPI, tpiA; triosephosphate isomerase (TIM) [EC:5.3.1.1]	198	18	11	15	7	47	3
K13954	Carbohydrate metabolism;00010 Glycolysis / Gluconeogenesis [PATH:ko00010];yiaY; alcohol dehydrogenase [EC:1.1.1.1]	0	1	2	0	0	12	1
K18118	Carbohydrate metabolism;00020 Citrate cycle (TCA cycle) [PATH:ko00020];aarC, cat1; succinyl-CoA:acetate CoA-transferase [EC:2.8.3.18]	0	21	0	0	0	106	0
K00163	Carbohydrate metabolism;00020 Citrate cycle (TCA cycle) [PATH:ko00020];aceE; pyruvate dehydrogenase E1 component [EC:1.2.4.1]	426	97	28	22	7	193	13
K01682	Carbohydrate metabolism;00020 Citrate cycle (TCA cycle) [PATH:ko00020];acnB; aconitate hydratase 2 / 2-methylisocitrate dehydratase [EC:4.2.1.3 4.2.1.99]	405	31	53	22	0	141	5
K01681	Carbohydrate metabolism;00020 Citrate cycle (TCA cycle) [PATH:ko00020];ACO, acnA; aconitate hydratase [EC:4.2.1.3]	540	111	44	10	6	202	6
K01647	Carbohydrate metabolism;00020 Citrate cycle (TCA cycle) [PATH:ko00020];CS, gltA; citrate synthase [EC:2.3.3.1]	229	64	13	18	4	83	6
K00627	Carbohydrate metabolism;00020 Citrate cycle (TCA cycle) [PATH:ko00020];DLAT, aceF, pdhC; pyruvate dehydrogenase E2 component (dihydrolipoamide acetyltransferase) [EC:2.3.1.12]	339	49	22	14	11	197	5
K00382	Carbohydrate metabolism;00020 Citrate cycle (TCA cycle) [PATH:ko00020];DLD, lpd, pdhD; dihydrolipoamide dehydrogenase [EC:1.8.1.4]	228	108	22	11	10	316	12
K00658	Carbohydrate metabolism;00020 Citrate cycle (TCA cycle) [PATH:ko00020];DLST, sucB; 2-oxoglutarate dehydrogenase E2 component (dihydrolipoamide succinyltransferase) [EC:2.3.1.61]	187	21	9	26	4	82	4
K01596	Carbohydrate metabolism;00020 Citrate cycle (TCA cycle) [PATH:ko00020];E4.1.1.32, pckA, PCK; phosphoenolpyruvate carboxykinase (GTP) [EC:4.1.1.32]	0	37	0	0	0	0	0
K01610	Carbohydrate metabolism;00020 Citrate cycle (TCA cycle) [PATH:ko00020];E4.1.1.49, pckA; phosphoenolpyruvate carboxykinase (ATP) [EC:4.1.1.49]	374	0	41	28	15	97	7
K01676	Carbohydrate metabolism;00020 Citrate cycle (TCA cycle) [PATH:ko00020];E4.2.1.2A, fumA, fumB; fumarate hydratase, class I [EC:4.2.1.2]	275	34	55	13	2	125	3
K01677	Carbohydrate metabolism;00020 Citrate cycle (TCA cycle) [PATH:ko00020];E4.2.1.2AA, fumA; fumarate hydratase subunit alpha [EC:4.2.1.2]	0	1	0	0	0	5	0
K01678	Carbohydrate metabolism;00020 Citrate cycle (TCA cycle) [PATH:ko00020];E4.2.1.2AB, fumB; fumarate hydratase subunit beta [EC:4.2.1.2]	0	0	0	0	0	4	0
K01679	Carbohydrate metabolism;00020 Citrate cycle (TCA cycle) [PATH:ko00020];E4.2.1.2B, fumC; fumarate hydratase, class II [EC:4.2.1.2]	276	25	19	11	0	122	5
K00244	Carbohydrate metabolism;00020 Citrate cycle (TCA cycle) [PATH:ko00020];frdA; fumarate reductase flavoprotein subunit [EC:1.3.5.4]	464	4	31	37	15	0	4
K00245	Carbohydrate metabolism;00020 Citrate cycle (TCA cycle) [PATH:ko00020];frdB; fumarate reductase iron-sulfur subunit [EC:1.3.5.4]	7	1	15	14	5	0	3
K00246	Carbohydrate metabolism;00020 Citrate cycle (TCA cycle) [PATH:ko00020];frdC; fumarate reductase subunit C	0	1	12	11	2	0	3
K00247	Carbohydrate metabolism;00020 Citrate cycle (TCA cycle) [PATH:ko00020];frdD; fumarate reductase subunit D	0	0	8	3	4	0	3
K00031	Carbohydrate metabolism;00020 Citrate cycle (TCA cycle) [PATH:ko00020];IDH1, IDH2, icd; isocitrate dehydrogenase [EC:1.1.1.42]	166	35	14	15	7	138	8
K00024	Carbohydrate metabolism;00020 Citrate cycle (TCA cycle) [PATH:ko00020];mdh; malate dehydrogenase [EC:1.1.1.37]	206	23	13	13	5	0	5
K00116	Carbohydrate metabolism;00020 Citrate cycle (TCA cycle) [PATH:ko00020];mqo; malate dehydrogenase (quinone) [EC:1.1.5.4]	576	14	26	47	5	263	6
K00164	Carbohydrate metabolism;00020 Citrate cycle (TCA cycle) [PATH:ko00020];OGDH, sucA; 2-oxoglutarate dehydrogenase E1 component [EC:1.2.4.2]	391	50	38	28	3	153	8
K01958	Carbohydrate metabolism;00020 Citrate cycle (TCA cycle) [PATH:ko00020];PC, pyc; pyruvate carboxylase [EC:6.4.1.1]	0	42	0	0	0	0	0
K00161	Carbohydrate metabolism;00020 Citrate cycle (TCA cycle) [PATH:ko00020];PDHA, pdhA; pyruvate dehydrogenase E1 component alpha subunit [EC:1.2.4.1]	0	18	3	10	4	55	0
K00162	Carbohydrate metabolism;00020 Citrate cycle (TCA cycle) [PATH:ko00020];PDHB, pdhB; pyruvate dehydrogenase E1 component beta subunit [EC:1.2.4.1]	0	17	8	8	0	40	0
K03737	Carbohydrate metabolism;00020 Citrate cycle (TCA cycle) [PATH:ko00020];por, nifJ; pyruvate-ferredoxin/flavodoxin oxidoreductase [EC:1.2.7.1 1.2.7.-]	10	0	31	1	5	0	8
K01959	Carbohydrate metabolism;00020 Citrate cycle (TCA cycle) [PATH:ko00020];pycA; pyruvate carboxylase subunit A [EC:6.4.1.1]	0	0	0	0	0	101	0
K01960	Carbohydrate metabolism;00020 Citrate cycle (TCA cycle) [PATH:ko00020];pycB; pyruvate carboxylase subunit B [EC:6.4.1.1]	0	0	0	0	0	115	0
K00239	Carbohydrate metabolism;00020 Citrate cycle (TCA cycle) [PATH:ko00020];sdhA, frdA; succinate dehydrogenase / fumarate reductase, flavoprotein subunit [EC:1.3.5.1 1.3.5.4]	278	42	13	26	1	121	4
K00240	Carbohydrate metabolism;00020 Citrate cycle (TCA cycle) [PATH:ko00020];sdhB, frdB; succinate dehydrogenase / fumarate reductase, iron-sulfur subunit [EC:1.3.5.1 1.3.5.4]	138	19	9	17	2	54	4
K00241	Carbohydrate metabolism;00020 Citrate cycle (TCA cycle) [PATH:ko00020];sdhC, frdC; succinate dehydrogenase / fumarate reductase, cytochrome b subunit	75	6	8	8	3	26	4
K00242	Carbohydrate metabolism;00020 Citrate cycle (TCA cycle) [PATH:ko00020];sdhD, frdD; succinate dehydrogenase / fumarate reductase, membrane anchor subunit	87	10	10	4	1	25	4
K01903	Carbohydrate metabolism;00020 Citrate cycle (TCA cycle) [PATH:ko00020];sucC; succinyl-CoA synthetase beta subunit [EC:6.2.1.5]	155	33	12	17	3	58	4
K01902	Carbohydrate metabolism;00020 Citrate cycle (TCA cycle) [PATH:ko00020];sucD; succinyl-CoA synthetase alpha subunit [EC:6.2.1.5]	163	29	10	10	2	56	3
K01623	Carbohydrate metabolism;00030 Pentose phosphate pathway [PATH:ko00030];ALDO; fructose-bisphosphate aldolase, class I [EC:4.1.2.13]	0	11	0	0	0	0	0
K01839	Carbohydrate metabolism;00030 Pentose phosphate pathway [PATH:ko00030];deoB; phosphopentomutase [EC:5.4.2.7]	258	7	13	10	3	0	5
K01619	Carbohydrate metabolism;00030 Pentose phosphate pathway [PATH:ko00030];deoC, DERA; deoxyribose-phosphate aldolase [EC:4.1.2.4]	189	6	17	15	4	70	9
K17468	Carbohydrate metabolism;00030 Pentose phosphate pathway [PATH:ko00030];dgaE; D-glucosaminate-6-phosphate ammonia-lyase [EC:4.3.1.29]	0	0	2	0	0	0	0
K00090	Carbohydrate metabolism;00030 Pentose phosphate pathway [PATH:ko00030];E1.1.1.215; gluconate 2-dehydrogenase [EC:1.1.1.215]	197	21	15	12	6	78	3
K00032	Carbohydrate metabolism;00030 Pentose phosphate pathway [PATH:ko00030];E1.1.1.43; phosphogluconate 2-dehydrogenase [EC:1.1.1.43]	0	0	0	0	0	78	0
K06151	Carbohydrate metabolism;00030 Pentose phosphate pathway [PATH:ko00030];E1.1.99.3A; gluconate 2-dehydrogenase alpha chain [EC:1.1.99.3]	757	47	14	53	0	181	19
K06152	Carbohydrate metabolism;00030 Pentose phosphate pathway [PATH:ko00030];E1.1.99.3G; gluconate 2-dehydrogenase gamma chain [EC:1.1.99.3]	439	32	7	39	0	118	9
K00615	Carbohydrate metabolism;00030 Pentose phosphate pathway [PATH:ko00030];E2.2.1.1, tktA, tktB; transketolase [EC:2.2.1.1]	1250	83	93	44	13	512	32
K00616	Carbohydrate metabolism;00030 Pentose phosphate pathway [PATH:ko00030];E2.2.1.2, talA, talB; transaldolase [EC:2.2.1.2]	364	21	31	24	9	92	8
K00851	Carbohydrate metabolism;00030 Pentose phosphate pathway [PATH:ko00030];E2.7.1.12, gntK, idnK; gluconokinase [EC:2.7.1.12]	133	12	10	13	2	92	6
K01053	Carbohydrate metabolism;00030 Pentose phosphate pathway [PATH:ko00030];E3.1.1.17, gnl, RGN; gluconolactonase [EC:3.1.1.17]	289	24	0	2	5	174	5
K01625	Carbohydrate metabolism;00030 Pentose phosphate pathway [PATH:ko00030];eda; 2-dehydro-3-deoxyphosphogluconate aldolase / (4S)-4-hydroxy-2-oxoglutarate aldolase [EC:4.1.2.14 4.1.3.42]	117	17	11	14	1	51	7
K01690	Carbohydrate metabolism;00030 Pentose phosphate pathway [PATH:ko00030];edd; phosphogluconate dehydratase [EC:4.2.1.12]	0	40	24	0	2	105	4
K01624	Carbohydrate metabolism;00030 Pentose phosphate pathway [PATH:ko00030];FBA, fbaA; fructose-bisphosphate aldolase, class II [EC:4.1.2.13]	801	24	50	19	17	84	3
K11645	Carbohydrate metabolism;00030 Pentose phosphate pathway [PATH:ko00030];fbaB; fructose-bisphosphate aldolase, class I [EC:4.1.2.13]	15	1	11	10	6	0	3
K03841	Carbohydrate metabolism;00030 Pentose phosphate pathway [PATH:ko00030];FBP, fbp; fructose-1,6-bisphosphatase I [EC:3.1.3.11]	203	28	18	31	7	78	4
K00036	Carbohydrate metabolism;00030 Pentose phosphate pathway [PATH:ko00030];G6PD, zwf; glucose-6-phosphate 1-dehydrogenase [EC:1.1.1.49 1.1.1.363]	401	86	15	11	3	211	5
K00131	Carbohydrate metabolism;00030 Pentose phosphate pathway [PATH:ko00030];gapN; glyceraldehyde-3-phosphate dehydrogenase (NADP+) [EC:1.2.1.9]	0	0	0	0	0	15	0
K00117	Carbohydrate metabolism;00030 Pentose phosphate pathway [PATH:ko00030];gcd; quinoprotein glucose dehydrogenase [EC:1.1.5.2]	772	12	51	85	4	157	8
K00034	Carbohydrate metabolism;00030 Pentose phosphate pathway [PATH:ko00030];gdh; glucose 1-dehydrogenase [EC:1.1.1.47]	68	5	0	0	0	60	1
K02446	Carbohydrate metabolism;00030 Pentose phosphate pathway [PATH:ko00030];glpX; fructose-1,6-bisphosphatase II [EC:3.1.3.11]	217	0	14	17	2	0	5
K01810	Carbohydrate metabolism;00030 Pentose phosphate pathway [PATH:ko00030];GPI, pgi; glucose-6-phosphate isomerase [EC:5.3.1.9]	338	28	17	16	3	126	6
K13831	Carbohydrate metabolism;00030 Pentose phosphate pathway [PATH:ko00030];hps-phi; 3-hexulose-6-phosphate synthase / 6-phospho-3-hexuloisomerase [EC:4.1.2.43 5.3.1.27]	0	1	0	0	0	0	0
K08093	Carbohydrate metabolism;00030 Pentose phosphate pathway [PATH:ko00030];hxlA; 3-hexulose-6-phosphate synthase [EC:4.1.2.43]	0	0	1	0	2	0	0
K08094	Carbohydrate metabolism;00030 Pentose phosphate pathway [PATH:ko00030];hxlB; 6-phospho-3-hexuloisomerase [EC:5.3.1.27]	3	0	1	0	0	0	0
K00874	Carbohydrate metabolism;00030 Pentose phosphate pathway [PATH:ko00030];kdgK; 2-dehydro-3-deoxygluconokinase [EC:2.7.1.45]	449	43	31	15	12	43	8
K11441	Carbohydrate metabolism;00030 Pentose phosphate pathway [PATH:ko00030];kguK; dehydrogluconokinase [EC:2.7.1.13]	0	0	0	0	0	73	0
K00850	Carbohydrate metabolism;00030 Pentose phosphate pathway [PATH:ko00030];pfkA, PFK; 6-phosphofructokinase 1 [EC:2.7.1.11]	358	0	13	29	4	0	4
K16370	Carbohydrate metabolism;00030 Pentose phosphate pathway [PATH:ko00030];pfkB; 6-phosphofructokinase 2 [EC:2.7.1.11]	0	3	15	0	1	0	0
K00033	Carbohydrate metabolism;00030 Pentose phosphate pathway [PATH:ko00030];PGD, gnd, gntZ; 6-phosphogluconate dehydrogenase [EC:1.1.1.44 1.1.1.343]	331	18	17	19	0	73	7
K06859	Carbohydrate metabolism;00030 Pentose phosphate pathway [PATH:ko00030];pgi1; glucose-6-phosphate isomerase, archaeal [EC:5.3.1.9]	1	1	2	0	0	0	0
K07404	Carbohydrate metabolism;00030 Pentose phosphate pathway [PATH:ko00030];pgl; 6-phosphogluconolactonase [EC:3.1.1.31]	360	57	19	30	1	1	8
K01057	Carbohydrate metabolism;00030 Pentose phosphate pathway [PATH:ko00030];PGLS, pgl, devB; 6-phosphogluconolactonase [EC:3.1.1.31]	0	13	0	0	0	61	0
K01835	Carbohydrate metabolism;00030 Pentose phosphate pathway [PATH:ko00030];pgm; phosphoglucomutase [EC:5.4.2.2]	303	0	25	37	8	111	6
K05774	Carbohydrate metabolism;00030 Pentose phosphate pathway [PATH:ko00030];phnN; ribose 1,5-bisphosphokinase [EC:2.7.4.23]	151	2	11	0	0	2	3
K15778	Carbohydrate metabolism;00030 Pentose phosphate pathway [PATH:ko00030];pmm-pgm; phosphomannomutase / phosphoglucomutase [EC:5.4.2.8 5.4.2.2]	0	30	0	0	0	224	0
K00948	Carbohydrate metabolism;00030 Pentose phosphate pathway [PATH:ko00030];PRPS, prsA; ribose-phosphate pyrophosphokinase [EC:2.7.6.1]	116	26	11	24	3	75	4
K17464	Carbohydrate metabolism;00030 Pentose phosphate pathway [PATH:ko00030];PTS-Dga-EIIA, dgaA; PTS system, D-glucosaminate-specific IIA component [EC:2.7.1.203]	0	0	2	0	0	0	0
K17465	Carbohydrate metabolism;00030 Pentose phosphate pathway [PATH:ko00030];PTS-Dga-EIIB, dgaB; PTS system, D-glucosaminate-specific IIB component [EC:2.7.1.203]	0	0	1	0	0	0	0
K17466	Carbohydrate metabolism;00030 Pentose phosphate pathway [PATH:ko00030];PTS-Dga-EIIC, dgaC; PTS system, D-glucosaminate-specific IIC component	0	0	2	0	0	0	0
K17467	Carbohydrate metabolism;00030 Pentose phosphate pathway [PATH:ko00030];PTS-Dga-EIID, dgaD; PTS system, D-glucosaminate-specific IID component	0	0	1	0	0	0	0
K00852	Carbohydrate metabolism;00030 Pentose phosphate pathway [PATH:ko00030];rbsK, RBKS; ribokinase [EC:2.7.1.15]	556	40	18	23	5	107	4
K01783	Carbohydrate metabolism;00030 Pentose phosphate pathway [PATH:ko00030];rpe, RPE; ribulose-phosphate 3-epimerase [EC:5.1.3.1]	172	23	14	18	4	58	3
K01807	Carbohydrate metabolism;00030 Pentose phosphate pathway [PATH:ko00030];rpiA; ribose 5-phosphate isomerase A [EC:5.3.1.6]	147	15	12	5	4	71	3
K01808	Carbohydrate metabolism;00030 Pentose phosphate pathway [PATH:ko00030];rpiB; ribose 5-phosphate isomerase B [EC:5.3.1.6]	23	1	2	1	1	6	4
K13810	Carbohydrate metabolism;00030 Pentose phosphate pathway [PATH:ko00030];tal-pgi; transaldolase / glucose-6-phosphate isomerase [EC:2.2.1.2 5.3.1.9]	0	0	0	0	0	121	0
K01621	Carbohydrate metabolism;00030 Pentose phosphate pathway [PATH:ko00030];xfp, xpk; xylulose-5-phosphate/fructose-6-phosphate phosphoketolase [EC:4.1.2.9 4.1.2.22]	495	5	3	2	7	19	0
K00002	Carbohydrate metabolism;00040 Pentose and glucuronate interconversions [PATH:ko00040];AKR1A1, adh; alcohol dehydrogenase (NADP+) [EC:1.1.1.2]	0	0	1	0	0	0	0
K13877	Carbohydrate metabolism;00040 Pentose and glucuronate interconversions [PATH:ko00040];aldH; 2,5-dioxopentanoate dehydrogenase [EC:1.2.1.26]	0	1	0	0	0	0	0
K01804	Carbohydrate metabolism;00040 Pentose and glucuronate interconversions [PATH:ko00040];araA; L-arabinose isomerase [EC:5.3.1.4]	305	0	18	15	11	0	2
K00853	Carbohydrate metabolism;00040 Pentose and glucuronate interconversions [PATH:ko00040];araB; L-ribulokinase [EC:2.7.1.16]	325	0	20	17	7	0	1
K01786	Carbohydrate metabolism;00040 Pentose and glucuronate interconversions [PATH:ko00040];araD; L-ribulose-5-phosphate 4-epimerase [EC:5.1.3.4]	158	0	14	5	3	0	5
K00007	Carbohydrate metabolism;00040 Pentose and glucuronate interconversions [PATH:ko00040];dalD; D-arabinitol 4-dehydrogenase [EC:1.1.1.11]	231	18	7	16	1	0	1
K08092	Carbohydrate metabolism;00040 Pentose and glucuronate interconversions [PATH:ko00040];dlgD; 3-dehydro-L-gulonate 2-dehydrogenase [EC:1.1.1.130]	96	0	6	0	2	0	1
K05351	Carbohydrate metabolism;00040 Pentose and glucuronate interconversions [PATH:ko00040];E1.1.1.9; D-xylulose reductase [EC:1.1.1.9]	26	9	0	0	0	0	5
K00875	Carbohydrate metabolism;00040 Pentose and glucuronate interconversions [PATH:ko00040];E2.7.1.47; D-ribulokinase [EC:2.7.1.47]	0	1	0	0	0	0	0
K01051	Carbohydrate metabolism;00040 Pentose and glucuronate interconversions [PATH:ko00040];E3.1.1.11; pectinesterase [EC:3.1.1.11]	0	0	15	0	4	0	0
K01184	Carbohydrate metabolism;00040 Pentose and glucuronate interconversions [PATH:ko00040];E3.2.1.15; polygalacturonase [EC:3.2.1.15]	135	3	0	0	0	18	0
K00065	Carbohydrate metabolism;00040 Pentose and glucuronate interconversions [PATH:ko00040];kduD; 2-deoxy-D-gluconate 3-dehydrogenase [EC:1.1.1.125]	160	6	22	9	8	4	0
K01815	Carbohydrate metabolism;00040 Pentose and glucuronate interconversions [PATH:ko00040];kduI; 4-deoxy-L-threo-5-hexosulose-uronate ketol-isomerase [EC:5.3.1.17]	188	1	13	0	3	0	1
K00880	Carbohydrate metabolism;00040 Pentose and glucuronate interconversions [PATH:ko00040];lyxK; L-xylulokinase [EC:2.7.1.53]	201	0	15	0	0	0	8
K01730	Carbohydrate metabolism;00040 Pentose and glucuronate interconversions [PATH:ko00040];ogl; oligogalacturonide lyase [EC:4.2.2.6]	0	0	7	0	2	0	1
K01728	Carbohydrate metabolism;00040 Pentose and glucuronate interconversions [PATH:ko00040];pel; pectate lyase [EC:4.2.2.2]	0	0	0	0	1	0	0
K01731	Carbohydrate metabolism;00040 Pentose and glucuronate interconversions [PATH:ko00040];pelW; pectate disaccharide-lyase [EC:4.2.2.9]	0	0	4	0	3	0	0
K00039	Carbohydrate metabolism;00040 Pentose and glucuronate interconversions [PATH:ko00040];rbtD; ribitol 2-dehydrogenase [EC:1.1.1.56]	5	3	0	0	1	3	0
K00848	Carbohydrate metabolism;00040 Pentose and glucuronate interconversions [PATH:ko00040];rhaB; rhamnulokinase [EC:2.7.1.5]	131	0	12	11	5	0	1
K01629	Carbohydrate metabolism;00040 Pentose and glucuronate interconversions [PATH:ko00040];rhaD; rhamnulose-1-phosphate aldolase [EC:4.1.2.19]	103	0	19	13	4	0	0
K01783	Carbohydrate metabolism;00040 Pentose and glucuronate interconversions [PATH:ko00040];rpe, RPE; ribulose-phosphate 3-epimerase [EC:5.1.3.1]	172	23	14	18	4	58	3
K08323	Carbohydrate metabolism;00040 Pentose and glucuronate interconversions [PATH:ko00040];rspA, manD; mannonate dehydratase [EC:4.2.1.8]	230	6	17	10	4	27	5
K08322	Carbohydrate metabolism;00040 Pentose and glucuronate interconversions [PATH:ko00040];rspB; L-gulonate 5-dehydrogenase [EC:1.1.1.380]	96	4	13	11	2	12	3
K03080	Carbohydrate metabolism;00040 Pentose and glucuronate interconversions [PATH:ko00040];sgbE; L-ribulose-5-phosphate 4-epimerase [EC:5.1.3.4]	102	0	8	0	1	0	1
K03081	Carbohydrate metabolism;00040 Pentose and glucuronate interconversions [PATH:ko00040];sgbH; 3-dehydro-L-gulonate-6-phosphate decarboxylase [EC:4.1.1.85]	53	0	6	0	0	0	1
K03082	Carbohydrate metabolism;00040 Pentose and glucuronate interconversions [PATH:ko00040];sgbU; hexulose-6-phosphate isomerase [EC:5.-.-.-]	85	0	10	1	2	7	6
K00008	Carbohydrate metabolism;00040 Pentose and glucuronate interconversions [PATH:ko00040];SORD, gutB; L-iditol 2-dehydrogenase [EC:1.1.1.14]	11	15	2	11	0	27	6
K00012	Carbohydrate metabolism;00040 Pentose and glucuronate interconversions [PATH:ko00040];UGDH, ugd; UDPglucose 6-dehydrogenase [EC:1.1.1.22]	183	51	17	17	1	119	16
K00963	Carbohydrate metabolism;00040 Pentose and glucuronate interconversions [PATH:ko00040];UGP2, galU, galF; UTP--glucose-1-phosphate uridylyltransferase [EC:2.7.7.9]	353	39	25	14	2	58	15
K01195	Carbohydrate metabolism;00040 Pentose and glucuronate interconversions [PATH:ko00040];uidA, GUSB; beta-glucuronidase [EC:3.2.1.31]	3	0	0	0	0	0	0
K01685	Carbohydrate metabolism;00040 Pentose and glucuronate interconversions [PATH:ko00040];uxaA; altronate hydrolase [EC:4.2.1.7]	295	38	27	3	3	38	7
K00041	Carbohydrate metabolism;00040 Pentose and glucuronate interconversions [PATH:ko00040];uxaB; tagaturonate reductase [EC:1.1.1.58]	315	10	15	3	1	14	0
K01812	Carbohydrate metabolism;00040 Pentose and glucuronate interconversions [PATH:ko00040];uxaC; glucuronate isomerase [EC:5.3.1.12]	299	0	18	3	4	0	5
K01686	Carbohydrate metabolism;00040 Pentose and glucuronate interconversions [PATH:ko00040];uxuA; mannonate dehydratase [EC:4.2.1.8]	301	5	30	1	7	14	5
K00040	Carbohydrate metabolism;00040 Pentose and glucuronate interconversions [PATH:ko00040];uxuB; fructuronate reductase [EC:1.1.1.57]	425	4	25	8	6	21	10
K01805	Carbohydrate metabolism;00040 Pentose and glucuronate interconversions [PATH:ko00040];xylA; xylose isomerase [EC:5.3.1.5]	320	38	16	22	7	96	1
K00854	Carbohydrate metabolism;00040 Pentose and glucuronate interconversions [PATH:ko00040];xylB, XYLB; xylulokinase [EC:2.7.1.17]	619	90	23	56	10	214	14
K01623	Carbohydrate metabolism;00051 Fructose and mannose metabolism [PATH:ko00051];ALDO; fructose-bisphosphate aldolase, class I [EC:4.1.2.13]	0	11	0	0	0	0	0
K19291	Carbohydrate metabolism;00051 Fructose and mannose metabolism [PATH:ko00051];alg44; mannuronan synthase [EC:2.4.1.33]	0	0	0	0	0	14	0
K19290	Carbohydrate metabolism;00051 Fructose and mannose metabolism [PATH:ko00051];alg8; mannuronan synthase [EC:2.4.1.33]	0	0	0	0	0	23	0
K16011	Carbohydrate metabolism;00051 Fructose and mannose metabolism [PATH:ko00051];algA, xanB, rfbA, wbpW, pslB; mannose-1-phosphate guanylyltransferase / mannose-6-phosphate isomerase [EC:2.7.7.13 5.3.1.8]	0	66	0	0	0	123	0
K00066	Carbohydrate metabolism;00051 Fructose and mannose metabolism [PATH:ko00051];algD; GDP-mannose 6-dehydrogenase [EC:1.1.1.132]	0	0	0	0	0	16	0
K01795	Carbohydrate metabolism;00051 Fructose and mannose metabolism [PATH:ko00051];algG; mannuronan 5-epimerase [EC:5.1.3.37]	0	0	0	0	0	21	0
K01729	Carbohydrate metabolism;00051 Fructose and mannose metabolism [PATH:ko00051];algL; poly(beta-D-mannuronate) lyase [EC:4.2.2.3]	0	1	6	0	0	18	0
K17195	Carbohydrate metabolism;00051 Fructose and mannose metabolism [PATH:ko00051];alsE; D-allulose-6-phosphate 3-epimerase [EC:5.1.3.-]	139	0	2	0	2	0	3
K00881	Carbohydrate metabolism;00051 Fructose and mannose metabolism [PATH:ko00051];alsK; allose kinase [EC:2.7.1.55]	159	0	2	0	0	0	4
K00863	Carbohydrate metabolism;00051 Fructose and mannose metabolism [PATH:ko00051];DAK, TKFC; triose/dihydroxyacetone kinase / FAD-AMP lyase (cyclizing) [EC:2.7.1.28 2.7.1.29 4.6.1.15]	217	31	29	22	5	102	0
K00007	Carbohydrate metabolism;00051 Fructose and mannose metabolism [PATH:ko00051];dalD; D-arabinitol 4-dehydrogenase [EC:1.1.1.11]	231	18	7	16	1	0	1
K00064	Carbohydrate metabolism;00051 Fructose and mannose metabolism [PATH:ko00051];E1.1.1.122; D-threo-aldose 1-dehydrogenase [EC:1.1.1.122]	0	26	1	0	1	114	0
K00045	Carbohydrate metabolism;00051 Fructose and mannose metabolism [PATH:ko00051];E1.1.1.67, mtlK; mannitol 2-dehydrogenase [EC:1.1.1.67]	0	0	0	0	0	110	0
K08261	Carbohydrate metabolism;00051 Fructose and mannose metabolism [PATH:ko00051];E1.1.99.21; D-sorbitol dehydrogenase (acceptor) [EC:1.1.99.21]	0	19	0	15	0	37	3
K00847	Carbohydrate metabolism;00051 Fructose and mannose metabolism [PATH:ko00051];E2.7.1.4, scrK; fructokinase [EC:2.7.1.4]	396	55	36	4	6	49	11
K07026	Carbohydrate metabolism;00051 Fructose and mannose metabolism [PATH:ko00051];E3.1.3.70; mannosyl-3-phosphoglycerate phosphatase [EC:3.1.3.70]	194	0	16	13	0	0	1
K01624	Carbohydrate metabolism;00051 Fructose and mannose metabolism [PATH:ko00051];FBA, fbaA; fructose-bisphosphate aldolase, class II [EC:4.1.2.13]	801	24	50	19	17	84	3
K11645	Carbohydrate metabolism;00051 Fructose and mannose metabolism [PATH:ko00051];fbaB; fructose-bisphosphate aldolase, class I [EC:4.1.2.13]	15	1	11	10	6	0	3
K03841	Carbohydrate metabolism;00051 Fructose and mannose metabolism [PATH:ko00051];FBP, fbp; fructose-1,6-bisphosphatase I [EC:3.1.3.11]	203	28	18	31	7	78	4
K00882	Carbohydrate metabolism;00051 Fructose and mannose metabolism [PATH:ko00051];fruK; 1-phosphofructokinase [EC:2.7.1.56]	140	3	28	15	5	70	5
K01628	Carbohydrate metabolism;00051 Fructose and mannose metabolism [PATH:ko00051];fucA; L-fuculose-phosphate aldolase [EC:4.1.2.17]	0	11	0	1	0	42	0
K18334	Carbohydrate metabolism;00051 Fructose and mannose metabolism [PATH:ko00051];fucD; L-fuconate dehydratase [EC:4.2.1.68]	20	16	18	0	0	33	5
K01818	Carbohydrate metabolism;00051 Fructose and mannose metabolism [PATH:ko00051];fucI; L-fucose/D-arabinose isomerase [EC:5.3.1.25 5.3.1.3]	0	0	1	0	0	0	0
K02446	Carbohydrate metabolism;00051 Fructose and mannose metabolism [PATH:ko00051];glpX; fructose-1,6-bisphosphatase II [EC:3.1.3.11]	217	0	14	17	2	0	5
K01711	Carbohydrate metabolism;00051 Fructose and mannose metabolism [PATH:ko00051];gmd, GMDS; GDPmannose 4,6-dehydratase [EC:4.2.1.47]	24	43	10	3	1	72	0
K00966	Carbohydrate metabolism;00051 Fructose and mannose metabolism [PATH:ko00051];GMPP; mannose-1-phosphate guanylyltransferase [EC:2.7.7.13]	0	0	0	0	0	1	0
K07046	Carbohydrate metabolism;00051 Fructose and mannose metabolism [PATH:ko00051];K07046; L-fuconolactonase [EC:3.1.1.-]	19	26	2	0	0	36	4
K18333	Carbohydrate metabolism;00051 Fructose and mannose metabolism [PATH:ko00051];K18333; L-fucose dehydrogenase	34	18	3	0	0	29	4
K18335	Carbohydrate metabolism;00051 Fructose and mannose metabolism [PATH:ko00051];K18335; 2-keto-3-deoxy-L-fuconate dehydrogenase [EC:1.1.1.-]	27	16	8	0	0	22	3
K18336	Carbohydrate metabolism;00051 Fructose and mannose metabolism [PATH:ko00051];K18336; 2,4-diketo-3-deoxy-L-fuconate hydrolase [EC:3.7.1.-]	0	11	1	0	0	0	0
K18337	Carbohydrate metabolism;00051 Fructose and mannose metabolism [PATH:ko00051];LRA1; L-rhamnose 1-dehydrogenase [EC:1.1.1.378 1.1.1.377 1.1.1.173]	0	2	0	0	0	0	0
K12661	Carbohydrate metabolism;00051 Fructose and mannose metabolism [PATH:ko00051];LRA3, yfaW; L-rhamnonate dehydratase [EC:4.2.1.90]	21	4	1	0	0	30	0
K01809	Carbohydrate metabolism;00051 Fructose and mannose metabolism [PATH:ko00051];manA, MPI; mannose-6-phosphate isomerase [EC:5.3.1.8]	231	26	28	8	10	27	5
K01840	Carbohydrate metabolism;00051 Fructose and mannose metabolism [PATH:ko00051];manB; phosphomannomutase [EC:5.4.2.8]	33	0	19	3	14	0	6
K00971	Carbohydrate metabolism;00051 Fructose and mannose metabolism [PATH:ko00051];manC, cpsB; mannose-1-phosphate guanylyltransferase [EC:2.7.7.13]	40	12	18	2	7	25	8
K00009	Carbohydrate metabolism;00051 Fructose and mannose metabolism [PATH:ko00051];mtlD; mannitol-1-phosphate 5-dehydrogenase [EC:1.1.1.17]	256	0	15	17	5	0	4
K00850	Carbohydrate metabolism;00051 Fructose and mannose metabolism [PATH:ko00051];pfkA, PFK; 6-phosphofructokinase 1 [EC:2.7.1.11]	358	0	13	29	4	0	4
K16370	Carbohydrate metabolism;00051 Fructose and mannose metabolism [PATH:ko00051];pfkB; 6-phosphofructokinase 2 [EC:2.7.1.11]	0	3	15	0	1	0	0
K15778	Carbohydrate metabolism;00051 Fructose and mannose metabolism [PATH:ko00051];pmm-pgm; phosphomannomutase / phosphoglucomutase [EC:5.4.2.8 5.4.2.2]	0	30	0	0	0	224	0
K02768	Carbohydrate metabolism;00051 Fructose and mannose metabolism [PATH:ko00051];PTS-Fru-EIIA, fruB; PTS system, fructose-specific IIA component [EC:2.7.1.202]	134	0	6	0	2	0	0
K02769	Carbohydrate metabolism;00051 Fructose and mannose metabolism [PATH:ko00051];PTS-Fru-EIIB, fruA; PTS system, fructose-specific IIB component [EC:2.7.1.202]	52	0	0	1	4	0	0
K02770	Carbohydrate metabolism;00051 Fructose and mannose metabolism [PATH:ko00051];PTS-Fru-EIIC, fruA; PTS system, fructose-specific IIC component	573	4	35	47	6	117	4
K02781	Carbohydrate metabolism;00051 Fructose and mannose metabolism [PATH:ko00051];PTS-Gut-EIIA, srlB; PTS system, glucitol/sorbitol-specific IIA component [EC:2.7.1.198]	3	0	15	0	4	0	3
K02783	Carbohydrate metabolism;00051 Fructose and mannose metabolism [PATH:ko00051];PTS-Gut-EIIC, srlA; PTS system, glucitol/sorbitol-specific IIC component	5	1	24	0	13	0	8
K02793	Carbohydrate metabolism;00051 Fructose and mannose metabolism [PATH:ko00051];PTS-Man-EIIA, manX; PTS system, mannose-specific IIA component [EC:2.7.1.191]	0	0	1	0	0	0	0
K02794	Carbohydrate metabolism;00051 Fructose and mannose metabolism [PATH:ko00051];PTS-Man-EIIB, manX; PTS system, mannose-specific IIB component [EC:2.7.1.191]	164	0	20	2	0	0	7
K02795	Carbohydrate metabolism;00051 Fructose and mannose metabolism [PATH:ko00051];PTS-Man-EIIC, manY; PTS system, mannose-specific IIC component	136	0	22	13	4	0	4
K02796	Carbohydrate metabolism;00051 Fructose and mannose metabolism [PATH:ko00051];PTS-Man-EIID, manZ; PTS system, mannose-specific IID component	159	0	22	3	1	0	5
K02798	Carbohydrate metabolism;00051 Fructose and mannose metabolism [PATH:ko00051];PTS-Mtl-EIIA, mtlA, cmtB; PTS system, mannitol-specific IIA component [EC:2.7.1.197]	0	0	1	0	0	0	0
K02800	Carbohydrate metabolism;00051 Fructose and mannose metabolism [PATH:ko00051];PTS-Mtl-EIIC, mtlA, cmtA; PTS system, mannitol-specific IIC component	369	0	18	16	3	0	8
K02814	Carbohydrate metabolism;00051 Fructose and mannose metabolism [PATH:ko00051];PTS-Sor-EIIC, sorA; PTS system, sorbose-specific IIC component	0	0	0	0	1	0	0
K02815	Carbohydrate metabolism;00051 Fructose and mannose metabolism [PATH:ko00051];PTS-Sor-EIID, sorM; PTS system, sorbose-specific IID component	0	0	0	0	1	0	0
K01813	Carbohydrate metabolism;00051 Fructose and mannose metabolism [PATH:ko00051];rhaA; L-rhamnose isomerase [EC:5.3.1.14]	124	0	22	12	3	0	0
K00848	Carbohydrate metabolism;00051 Fructose and mannose metabolism [PATH:ko00051];rhaB; rhamnulokinase [EC:2.7.1.5]	131	0	12	11	5	0	1
K01629	Carbohydrate metabolism;00051 Fructose and mannose metabolism [PATH:ko00051];rhaD; rhamnulose-1-phosphate aldolase [EC:4.1.2.19]	103	0	19	13	4	0	0
K12660	Carbohydrate metabolism;00051 Fructose and mannose metabolism [PATH:ko00051];rhmA; 2-dehydro-3-deoxy-L-rhamnonate aldolase [EC:4.1.2.53]	20	0	1	0	2	0	0
K15856	Carbohydrate metabolism;00051 Fructose and mannose metabolism [PATH:ko00051];rmd; GDP-4-dehydro-6-deoxy-D-mannose reductase [EC:1.1.1.281]	0	0	0	0	0	27	0
K01808	Carbohydrate metabolism;00051 Fructose and mannose metabolism [PATH:ko00051];rpiB; ribose 5-phosphate isomerase B [EC:5.3.1.6]	23	1	2	1	1	6	4
K00008	Carbohydrate metabolism;00051 Fructose and mannose metabolism [PATH:ko00051];SORD, gutB; L-iditol 2-dehydrogenase [EC:1.1.1.14]	11	15	2	11	0	27	6
K00068	Carbohydrate metabolism;00051 Fructose and mannose metabolism [PATH:ko00051];srlD; sorbitol-6-phosphate 2-dehydrogenase [EC:1.1.1.140]	3	0	9	1	6	0	3
K01803	Carbohydrate metabolism;00051 Fructose and mannose metabolism [PATH:ko00051];TPI, tpiA; triosephosphate isomerase (TIM) [EC:5.3.1.1]	198	18	11	15	7	47	3
K02377	Carbohydrate metabolism;00051 Fructose and mannose metabolism [PATH:ko00051];TSTA3, fcl; GDP-L-fucose synthase [EC:1.1.1.271]	1	2	10	0	0	2	0
K01805	Carbohydrate metabolism;00051 Fructose and mannose metabolism [PATH:ko00051];xylA; xylose isomerase [EC:5.3.1.5]	320	38	16	22	7	96	1
K02079	Carbohydrate metabolism;00052 Galactose metabolism [PATH:ko00052];agaA; N-acetylgalactosamine-6-phosphate deacetylase [EC:3.5.1.25]	2	0	9	0	0	0	0
K12308	Carbohydrate metabolism;00052 Galactose metabolism [PATH:ko00052];bgaB, lacA; beta-galactosidase [EC:3.2.1.23]	94	42	21	0	11	0	0
K17716	Carbohydrate metabolism;00052 Galactose metabolism [PATH:ko00052];capD; UDP-glucose 4-epimerase [EC:5.1.3.2]	8	0	0	0	0	0	0
K01631	Carbohydrate metabolism;00052 Galactose metabolism [PATH:ko00052];dgoA; 2-dehydro-3-deoxyphosphogalactonate aldolase [EC:4.1.2.21]	41	26	15	4	1	74	3
K01684	Carbohydrate metabolism;00052 Galactose metabolism [PATH:ko00052];dgoD; galactonate dehydratase [EC:4.2.1.6]	54	25	7	4	11	126	0
K00883	Carbohydrate metabolism;00052 Galactose metabolism [PATH:ko00052];dgoK; 2-dehydro-3-deoxygalactonokinase [EC:2.7.1.58]	42	19	11	2	12	93	5
K00094	Carbohydrate metabolism;00052 Galactose metabolism [PATH:ko00052];E1.1.1.251, gatD; galactitol-1-phosphate 5-dehydrogenase [EC:1.1.1.251]	1	0	2	0	5	0	0
K07407	Carbohydrate metabolism;00052 Galactose metabolism [PATH:ko00052];E3.2.1.22B, galA, rafA; alpha-galactosidase [EC:3.2.1.22]	1	4	9	0	0	0	2
K12111	Carbohydrate metabolism;00052 Galactose metabolism [PATH:ko00052];ebgA; evolved beta-galactosidase subunit alpha [EC:3.2.1.23]	0	0	12	0	1	0	5
K12112	Carbohydrate metabolism;00052 Galactose metabolism [PATH:ko00052];ebgC; evolved beta-galactosidase subunit beta	0	0	5	0	2	0	3
K00035	Carbohydrate metabolism;00052 Galactose metabolism [PATH:ko00052];gal; D-galactose 1-dehydrogenase [EC:1.1.1.48]	0	1	0	0	0	54	0
K01784	Carbohydrate metabolism;00052 Galactose metabolism [PATH:ko00052];galE, GALE; UDP-glucose 4-epimerase [EC:5.1.3.2]	303	51	16	15	0	117	14
K00849	Carbohydrate metabolism;00052 Galactose metabolism [PATH:ko00052];galK; galactokinase [EC:2.7.1.6]	233	0	23	14	5	0	7
K01785	Carbohydrate metabolism;00052 Galactose metabolism [PATH:ko00052];galM, GALM; aldose 1-epimerase [EC:5.1.3.3]	320	46	13	10	1	106	3
K00965	Carbohydrate metabolism;00052 Galactose metabolism [PATH:ko00052];galT, GALT; UDPglucose--hexose-1-phosphate uridylyltransferase [EC:2.7.7.12]	256	0	16	8	8	0	13
K08302	Carbohydrate metabolism;00052 Galactose metabolism [PATH:ko00052];gatY-kbaY; tagatose 1,6-diphosphate aldolase GatY/KbaY [EC:4.1.2.40]	3	0	13	0	3	0	3
K16371	Carbohydrate metabolism;00052 Galactose metabolism [PATH:ko00052];gatZ-kbaZ; D-tagatose-1,6-bisphosphate aldolase subunit GatZ/KbaZ	5	19	15	0	5	0	5
K01854	Carbohydrate metabolism;00052 Galactose metabolism [PATH:ko00052];glf; UDP-galactopyranose mutase [EC:5.4.99.9]	33	1	2	12	4	13	6
K00845	Carbohydrate metabolism;00052 Galactose metabolism [PATH:ko00052];glk; glucokinase [EC:2.7.1.2]	212	35	17	11	1	83	3
K01182	Carbohydrate metabolism;00052 Galactose metabolism [PATH:ko00052];IMA, malL; oligo-1,6-glucosidase [EC:3.2.1.10]	0	0	0	4	1	0	0
K01193	Carbohydrate metabolism;00052 Galactose metabolism [PATH:ko00052];INV, sacA; beta-fructofuranosidase [EC:3.2.1.26]	258	0	29	4	7	13	6
K01635	Carbohydrate metabolism;00052 Galactose metabolism [PATH:ko00052];lacD; tagatose 1,6-diphosphate aldolase [EC:4.1.2.40]	0	0	0	1	0	0	0
K01190	Carbohydrate metabolism;00052 Galactose metabolism [PATH:ko00052];lacZ; beta-galactosidase [EC:3.2.1.23]	629	2	50	41	23	0	19
K01187	Carbohydrate metabolism;00052 Galactose metabolism [PATH:ko00052];malZ; alpha-glucosidase [EC:3.2.1.20]	439	14	53	4	5	8	12
K07406	Carbohydrate metabolism;00052 Galactose metabolism [PATH:ko00052];melA; alpha-galactosidase [EC:3.2.1.22]	130	0	1	4	8	0	0
K00850	Carbohydrate metabolism;00052 Galactose metabolism [PATH:ko00052];pfkA, PFK; 6-phosphofructokinase 1 [EC:2.7.1.11]	358	0	13	29	4	0	4
K16370	Carbohydrate metabolism;00052 Galactose metabolism [PATH:ko00052];pfkB; 6-phosphofructokinase 2 [EC:2.7.1.11]	0	3	15	0	1	0	0
K01835	Carbohydrate metabolism;00052 Galactose metabolism [PATH:ko00052];pgm; phosphoglucomutase [EC:5.4.2.2]	303	0	25	37	8	111	6
K15778	Carbohydrate metabolism;00052 Galactose metabolism [PATH:ko00052];pmm-pgm; phosphomannomutase / phosphoglucomutase [EC:5.4.2.8 5.4.2.2]	0	30	0	0	0	224	0
K02744	Carbohydrate metabolism;00052 Galactose metabolism [PATH:ko00052];PTS-Aga-EIIA, agaF; PTS system, N-acetylgalactosamine-specific IIA component [EC:2.7.1.-]	0	0	8	0	0	0	3
K02745	Carbohydrate metabolism;00052 Galactose metabolism [PATH:ko00052];PTS-Aga-EIIB, agaV; PTS system, N-acetylgalactosamine-specific IIB component [EC:2.7.1.-]	0	0	7	0	0	0	3
K02746	Carbohydrate metabolism;00052 Galactose metabolism [PATH:ko00052];PTS-Aga-EIIC, agaW; PTS system, N-acetylgalactosamine-specific IIC component	0	0	10	0	0	0	3
K02747	Carbohydrate metabolism;00052 Galactose metabolism [PATH:ko00052];PTS-Aga-EIID, agaE; PTS system, N-acetylgalactosamine-specific IID component	0	0	11	0	0	0	3
K02773	Carbohydrate metabolism;00052 Galactose metabolism [PATH:ko00052];PTS-Gat-EIIA, gatA, sgcA; PTS system, galactitol-specific IIA component [EC:2.7.1.200]	2	0	2	2	1	0	1
K02774	Carbohydrate metabolism;00052 Galactose metabolism [PATH:ko00052];PTS-Gat-EIIB, gatB, sgcB; PTS system, galactitol-specific IIB component [EC:2.7.1.200]	2	0	1	3	3	0	0
K02775	Carbohydrate metabolism;00052 Galactose metabolism [PATH:ko00052];PTS-Gat-EIIC, gatC, sgcC; PTS system, galactitol-specific IIC component	3	0	2	3	5	0	0
K00963	Carbohydrate metabolism;00052 Galactose metabolism [PATH:ko00052];UGP2, galU, galF; UTP--glucose-1-phosphate uridylyltransferase [EC:2.7.7.9]	353	39	25	14	2	58	15
K13877	Carbohydrate metabolism;00053 Ascorbate and aldarate metabolism [PATH:ko00053];aldH; 2,5-dioxopentanoate dehydrogenase [EC:1.2.1.26]	0	1	0	0	0	0	0
K00128	Carbohydrate metabolism;00053 Ascorbate and aldarate metabolism [PATH:ko00053];ALDH; aldehyde dehydrogenase (NAD+) [EC:1.2.1.3]	493	198	17	30	3	457	2
K13873	Carbohydrate metabolism;00053 Ascorbate and aldarate metabolism [PATH:ko00053];araA; L-arabinose 1-dehydrogenase [EC:1.1.1.376]	0	19	0	0	0	0	0
K08092	Carbohydrate metabolism;00053 Ascorbate and aldarate metabolism [PATH:ko00053];dlgD; 3-dehydro-L-gulonate 2-dehydrogenase [EC:1.1.1.130]	96	0	6	0	2	0	1
K00064	Carbohydrate metabolism;00053 Ascorbate and aldarate metabolism [PATH:ko00053];E1.1.1.122; D-threo-aldose 1-dehydrogenase [EC:1.1.1.122]	0	26	1	0	1	114	0
K00423	Carbohydrate metabolism;00053 Ascorbate and aldarate metabolism [PATH:ko00053];E1.10.3.3; L-ascorbate oxidase [EC:1.10.3.3]	0	18	0	0	0	0	0
K01053	Carbohydrate metabolism;00053 Ascorbate and aldarate metabolism [PATH:ko00053];E3.1.1.17, gnl, RGN; gluconolactonase [EC:3.1.1.17]	289	24	0	2	5	174	5
K01708	Carbohydrate metabolism;00053 Ascorbate and aldarate metabolism [PATH:ko00053];garD; galactarate dehydratase [EC:4.2.1.42]	359	26	26	11	1	135	2
K01630	Carbohydrate metabolism;00053 Ascorbate and aldarate metabolism [PATH:ko00053];garL; 2-dehydro-3-deoxyglucarate aldolase [EC:4.1.2.20]	179	14	12	8	7	0	0
K18983	Carbohydrate metabolism;00053 Ascorbate and aldarate metabolism [PATH:ko00053];gci; D-galactarolactone cycloisomerase [EC:5.5.1.27]	5	2	0	0	0	0	0
K18982	Carbohydrate metabolism;00053 Ascorbate and aldarate metabolism [PATH:ko00053];gli; D-galactarolactone isomerase [EC:5.4.1.4]	0	10	0	0	0	0	0
K01706	Carbohydrate metabolism;00053 Ascorbate and aldarate metabolism [PATH:ko00053];gudD; glucarate dehydratase [EC:4.2.1.40]	271	45	18	17	5	119	1
K00103	Carbohydrate metabolism;00053 Ascorbate and aldarate metabolism [PATH:ko00053];GULO; L-gulonolactone oxidase [EC:1.1.3.8]	0	23	0	0	0	0	0
K13874	Carbohydrate metabolism;00053 Ascorbate and aldarate metabolism [PATH:ko00053];K13874, araB; L-arabinonolactonase [EC:3.1.1.15]	32	30	0	0	0	0	2
K13875	Carbohydrate metabolism;00053 Ascorbate and aldarate metabolism [PATH:ko00053];K13875, araC; L-arabonate dehydrase [EC:4.2.1.25]	0	19	0	0	0	0	0
K13876	Carbohydrate metabolism;00053 Ascorbate and aldarate metabolism [PATH:ko00053];K13876, araD; 2-keto-3-deoxy-L-arabinonate dehydratase [EC:4.2.1.43]	0	13	0	0	0	0	0
K01707	Carbohydrate metabolism;00053 Ascorbate and aldarate metabolism [PATH:ko00053];kdgD; 5-dehydro-4-deoxyglucarate dehydratase [EC:4.2.1.41]	0	18	0	0	0	67	0
K00880	Carbohydrate metabolism;00053 Ascorbate and aldarate metabolism [PATH:ko00053];lyxK; L-xylulokinase [EC:2.7.1.53]	201	0	15	0	0	0	8
K02821	Carbohydrate metabolism;00053 Ascorbate and aldarate metabolism [PATH:ko00053];PTS-Ula-EIIA, ulaC, sgaA; PTS system, ascorbate-specific IIA component [EC:2.7.1.194]	220	10	31	1	2	0	10
K02822	Carbohydrate metabolism;00053 Ascorbate and aldarate metabolism [PATH:ko00053];PTS-Ula-EIIB, ulaB, sgaB; PTS system, ascorbate-specific IIB component [EC:2.7.1.194]	179	0	18	1	2	0	9
K03475	Carbohydrate metabolism;00053 Ascorbate and aldarate metabolism [PATH:ko00053];PTS-Ula-EIIC, ulaA, sgaT; PTS system, ascorbate-specific IIC component	529	0	22	5	6	0	14
K18981	Carbohydrate metabolism;00053 Ascorbate and aldarate metabolism [PATH:ko00053];udh; uronate dehydrogenase [EC:1.1.1.203]	17	22	0	0	0	71	0
K00012	Carbohydrate metabolism;00053 Ascorbate and aldarate metabolism [PATH:ko00053];UGDH, ugd; UDPglucose 6-dehydrogenase [EC:1.1.1.22]	183	51	17	17	1	119	16
K03078	Carbohydrate metabolism;00053 Ascorbate and aldarate metabolism [PATH:ko00053];ulaD, sgaH; 3-dehydro-L-gulonate-6-phosphate decarboxylase [EC:4.1.1.85]	0	0	11	1	0	0	6
K03079	Carbohydrate metabolism;00053 Ascorbate and aldarate metabolism [PATH:ko00053];ulaE, sgaU; L-ribulose-5-phosphate 3-epimerase [EC:5.1.3.22]	0	0	15	0	1	0	9
K03077	Carbohydrate metabolism;00053 Ascorbate and aldarate metabolism [PATH:ko00053];ulaF, sgaE; L-ribulose-5-phosphate 4-epimerase [EC:5.1.3.4]	0	0	15	0	0	0	2
K03476	Carbohydrate metabolism;00053 Ascorbate and aldarate metabolism [PATH:ko00053];ulaG; L-ascorbate 6-phosphate lactonase [EC:3.1.1.-]	0	0	15	0	1	0	2
K01176	Carbohydrate metabolism;00500 Starch and sucrose metabolism [PATH:ko00500];AMY, amyA, malS; alpha-amylase [EC:3.2.1.1]	265	0	31	21	11	0	10
K00694	Carbohydrate metabolism;00500 Starch and sucrose metabolism [PATH:ko00500];bcsA; cellulose synthase (UDP-forming) [EC:2.4.1.12]	864	30	48	38	13	88	4
K05350	Carbohydrate metabolism;00500 Starch and sucrose metabolism [PATH:ko00500];bglB; beta-glucosidase [EC:3.2.1.21]	1	6	9	0	1	0	1
K05349	Carbohydrate metabolism;00500 Starch and sucrose metabolism [PATH:ko00500];bglX; beta-glucosidase [EC:3.2.1.21]	601	62	49	48	12	156	9
K00690	Carbohydrate metabolism;00500 Starch and sucrose metabolism [PATH:ko00500];E2.4.1.7; sucrose phosphorylase [EC:2.4.1.7]	364	0	11	1	0	0	1
K00847	Carbohydrate metabolism;00500 Starch and sucrose metabolism [PATH:ko00500];E2.7.1.4, scrK; fructokinase [EC:2.7.1.4]	396	55	36	4	6	49	11
K01179	Carbohydrate metabolism;00500 Starch and sucrose metabolism [PATH:ko00500];E3.2.1.4; endoglucanase [EC:3.2.1.4]	233	13	28	18	6	389	4
K01210	Carbohydrate metabolism;00500 Starch and sucrose metabolism [PATH:ko00500];E3.2.1.58; glucan 1,3-beta-glucosidase [EC:3.2.1.58]	0	1	0	0	0	1	0
K01222	Carbohydrate metabolism;00500 Starch and sucrose metabolism [PATH:ko00500];E3.2.1.86A, celF; 6-phospho-beta-glucosidase [EC:3.2.1.86]	32	0	26	0	16	0	6
K01223	Carbohydrate metabolism;00500 Starch and sucrose metabolism [PATH:ko00500];E3.2.1.86B, bglA; 6-phospho-beta-glucosidase [EC:3.2.1.86]	1319	0	144	22	50	0	22
K00700	Carbohydrate metabolism;00500 Starch and sucrose metabolism [PATH:ko00500];GBE1, glgB; 1,4-alpha-glucan branching enzyme [EC:2.4.1.18]	446	30	30	29	9	105	8
K00703	Carbohydrate metabolism;00500 Starch and sucrose metabolism [PATH:ko00500];glgA; starch synthase [EC:2.4.1.21]	282	7	15	12	3	104	4
K00975	Carbohydrate metabolism;00500 Starch and sucrose metabolism [PATH:ko00500];glgC; glucose-1-phosphate adenylyltransferase [EC:2.7.7.27]	262	3	19	13	3	0	6
K16147	Carbohydrate metabolism;00500 Starch and sucrose metabolism [PATH:ko00500];glgE; starch synthase (maltosyl-transferring) [EC:2.4.99.16]	0	39	0	0	0	130	0
K02438	Carbohydrate metabolism;00500 Starch and sucrose metabolism [PATH:ko00500];glgX; glycogen debranching enzyme [EC:3.2.1.196]	776	58	51	23	6	212	4
K00845	Carbohydrate metabolism;00500 Starch and sucrose metabolism [PATH:ko00500];glk; glucokinase [EC:2.7.1.2]	212	35	17	11	1	83	3
K01232	Carbohydrate metabolism;00500 Starch and sucrose metabolism [PATH:ko00500];glvA; maltose-6'-phosphate glucosidase [EC:3.2.1.122]	3	0	40	0	6	0	0
K01810	Carbohydrate metabolism;00500 Starch and sucrose metabolism [PATH:ko00500];GPI, pgi; glucose-6-phosphate isomerase [EC:5.3.1.9]	338	28	17	16	3	126	6
K01182	Carbohydrate metabolism;00500 Starch and sucrose metabolism [PATH:ko00500];IMA, malL; oligo-1,6-glucosidase [EC:3.2.1.10]	0	0	0	4	1	0	0
K01193	Carbohydrate metabolism;00500 Starch and sucrose metabolism [PATH:ko00500];INV, sacA; beta-fructofuranosidase [EC:3.2.1.26]	258	0	29	4	7	13	6
K18775	Carbohydrate metabolism;00500 Starch and sucrose metabolism [PATH:ko00500];lf2; levanbiose-producing levanase [EC:3.2.1.64]	0	31	0	0	0	0	0
K00705	Carbohydrate metabolism;00500 Starch and sucrose metabolism [PATH:ko00500];malQ; 4-alpha-glucanotransferase [EC:2.4.1.25]	900	27	30	27	2	140	4
K01187	Carbohydrate metabolism;00500 Starch and sucrose metabolism [PATH:ko00500];malZ; alpha-glucosidase [EC:3.2.1.20]	439	14	53	4	5	8	12
K00697	Carbohydrate metabolism;00500 Starch and sucrose metabolism [PATH:ko00500];otsA; trehalose 6-phosphate synthase [EC:2.4.1.15]	588	89	16	12	0	78	3
K01087	Carbohydrate metabolism;00500 Starch and sucrose metabolism [PATH:ko00500];otsB; trehalose 6-phosphate phosphatase [EC:3.1.3.12]	150	16	17	10	0	50	2
K06859	Carbohydrate metabolism;00500 Starch and sucrose metabolism [PATH:ko00500];pgi1; glucose-6-phosphate isomerase, archaeal [EC:5.3.1.9]	1	1	2	0	0	0	0
K01835	Carbohydrate metabolism;00500 Starch and sucrose metabolism [PATH:ko00500];pgm; phosphoglucomutase [EC:5.4.2.2]	303	0	25	37	8	111	6
K01838	Carbohydrate metabolism;00500 Starch and sucrose metabolism [PATH:ko00500];pgmB; beta-phosphoglucomutase [EC:5.4.2.6]	0	0	6	0	0	0	0
K15778	Carbohydrate metabolism;00500 Starch and sucrose metabolism [PATH:ko00500];pmm-pgm; phosphomannomutase / phosphoglucomutase [EC:5.4.2.8 5.4.2.2]	0	30	0	0	0	224	0
K02759	Carbohydrate metabolism;00500 Starch and sucrose metabolism [PATH:ko00500];PTS-Cel-EIIA, celC, chbA; PTS system, cellobiose-specific IIA component [EC:2.7.1.196 2.7.1.205]	88	0	29	3	2	0	3
K02760	Carbohydrate metabolism;00500 Starch and sucrose metabolism [PATH:ko00500];PTS-Cel-EIIB, celA, chbB; PTS system, cellobiose-specific IIB component [EC:2.7.1.196 2.7.1.205]	123	0	37	5	8	0	7
K02761	Carbohydrate metabolism;00500 Starch and sucrose metabolism [PATH:ko00500];PTS-Cel-EIIC, celB, chbC; PTS system, cellobiose-specific IIC component	308	0	87	11	27	0	7
K02777	Carbohydrate metabolism;00500 Starch and sucrose metabolism [PATH:ko00500];PTS-Glc-EIIA, crr; PTS system, sugar-specific IIA component [EC:2.7.1.-]	108	0	8	11	3	0	3
K02750	Carbohydrate metabolism;00500 Starch and sucrose metabolism [PATH:ko00500];PTS-Glv-EIIC, glvC, malP, aglA; PTS system, alpha-glucoside-specific IIC component	2	0	27	0	1	0	2
K02791	Carbohydrate metabolism;00500 Starch and sucrose metabolism [PATH:ko00500];PTS-MalGlc-EIIC, malX; PTS system, maltose/glucose-specific IIC component	393	0	54	14	11	0	14
K02810	Carbohydrate metabolism;00500 Starch and sucrose metabolism [PATH:ko00500];PTS-Scr-EIIC, scrA, sacP, sacX, ptsS; PTS system, sucrose-specific IIC component	248	3	32	5	1	0	9
K02819	Carbohydrate metabolism;00500 Starch and sucrose metabolism [PATH:ko00500];PTS-Tre-EIIC, treB; PTS system, trehalose-specific IIC component	14	0	23	3	3	0	13
K00688	Carbohydrate metabolism;00500 Starch and sucrose metabolism [PATH:ko00500];PYG, glgP; glycogen phosphorylase [EC:2.4.1.1]	1355	19	70	39	4	169	9
K00978	Carbohydrate metabolism;00500 Starch and sucrose metabolism [PATH:ko00500];rfbF; glucose-1-phosphate cytidylyltransferase [EC:2.7.7.33]	1	0	1	1	0	16	0
K00692	Carbohydrate metabolism;00500 Starch and sucrose metabolism [PATH:ko00500];sacB; levansucrase [EC:2.4.1.10]	0	21	0	2	0	0	0
K01212	Carbohydrate metabolism;00500 Starch and sucrose metabolism [PATH:ko00500];sacC, levB; levanase [EC:3.2.1.65]	0	0	0	2	2	0	0
K01178	Carbohydrate metabolism;00500 Starch and sucrose metabolism [PATH:ko00500];SGA1; glucoamylase [EC:3.2.1.3]	199	3	0	0	0	146	0
K07024	Carbohydrate metabolism;00500 Starch and sucrose metabolism [PATH:ko00500];SPP; sucrose-6-phosphatase&#160	995	28	45	43	11	73	13
K13810	Carbohydrate metabolism;00500 Starch and sucrose metabolism [PATH:ko00500];tal-pgi; transaldolase / glucose-6-phosphate isomerase [EC:2.2.1.2 5.3.1.9]	0	0	0	0	0	121	0
K01226	Carbohydrate metabolism;00500 Starch and sucrose metabolism [PATH:ko00500];treC; trehalose-6-phosphate hydrolase [EC:3.2.1.93]	13	0	35	23	5	0	17
K01194	Carbohydrate metabolism;00500 Starch and sucrose metabolism [PATH:ko00500];TREH, treA, treF; alpha,alpha-trehalase [EC:3.2.1.28]	678	39	61	32	4	78	0
K05343	Carbohydrate metabolism;00500 Starch and sucrose metabolism [PATH:ko00500];treS; maltose alpha-D-glucosyltransferase / alpha-amylase [EC:5.4.99.16 3.2.1.1]	0	45	14	0	1	189	0
K06044	Carbohydrate metabolism;00500 Starch and sucrose metabolism [PATH:ko00500];treY, glgY; (1->4)-alpha-D-glucan 1-alpha-D-glucosylmutase [EC:5.4.99.15]	450	29	18	5	3	174	0
K01236	Carbohydrate metabolism;00500 Starch and sucrose metabolism [PATH:ko00500];treZ, glgZ; maltooligosyltrehalose trehalohydrolase [EC:3.2.1.141]	0	44	0	0	0	134	0
K00963	Carbohydrate metabolism;00500 Starch and sucrose metabolism [PATH:ko00500];UGP2, galU, galF; UTP--glucose-1-phosphate uridylyltransferase [EC:2.7.7.9]	353	39	25	14	2	58	15
K01209	Carbohydrate metabolism;00520 Amino sugar and nucleotide sugar metabolism [PATH:ko00520];abfA; alpha-N-arabinofuranosidase [EC:3.2.1.55]	160	0	0	0	0	0	0
K16011	Carbohydrate metabolism;00520 Amino sugar and nucleotide sugar metabolism [PATH:ko00520];algA, xanB, rfbA, wbpW, pslB; mannose-1-phosphate guanylyltransferase / mannose-6-phosphate isomerase [EC:2.7.7.13 5.3.1.8]	0	66	0	0	0	123	0
K00066	Carbohydrate metabolism;00520 Amino sugar and nucleotide sugar metabolism [PATH:ko00520];algD; GDP-mannose 6-dehydrogenase [EC:1.1.1.132]	0	0	0	0	0	16	0
K07102	Carbohydrate metabolism;00520 Amino sugar and nucleotide sugar metabolism [PATH:ko00520];amgK; anomeric MurNAc/GlcNAc kinase [EC:2.7.1.-]	0	22	0	0	0	77	0
K10011	Carbohydrate metabolism;00520 Amino sugar and nucleotide sugar metabolism [PATH:ko00520];arnA, pmrI; UDP-4-amino-4-deoxy-L-arabinose formyltransferase / UDP-glucuronic acid dehydrogenase (UDP-4-keto-hexauronic acid decarboxylating) [EC:2.1.2.13 1.1.1.305]	428	1	28	28	4	210	5
K07806	Carbohydrate metabolism;00520 Amino sugar and nucleotide sugar metabolism [PATH:ko00520];arnB, pmrH; UDP-4-amino-4-deoxy-L-arabinose-oxoglutarate aminotransferase [EC:2.6.1.87]	221	0	17	22	1	148	4
K10012	Carbohydrate metabolism;00520 Amino sugar and nucleotide sugar metabolism [PATH:ko00520];arnC, pmrF; undecaprenyl-phosphate 4-deoxy-4-formamido-L-arabinose transferase [EC:2.4.2.53]	188	19	12	15	2	120	4
K13014	Carbohydrate metabolism;00520 Amino sugar and nucleotide sugar metabolism [PATH:ko00520];arnD; undecaprenyl phosphate-alpha-L-ara4FN deformylase [EC:3.5.1.-]	166	0	34	16	3	108	3
K12452	Carbohydrate metabolism;00520 Amino sugar and nucleotide sugar metabolism [PATH:ko00520];ascC, ddhC, rfbH; CDP-4-dehydro-6-deoxyglucose reductase, E1 [EC:1.17.1.1]	0	1	1	0	0	16	0
K00523	Carbohydrate metabolism;00520 Amino sugar and nucleotide sugar metabolism [PATH:ko00520];ascD, ddhD, rfbI; CDP-4-dehydro-6-deoxyglucose reductase, E3 [EC:1.17.1.1]	0	29	1	0	0	73	0
K15858	Carbohydrate metabolism;00520 Amino sugar and nucleotide sugar metabolism [PATH:ko00520];ascF; CDP-3, 6-dideoxy-D-glycero-L-glycero-4-hexulose-4-reductase [EC:1.1.1.-]	0	0	1	0	0	0	0
K17716	Carbohydrate metabolism;00520 Amino sugar and nucleotide sugar metabolism [PATH:ko00520];capD; UDP-glucose 4-epimerase [EC:5.1.3.2]	8	0	0	0	0	0	0
K13381	Carbohydrate metabolism;00520 Amino sugar and nucleotide sugar metabolism [PATH:ko00520];chiA; bifunctional chitinase/lysozyme [EC:3.2.1.14 3.2.1.17]	0	0	2	0	0	0	0
K01654	Carbohydrate metabolism;00520 Amino sugar and nucleotide sugar metabolism [PATH:ko00520];E2.5.1.56, neuB; N-acetylneuraminate synthase [EC:2.5.1.56]	0	1	2	0	0	62	1
K00847	Carbohydrate metabolism;00520 Amino sugar and nucleotide sugar metabolism [PATH:ko00520];E2.7.1.4, scrK; fructokinase [EC:2.7.1.4]	396	55	36	4	6	49	11
K01183	Carbohydrate metabolism;00520 Amino sugar and nucleotide sugar metabolism [PATH:ko00520];E3.2.1.14; chitinase [EC:3.2.1.14]	4	21	47	6	6	14	18
K01452	Carbohydrate metabolism;00520 Amino sugar and nucleotide sugar metabolism [PATH:ko00520];E3.5.1.41; chitin deacetylase [EC:3.5.1.41]	0	11	0	0	0	4	0
K01639	Carbohydrate metabolism;00520 Amino sugar and nucleotide sugar metabolism [PATH:ko00520];E4.1.3.3, nanA, NPL; N-acetylneuraminate lyase [EC:4.1.3.3]	0	0	2	0	0	0	0
K08679	Carbohydrate metabolism;00520 Amino sugar and nucleotide sugar metabolism [PATH:ko00520];E5.1.3.6; UDP-glucuronate 4-epimerase [EC:5.1.3.6]	189	0	18	14	5	3	7
K02473	Carbohydrate metabolism;00520 Amino sugar and nucleotide sugar metabolism [PATH:ko00520];E5.1.3.7, wbpP; UDP-N-acetylglucosamine 4-epimerase [EC:5.1.3.7]	0	2	0	0	0	1	0
K01784	Carbohydrate metabolism;00520 Amino sugar and nucleotide sugar metabolism [PATH:ko00520];galE, GALE; UDP-glucose 4-epimerase [EC:5.1.3.2]	303	51	16	15	0	117	14
K00849	Carbohydrate metabolism;00520 Amino sugar and nucleotide sugar metabolism [PATH:ko00520];galK; galactokinase [EC:2.7.1.6]	233	0	23	14	5	0	7
K00965	Carbohydrate metabolism;00520 Amino sugar and nucleotide sugar metabolism [PATH:ko00520];galT, GALT; UDPglucose--hexose-1-phosphate uridylyltransferase [EC:2.7.7.12]	256	0	16	8	8	0	13
K01854	Carbohydrate metabolism;00520 Amino sugar and nucleotide sugar metabolism [PATH:ko00520];glf; UDP-galactopyranose mutase [EC:5.4.99.9]	33	1	2	12	4	13	6
K00975	Carbohydrate metabolism;00520 Amino sugar and nucleotide sugar metabolism [PATH:ko00520];glgC; glucose-1-phosphate adenylyltransferase [EC:2.7.7.27]	262	3	19	13	3	0	6
K00845	Carbohydrate metabolism;00520 Amino sugar and nucleotide sugar metabolism [PATH:ko00520];glk; glucokinase [EC:2.7.1.2]	212	35	17	11	1	83	3
K03431	Carbohydrate metabolism;00520 Amino sugar and nucleotide sugar metabolism [PATH:ko00520];glmM; phosphoglucosamine mutase [EC:5.4.2.10]	280	26	17	13	3	83	14
K00820	Carbohydrate metabolism;00520 Amino sugar and nucleotide sugar metabolism [PATH:ko00520];glmS, GFPT; glucosamine--fructose-6-phosphate aminotransferase (isomerizing) [EC:2.6.1.16]	274	122	26	12	10	230	6
K04042	Carbohydrate metabolism;00520 Amino sugar and nucleotide sugar metabolism [PATH:ko00520];glmU; bifunctional UDP-N-acetylglucosamine pyrophosphorylase / Glucosamine-1-phosphate N-acetyltransferase [EC:2.7.7.23 2.3.1.157]	323	17	21	15	4	107	5
K01711	Carbohydrate metabolism;00520 Amino sugar and nucleotide sugar metabolism [PATH:ko00520];gmd, GMDS; GDPmannose 4,6-dehydratase [EC:4.2.1.47]	24	43	10	3	1	72	0
K00966	Carbohydrate metabolism;00520 Amino sugar and nucleotide sugar metabolism [PATH:ko00520];GMPP; mannose-1-phosphate guanylyltransferase [EC:2.7.7.13]	0	0	0	0	0	1	0
K01810	Carbohydrate metabolism;00520 Amino sugar and nucleotide sugar metabolism [PATH:ko00520];GPI, pgi; glucose-6-phosphate isomerase [EC:5.3.1.9]	338	28	17	16	3	126	6
K18676	Carbohydrate metabolism;00520 Amino sugar and nucleotide sugar metabolism [PATH:ko00520];gspK; glucosamine kinase [EC:2.7.1.8]	180	15	1	0	0	0	0
K12373	Carbohydrate metabolism;00520 Amino sugar and nucleotide sugar metabolism [PATH:ko00520];HEXA_B; hexosaminidase [EC:3.2.1.52]	385	23	44	28	1	0	18
K01809	Carbohydrate metabolism;00520 Amino sugar and nucleotide sugar metabolism [PATH:ko00520];manA, MPI; mannose-6-phosphate isomerase [EC:5.3.1.8]	231	26	28	8	10	27	5
K01840	Carbohydrate metabolism;00520 Amino sugar and nucleotide sugar metabolism [PATH:ko00520];manB; phosphomannomutase [EC:5.4.2.8]	33	0	19	3	14	0	6
K00971	Carbohydrate metabolism;00520 Amino sugar and nucleotide sugar metabolism [PATH:ko00520];manC, cpsB; mannose-1-phosphate guanylyltransferase [EC:2.7.7.13]	40	12	18	2	7	25	8
K00790	Carbohydrate metabolism;00520 Amino sugar and nucleotide sugar metabolism [PATH:ko00520];murA; UDP-N-acetylglucosamine 1-carboxyvinyltransferase [EC:2.5.1.7]	251	29	22	12	2	57	5
K00075	Carbohydrate metabolism;00520 Amino sugar and nucleotide sugar metabolism [PATH:ko00520];murB; UDP-N-acetylmuramate dehydrogenase [EC:1.3.1.98]	225	24	15	8	1	80	3
K07106	Carbohydrate metabolism;00520 Amino sugar and nucleotide sugar metabolism [PATH:ko00520];murQ; N-acetylmuramic acid 6-phosphate etherase [EC:4.2.1.126]	248	1	32	14	4	0	6
K00992	Carbohydrate metabolism;00520 Amino sugar and nucleotide sugar metabolism [PATH:ko00520];murU; MurNAc alpha-1-phosphate uridylyltransferase [EC:2.7.7.-]	0	18	0	0	0	56	0
K01443	Carbohydrate metabolism;00520 Amino sugar and nucleotide sugar metabolism [PATH:ko00520];nagA, AMDHD2; N-acetylglucosamine-6-phosphate deacetylase [EC:3.5.1.25]	225	20	19	13	0	15	6
K02564	Carbohydrate metabolism;00520 Amino sugar and nucleotide sugar metabolism [PATH:ko00520];nagB, GNPDA; glucosamine-6-phosphate deaminase [EC:3.5.99.6]	152	0	24	14	4	0	3
K00884	Carbohydrate metabolism;00520 Amino sugar and nucleotide sugar metabolism [PATH:ko00520];NAGK, nagK; N-acetylglucosamine kinase [EC:2.7.1.59]	24	0	14	12	3	0	7
K01207	Carbohydrate metabolism;00520 Amino sugar and nucleotide sugar metabolism [PATH:ko00520];nagZ; beta-N-acetylhexosaminidase [EC:3.2.1.52]	180	20	17	13	0	80	12
K01788	Carbohydrate metabolism;00520 Amino sugar and nucleotide sugar metabolism [PATH:ko00520];nanE; N-acylglucosamine-6-phosphate 2-epimerase [EC:5.1.3.9]	6	0	10	2	5	0	2
K00885	Carbohydrate metabolism;00520 Amino sugar and nucleotide sugar metabolism [PATH:ko00520];nanK; N-acylmannosamine kinase [EC:2.7.1.60]	1	0	2	0	0	0	0
K00983	Carbohydrate metabolism;00520 Amino sugar and nucleotide sugar metabolism [PATH:ko00520];neuA; N-acylneuraminate cytidylyltransferase [EC:2.7.7.43]	0	0	0	0	0	26	1
K13010	Carbohydrate metabolism;00520 Amino sugar and nucleotide sugar metabolism [PATH:ko00520];per, rfbE; perosamine synthetase [EC:2.6.1.102]	2	2	0	0	0	0	0
K06859	Carbohydrate metabolism;00520 Amino sugar and nucleotide sugar metabolism [PATH:ko00520];pgi1; glucose-6-phosphate isomerase, archaeal [EC:5.3.1.9]	1	1	2	0	0	0	0
K01835	Carbohydrate metabolism;00520 Amino sugar and nucleotide sugar metabolism [PATH:ko00520];pgm; phosphoglucomutase [EC:5.4.2.2]	303	0	25	37	8	111	6
K15778	Carbohydrate metabolism;00520 Amino sugar and nucleotide sugar metabolism [PATH:ko00520];pmm-pgm; phosphomannomutase / phosphoglucomutase [EC:5.4.2.8 5.4.2.2]	0	30	0	0	0	224	0
K00886	Carbohydrate metabolism;00520 Amino sugar and nucleotide sugar metabolism [PATH:ko00520];ppgK; polyphosphate glucokinase [EC:2.7.1.63]	79	6	0	0	0	0	0
K15894	Carbohydrate metabolism;00520 Amino sugar and nucleotide sugar metabolism [PATH:ko00520];pseB; UDP-N-acetylglucosamine 4,6-dehydratase [EC:4.2.1.115]	0	0	0	0	0	34	0
K15897	Carbohydrate metabolism;00520 Amino sugar and nucleotide sugar metabolism [PATH:ko00520];pseG; UDP-2,4-diacetamido-2,4,6-trideoxy-beta-L-altropyranose hydrolase [EC:3.6.1.57]	0	0	0	0	0	2	0
K02765	Carbohydrate metabolism;00520 Amino sugar and nucleotide sugar metabolism [PATH:ko00520];PTS-Dgl-EIIC, gamP; PTS system, D-glucosamine-specific IIC component	33	0	27	0	5	0	0
K02777	Carbohydrate metabolism;00520 Amino sugar and nucleotide sugar metabolism [PATH:ko00520];PTS-Glc-EIIA, crr; PTS system, sugar-specific IIA component [EC:2.7.1.-]	108	0	8	11	3	0	3
K02778	Carbohydrate metabolism;00520 Amino sugar and nucleotide sugar metabolism [PATH:ko00520];PTS-Glc-EIIB, ptsG; PTS system, glucose-specific IIB component [EC:2.7.1.199]	36	0	1	1	3	0	0
K02779	Carbohydrate metabolism;00520 Amino sugar and nucleotide sugar metabolism [PATH:ko00520];PTS-Glc-EIIC, ptsG; PTS system, glucose-specific IIC component	220	1	16	8	2	0	8
K02791	Carbohydrate metabolism;00520 Amino sugar and nucleotide sugar metabolism [PATH:ko00520];PTS-MalGlc-EIIC, malX; PTS system, maltose/glucose-specific IIC component	393	0	54	14	11	0	14
K02793	Carbohydrate metabolism;00520 Amino sugar and nucleotide sugar metabolism [PATH:ko00520];PTS-Man-EIIA, manX; PTS system, mannose-specific IIA component [EC:2.7.1.191]	0	0	1	0	0	0	0
K02794	Carbohydrate metabolism;00520 Amino sugar and nucleotide sugar metabolism [PATH:ko00520];PTS-Man-EIIB, manX; PTS system, mannose-specific IIB component [EC:2.7.1.191]	164	0	20	2	0	0	7
K02795	Carbohydrate metabolism;00520 Amino sugar and nucleotide sugar metabolism [PATH:ko00520];PTS-Man-EIIC, manY; PTS system, mannose-specific IIC component	136	0	22	13	4	0	4
K02796	Carbohydrate metabolism;00520 Amino sugar and nucleotide sugar metabolism [PATH:ko00520];PTS-Man-EIID, manZ; PTS system, mannose-specific IID component	159	0	22	3	1	0	5
K11192	Carbohydrate metabolism;00520 Amino sugar and nucleotide sugar metabolism [PATH:ko00520];PTS-Mur-EIIC, murP; PTS system, N-acetylmuramic acid-specific IIC component	280	0	4	0	7	0	0
K02804	Carbohydrate metabolism;00520 Amino sugar and nucleotide sugar metabolism [PATH:ko00520];PTS-Nag-EIIC, nagE; PTS system, N-acetylglucosamine-specific IIC component	315	30	31	20	3	19	10
K00978	Carbohydrate metabolism;00520 Amino sugar and nucleotide sugar metabolism [PATH:ko00520];rfbF; glucose-1-phosphate cytidylyltransferase [EC:2.7.7.33]	1	0	1	1	0	16	0
K01709	Carbohydrate metabolism;00520 Amino sugar and nucleotide sugar metabolism [PATH:ko00520];rfbG; CDP-glucose 4,6-dehydratase [EC:4.2.1.45]	0	0	1	1	0	19	0
K15856	Carbohydrate metabolism;00520 Amino sugar and nucleotide sugar metabolism [PATH:ko00520];rmd; GDP-4-dehydro-6-deoxy-D-mannose reductase [EC:1.1.1.281]	0	0	0	0	0	27	0
K08068	Carbohydrate metabolism;00520 Amino sugar and nucleotide sugar metabolism [PATH:ko00520];siaA, neuC1; UDP-N-acetylglucosamine 2-epimerase (hydrolysing) [EC:3.2.1.183]	0	11	0	0	0	0	0
K13810	Carbohydrate metabolism;00520 Amino sugar and nucleotide sugar metabolism [PATH:ko00520];tal-pgi; transaldolase / glucose-6-phosphate isomerase [EC:2.2.1.2 5.3.1.9]	0	0	0	0	0	121	0
K02377	Carbohydrate metabolism;00520 Amino sugar and nucleotide sugar metabolism [PATH:ko00520];TSTA3, fcl; GDP-L-fucose synthase [EC:1.1.1.271]	1	2	10	0	0	2	0
K00012	Carbohydrate metabolism;00520 Amino sugar and nucleotide sugar metabolism [PATH:ko00520];UGDH, ugd; UDPglucose 6-dehydrogenase [EC:1.1.1.22]	183	51	17	17	1	119	16
K00963	Carbohydrate metabolism;00520 Amino sugar and nucleotide sugar metabolism [PATH:ko00520];UGP2, galU, galF; UTP--glucose-1-phosphate uridylyltransferase [EC:2.7.7.9]	353	39	25	14	2	58	15
K08678	Carbohydrate metabolism;00520 Amino sugar and nucleotide sugar metabolism [PATH:ko00520];UXS1, uxs; UDP-glucuronate decarboxylase [EC:4.1.1.35]	0	16	0	0	0	0	0
K02474	Carbohydrate metabolism;00520 Amino sugar and nucleotide sugar metabolism [PATH:ko00520];wbpO; UDP-N-acetyl-D-galactosamine dehydrogenase [EC:1.1.1.-]	0	1	0	0	0	0	0
K01791	Carbohydrate metabolism;00520 Amino sugar and nucleotide sugar metabolism [PATH:ko00520];wecB; UDP-N-acetylglucosamine 2-epimerase (non-hydrolysing) [EC:5.1.3.14]	265	29	18	23	4	14	5
K02472	Carbohydrate metabolism;00520 Amino sugar and nucleotide sugar metabolism [PATH:ko00520];wecC; UDP-N-acetyl-D-mannosaminuronic acid dehydrogenase [EC:1.1.1.336]	307	11	15	17	6	0	5
K01198	Carbohydrate metabolism;00520 Amino sugar and nucleotide sugar metabolism [PATH:ko00520];xynB; xylan 1,4-beta-xylosidase [EC:3.2.1.37]	0	0	23	1	2	0	1
K01093	Carbohydrate metabolism;00562 Inositol phosphate metabolism [PATH:ko00562];appA; 4-phytase / acid phosphatase [EC:3.1.3.26 3.1.3.2]	294	0	3	16	0	0	0
K01092	Carbohydrate metabolism;00562 Inositol phosphate metabolism [PATH:ko00562];E3.1.3.25, IMPA, suhB; myo-inositol-1(or 4)-monophosphatase [EC:3.1.3.25]	561	15	18	11	11	187	7
K03337	Carbohydrate metabolism;00562 Inositol phosphate metabolism [PATH:ko00562];iolB; 5-deoxy-glucuronate isomerase [EC:5.3.1.30]	201	18	15	9	0	75	5
K03338	Carbohydrate metabolism;00562 Inositol phosphate metabolism [PATH:ko00562];iolC; 5-dehydro-2-deoxygluconokinase [EC:2.7.1.92]	429	25	22	21	1	150	12
K03336	Carbohydrate metabolism;00562 Inositol phosphate metabolism [PATH:ko00562];iolD; 3D-(3,5/4)-trihydroxycyclohexane-1,2-dione acylhydrolase (decyclizing) [EC:3.7.1.22]	387	22	18	29	3	136	9
K03335	Carbohydrate metabolism;00562 Inositol phosphate metabolism [PATH:ko00562];iolE; inosose dehydratase [EC:4.2.1.44]	478	37	9	21	2	104	9
K00010	Carbohydrate metabolism;00562 Inositol phosphate metabolism [PATH:ko00562];iolG; myo-inositol 2-dehydrogenase / D-chiro-inositol 1-dehydrogenase [EC:1.1.1.18 1.1.1.369]	468	40	15	29	19	85	12
K06606	Carbohydrate metabolism;00562 Inositol phosphate metabolism [PATH:ko00562];iolI; 2-keto-myo-inositol isomerase [EC:5.3.99.11]	144	9	1	13	0	39	4
K16044	Carbohydrate metabolism;00562 Inositol phosphate metabolism [PATH:ko00562];iolW; scyllo-inositol 2-dehydrogenase (NADP+) [EC:1.1.1.371]	44	1	0	17	0	0	0
K00140	Carbohydrate metabolism;00562 Inositol phosphate metabolism [PATH:ko00562];mmsA, iolA, ALDH6A1; malonate-semialdehyde dehydrogenase (acetylating) / methylmalonate-semialdehyde dehydrogenase [EC:1.2.1.18 1.2.1.27]	324	102	14	31	1	318	19
K01771	Carbohydrate metabolism;00562 Inositol phosphate metabolism [PATH:ko00562];plc; 1-phosphatidylinositol phosphodiesterase [EC:4.6.1.13]	0	15	0	0	0	7	0
K01114	Carbohydrate metabolism;00562 Inositol phosphate metabolism [PATH:ko00562];plc; phospholipase C [EC:3.1.4.3]	0	243	0	0	0	0	4
K01803	Carbohydrate metabolism;00562 Inositol phosphate metabolism [PATH:ko00562];TPI, tpiA; triosephosphate isomerase (TIM) [EC:5.3.1.1]	198	18	11	15	7	47	3
K18118	Carbohydrate metabolism;00620 Pyruvate metabolism [PATH:ko00620];aarC, cat1; succinyl-CoA:acetate CoA-transferase [EC:2.8.3.18]	0	21	0	0	0	106	0
K01962	Carbohydrate metabolism;00620 Pyruvate metabolism [PATH:ko00620];accA; acetyl-CoA carboxylase carboxyl transferase subunit alpha [EC:6.4.1.2]	171	12	11	16	5	67	4
K02160	Carbohydrate metabolism;00620 Pyruvate metabolism [PATH:ko00620];accB, bccP; acetyl-CoA carboxylase biotin carboxyl carrier protein	101	14	5	8	22	39	4
K01961	Carbohydrate metabolism;00620 Pyruvate metabolism [PATH:ko00620];accC; acetyl-CoA carboxylase, biotin carboxylase subunit [EC:6.4.1.2 6.3.4.14]	194	24	11	39	5	133	5
K01963	Carbohydrate metabolism;00620 Pyruvate metabolism [PATH:ko00620];accD; acetyl-CoA carboxylase carboxyl transferase subunit beta [EC:6.4.1.2]	148	16	10	11	1	44	5
K01638	Carbohydrate metabolism;00620 Pyruvate metabolism [PATH:ko00620];aceB, glcB; malate synthase [EC:2.3.3.9]	356	46	28	0	8	209	4
K00163	Carbohydrate metabolism;00620 Pyruvate metabolism [PATH:ko00620];aceE; pyruvate dehydrogenase E1 component [EC:1.2.4.1]	426	97	28	22	7	193	13
K00925	Carbohydrate metabolism;00620 Pyruvate metabolism [PATH:ko00620];ackA; acetate kinase [EC:2.7.2.1]	250	18	17	11	1	10	4
K01895	Carbohydrate metabolism;00620 Pyruvate metabolism [PATH:ko00620];ACSS, acs; acetyl-CoA synthetase [EC:6.2.1.1]	337	105	29	28	4	348	6
K01512	Carbohydrate metabolism;00620 Pyruvate metabolism [PATH:ko00620];acyP; acylphosphatase [EC:3.6.1.7]	108	16	8	8	0	37	3
K04072	Carbohydrate metabolism;00620 Pyruvate metabolism [PATH:ko00620];adhE; acetaldehyde dehydrogenase / alcohol dehydrogenase [EC:1.2.1.10 1.1.1.1]	398	0	26	8	4	0	8
K07248	Carbohydrate metabolism;00620 Pyruvate metabolism [PATH:ko00620];aldA; lactaldehyde dehydrogenase / glycolaldehyde dehydrogenase [EC:1.2.1.22 1.2.1.21]	146	9	9	15	1	28	0
K00138	Carbohydrate metabolism;00620 Pyruvate metabolism [PATH:ko00620];aldB; aldehyde dehydrogenase [EC:1.2.1.-]	299	27	17	20	7	23	6
K00128	Carbohydrate metabolism;00620 Pyruvate metabolism [PATH:ko00620];ALDH; aldehyde dehydrogenase (NAD+) [EC:1.2.1.3]	493	198	17	30	3	457	2
K11263	Carbohydrate metabolism;00620 Pyruvate metabolism [PATH:ko00620];bccA; acetyl-CoA/propionyl-CoA carboxylase, biotin carboxylase, biotin carboxyl carrier protein [EC:6.4.1.2 6.4.1.3 6.3.4.14]	0	6	0	0	0	40	0
K01003	Carbohydrate metabolism;00620 Pyruvate metabolism [PATH:ko00620];bcpA; oxaloacetate decarboxylase [EC:4.1.1.3]	0	1	0	0	0	64	0
K18366	Carbohydrate metabolism;00620 Pyruvate metabolism [PATH:ko00620];bphJ, xylQ, nahO, tesF; acetaldehyde/propanal dehydrogenase [EC:1.2.1.10 1.2.1.87]	0	3	0	0	0	0	0
K00627	Carbohydrate metabolism;00620 Pyruvate metabolism [PATH:ko00620];DLAT, aceF, pdhC; pyruvate dehydrogenase E2 component (dihydrolipoamide acetyltransferase) [EC:2.3.1.12]	339	49	22	14	11	197	5
K00382	Carbohydrate metabolism;00620 Pyruvate metabolism [PATH:ko00620];DLD, lpd, pdhD; dihydrolipoamide dehydrogenase [EC:1.8.1.4]	228	108	22	11	10	316	12
K03777	Carbohydrate metabolism;00620 Pyruvate metabolism [PATH:ko00620];dld; D-lactate dehydrogenase (quinone) [EC:1.1.5.12]	321	9	22	26	4	29	6
K00029	Carbohydrate metabolism;00620 Pyruvate metabolism [PATH:ko00620];E1.1.1.40, maeB; malate dehydrogenase (oxaloacetate-decarboxylating)(NADP+) [EC:1.1.1.40]	273	133	27	26	1	111	4
K00656	Carbohydrate metabolism;00620 Pyruvate metabolism [PATH:ko00620];E2.3.1.54, pflD; formate C-acetyltransferase [EC:2.3.1.54]	300	0	90	11	18	0	12
K00625	Carbohydrate metabolism;00620 Pyruvate metabolism [PATH:ko00620];E2.3.1.8, pta; phosphate acetyltransferase [EC:2.3.1.8]	0	13	0	0	0	0	0
K00626	Carbohydrate metabolism;00620 Pyruvate metabolism [PATH:ko00620];E2.3.1.9, atoB; acetyl-CoA C-acetyltransferase [EC:2.3.1.9]	18	199	27	0	15	331	10
K01067	Carbohydrate metabolism;00620 Pyruvate metabolism [PATH:ko00620];E3.1.2.1, ACH1; acetyl-CoA hydrolase [EC:3.1.2.1]	0	4	0	0	0	0	0
K01069	Carbohydrate metabolism;00620 Pyruvate metabolism [PATH:ko00620];E3.1.2.6, gloB; hydroxyacylglutathione hydrolase [EC:3.1.2.6]	204	16	18	11	1	52	4
K01596	Carbohydrate metabolism;00620 Pyruvate metabolism [PATH:ko00620];E4.1.1.32, pckA, PCK; phosphoenolpyruvate carboxykinase (GTP) [EC:4.1.1.32]	0	37	0	0	0	0	0
K01610	Carbohydrate metabolism;00620 Pyruvate metabolism [PATH:ko00620];E4.1.1.49, pckA; phosphoenolpyruvate carboxykinase (ATP) [EC:4.1.1.49]	374	0	41	28	15	97	7
K01676	Carbohydrate metabolism;00620 Pyruvate metabolism [PATH:ko00620];E4.2.1.2A, fumA, fumB; fumarate hydratase, class I [EC:4.2.1.2]	275	34	55	13	2	125	3
K01677	Carbohydrate metabolism;00620 Pyruvate metabolism [PATH:ko00620];E4.2.1.2AA, fumA; fumarate hydratase subunit alpha [EC:4.2.1.2]	0	1	0	0	0	5	0
K01678	Carbohydrate metabolism;00620 Pyruvate metabolism [PATH:ko00620];E4.2.1.2AB, fumB; fumarate hydratase subunit beta [EC:4.2.1.2]	0	0	0	0	0	4	0
K01679	Carbohydrate metabolism;00620 Pyruvate metabolism [PATH:ko00620];E4.2.1.2B, fumC; fumarate hydratase, class II [EC:4.2.1.2]	276	25	19	11	0	122	5
K04020	Carbohydrate metabolism;00620 Pyruvate metabolism [PATH:ko00620];eutD; phosphotransacetylase	0	0	5	0	0	0	0
K04021	Carbohydrate metabolism;00620 Pyruvate metabolism [PATH:ko00620];eutE; aldehyde dehydrogenase	0	0	2	0	0	0	0
K00244	Carbohydrate metabolism;00620 Pyruvate metabolism [PATH:ko00620];frdA; fumarate reductase flavoprotein subunit [EC:1.3.5.4]	464	4	31	37	15	0	4
K00245	Carbohydrate metabolism;00620 Pyruvate metabolism [PATH:ko00620];frdB; fumarate reductase iron-sulfur subunit [EC:1.3.5.4]	7	1	15	14	5	0	3
K00246	Carbohydrate metabolism;00620 Pyruvate metabolism [PATH:ko00620];frdC; fumarate reductase subunit C	0	1	12	11	2	0	3
K00247	Carbohydrate metabolism;00620 Pyruvate metabolism [PATH:ko00620];frdD; fumarate reductase subunit D	0	0	8	3	4	0	3
K12972	Carbohydrate metabolism;00620 Pyruvate metabolism [PATH:ko00620];ghrA; glyoxylate/hydroxypyruvate reductase A [EC:1.1.1.79 1.1.1.81]	401	51	15	21	2	36	6
K01759	Carbohydrate metabolism;00620 Pyruvate metabolism [PATH:ko00620];GLO1, gloA; lactoylglutathione lyase [EC:4.4.1.5]	129	18	15	26	0	73	19
K05523	Carbohydrate metabolism;00620 Pyruvate metabolism [PATH:ko00620];hchA; molecular chaperone Hsp31 and glyoxalase 3 [EC:4.2.1.130]	94	5	13	0	0	13	3
K15024	Carbohydrate metabolism;00620 Pyruvate metabolism [PATH:ko00620];K15024; putative phosphotransacetylase [EC:2.3.1.8]	0	0	1	0	2	0	0
K00016	Carbohydrate metabolism;00620 Pyruvate metabolism [PATH:ko00620];LDH, ldh; L-lactate dehydrogenase [EC:1.1.1.27]	0	0	3	0	1	0	0
K03778	Carbohydrate metabolism;00620 Pyruvate metabolism [PATH:ko00620];ldhA; D-lactate dehydrogenase [EC:1.1.1.28]	175	17	12	13	3	21	5
K00102	Carbohydrate metabolism;00620 Pyruvate metabolism [PATH:ko00620];LDHD, dld; D-lactate dehydrogenase (cytochrome) [EC:1.1.2.4]	0	36	0	0	0	0	0
K01649	Carbohydrate metabolism;00620 Pyruvate metabolism [PATH:ko00620];leuA, IMS; 2-isopropylmalate synthase [EC:2.3.3.13]	587	75	46	21	6	145	23
K00101	Carbohydrate metabolism;00620 Pyruvate metabolism [PATH:ko00620];lldD; L-lactate dehydrogenase (cytochrome) [EC:1.1.2.3]	270	4	23	14	14	67	5
K00024	Carbohydrate metabolism;00620 Pyruvate metabolism [PATH:ko00620];mdh; malate dehydrogenase [EC:1.1.1.37]	206	23	13	13	5	0	5
K00027	Carbohydrate metabolism;00620 Pyruvate metabolism [PATH:ko00620];ME2, sfcA, maeA; malate dehydrogenase (oxaloacetate-decarboxylating) [EC:1.1.1.38]	321	4	28	20	7	12	7
K04073	Carbohydrate metabolism;00620 Pyruvate metabolism [PATH:ko00620];mhpF; acetaldehyde dehydrogenase [EC:1.2.1.10]	0	12	0	0	0	0	0
K00116	Carbohydrate metabolism;00620 Pyruvate metabolism [PATH:ko00620];mqo; malate dehydrogenase (quinone) [EC:1.1.5.4]	576	14	26	47	5	263	6
K02594	Carbohydrate metabolism;00620 Pyruvate metabolism [PATH:ko00620];nifV; homocitrate synthase NifV [EC:2.3.3.14]	4	1	2	0	0	0	0
K01571	Carbohydrate metabolism;00620 Pyruvate metabolism [PATH:ko00620];oadA; oxaloacetate decarboxylase, alpha subunit [EC:4.1.1.3]	0	1	2	0	1	0	0
K01572	Carbohydrate metabolism;00620 Pyruvate metabolism [PATH:ko00620];oadB; oxaloacetate decarboxylase, beta subunit [EC:4.1.1.3]	0	0	3	0	4	0	0
K01573	Carbohydrate metabolism;00620 Pyruvate metabolism [PATH:ko00620];oadG; oxaloacetate decarboxylase, gamma subunit [EC:4.1.1.3]	0	0	2	0	0	0	0
K01958	Carbohydrate metabolism;00620 Pyruvate metabolism [PATH:ko00620];PC, pyc; pyruvate carboxylase [EC:6.4.1.1]	0	42	0	0	0	0	0
K01026	Carbohydrate metabolism;00620 Pyruvate metabolism [PATH:ko00620];pct; propionate CoA-transferase [EC:2.8.3.1]	0	35	0	0	2	0	0
K00161	Carbohydrate metabolism;00620 Pyruvate metabolism [PATH:ko00620];PDHA, pdhA; pyruvate dehydrogenase E1 component alpha subunit [EC:1.2.4.1]	0	18	3	10	4	55	0
K00162	Carbohydrate metabolism;00620 Pyruvate metabolism [PATH:ko00620];PDHB, pdhB; pyruvate dehydrogenase E1 component beta subunit [EC:1.2.4.1]	0	17	8	8	0	40	0
K00873	Carbohydrate metabolism;00620 Pyruvate metabolism [PATH:ko00620];PK, pyk; pyruvate kinase [EC:2.7.1.40]	466	32	39	27	2	152	10
K03737	Carbohydrate metabolism;00620 Pyruvate metabolism [PATH:ko00620];por, nifJ; pyruvate-ferredoxin/flavodoxin oxidoreductase [EC:1.2.7.1 1.2.7.-]	10	0	31	1	5	0	8
K00156	Carbohydrate metabolism;00620 Pyruvate metabolism [PATH:ko00620];poxB; pyruvate dehydrogenase (quinone) [EC:1.2.5.1]	629	52	26	16	6	167	5
K01595	Carbohydrate metabolism;00620 Pyruvate metabolism [PATH:ko00620];ppc; phosphoenolpyruvate carboxylase [EC:4.1.1.31]	493	46	22	30	5	169	6
K01006	Carbohydrate metabolism;00620 Pyruvate metabolism [PATH:ko00620];ppdK; pyruvate, orthophosphate dikinase [EC:2.7.9.1]	0	3	0	0	0	0	0
K01007	Carbohydrate metabolism;00620 Pyruvate metabolism [PATH:ko00620];pps, ppsA; pyruvate, water dikinase [EC:2.7.9.2]	365	48	27	19	6	155	7
K13788	Carbohydrate metabolism;00620 Pyruvate metabolism [PATH:ko00620];pta; phosphate acetyltransferase [EC:2.3.1.8]	349	0	24	16	1	27	7
K01959	Carbohydrate metabolism;00620 Pyruvate metabolism [PATH:ko00620];pycA; pyruvate carboxylase subunit A [EC:6.4.1.1]	0	0	0	0	0	101	0
K01960	Carbohydrate metabolism;00620 Pyruvate metabolism [PATH:ko00620];pycB; pyruvate carboxylase subunit B [EC:6.4.1.1]	0	0	0	0	0	115	0
K01638	Carbohydrate metabolism;00630 Glyoxylate and dicarboxylate metabolism [PATH:ko00630];aceB, glcB; malate synthase [EC:2.3.3.9]	356	46	28	0	8	209	4
K01682	Carbohydrate metabolism;00630 Glyoxylate and dicarboxylate metabolism [PATH:ko00630];acnB; aconitate hydratase 2 / 2-methylisocitrate dehydratase [EC:4.2.1.3 4.2.1.99]	405	31	53	22	0	141	5
K01681	Carbohydrate metabolism;00630 Glyoxylate and dicarboxylate metabolism [PATH:ko00630];ACO, acnA; aconitate hydratase [EC:4.2.1.3]	540	111	44	10	6	202	6
K01432	Carbohydrate metabolism;00630 Glyoxylate and dicarboxylate metabolism [PATH:ko00630];AFMID; arylformamidase [EC:3.5.1.9]	0	0	0	0	0	1	2
K00830	Carbohydrate metabolism;00630 Glyoxylate and dicarboxylate metabolism [PATH:ko00630];AGXT; alanine-glyoxylate transaminase / serine-glyoxylate transaminase / serine-pyruvate transaminase [EC:2.6.1.44 2.6.1.45 2.6.1.51]	0	5	0	0	0	18	0
K07248	Carbohydrate metabolism;00630 Glyoxylate and dicarboxylate metabolism [PATH:ko00630];aldA; lactaldehyde dehydrogenase / glycolaldehyde dehydrogenase [EC:1.2.1.22 1.2.1.21]	146	9	9	15	1	28	0
K11263	Carbohydrate metabolism;00630 Glyoxylate and dicarboxylate metabolism [PATH:ko00630];bccA; acetyl-CoA/propionyl-CoA carboxylase, biotin carboxylase, biotin carboxyl carrier protein [EC:6.4.1.2 6.4.1.3 6.3.4.14]	0	6	0	0	0	40	0
K14446	Carbohydrate metabolism;00630 Glyoxylate and dicarboxylate metabolism [PATH:ko00630];ccr; crotonyl-CoA carboxylase/reductase [EC:1.3.1.85]	0	3	0	0	0	4	0
K17865	Carbohydrate metabolism;00630 Glyoxylate and dicarboxylate metabolism [PATH:ko00630];croR; 3-hydroxybutyryl-CoA dehydratase [EC:4.2.1.55]	0	4	1	0	0	0	0
K01647	Carbohydrate metabolism;00630 Glyoxylate and dicarboxylate metabolism [PATH:ko00630];CS, gltA; citrate synthase [EC:2.3.3.1]	229	64	13	18	4	83	6
K00382	Carbohydrate metabolism;00630 Glyoxylate and dicarboxylate metabolism [PATH:ko00630];DLD, lpd, pdhD; dihydrolipoamide dehydrogenase [EC:1.8.1.4]	228	108	22	11	10	316	12
K00284	Carbohydrate metabolism;00630 Glyoxylate and dicarboxylate metabolism [PATH:ko00630];E1.4.7.1; glutamate synthase (ferredoxin) [EC:1.4.7.1]	0	60	0	0	0	0	0
K00626	Carbohydrate metabolism;00630 Glyoxylate and dicarboxylate metabolism [PATH:ko00630];E2.3.1.9, atoB; acetyl-CoA C-acetyltransferase [EC:2.3.1.9]	18	199	27	0	15	331	10
K01455	Carbohydrate metabolism;00630 Glyoxylate and dicarboxylate metabolism [PATH:ko00630];E3.5.1.49; formamidase [EC:3.5.1.49]	0	5	0	0	0	22	0
K03418	Carbohydrate metabolism;00630 Glyoxylate and dicarboxylate metabolism [PATH:ko00630];E3.5.1.56; N,N-dimethylformamidase [EC:3.5.1.56]	0	1	0	4	0	0	0
K01637	Carbohydrate metabolism;00630 Glyoxylate and dicarboxylate metabolism [PATH:ko00630];E4.1.3.1, aceA; isocitrate lyase [EC:4.1.3.1]	244	41	17	0	3	106	4
K11942	Carbohydrate metabolism;00630 Glyoxylate and dicarboxylate metabolism [PATH:ko00630];E5.4.99.2; methylmalonyl-CoA mutase [EC:5.4.99.2]	0	8	0	0	0	0	0
K01848	Carbohydrate metabolism;00630 Glyoxylate and dicarboxylate metabolism [PATH:ko00630];E5.4.99.2A, mcmA1; methylmalonyl-CoA mutase, N-terminal domain [EC:5.4.99.2]	0	8	0	0	0	0	0
K01849	Carbohydrate metabolism;00630 Glyoxylate and dicarboxylate metabolism [PATH:ko00630];E5.4.99.2B, mcmA2; methylmalonyl-CoA mutase, C-terminal domain [EC:5.4.99.2]	0	1	0	0	0	0	0
K01625	Carbohydrate metabolism;00630 Glyoxylate and dicarboxylate metabolism [PATH:ko00630];eda; 2-dehydro-3-deoxyphosphogluconate aldolase / (4S)-4-hydroxy-2-oxoglutarate aldolase [EC:4.1.2.14 4.1.3.42]	117	17	11	14	1	51	7
K00122	Carbohydrate metabolism;00630 Glyoxylate and dicarboxylate metabolism [PATH:ko00630];FDH; formate dehydrogenase [EC:1.2.1.2]	0	8	0	0	0	2	0
K00123	Carbohydrate metabolism;00630 Glyoxylate and dicarboxylate metabolism [PATH:ko00630];fdoG, fdfH; formate dehydrogenase major subunit [EC:1.2.1.2]	636	84	106	20	25	230	10
K00124	Carbohydrate metabolism;00630 Glyoxylate and dicarboxylate metabolism [PATH:ko00630];fdoH; formate dehydrogenase iron-sulfur subunit	132	40	12	1	3	91	5
K00127	Carbohydrate metabolism;00630 Glyoxylate and dicarboxylate metabolism [PATH:ko00630];fdoI; formate dehydrogenase subunit gamma	87	30	12	0	5	85	3
K00126	Carbohydrate metabolism;00630 Glyoxylate and dicarboxylate metabolism [PATH:ko00630];fdsD; formate dehydrogenase subunit delta [EC:1.2.1.2]	0	8	0	0	0	0	0
K00048	Carbohydrate metabolism;00630 Glyoxylate and dicarboxylate metabolism [PATH:ko00630];fucO; lactaldehyde reductase [EC:1.1.1.77]	104	0	1	15	0	0	0
K00042	Carbohydrate metabolism;00630 Glyoxylate and dicarboxylate metabolism [PATH:ko00630];garR, glxR; 2-hydroxy-3-oxopropionate reductase [EC:1.1.1.60]	190	41	16	7	5	25	2
K01608	Carbohydrate metabolism;00630 Glyoxylate and dicarboxylate metabolism [PATH:ko00630];gcl; tartronate-semialdehyde synthase [EC:4.1.1.47]	0	18	0	0	0	19	2
K02437	Carbohydrate metabolism;00630 Glyoxylate and dicarboxylate metabolism [PATH:ko00630];gcvH, GCSH; glycine cleavage system H protein	121	21	16	12	5	104	3
K00282	Carbohydrate metabolism;00630 Glyoxylate and dicarboxylate metabolism [PATH:ko00630];gcvPA; glycine dehydrogenase subunit 1 [EC:1.4.4.2]	0	0	0	0	0	9	0
K00283	Carbohydrate metabolism;00630 Glyoxylate and dicarboxylate metabolism [PATH:ko00630];gcvPB; glycine dehydrogenase subunit 2 [EC:1.4.4.2]	0	0	0	0	0	11	0
K00605	Carbohydrate metabolism;00630 Glyoxylate and dicarboxylate metabolism [PATH:ko00630];gcvT, AMT; aminomethyltransferase [EC:2.1.2.10]	212	23	10	17	4	147	8
K12972	Carbohydrate metabolism;00630 Glyoxylate and dicarboxylate metabolism [PATH:ko00630];ghrA; glyoxylate/hydroxypyruvate reductase A [EC:1.1.1.79 1.1.1.81]	401	51	15	21	2	36	6
K00104	Carbohydrate metabolism;00630 Glyoxylate and dicarboxylate metabolism [PATH:ko00630];glcD; glycolate oxidase [EC:1.1.3.15]	0	48	0	0	0	132	0
K11472	Carbohydrate metabolism;00630 Glyoxylate and dicarboxylate metabolism [PATH:ko00630];glcE; glycolate oxidase FAD binding subunit	0	36	0	0	0	79	0
K11473	Carbohydrate metabolism;00630 Glyoxylate and dicarboxylate metabolism [PATH:ko00630];glcF; glycolate oxidase iron-sulfur subunit	0	41	0	0	0	79	0
K00281	Carbohydrate metabolism;00630 Glyoxylate and dicarboxylate metabolism [PATH:ko00630];GLDC, gcvP; glycine dehydrogenase [EC:1.4.4.2]	523	68	36	24	5	225	8
K19268	Carbohydrate metabolism;00630 Glyoxylate and dicarboxylate metabolism [PATH:ko00630];glmE, mutE, mamB; methylaspartate mutase epsilon subunit [EC:5.4.99.1]	0	1	4	0	0	0	0
K01846	Carbohydrate metabolism;00630 Glyoxylate and dicarboxylate metabolism [PATH:ko00630];glmS, mutS, mamA; methylaspartate mutase sigma subunit [EC:5.4.99.1]	0	0	3	0	0	0	0
K01915	Carbohydrate metabolism;00630 Glyoxylate and dicarboxylate metabolism [PATH:ko00630];glnA, GLUL; glutamine synthetase [EC:6.3.1.2]	248	91	14	22	9	456	13
K00865	Carbohydrate metabolism;00630 Glyoxylate and dicarboxylate metabolism [PATH:ko00630];glxK, garK; glycerate 2-kinase [EC:2.7.1.165]	239	22	32	9	13	80	6
K00600	Carbohydrate metabolism;00630 Glyoxylate and dicarboxylate metabolism [PATH:ko00630];glyA, SHMT; glycine hydroxymethyltransferase [EC:2.1.2.1]	323	89	8	36	5	224	21
K01091	Carbohydrate metabolism;00630 Glyoxylate and dicarboxylate metabolism [PATH:ko00630];gph; phosphoglycolate phosphatase [EC:3.1.3.18]	172	65	19	21	2	279	4
K00015	Carbohydrate metabolism;00630 Glyoxylate and dicarboxylate metabolism [PATH:ko00630];gyaR; glyoxylate reductase [EC:1.1.1.26]	0	23	0	0	0	30	3
K15919	Carbohydrate metabolism;00630 Glyoxylate and dicarboxylate metabolism [PATH:ko00630];HPR2; hydroxypyruvate reductase 2	0	0	0	0	0	1	0
K00018	Carbohydrate metabolism;00630 Glyoxylate and dicarboxylate metabolism [PATH:ko00630];hprA; glycerate dehydrogenase [EC:1.1.1.29]	199	13	4	0	1	96	0
K01458	Carbohydrate metabolism;00630 Glyoxylate and dicarboxylate metabolism [PATH:ko00630];hutG; N-formylglutamate deformylase [EC:3.5.1.68]	0	22	0	0	0	0	0
K01816	Carbohydrate metabolism;00630 Glyoxylate and dicarboxylate metabolism [PATH:ko00630];hyi, gip; hydroxypyruvate isomerase [EC:5.3.1.22]	264	24	0	2	3	79	9
K03781	Carbohydrate metabolism;00630 Glyoxylate and dicarboxylate metabolism [PATH:ko00630];katE, CAT, catB, srpA; catalase [EC:1.11.1.6]	533	92	40	31	6	337	4
K07130	Carbohydrate metabolism;00630 Glyoxylate and dicarboxylate metabolism [PATH:ko00630];kynB; arylformamidase [EC:3.5.1.9]	0	14	0	0	0	0	0
K04835	Carbohydrate metabolism;00630 Glyoxylate and dicarboxylate metabolism [PATH:ko00630];mal; methylaspartate ammonia-lyase [EC:4.3.1.2]	0	0	4	0	0	0	0
K05606	Carbohydrate metabolism;00630 Glyoxylate and dicarboxylate metabolism [PATH:ko00630];MCEE, epi; methylmalonyl-CoA/ethylmalonyl-CoA epimerase [EC:5.1.99.1]	38	0	0	0	0	0	0
K00024	Carbohydrate metabolism;00630 Glyoxylate and dicarboxylate metabolism [PATH:ko00630];mdh; malate dehydrogenase [EC:1.1.1.37]	206	23	13	13	5	0	5
K01847	Carbohydrate metabolism;00630 Glyoxylate and dicarboxylate metabolism [PATH:ko00630];MUT; methylmalonyl-CoA mutase [EC:5.4.99.2]	0	7	1	0	0	0	0
K01577	Carbohydrate metabolism;00630 Glyoxylate and dicarboxylate metabolism [PATH:ko00630];oxc; oxalyl-CoA decarboxylase [EC:4.1.1.8]	0	7	0	0	0	0	0
K01569	Carbohydrate metabolism;00630 Glyoxylate and dicarboxylate metabolism [PATH:ko00630];oxdD; oxalate decarboxylase [EC:4.1.1.2]	176	23	2	14	0	0	5
K01966	Carbohydrate metabolism;00630 Glyoxylate and dicarboxylate metabolism [PATH:ko00630];PCCB, pccB; propionyl-CoA carboxylase beta chain [EC:6.4.1.3]	0	1	0	0	0	0	0
K00023	Carbohydrate metabolism;00630 Glyoxylate and dicarboxylate metabolism [PATH:ko00630];phbB; acetoacetyl-CoA reductase [EC:1.1.1.36]	20	27	1	0	2	14	0
K01433	Carbohydrate metabolism;00630 Glyoxylate and dicarboxylate metabolism [PATH:ko00630];purU; formyltetrahydrofolate deformylase [EC:3.5.1.10]	264	40	12	28	0	155	5
K01601	Carbohydrate metabolism;00630 Glyoxylate and dicarboxylate metabolism [PATH:ko00630];rbcL; ribulose-bisphosphate carboxylase large chain [EC:4.1.1.39]	0	7	0	0	0	1	0
K01602	Carbohydrate metabolism;00630 Glyoxylate and dicarboxylate metabolism [PATH:ko00630];rbcS; ribulose-bisphosphate carboxylase small chain [EC:4.1.1.39]	0	1	0	0	0	0	0
K03779	Carbohydrate metabolism;00630 Glyoxylate and dicarboxylate metabolism [PATH:ko00630];ttdA; L(+)-tartrate dehydratase alpha subunit [EC:4.2.1.32]	2	0	0	0	1	0	0
K03780	Carbohydrate metabolism;00630 Glyoxylate and dicarboxylate metabolism [PATH:ko00630];ttdB; L(+)-tartrate dehydratase beta subunit [EC:4.2.1.32]	2	2	1	0	0	0	0
K07246	Carbohydrate metabolism;00630 Glyoxylate and dicarboxylate metabolism [PATH:ko00630];ttuC, dmlA; tartrate dehydrogenase/decarboxylase / D-malate dehydrogenase [EC:1.1.1.93 4.1.1.73 1.1.1.83]	283	45	2	11	0	100	3
K00050	Carbohydrate metabolism;00630 Glyoxylate and dicarboxylate metabolism [PATH:ko00630];ttuD; hydroxypyruvate reductase [EC:1.1.1.81]	43	0	0	1	1	0	6
K00249	Carbohydrate metabolism;00640 Propanoate metabolism [PATH:ko00640];ACADM, acd; acyl-CoA dehydrogenase [EC:1.3.8.7]	16	112	0	0	0	52	0
K01962	Carbohydrate metabolism;00640 Propanoate metabolism [PATH:ko00640];accA; acetyl-CoA carboxylase carboxyl transferase subunit alpha [EC:6.4.1.2]	171	12	11	16	5	67	4
K02160	Carbohydrate metabolism;00640 Propanoate metabolism [PATH:ko00640];accB, bccP; acetyl-CoA carboxylase biotin carboxyl carrier protein	101	14	5	8	22	39	4
K01961	Carbohydrate metabolism;00640 Propanoate metabolism [PATH:ko00640];accC; acetyl-CoA carboxylase, biotin carboxylase subunit [EC:6.4.1.2 6.3.4.14]	194	24	11	39	5	133	5
K01963	Carbohydrate metabolism;00640 Propanoate metabolism [PATH:ko00640];accD; acetyl-CoA carboxylase carboxyl transferase subunit beta [EC:6.4.1.2]	148	16	10	11	1	44	5
K00925	Carbohydrate metabolism;00640 Propanoate metabolism [PATH:ko00640];ackA; acetate kinase [EC:2.7.2.1]	250	18	17	11	1	10	4
K01682	Carbohydrate metabolism;00640 Propanoate metabolism [PATH:ko00640];acnB; aconitate hydratase 2 / 2-methylisocitrate dehydratase [EC:4.2.1.3 4.2.1.99]	405	31	53	22	0	141	5
K01895	Carbohydrate metabolism;00640 Propanoate metabolism [PATH:ko00640];ACSS, acs; acetyl-CoA synthetase [EC:6.2.1.1]	337	105	29	28	4	348	6
K19745	Carbohydrate metabolism;00640 Propanoate metabolism [PATH:ko00640];acuI; acrylyl-CoA reductase (NADPH) [EC:1.3.1.-]	244	33	16	10	2	18	5
K01574	Carbohydrate metabolism;00640 Propanoate metabolism [PATH:ko00640];adc; acetoacetate decarboxylase [EC:4.1.1.4]	0	10	0	0	0	0	0
K18382	Carbohydrate metabolism;00640 Propanoate metabolism [PATH:ko00640];adh1; NAD+-dependent secondary alcohol dehydrogenase Adh1 [EC:1.1.1.-]	0	2	0	0	0	0	0
K18369	Carbohydrate metabolism;00640 Propanoate metabolism [PATH:ko00640];adh2; alcohol dehydrogenase [EC:1.1.1.-]	0	4	0	0	0	0	0
K01035	Carbohydrate metabolism;00640 Propanoate metabolism [PATH:ko00640];atoA; acetate CoA/acetoacetate CoA-transferase beta subunit [EC:2.8.3.8 2.8.3.9]	1	0	0	0	0	0	0
K01034	Carbohydrate metabolism;00640 Propanoate metabolism [PATH:ko00640];atoD; acetate CoA/acetoacetate CoA-transferase alpha subunit [EC:2.8.3.8 2.8.3.9]	1	2	0	0	0	0	0
K11263	Carbohydrate metabolism;00640 Propanoate metabolism [PATH:ko00640];bccA; acetyl-CoA/propionyl-CoA carboxylase, biotin carboxylase, biotin carboxyl carrier protein [EC:6.4.1.2 6.4.1.3 6.3.4.14]	0	6	0	0	0	40	0
K00166	Carbohydrate metabolism;00640 Propanoate metabolism [PATH:ko00640];BCKDHA, bkdA1; 2-oxoisovalerate dehydrogenase E1 component alpha subunit [EC:1.2.4.4]	0	16	0	0	0	58	0
K00167	Carbohydrate metabolism;00640 Propanoate metabolism [PATH:ko00640];BCKDHB, bkdA2; 2-oxoisovalerate dehydrogenase E1 component beta subunit [EC:1.2.4.4]	0	18	0	0	0	62	0
K11381	Carbohydrate metabolism;00640 Propanoate metabolism [PATH:ko00640];bkdA; 2-oxoisovalerate dehydrogenase E1 component [EC:1.2.4.4]	0	0	0	0	0	7	0
K09699	Carbohydrate metabolism;00640 Propanoate metabolism [PATH:ko00640];DBT, bkdB; 2-oxoisovalerate dehydrogenase E2 component (dihydrolipoyl transacylase) [EC:2.3.1.168]	0	21	0	0	0	72	0
K00382	Carbohydrate metabolism;00640 Propanoate metabolism [PATH:ko00640];DLD, lpd, pdhD; dihydrolipoamide dehydrogenase [EC:1.8.1.4]	228	108	22	11	10	316	12
K00656	Carbohydrate metabolism;00640 Propanoate metabolism [PATH:ko00640];E2.3.1.54, pflD; formate C-acetyltransferase [EC:2.3.1.54]	300	0	90	11	18	0	12
K00625	Carbohydrate metabolism;00640 Propanoate metabolism [PATH:ko00640];E2.3.1.8, pta; phosphate acetyltransferase [EC:2.3.1.8]	0	13	0	0	0	0	0
K00626	Carbohydrate metabolism;00640 Propanoate metabolism [PATH:ko00640];E2.3.1.9, atoB; acetyl-CoA C-acetyltransferase [EC:2.3.1.9]	18	199	27	0	15	331	10
K00822	Carbohydrate metabolism;00640 Propanoate metabolism [PATH:ko00640];E2.6.1.18; beta-alanine--pyruvate transaminase [EC:2.6.1.18]	73	28	0	3	0	95	3
K11942	Carbohydrate metabolism;00640 Propanoate metabolism [PATH:ko00640];E5.4.99.2; methylmalonyl-CoA mutase [EC:5.4.99.2]	0	8	0	0	0	0	0
K01848	Carbohydrate metabolism;00640 Propanoate metabolism [PATH:ko00640];E5.4.99.2A, mcmA1; methylmalonyl-CoA mutase, N-terminal domain [EC:5.4.99.2]	0	8	0	0	0	0	0
K01849	Carbohydrate metabolism;00640 Propanoate metabolism [PATH:ko00640];E5.4.99.2B, mcmA2; methylmalonyl-CoA mutase, C-terminal domain [EC:5.4.99.2]	0	1	0	0	0	0	0
K01825	Carbohydrate metabolism;00640 Propanoate metabolism [PATH:ko00640];fadB; 3-hydroxyacyl-CoA dehydrogenase / enoyl-CoA hydratase / 3-hydroxybutyryl-CoA epimerase / enoyl-CoA isomerase [EC:1.1.1.35 4.2.1.17 5.1.2.3 5.3.3.8]	422	2	30	21	5	138	8
K01782	Carbohydrate metabolism;00640 Propanoate metabolism [PATH:ko00640];fadJ; 3-hydroxyacyl-CoA dehydrogenase / enoyl-CoA hydratase / 3-hydroxybutyryl-CoA epimerase [EC:1.1.1.35 4.2.1.17 5.1.2.3]	417	0	24	16	5	35	8
K00048	Carbohydrate metabolism;00640 Propanoate metabolism [PATH:ko00640];fucO; lactaldehyde reductase [EC:1.1.1.77]	104	0	1	15	0	0	0
K07250	Carbohydrate metabolism;00640 Propanoate metabolism [PATH:ko00640];gabT; 4-aminobutyrate aminotransferase / (S)-3-amino-2-methylpropionate transaminase [EC:2.6.1.19 2.6.1.22]	282	1	3	16	0	41	1
K00005	Carbohydrate metabolism;00640 Propanoate metabolism [PATH:ko00640];gldA; glycerol dehydrogenase [EC:1.1.1.6]	422	1	14	12	2	0	5
K15024	Carbohydrate metabolism;00640 Propanoate metabolism [PATH:ko00640];K15024; putative phosphotransacetylase [EC:2.3.1.8]	0	0	1	0	2	0	0
K00016	Carbohydrate metabolism;00640 Propanoate metabolism [PATH:ko00640];LDH, ldh; L-lactate dehydrogenase [EC:1.1.1.27]	0	0	3	0	1	0	0
K05606	Carbohydrate metabolism;00640 Propanoate metabolism [PATH:ko00640];MCEE, epi; methylmalonyl-CoA/ethylmalonyl-CoA epimerase [EC:5.1.99.1]	38	0	0	0	0	0	0
K01734	Carbohydrate metabolism;00640 Propanoate metabolism [PATH:ko00640];mgsA; methylglyoxal synthase [EC:4.2.3.3]	127	13	11	6	1	0	4
K11264	Carbohydrate metabolism;00640 Propanoate metabolism [PATH:ko00640];mmcD; methylmalonyl-CoA decarboxylase [EC:4.1.1.41]	0	6	0	0	0	0	0
K00140	Carbohydrate metabolism;00640 Propanoate metabolism [PATH:ko00640];mmsA, iolA, ALDH6A1; malonate-semialdehyde dehydrogenase (acetylating) / methylmalonate-semialdehyde dehydrogenase [EC:1.2.1.18 1.2.1.27]	324	102	14	31	1	318	19
K01847	Carbohydrate metabolism;00640 Propanoate metabolism [PATH:ko00640];MUT; methylmalonyl-CoA mutase [EC:5.4.99.2]	0	7	1	0	0	0	0
K01692	Carbohydrate metabolism;00640 Propanoate metabolism [PATH:ko00640];paaF, echA; enoyl-CoA hydratase [EC:4.2.1.17]	4	60	11	0	0	83	6
K01966	Carbohydrate metabolism;00640 Propanoate metabolism [PATH:ko00640];PCCB, pccB; propionyl-CoA carboxylase beta chain [EC:6.4.1.3]	0	1	0	0	0	0	0
K01026	Carbohydrate metabolism;00640 Propanoate metabolism [PATH:ko00640];pct; propionate CoA-transferase [EC:2.8.3.1]	0	35	0	0	2	0	0
K18223	Carbohydrate metabolism;00640 Propanoate metabolism [PATH:ko00640];prmA; propane 2-monooxygenase large subunit [EC:1.14.13.227]	0	1	0	0	0	0	0
K18224	Carbohydrate metabolism;00640 Propanoate metabolism [PATH:ko00640];prmC; propane 2-monooxygenase small subunit [EC:1.14.13.227]	0	1	0	0	0	0	0
K03417	Carbohydrate metabolism;00640 Propanoate metabolism [PATH:ko00640];prpB; methylisocitrate lyase [EC:4.1.3.30]	0	19	0	0	0	86	5
K01659	Carbohydrate metabolism;00640 Propanoate metabolism [PATH:ko00640];prpC; 2-methylcitrate synthase [EC:2.3.3.5]	0	18	0	0	0	96	3
K01720	Carbohydrate metabolism;00640 Propanoate metabolism [PATH:ko00640];prpD; 2-methylcitrate dehydratase [EC:4.2.1.79]	0	28	0	0	0	110	13
K01908	Carbohydrate metabolism;00640 Propanoate metabolism [PATH:ko00640];prpE; propionyl-CoA synthetase [EC:6.2.1.17]	0	1	0	2	0	15	0
K09788	Carbohydrate metabolism;00640 Propanoate metabolism [PATH:ko00640];prpF; 2-methylaconitate isomerase [EC:5.2.1.-]	14	21	9	0	0	102	0
K13788	Carbohydrate metabolism;00640 Propanoate metabolism [PATH:ko00640];pta; phosphate acetyltransferase [EC:2.3.1.8]	349	0	24	16	1	27	7
K00823	Carbohydrate metabolism;00640 Propanoate metabolism [PATH:ko00640];puuE; 4-aminobutyrate aminotransferase [EC:2.6.1.19]	253	20	20	7	3	3	3
K01903	Carbohydrate metabolism;00640 Propanoate metabolism [PATH:ko00640];sucC; succinyl-CoA synthetase beta subunit [EC:6.2.1.5]	155	33	12	17	3	58	4
K01902	Carbohydrate metabolism;00640 Propanoate metabolism [PATH:ko00640];sucD; succinyl-CoA synthetase alpha subunit [EC:6.2.1.5]	163	29	10	10	2	56	3
K00932	Carbohydrate metabolism;00640 Propanoate metabolism [PATH:ko00640];tdcD; propionate kinase [EC:2.7.2.15]	0	0	9	0	0	0	0
K08325	Carbohydrate metabolism;00640 Propanoate metabolism [PATH:ko00640];yqhD; NADP-dependent alcohol dehydrogenase [EC:1.1.-.-]	0	5	17	2	7	0	3
K01907	Carbohydrate metabolism;00650 Butanoate metabolism [PATH:ko00650];AACS, acsA; acetoacetyl-CoA synthetase [EC:6.2.1.16]	0	6	0	0	0	2	0
K18118	Carbohydrate metabolism;00650 Butanoate metabolism [PATH:ko00650];aarC, cat1; succinyl-CoA:acetate CoA-transferase [EC:2.8.3.18]	0	21	0	0	0	106	0
K00248	Carbohydrate metabolism;00650 Butanoate metabolism [PATH:ko00650];ACADS, bcd; butyryl-CoA dehydrogenase [EC:1.3.8.1]	0	20	0	0	0	16	0
K04072	Carbohydrate metabolism;00650 Butanoate metabolism [PATH:ko00650];adhE; acetaldehyde dehydrogenase / alcohol dehydrogenase [EC:1.2.1.10 1.1.1.1]	398	0	26	8	4	0	8
K01575	Carbohydrate metabolism;00650 Butanoate metabolism [PATH:ko00650];alsD, budA, aldC; acetolactate decarboxylase [EC:4.1.1.5]	157	0	11	12	2	0	6
K01035	Carbohydrate metabolism;00650 Butanoate metabolism [PATH:ko00650];atoA; acetate CoA/acetoacetate CoA-transferase beta subunit [EC:2.8.3.8 2.8.3.9]	1	0	0	0	0	0	0
K01034	Carbohydrate metabolism;00650 Butanoate metabolism [PATH:ko00650];atoD; acetate CoA/acetoacetate CoA-transferase alpha subunit [EC:2.8.3.8 2.8.3.9]	1	2	0	0	0	0	0
K00004	Carbohydrate metabolism;00650 Butanoate metabolism [PATH:ko00650];BDH, butB; (R,R)-butanediol dehydrogenase / meso-butanediol dehydrogenase / diacetyl reductase [EC:1.1.1.4 1.1.1.- 1.1.1.303]	6	37	0	2	0	48	0
K00100	Carbohydrate metabolism;00650 Butanoate metabolism [PATH:ko00650];bdhAB; butanol dehydrogenase [EC:1.1.1.-]	10	18	0	3	1	152	0
K18366	Carbohydrate metabolism;00650 Butanoate metabolism [PATH:ko00650];bphJ, xylQ, nahO, tesF; acetaldehyde/propanal dehydrogenase [EC:1.2.1.10 1.2.1.87]	0	3	0	0	0	0	0
K18009	Carbohydrate metabolism;00650 Butanoate metabolism [PATH:ko00650];budC; meso-butanediol dehydrogenase / (S,S)-butanediol dehydrogenase / diacetyl reductase [EC:1.1.1.- 1.1.1.76 1.1.1.304]	157	3	0	10	0	20	3
K00929	Carbohydrate metabolism;00650 Butanoate metabolism [PATH:ko00650];buk; butyrate kinase [EC:2.7.2.7]	0	0	1	0	0	0	0
K03366	Carbohydrate metabolism;00650 Butanoate metabolism [PATH:ko00650];butA, budC; meso-butanediol dehydrogenase / (S,S)-butanediol dehydrogenase / diacetyl reductase [EC:1.1.1.- 1.1.1.76 1.1.1.304]	151	2	12	8	9	26	2
K18122	Carbohydrate metabolism;00650 Butanoate metabolism [PATH:ko00650];cat2, abfT; 4-hydroxybutyrate CoA-transferase [EC:2.8.3.-]	0	0	0	0	0	1	0
K17865	Carbohydrate metabolism;00650 Butanoate metabolism [PATH:ko00650];croR; 3-hydroxybutyryl-CoA dehydratase [EC:4.2.1.55]	0	4	1	0	0	0	0
K01715	Carbohydrate metabolism;00650 Butanoate metabolism [PATH:ko00650];crt; enoyl-CoA hydratase [EC:4.2.1.17]	0	6	0	0	0	2	0
K14268	Carbohydrate metabolism;00650 Butanoate metabolism [PATH:ko00650];davT, gabT; 5-aminovalerate/4-aminobutyrate aminotransferase [EC:2.6.1.48 2.6.1.19]	0	0	0	0	0	105	0
K00019	Carbohydrate metabolism;00650 Butanoate metabolism [PATH:ko00650];E1.1.1.30, bdh; 3-hydroxybutyrate dehydrogenase [EC:1.1.1.30]	4	42	9	0	0	87	3
K01652	Carbohydrate metabolism;00650 Butanoate metabolism [PATH:ko00650];E2.2.1.6L, ilvB, ilvG, ilvI; acetolactate synthase I/II/III large subunit [EC:2.2.1.6]	938	152	87	51	21	438	24
K01653	Carbohydrate metabolism;00650 Butanoate metabolism [PATH:ko00650];E2.2.1.6S, ilvH, ilvN; acetolactate synthase I/III small subunit [EC:2.2.1.6]	125	15	23	9	5	46	6
K00656	Carbohydrate metabolism;00650 Butanoate metabolism [PATH:ko00650];E2.3.1.54, pflD; formate C-acetyltransferase [EC:2.3.1.54]	300	0	90	11	18	0	12
K00626	Carbohydrate metabolism;00650 Butanoate metabolism [PATH:ko00650];E2.3.1.9, atoB; acetyl-CoA C-acetyltransferase [EC:2.3.1.9]	18	199	27	0	15	331	10
K01028	Carbohydrate metabolism;00650 Butanoate metabolism [PATH:ko00650];E2.8.3.5A, scoA; 3-oxoacid CoA-transferase subunit A [EC:2.8.3.5]	3	17	6	0	0	50	3
K01029	Carbohydrate metabolism;00650 Butanoate metabolism [PATH:ko00650];E2.8.3.5B, scoB; 3-oxoacid CoA-transferase subunit B [EC:2.8.3.5]	4	16	7	0	0	54	3
K07518	Carbohydrate metabolism;00650 Butanoate metabolism [PATH:ko00650];E3.1.1.22; hydroxybutyrate-dimer hydrolase [EC:3.1.1.22]	0	27	0	0	0	0	0
K01580	Carbohydrate metabolism;00650 Butanoate metabolism [PATH:ko00650];E4.1.1.15, gadB, gadA, GAD; glutamate decarboxylase [EC:4.1.1.15]	0	1	0	0	0	0	0
K01640	Carbohydrate metabolism;00650 Butanoate metabolism [PATH:ko00650];E4.1.3.4, HMGCL, hmgL; hydroxymethylglutaryl-CoA lyase [EC:4.1.3.4]	0	50	3	0	2	167	0
K00209	Carbohydrate metabolism;00650 Butanoate metabolism [PATH:ko00650];fabV, ter; enoyl-[acyl-carrier protein] reductase / trans-2-enoyl-CoA reductase (NAD+) [EC:1.3.1.9 1.3.1.44]	2	20	1	11	0	3	3
K01825	Carbohydrate metabolism;00650 Butanoate metabolism [PATH:ko00650];fadB; 3-hydroxyacyl-CoA dehydrogenase / enoyl-CoA hydratase / 3-hydroxybutyryl-CoA epimerase / enoyl-CoA isomerase [EC:1.1.1.35 4.2.1.17 5.1.2.3 5.3.3.8]	422	2	30	21	5	138	8
K01782	Carbohydrate metabolism;00650 Butanoate metabolism [PATH:ko00650];fadJ; 3-hydroxyacyl-CoA dehydrogenase / enoyl-CoA hydratase / 3-hydroxybutyryl-CoA epimerase [EC:1.1.1.35 4.2.1.17 5.1.2.3]	417	0	24	16	5	35	8
K07516	Carbohydrate metabolism;00650 Butanoate metabolism [PATH:ko00650];fadN; 3-hydroxyacyl-CoA dehydrogenase [EC:1.1.1.35]	0	121	0	0	0	12	0
K00244	Carbohydrate metabolism;00650 Butanoate metabolism [PATH:ko00650];frdA; fumarate reductase flavoprotein subunit [EC:1.3.5.4]	464	4	31	37	15	0	4
K00245	Carbohydrate metabolism;00650 Butanoate metabolism [PATH:ko00650];frdB; fumarate reductase iron-sulfur subunit [EC:1.3.5.4]	7	1	15	14	5	0	3
K00246	Carbohydrate metabolism;00650 Butanoate metabolism [PATH:ko00650];frdC; fumarate reductase subunit C	0	1	12	11	2	0	3
K00247	Carbohydrate metabolism;00650 Butanoate metabolism [PATH:ko00650];frdD; fumarate reductase subunit D	0	0	8	3	4	0	3
K00135	Carbohydrate metabolism;00650 Butanoate metabolism [PATH:ko00650];gabD; succinate-semialdehyde dehydrogenase / glutarate-semialdehyde dehydrogenase [EC:1.2.1.16 1.2.1.79 1.2.1.20]	926	143	64	40	0	248	24
K07250	Carbohydrate metabolism;00650 Butanoate metabolism [PATH:ko00650];gabT; 4-aminobutyrate aminotransferase / (S)-3-amino-2-methylpropionate transaminase [EC:2.6.1.19 2.6.1.22]	282	1	3	16	0	41	1
K00043	Carbohydrate metabolism;00650 Butanoate metabolism [PATH:ko00650];gbd; 4-hydroxybutyrate dehydrogenase [EC:1.1.1.61]	0	1	0	0	0	0	0
K01615	Carbohydrate metabolism;00650 Butanoate metabolism [PATH:ko00650];gcdA; glutaconyl-CoA decarboxylase [EC:4.1.1.70]	1	0	0	0	0	0	0
K01039	Carbohydrate metabolism;00650 Butanoate metabolism [PATH:ko00650];gctA; glutaconate CoA-transferase, subunit A [EC:2.8.3.12]	0	5	0	0	0	63	0
K01040	Carbohydrate metabolism;00650 Butanoate metabolism [PATH:ko00650];gctB; glutaconate CoA-transferase, subunit B [EC:2.8.3.12]	0	5	0	0	0	54	0
K11258	Carbohydrate metabolism;00650 Butanoate metabolism [PATH:ko00650];ilvM; acetolactate synthase II small subunit [EC:2.2.1.6]	84	0	12	14	0	0	5
K04073	Carbohydrate metabolism;00650 Butanoate metabolism [PATH:ko00650];mhpF; acetaldehyde dehydrogenase [EC:1.2.1.10]	0	12	0	0	0	0	0
K01799	Carbohydrate metabolism;00650 Butanoate metabolism [PATH:ko00650];nicE, maiA; maleate isomerase [EC:5.2.1.1]	12	31	0	0	0	16	4
K01692	Carbohydrate metabolism;00650 Butanoate metabolism [PATH:ko00650];paaF, echA; enoyl-CoA hydratase [EC:4.2.1.17]	4	60	11	0	0	83	6
K00074	Carbohydrate metabolism;00650 Butanoate metabolism [PATH:ko00650];paaH, hbd, fadB, mmgB; 3-hydroxybutyryl-CoA dehydrogenase [EC:1.1.1.157]	1	47	14	0	19	83	13
K05973	Carbohydrate metabolism;00650 Butanoate metabolism [PATH:ko00650];phaZ; poly(3-hydroxybutyrate) depolymerase [EC:3.1.1.75]	0	20	0	0	0	0	0
K00023	Carbohydrate metabolism;00650 Butanoate metabolism [PATH:ko00650];phbB; acetoacetyl-CoA reductase [EC:1.1.1.36]	20	27	1	0	2	14	0
K03821	Carbohydrate metabolism;00650 Butanoate metabolism [PATH:ko00650];phbC, phaC; polyhydroxyalkanoate synthase [EC:2.3.1.-]	0	26	0	0	0	40	0
K16871	Carbohydrate metabolism;00650 Butanoate metabolism [PATH:ko00650];POP2; 4-aminobutyrate---pyruvate transaminase [EC:2.6.1.96]	0	3	0	0	0	4	0
K03737	Carbohydrate metabolism;00650 Butanoate metabolism [PATH:ko00650];por, nifJ; pyruvate-ferredoxin/flavodoxin oxidoreductase [EC:1.2.7.1 1.2.7.-]	10	0	31	1	5	0	8
K00823	Carbohydrate metabolism;00650 Butanoate metabolism [PATH:ko00650];puuE; 4-aminobutyrate aminotransferase [EC:2.6.1.19]	253	20	20	7	3	3	3
K08324	Carbohydrate metabolism;00650 Butanoate metabolism [PATH:ko00650];sad; succinate-semialdehyde dehydrogenase [EC:1.2.1.16 1.2.1.24]	274	16	20	21	1	29	0
K00239	Carbohydrate metabolism;00650 Butanoate metabolism [PATH:ko00650];sdhA, frdA; succinate dehydrogenase / fumarate reductase, flavoprotein subunit [EC:1.3.5.1 1.3.5.4]	278	42	13	26	1	121	4
K00240	Carbohydrate metabolism;00650 Butanoate metabolism [PATH:ko00650];sdhB, frdB; succinate dehydrogenase / fumarate reductase, iron-sulfur subunit [EC:1.3.5.1 1.3.5.4]	138	19	9	17	2	54	4
K00241	Carbohydrate metabolism;00650 Butanoate metabolism [PATH:ko00650];sdhC, frdC; succinate dehydrogenase / fumarate reductase, cytochrome b subunit	75	6	8	8	3	26	4
K00242	Carbohydrate metabolism;00650 Butanoate metabolism [PATH:ko00650];sdhD, frdD; succinate dehydrogenase / fumarate reductase, membrane anchor subunit	87	10	10	4	1	25	4
K07246	Carbohydrate metabolism;00650 Butanoate metabolism [PATH:ko00650];ttuC, dmlA; tartrate dehydrogenase/decarboxylase / D-malate dehydrogenase [EC:1.1.1.93 4.1.1.73 1.1.1.83]	283	45	2	11	0	100	3
K08318	Carbohydrate metabolism;00650 Butanoate metabolism [PATH:ko00650];yihU; 4-hydroxybutyrate dehydrogenase / sulfolactaldehyde 3-reductase [EC:1.1.1.61 1.1.1.373]	74	0	2	0	0	11	0
K01575	Carbohydrate metabolism;00660 C5-Branched dibasic acid metabolism [PATH:ko00660];alsD, budA, aldC; acetolactate decarboxylase [EC:4.1.1.5]	157	0	11	12	2	0	6
K01652	Carbohydrate metabolism;00660 C5-Branched dibasic acid metabolism [PATH:ko00660];E2.2.1.6L, ilvB, ilvG, ilvI; acetolactate synthase I/II/III large subunit [EC:2.2.1.6]	938	152	87	51	21	438	24
K01653	Carbohydrate metabolism;00660 C5-Branched dibasic acid metabolism [PATH:ko00660];E2.2.1.6S, ilvH, ilvN; acetolactate synthase I/III small subunit [EC:2.2.1.6]	125	15	23	9	5	46	6
K18292	Carbohydrate metabolism;00660 C5-Branched dibasic acid metabolism [PATH:ko00660];E4.1.3.25; (S)-citramalyl-CoA lyase [EC:4.1.3.25]	0	0	0	0	0	30	0
K19268	Carbohydrate metabolism;00660 C5-Branched dibasic acid metabolism [PATH:ko00660];glmE, mutE, mamB; methylaspartate mutase epsilon subunit [EC:5.4.99.1]	0	1	4	0	0	0	0
K01846	Carbohydrate metabolism;00660 C5-Branched dibasic acid metabolism [PATH:ko00660];glmS, mutS, mamA; methylaspartate mutase sigma subunit [EC:5.4.99.1]	0	0	3	0	0	0	0
K18291	Carbohydrate metabolism;00660 C5-Branched dibasic acid metabolism [PATH:ko00660];ich-P; itaconyl-CoA hydratase / mesaconyl-C4 CoA hydratase [EC:4.2.1.56 4.2.1.-]	0	0	0	0	0	34	0
K18289	Carbohydrate metabolism;00660 C5-Branched dibasic acid metabolism [PATH:ko00660];ict-P; itaconate CoA-transferase [EC:2.8.3.- 2.8.3.22]	0	6	0	0	0	35	0
K11258	Carbohydrate metabolism;00660 C5-Branched dibasic acid metabolism [PATH:ko00660];ilvM; acetolactate synthase II small subunit [EC:2.2.1.6]	84	0	12	14	0	0	5
K00052	Carbohydrate metabolism;00660 C5-Branched dibasic acid metabolism [PATH:ko00660];leuB, IMDH; 3-isopropylmalate dehydrogenase [EC:1.1.1.85]	232	32	27	16	8	76	5
K01703	Carbohydrate metabolism;00660 C5-Branched dibasic acid metabolism [PATH:ko00660];leuC, IPMI-L; 3-isopropylmalate/(R)-2-methylmalate dehydratase large subunit [EC:4.2.1.33 4.2.1.35]	304	37	17	22	5	114	4
K01704	Carbohydrate metabolism;00660 C5-Branched dibasic acid metabolism [PATH:ko00660];leuD, IPMI-S; 3-isopropylmalate/(R)-2-methylmalate dehydratase small subunit [EC:4.2.1.33 4.2.1.35]	186	26	14	21	3	61	3
K10218	Carbohydrate metabolism;00660 C5-Branched dibasic acid metabolism [PATH:ko00660];ligK, galC; 4-hydroxy-4-methyl-2-oxoglutarate aldolase [EC:4.1.3.17]	13	7	0	11	2	2	5
K04835	Carbohydrate metabolism;00660 C5-Branched dibasic acid metabolism [PATH:ko00660];mal; methylaspartate ammonia-lyase [EC:4.3.1.2]	0	0	4	0	0	0	0
K14472	Carbohydrate metabolism;00660 C5-Branched dibasic acid metabolism [PATH:ko00660];smtB; succinyl-CoA:(S)-malate CoA-transferase subunit B [EC:2.8.3.22]	0	2	0	0	0	0	0
K01903	Carbohydrate metabolism;00660 C5-Branched dibasic acid metabolism [PATH:ko00660];sucC; succinyl-CoA synthetase beta subunit [EC:6.2.1.5]	155	33	12	17	3	58	4
K01902	Carbohydrate metabolism;00660 C5-Branched dibasic acid metabolism [PATH:ko00660];sucD; succinyl-CoA synthetase alpha subunit [EC:6.2.1.5]	163	29	10	10	2	56	3
K06493	Cardiovascular diseases;05410 Hypertrophic cardiomyopathy (HCM) [PATH:ko05410];ITGB3, CD61; integrin beta 3	0	0	1	0	0	0	0
K06493	Cardiovascular diseases;05412 Arrhythmogenic right ventricular cardiomyopathy (ARVC) [PATH:ko05412];ITGB3, CD61; integrin beta 3	0	0	1	0	0	0	0
K06493	Cardiovascular diseases;05414 Dilated cardiomyopathy (DCM) [PATH:ko05414];ITGB3, CD61; integrin beta 3	0	0	1	0	0	0	0
K08738	Cardiovascular diseases;05416 Viral myocarditis [PATH:ko05416];CYC; cytochrome c	0	34	0	0	0	40	0
K01940	Cardiovascular diseases;05418 Fluid shear stress and atherosclerosis [PATH:ko05418];argG, ASS1; argininosuccinate synthase [EC:6.3.4.5]	259	39	24	29	1	68	3
K02183	Cardiovascular diseases;05418 Fluid shear stress and atherosclerosis [PATH:ko05418];CALM; calmodulin	0	0	0	0	0	1	0
K00799	Cardiovascular diseases;05418 Fluid shear stress and atherosclerosis [PATH:ko05418];GST, gst; glutathione S-transferase [EC:2.5.1.18]	715	258	64	63	22	553	28
K04079	Cardiovascular diseases;05418 Fluid shear stress and atherosclerosis [PATH:ko05418];HSP90A, htpG; molecular chaperone HtpG	301	32	21	25	0	91	5
K06493	Cardiovascular diseases;05418 Fluid shear stress and atherosclerosis [PATH:ko05418];ITGB3, CD61; integrin beta 3	0	0	1	0	0	0	0
K00355	Cardiovascular diseases;05418 Fluid shear stress and atherosclerosis [PATH:ko05418];NQO1; NAD(P)H dehydrogenase (quinone) [EC:1.6.5.2]	173	34	10	1	8	43	6
K03671	Cardiovascular diseases;05418 Fluid shear stress and atherosclerosis [PATH:ko05418];trxA; thioredoxin 1	86	28	9	32	4	124	4
K03355	Cell growth and death;04110 Cell cycle [PATH:ko04110];APC8, CDC23; anaphase-promoting complex subunit 8	0	1	0	0	0	0	0
K06640	Cell growth and death;04110 Cell cycle [PATH:ko04110];ATR; serine/threonine-protein kinase ATR [EC:2.7.11.1]	0	0	0	0	2	0	0
K03355	Cell growth and death;04111 Cell cycle - yeast [PATH:ko04111];APC8, CDC23; anaphase-promoting complex subunit 8	0	1	0	0	0	0	0
K01358	Cell growth and death;04112 Cell cycle - Caulobacter [PATH:ko04112];clpP, CLPP; ATP-dependent Clp protease, protease subunit [EC:3.4.21.92]	238	16	20	21	5	95	7
K03544	Cell growth and death;04112 Cell cycle - Caulobacter [PATH:ko04112];clpX, CLPX; ATP-dependent Clp protease ATP-binding subunit ClpX	167	16	12	28	4	63	4
K13590	Cell growth and death;04112 Cell cycle - Caulobacter [PATH:ko04112];dgcB; diguanylate cyclase [EC:2.7.7.65]	5	0	0	0	0	316	0
K02313	Cell growth and death;04112 Cell cycle - Caulobacter [PATH:ko04112];dnaA; chromosomal replication initiator protein	124	28	24	14	2	70	3
K02314	Cell growth and death;04112 Cell cycle - Caulobacter [PATH:ko04112];dnaB; replicative DNA helicase [EC:3.6.4.12]	329	25	16	28	12	139	7
K02651	Cell growth and death;04112 Cell cycle - Caulobacter [PATH:ko04112];flp, pilA; pilus assembly protein Flp/PilA	0	42	0	2	0	0	0
K03590	Cell growth and death;04112 Cell cycle - Caulobacter [PATH:ko04112];ftsA; cell division protein FtsA	138	34	13	17	2	67	8
K03589	Cell growth and death;04112 Cell cycle - Caulobacter [PATH:ko04112];ftsQ; cell division protein FtsQ	163	11	10	12	1	56	4
K03588	Cell growth and death;04112 Cell cycle - Caulobacter [PATH:ko04112];ftsW, spoVE; cell division protein FtsW	221	29	23	21	2	113	4
K03531	Cell growth and death;04112 Cell cycle - Caulobacter [PATH:ko04112];ftsZ; cell division protein FtsZ	101	28	14	102	0	82	5
K06985	Cell growth and death;04112 Cell cycle - Caulobacter [PATH:ko04112];K06985; aspartyl protease family protein	0	2	0	0	0	53	0
K01338	Cell growth and death;04112 Cell cycle - Caulobacter [PATH:ko04112];lon; ATP-dependent Lon protease [EC:3.4.21.53]	348	61	22	10	15	252	8
K02563	Cell growth and death;04112 Cell cycle - Caulobacter [PATH:ko04112];murG; UDP-N-acetylglucosamine--N-acetylmuramyl-(pentapeptide) pyrophosphoryl-undecaprenol N-acetylglucosamine transferase [EC:2.4.1.227]	238	21	13	19	8	77	4
K02488	Cell growth and death;04112 Cell cycle - Caulobacter [PATH:ko04112];pleD; two-component system, cell cycle response regulator [EC:2.7.7.65]	8	0	1	0	11	1	0
K11749	Cell growth and death;04112 Cell cycle - Caulobacter [PATH:ko04112];rseP; regulator of sigma E protease [EC:3.4.24.-]	190	21	16	15	1	102	4
K03355	Cell growth and death;04113 Meiosis - yeast [PATH:ko04113];APC8, CDC23; anaphase-promoting complex subunit 8	0	1	0	0	0	0	0
K01768	Cell growth and death;04113 Meiosis - yeast [PATH:ko04113];E4.6.1.1; adenylate cyclase [EC:4.6.1.1]	0	60	0	0	0	96	0
K03355	Cell growth and death;04114 Oocyte meiosis [PATH:ko04114];APC8, CDC23; anaphase-promoting complex subunit 8	0	1	0	0	0	0	0
K02183	Cell growth and death;04114 Oocyte meiosis [PATH:ko04114];CALM; calmodulin	0	0	0	0	0	1	0
K06640	Cell growth and death;04115 p53 signaling pathway [PATH:ko04115];ATR; serine/threonine-protein kinase ATR [EC:2.7.11.1]	0	0	0	0	2	0	0
K08738	Cell growth and death;04115 p53 signaling pathway [PATH:ko04115];CYC; cytochrome c	0	34	0	0	0	40	0
K08738	Cell growth and death;04210 Apoptosis [PATH:ko04210];CYC; cytochrome c	0	34	0	0	0	40	0
K01173	Cell growth and death;04210 Apoptosis [PATH:ko04210];ENDOG; endonuclease G, mitochondrial	231	7	3	14	1	60	4
K06640	Cell growth and death;04214 Apoptosis - fly [PATH:ko04214];ATR; serine/threonine-protein kinase ATR [EC:2.7.11.1]	0	0	0	0	2	0	0
K08738	Cell growth and death;04214 Apoptosis - fly [PATH:ko04214];CYC; cytochrome c	0	34	0	0	0	40	0
K03386	Cell growth and death;04214 Apoptosis - fly [PATH:ko04214];PRDX2_4, ahpC; peroxiredoxin (alkyl hydroperoxide reductase subunit C) [EC:1.11.1.15]	102	23	13	10	0	61	8
K08738	Cell growth and death;04215 Apoptosis - multiple species [PATH:ko04215];CYC; cytochrome c	0	34	0	0	0	40	0
K01897	Cell growth and death;04216 Ferroptosis [PATH:ko04216];ACSL, fadD; long-chain acyl-CoA synthetase [EC:6.2.1.3]	275	105	13	20	4	111	17
K00657	Cell growth and death;04216 Ferroptosis [PATH:ko04216];speG, SAT; diamine N-acetyltransferase [EC:2.3.1.57]	151	22	7	2	4	0	4
K01915	Cell growth and death;04217 Necroptosis [PATH:ko04217];glnA, GLUL; glutamine synthetase [EC:6.3.1.2]	248	91	14	22	9	456	13
K00261	Cell growth and death;04217 Necroptosis [PATH:ko04217];GLUD1_2, gdhA; glutamate dehydrogenase (NAD(P)+) [EC:1.4.1.3]	214	21	19	16	5	0	11
K04079	Cell growth and death;04217 Necroptosis [PATH:ko04217];HSP90A, htpG; molecular chaperone HtpG	301	32	21	25	0	91	5
K03767	Cell growth and death;04217 Necroptosis [PATH:ko04217];PPIA; peptidyl-prolyl cis-trans isomerase A (cyclophilin A) [EC:5.2.1.8]	145	11	13	13	1	35	4
K00688	Cell growth and death;04217 Necroptosis [PATH:ko04217];PYG, glgP; glycogen phosphorylase [EC:2.4.1.1]	1355	19	70	39	4	169	9
K06640	Cell growth and death;04218 Cellular senescence [PATH:ko04218];ATR; serine/threonine-protein kinase ATR [EC:2.7.11.1]	0	0	0	0	2	0	0
K02183	Cell growth and death;04218 Cellular senescence [PATH:ko04218];CALM; calmodulin	0	0	0	0	0	1	0
K03776	Cell motility;02030 Bacterial chemotaxis [PATH:ko02030];aer; aerotaxis receptor	370	34	32	14	5	115	0
K03407	Cell motility;02030 Bacterial chemotaxis [PATH:ko02030];cheA; two-component system, chemotaxis family, sensor kinase CheA [EC:2.7.13.3]	306	94	29	11	3	199	5
K03412	Cell motility;02030 Bacterial chemotaxis [PATH:ko02030];cheB; two-component system, chemotaxis family, response regulator CheB [EC:3.1.1.61]	179	71	20	14	2	166	4
K13924	Cell motility;02030 Bacterial chemotaxis [PATH:ko02030];cheBR; two-component system, chemotaxis family, CheB/CheR fusion protein [EC:2.1.1.80 3.1.1.61]	0	25	0	0	0	149	0
K03410	Cell motility;02030 Bacterial chemotaxis [PATH:ko02030];cheC; chemotaxis protein CheC	0	9	1	0	5	0	0
K03411	Cell motility;02030 Bacterial chemotaxis [PATH:ko02030];cheD; chemotaxis protein CheD [EC:3.5.1.44]	0	19	0	0	0	33	0
K00575	Cell motility;02030 Bacterial chemotaxis [PATH:ko02030];cheR; chemotaxis protein methyltransferase CheR [EC:2.1.1.80]	142	48	14	11	9	179	4
K03415	Cell motility;02030 Bacterial chemotaxis [PATH:ko02030];cheV; two-component system, chemotaxis family, response regulator CheV	205	8	11	20	0	108	0
K03408	Cell motility;02030 Bacterial chemotaxis [PATH:ko02030];cheW; purine-binding chemotaxis protein CheW	107	38	14	13	4	193	3
K03413	Cell motility;02030 Bacterial chemotaxis [PATH:ko02030];cheY; two-component system, chemotaxis family, response regulator CheY	64	39	13	10	4	83	4
K03414	Cell motility;02030 Bacterial chemotaxis [PATH:ko02030];cheZ; chemotaxis protein CheZ	228	15	10	10	5	49	4
K12368	Cell motility;02030 Bacterial chemotaxis [PATH:ko02030];dppA; dipeptide transport system substrate-binding protein	583	77	36	32	14	255	13
K02410	Cell motility;02030 Bacterial chemotaxis [PATH:ko02030];fliG; flagellar motor switch protein FliG	154	24	14	15	7	64	4
K02416	Cell motility;02030 Bacterial chemotaxis [PATH:ko02030];fliM; flagellar motor switch protein FliM	169	27	15	14	7	70	5
K02417	Cell motility;02030 Bacterial chemotaxis [PATH:ko02030];fliNY, fliN; flagellar motor switch protein FliN/FliY	85	11	8	9	4	39	3
K10108	Cell motility;02030 Bacterial chemotaxis [PATH:ko02030];malE; maltose/maltodextrin transport system substrate-binding protein	241	0	16	8	3	0	4
K03406	Cell motility;02030 Bacterial chemotaxis [PATH:ko02030];mcp; methyl-accepting chemotaxis protein	6878	294	156	127	39	4323	4
K10540	Cell motility;02030 Bacterial chemotaxis [PATH:ko02030];mglB; methyl-galactoside transport system substrate-binding protein	194	0	10	15	3	0	4
K02556	Cell motility;02030 Bacterial chemotaxis [PATH:ko02030];motA; chemotaxis protein MotA	152	48	15	13	5	104	3
K02557	Cell motility;02030 Bacterial chemotaxis [PATH:ko02030];motB; chemotaxis protein MotB	164	52	21	10	8	136	4
K10439	Cell motility;02030 Bacterial chemotaxis [PATH:ko02030];rbsB; ribose transport system substrate-binding protein	838	158	32	26	18	310	15
K05877	Cell motility;02030 Bacterial chemotaxis [PATH:ko02030];tap; methyl-accepting chemotaxis protein IV, peptide sensor receptor	1	0	19	0	0	0	4
K05875	Cell motility;02030 Bacterial chemotaxis [PATH:ko02030];tar; methyl-accepting chemotaxis protein II, aspartate sensor receptor	721	43	43	1	11	0	4
K05876	Cell motility;02030 Bacterial chemotaxis [PATH:ko02030];trg; methyl-accepting chemotaxis protein III, ribose and galactose sensor receptor	739	0	29	29	8	0	0
K05874	Cell motility;02030 Bacterial chemotaxis [PATH:ko02030];tsr; methyl-accepting chemotaxis protein I, serine sensor receptor	1361	105	69	51	10	0	5
K02386	Cell motility;02040 Flagellar assembly [PATH:ko02040];flgA; flagella basal body P-ring formation protein FlgA	165	22	12	20	2	68	3
K02387	Cell motility;02040 Flagellar assembly [PATH:ko02040];flgB; flagellar basal-body rod protein FlgB	99	9	12	8	7	39	4
K02388	Cell motility;02040 Flagellar assembly [PATH:ko02040];flgC; flagellar basal-body rod protein FlgC	90	9	13	7	2	39	4
K02389	Cell motility;02040 Flagellar assembly [PATH:ko02040];flgD; flagellar basal-body rod modification protein FlgD	139	17	20	10	3	65	4
K02390	Cell motility;02040 Flagellar assembly [PATH:ko02040];flgE; flagellar hook protein FlgE	202	28	18	13	6	111	7
K02391	Cell motility;02040 Flagellar assembly [PATH:ko02040];flgF; flagellar basal-body rod protein FlgF	139	14	18	9	3	61	3
K02392	Cell motility;02040 Flagellar assembly [PATH:ko02040];flgG; flagellar basal-body rod protein FlgG	157	18	11	12	7	61	7
K02393	Cell motility;02040 Flagellar assembly [PATH:ko02040];flgH; flagellar L-ring protein precursor FlgH	155	19	16	16	7	66	3
K02394	Cell motility;02040 Flagellar assembly [PATH:ko02040];flgI; flagellar P-ring protein precursor FlgI	224	26	19	19	4	68	4
K02396	Cell motility;02040 Flagellar assembly [PATH:ko02040];flgK; flagellar hook-associated protein 1 FlgK	277	39	24	21	7	108	7
K02397	Cell motility;02040 Flagellar assembly [PATH:ko02040];flgL; flagellar hook-associated protein 3 FlgL	218	29	14	14	11	98	4
K02398	Cell motility;02040 Flagellar assembly [PATH:ko02040];flgM; negative regulator of flagellin synthesis FlgM	89	16	31	8	3	34	3
K02399	Cell motility;02040 Flagellar assembly [PATH:ko02040];flgN; flagella synthesis protein FlgN	122	15	10	7	7	42	3
K02400	Cell motility;02040 Flagellar assembly [PATH:ko02040];flhA; flagellar biosynthesis protein FlhA	338	51	38	14	3	99	6
K02401	Cell motility;02040 Flagellar assembly [PATH:ko02040];flhB; flagellar biosynthetic protein FlhB	211	34	22	9	6	75	4
K02402	Cell motility;02040 Flagellar assembly [PATH:ko02040];flhC; flagellar transcriptional activator FlhC	85	19	11	10	6	10	5
K02403	Cell motility;02040 Flagellar assembly [PATH:ko02040];flhD; flagellar transcriptional activator FlhD	100	26	17	7	8	0	4
K02405	Cell motility;02040 Flagellar assembly [PATH:ko02040];fliA; RNA polymerase sigma factor for flagellar operon FliA	115	25	20	15	2	35	4
K02406	Cell motility;02040 Flagellar assembly [PATH:ko02040];fliC; flagellin	766	25	48	51	21	146	8
K02407	Cell motility;02040 Flagellar assembly [PATH:ko02040];fliD; flagellar hook-associated protein 2	393	39	40	23	8	88	3
K02408	Cell motility;02040 Flagellar assembly [PATH:ko02040];fliE; flagellar hook-basal body complex protein FliE	126	7	14	14	4	22	4
K02409	Cell motility;02040 Flagellar assembly [PATH:ko02040];fliF; flagellar M-ring protein FliF	261	29	26	15	4	93	5
K02410	Cell motility;02040 Flagellar assembly [PATH:ko02040];fliG; flagellar motor switch protein FliG	154	24	14	15	7	64	4
K02411	Cell motility;02040 Flagellar assembly [PATH:ko02040];fliH; flagellar assembly protein FliH	172	22	13	6	4	50	4
K02412	Cell motility;02040 Flagellar assembly [PATH:ko02040];fliI; flagellum-specific ATP synthase [EC:3.6.3.14]	223	36	34	20	2	82	6
K02413	Cell motility;02040 Flagellar assembly [PATH:ko02040];fliJ; flagellar FliJ protein	107	13	14	16	3	41	3
K02414	Cell motility;02040 Flagellar assembly [PATH:ko02040];fliK; flagellar hook-length control protein FliK	247	24	18	17	3	74	4
K02416	Cell motility;02040 Flagellar assembly [PATH:ko02040];fliM; flagellar motor switch protein FliM	169	27	15	14	7	70	5
K02417	Cell motility;02040 Flagellar assembly [PATH:ko02040];fliNY, fliN; flagellar motor switch protein FliN/FliY	85	11	8	9	4	39	3
K02418	Cell motility;02040 Flagellar assembly [PATH:ko02040];fliOZ, fliO; flagellar protein FliO/FliZ	95	15	9	7	4	27	4
K02419	Cell motility;02040 Flagellar assembly [PATH:ko02040];fliP; flagellar biosynthetic protein FliP	126	19	17	10	3	56	5
K02420	Cell motility;02040 Flagellar assembly [PATH:ko02040];fliQ; flagellar biosynthetic protein FliQ	87	9	8	9	2	30	4
K02421	Cell motility;02040 Flagellar assembly [PATH:ko02040];fliR; flagellar biosynthetic protein FliR	171	17	16	9	2	61	5
K02422	Cell motility;02040 Flagellar assembly [PATH:ko02040];fliS; flagellar protein FliS	121	12	18	11	6	40	3
K02423	Cell motility;02040 Flagellar assembly [PATH:ko02040];fliT; flagellar protein FliT	97	11	10	11	2	0	3
K02556	Cell motility;02040 Flagellar assembly [PATH:ko02040];motA; chemotaxis protein MotA	152	48	15	13	5	104	3
K02557	Cell motility;02040 Flagellar assembly [PATH:ko02040];motB; chemotaxis protein MotB	164	52	21	10	8	136	4
K06493	Cell motility;04810 Regulation of actin cytoskeleton [PATH:ko04810];ITGB3, CD61; integrin beta 3	0	0	1	0	0	0	0
K05747	Cell motility;04810 Regulation of actin cytoskeleton [PATH:ko04810];WAS; Wiskott-Aldrich syndrome protein	0	0	0	0	0	1	0
K06493	Cellular community - eukaryotes;04510 Focal adhesion [PATH:ko04510];ITGB3, CD61; integrin beta 3	0	0	1	0	0	0	0
K05747	Cellular community - eukaryotes;04520 Adherens junction [PATH:ko04520];WAS; Wiskott-Aldrich syndrome protein	0	0	0	0	0	1	0
K05747	Cellular community - eukaryotes;04530 Tight junction [PATH:ko04530];WAS; Wiskott-Aldrich syndrome protein	0	0	0	0	0	1	0
K02031	Cellular community - prokaryotes;02024 Quorum sensing [PATH:ko02024];ABC.PE.A; peptide/nickel transport system ATP-binding protein	413	12	57	23	17	159	10
K02032	Cellular community - prokaryotes;02024 Quorum sensing [PATH:ko02024];ABC.PE.A1; peptide/nickel transport system ATP-binding protein	1109	73	70	72	26	412	10
K02033	Cellular community - prokaryotes;02024 Quorum sensing [PATH:ko02024];ABC.PE.P; peptide/nickel transport system permease protein	933	72	74	55	20	306	11
K02034	Cellular community - prokaryotes;02024 Quorum sensing [PATH:ko02024];ABC.PE.P1; peptide/nickel transport system permease protein	820	51	60	58	17	312	15
K02035	Cellular community - prokaryotes;02024 Quorum sensing [PATH:ko02024];ABC.PE.S; peptide/nickel transport system substrate-binding protein	1754	116	108	94	35	574	19
K02052	Cellular community - prokaryotes;02024 Quorum sensing [PATH:ko02024];ABC.SP.A; putative spermidine/putrescine transport system ATP-binding protein	349	133	14	8	0	261	8
K02053	Cellular community - prokaryotes;02024 Quorum sensing [PATH:ko02024];ABC.SP.P; putative spermidine/putrescine transport system permease protein	601	117	11	4	0	285	6
K02054	Cellular community - prokaryotes;02024 Quorum sensing [PATH:ko02024];ABC.SP.P1; putative spermidine/putrescine transport system permease protein	353	87	11	8	1	214	8
K02055	Cellular community - prokaryotes;02024 Quorum sensing [PATH:ko02024];ABC.SP.S; putative spermidine/putrescine transport system substrate-binding protein	674	159	16	8	0	336	8
K01897	Cellular community - prokaryotes;02024 Quorum sensing [PATH:ko02024];ACSL, fadD; long-chain acyl-CoA synthetase [EC:6.2.1.3]	275	105	13	20	4	111	17
K13075	Cellular community - prokaryotes;02024 Quorum sensing [PATH:ko02024];ahlD, aiiA, attM, blcC; N-acyl homoserine lactone hydrolase [EC:3.1.1.81]	0	0	0	2	0	0	0
K19731	Cellular community - prokaryotes;02024 Quorum sensing [PATH:ko02024];cciR; LuxR family transcriptional regulator, quorum-sensing system regulator CciR	0	2	0	0	0	0	0
K10916	Cellular community - prokaryotes;02024 Quorum sensing [PATH:ko02024];cqsS; two-component system, CAI-1 autoinducer sensor kinase/phosphatase CqsS [EC:2.7.13.3 3.1.3.-]	0	1	0	0	0	0	0
K10914	Cellular community - prokaryotes;02024 Quorum sensing [PATH:ko02024];crp; CRP/FNR family transcriptional regulator, cyclic AMP receptor protein	25	0	0	14	0	54	0
K01626	Cellular community - prokaryotes;02024 Quorum sensing [PATH:ko02024];E2.5.1.54, aroF, aroG, aroH; 3-deoxy-7-phosphoheptulonate synthase [EC:2.5.1.54]	620	58	49	44	7	207	16
K01580	Cellular community - prokaryotes;02024 Quorum sensing [PATH:ko02024];E4.1.1.15, gadB, gadA, GAD; glutamate decarboxylase [EC:4.1.1.15]	0	1	0	0	0	0	0
K19734	Cellular community - prokaryotes;02024 Quorum sensing [PATH:ko02024];expR; LuxR family transcriptional regulator, quorum-sensing system regulator ExpR	81	0	3	12	0	0	13
K02402	Cellular community - prokaryotes;02024 Quorum sensing [PATH:ko02024];flhC; flagellar transcriptional activator FlhC	85	19	11	10	6	10	5
K02403	Cellular community - prokaryotes;02024 Quorum sensing [PATH:ko02024];flhD; flagellar transcriptional activator FlhD	100	26	17	7	8	0	4
K03110	Cellular community - prokaryotes;02024 Quorum sensing [PATH:ko02024];ftsY; fused signal recognition particle receptor	371	27	25	11	3	107	3
K07711	Cellular community - prokaryotes;02024 Quorum sensing [PATH:ko02024];glrK, qseE; two-component system, NtrC family, sensor histidine kinase GlrK [EC:2.7.13.3]	281	0	18	26	0	0	4
K07715	Cellular community - prokaryotes;02024 Quorum sensing [PATH:ko02024];glrR, qseF; two-component system, NtrC family, response regulator GlrR	257	0	20	23	0	2	3
K14051	Cellular community - prokaryotes;02024 Quorum sensing [PATH:ko02024];gmr; c-di-GMP phosphodiesterase Gmr [EC:3.1.4.52]	312	20	21	12	0	0	4
K03666	Cellular community - prokaryotes;02024 Quorum sensing [PATH:ko02024];hfq; host factor-I protein	49	16	12	11	1	30	4
K14645	Cellular community - prokaryotes;02024 Quorum sensing [PATH:ko02024];K14645; serine protease [EC:3.4.21.-]	0	38	0	0	0	0	0
K07667	Cellular community - prokaryotes;02024 Quorum sensing [PATH:ko02024];kdpE; two-component system, OmpR family, KDP operon response regulator KdpE	174	27	18	2	0	51	5
K01635	Cellular community - prokaryotes;02024 Quorum sensing [PATH:ko02024];lacD; tagatose 1,6-diphosphate aldolase [EC:4.1.2.40]	0	0	0	1	0	0	0
K13060	Cellular community - prokaryotes;02024 Quorum sensing [PATH:ko02024];lasI, luxI; acyl homoserine lactone synthase [EC:2.3.1.184]	53	2	6	11	0	0	4
K18304	Cellular community - prokaryotes;02024 Quorum sensing [PATH:ko02024];lasR; LuxR family transcriptional regulator, quorum-sensing system regulator LasR	0	6	0	0	0	1	0
K03100	Cellular community - prokaryotes;02024 Quorum sensing [PATH:ko02024];lepB, TPP; signal peptidase I [EC:3.4.21.89]	192	22	23	13	0	66	4
K01996	Cellular community - prokaryotes;02024 Quorum sensing [PATH:ko02024];livF; branched-chain amino acid transport system ATP-binding protein	218	121	50	11	5	180	13
K01995	Cellular community - prokaryotes;02024 Quorum sensing [PATH:ko02024];livG; branched-chain amino acid transport system ATP-binding protein	196	90	31	13	8	193	9
K01997	Cellular community - prokaryotes;02024 Quorum sensing [PATH:ko02024];livH; branched-chain amino acid transport system permease protein	201	102	26	18	20	206	12
K01999	Cellular community - prokaryotes;02024 Quorum sensing [PATH:ko02024];livK; branched-chain amino acid transport system substrate-binding protein	360	311	70	14	25	240	11
K01998	Cellular community - prokaryotes;02024 Quorum sensing [PATH:ko02024];livM; branched-chain amino acid transport system permease protein	330	129	53	16	9	246	12
K10558	Cellular community - prokaryotes;02024 Quorum sensing [PATH:ko02024];lsrA, ego; AI-2 transport system ATP-binding protein	2	0	13	0	2	0	0
K10555	Cellular community - prokaryotes;02024 Quorum sensing [PATH:ko02024];lsrB; AI-2 transport system substrate-binding protein	3	0	8	0	1	0	0
K10556	Cellular community - prokaryotes;02024 Quorum sensing [PATH:ko02024];lsrC; AI-2 transport system permease protein	2	0	10	0	0	0	3
K10557	Cellular community - prokaryotes;02024 Quorum sensing [PATH:ko02024];lsrD; AI-2 transport system permease protein	2	0	12	0	1	0	0
K08321	Cellular community - prokaryotes;02024 Quorum sensing [PATH:ko02024];lsrF; 3-hydroxy-5-phosphonooxypentane-2,4-dione thiolase [EC:2.3.1.245]	0	0	14	0	0	0	0
K11530	Cellular community - prokaryotes;02024 Quorum sensing [PATH:ko02024];lsrG; (4S)-4-hydroxy-5-phosphonooxypentane-2,3-dione isomerase [EC:5.3.1.32]	8	0	10	0	0	0	3
K11216	Cellular community - prokaryotes;02024 Quorum sensing [PATH:ko02024];lsrK; autoinducer-2 kinase [EC:2.7.1.189]	5	0	18	0	0	0	6
K11531	Cellular community - prokaryotes;02024 Quorum sensing [PATH:ko02024];lsrR; lsr operon transcriptional repressor	2	0	13	0	1	0	0
K15852	Cellular community - prokaryotes;02024 Quorum sensing [PATH:ko02024];luxR, vanR; LuxR family transcriptional regulator, transcriptional activator of the bioluminescence operon	0	0	0	0	0	0	1
K07173	Cellular community - prokaryotes;02024 Quorum sensing [PATH:ko02024];luxS; S-ribosylhomocysteine lyase [EC:4.4.1.21]	120	0	8	11	3	0	3
K18306	Cellular community - prokaryotes;02024 Quorum sensing [PATH:ko02024];mexH; membrane fusion protein, multidrug efflux system	0	0	0	0	0	1	3
K18307	Cellular community - prokaryotes;02024 Quorum sensing [PATH:ko02024];mexI; multidrug efflux pump	0	0	0	1	0	2	5
K11034	Cellular community - prokaryotes;02024 Quorum sensing [PATH:ko02024];nheBC; non-hemolytic enterotoxin B/C	0	0	3	0	0	0	0
K15580	Cellular community - prokaryotes;02024 Quorum sensing [PATH:ko02024];oppA, mppA; oligopeptide transport system substrate-binding protein	1046	21	69	61	3	0	20
K15581	Cellular community - prokaryotes;02024 Quorum sensing [PATH:ko02024];oppB; oligopeptide transport system permease protein	155	23	14	13	0	0	5
K15582	Cellular community - prokaryotes;02024 Quorum sensing [PATH:ko02024];oppC; oligopeptide transport system permease protein	183	17	16	10	0	0	3
K15583	Cellular community - prokaryotes;02024 Quorum sensing [PATH:ko02024];oppD; oligopeptide transport system ATP-binding protein	156	20	17	7	0	0	5
K10823	Cellular community - prokaryotes;02024 Quorum sensing [PATH:ko02024];oppF; oligopeptide transport system ATP-binding protein	206	21	12	13	1	0	5
K18139	Cellular community - prokaryotes;02024 Quorum sensing [PATH:ko02024];oprM, emhC, ttgC, cusC, adeK, smeF, mtrE, cmeC, gesC; outer membrane protein, multidrug efflux system	105	87	7	19	15	150	4
K01728	Cellular community - prokaryotes;02024 Quorum sensing [PATH:ko02024];pel; pectate lyase [EC:4.2.2.2]	0	0	0	0	1	0	0
K13063	Cellular community - prokaryotes;02024 Quorum sensing [PATH:ko02024];phzE; 2-amino-4-deoxychorismate synthase [EC:2.6.1.86]	5	11	0	0	0	0	0
K06998	Cellular community - prokaryotes;02024 Quorum sensing [PATH:ko02024];phzF; trans-2,3-dihydro-3-hydroxyanthranilate isomerase [EC:5.3.3.17]	4	6	1	0	0	1	0
K01114	Cellular community - prokaryotes;02024 Quorum sensing [PATH:ko02024];plc; phospholipase C [EC:3.1.4.3]	0	243	0	0	0	0	4
K07666	Cellular community - prokaryotes;02024 Quorum sensing [PATH:ko02024];qseB; two-component system, OmpR family, response regulator QseB	319	42	27	8	5	122	3
K07645	Cellular community - prokaryotes;02024 Quorum sensing [PATH:ko02024];qseC; two-component system, OmpR family, sensor histidine kinase QseC [EC:2.7.13.3]	345	3	23	14	3	205	6
K07781	Cellular community - prokaryotes;02024 Quorum sensing [PATH:ko02024];rcsA; LuxR family transcriptional regulator, capsular biosynthesis positive transcription factor	115	0	27	24	2	0	10
K12990	Cellular community - prokaryotes;02024 Quorum sensing [PATH:ko02024];rfbF, rhlC; rhamnosyltransferase [EC:2.4.1.-]	4	21	6	0	3	4	4
K18100	Cellular community - prokaryotes;02024 Quorum sensing [PATH:ko02024];rhlA; rhamnosyltransferase subunit A [EC:2.4.1.-]	89	11	0	0	0	0	0
K18101	Cellular community - prokaryotes;02024 Quorum sensing [PATH:ko02024];rhlB; rhamnosyltransferase subunit B [EC:2.4.1.-]	120	21	0	0	0	0	0
K13061	Cellular community - prokaryotes;02024 Quorum sensing [PATH:ko02024];rhlI, phzI, solI, cepI, tofI; acyl homoserine lactone synthase [EC:2.3.1.184]	106	14	0	10	0	1	0
K01497	Cellular community - prokaryotes;02024 Quorum sensing [PATH:ko02024];ribA, RIB1; GTP cyclohydrolase II [EC:3.5.4.25]	142	16	12	5	1	67	4
K11752	Cellular community - prokaryotes;02024 Quorum sensing [PATH:ko02024];ribD; diaminohydroxyphosphoribosylaminopyrimidine deaminase / 5-amino-6-(5-phosphoribosylamino)uracil reductase [EC:3.5.4.26 1.1.1.193]	233	22	16	16	0	85	4
K13816	Cellular community - prokaryotes;02024 Quorum sensing [PATH:ko02024];rpfF; DSF synthase	140	17	12	8	0	0	5
K11749	Cellular community - prokaryotes;02024 Quorum sensing [PATH:ko02024];rseP; regulator of sigma E protease [EC:3.4.24.-]	190	21	16	15	1	102	4
K07782	Cellular community - prokaryotes;02024 Quorum sensing [PATH:ko02024];sdiA; LuxR family transcriptional regulator, quorum-sensing system regulator SdiA	130	12	13	10	2	58	4
K03070	Cellular community - prokaryotes;02024 Quorum sensing [PATH:ko02024];secA; preprotein translocase subunit SecA	440	44	29	16	7	213	4
K03071	Cellular community - prokaryotes;02024 Quorum sensing [PATH:ko02024];secB; preprotein translocase subunit SecB	105	7	12	10	3	57	5
K03073	Cellular community - prokaryotes;02024 Quorum sensing [PATH:ko02024];secE; preprotein translocase subunit SecE	71	9	16	8	0	40	3
K03075	Cellular community - prokaryotes;02024 Quorum sensing [PATH:ko02024];secG; preprotein translocase subunit SecG	86	13	10	11	0	32	3
K03076	Cellular community - prokaryotes;02024 Quorum sensing [PATH:ko02024];secY; preprotein translocase subunit SecY	88	29	13	58	0	87	3
K19666	Cellular community - prokaryotes;02024 Quorum sensing [PATH:ko02024];solR, cepR, tofR; LuxR family transcriptional regulator, quorum-sensing system regulator SolR	0	14	0	0	0	0	0
K15654	Cellular community - prokaryotes;02024 Quorum sensing [PATH:ko02024];srfAA, lchAA; surfactin family lipopeptide synthetase A	0	0	0	0	0	0	1
K03106	Cellular community - prokaryotes;02024 Quorum sensing [PATH:ko02024];SRP54, ffh; signal recognition particle subunit SRP54 [EC:3.6.5.4]	196	17	20	50	0	108	3
K09936	Cellular community - prokaryotes;02024 Quorum sensing [PATH:ko02024];TC.BAT2; bacterial/archaeal transporter family-2 protein	71	17	30	5	8	86	11
K07344	Cellular community - prokaryotes;02024 Quorum sensing [PATH:ko02024];trbL; type IV secretion system protein TrbL	10	1	0	0	1	10	1
K01657	Cellular community - prokaryotes;02024 Quorum sensing [PATH:ko02024];trpE; anthranilate synthase component I [EC:4.1.3.27]	265	27	25	16	0	100	4
K01658	Cellular community - prokaryotes;02024 Quorum sensing [PATH:ko02024];trpG; anthranilate synthase component II [EC:4.1.3.27]	83	16	0	7	0	71	6
K03210	Cellular community - prokaryotes;02024 Quorum sensing [PATH:ko02024];yajC; preprotein translocase subunit YajC	106	10	9	8	0	30	3
K03217	Cellular community - prokaryotes;02024 Quorum sensing [PATH:ko02024];yidC, spoIIIJ, OXA1, ccfA; YidC/Oxa1 family membrane protein insertase	263	32	17	24	5	142	4
K09823	Cellular community - prokaryotes;02024 Quorum sensing [PATH:ko02024];zur; Fur family transcriptional regulator, zinc uptake regulator	130	18	11	9	4	46	4
K19291	Cellular community - prokaryotes;02025 Biofilm formation - Pseudomonas aeruginosa [PATH:ko02025];alg44; mannuronan synthase [EC:2.4.1.33]	0	0	0	0	0	14	0
K16011	Cellular community - prokaryotes;02025 Biofilm formation - Pseudomonas aeruginosa [PATH:ko02025];algA, xanB, rfbA, wbpW, pslB; mannose-1-phosphate guanylyltransferase / mannose-6-phosphate isomerase [EC:2.7.7.13 5.3.1.8]	0	66	0	0	0	123	0
K07678	Cellular community - prokaryotes;02025 Biofilm formation - Pseudomonas aeruginosa [PATH:ko02025];barA, gacS, varS; two-component system, NarL family, sensor histidine kinase BarA [EC:2.7.13.3]	526	0	25	16	4	149	8
K06596	Cellular community - prokaryotes;02025 Biofilm formation - Pseudomonas aeruginosa [PATH:ko02025];chpA; chemosensory pili system protein ChpA (sensor histidine kinase/response regulator)	0	0	0	0	0	448	0
K06598	Cellular community - prokaryotes;02025 Biofilm formation - Pseudomonas aeruginosa [PATH:ko02025];chpC; chemosensory pili system protein ChpC	0	0	0	0	0	62	0
K03651	Cellular community - prokaryotes;02025 Biofilm formation - Pseudomonas aeruginosa [PATH:ko02025];cpdA; 3',5'-cyclic-AMP phosphodiesterase [EC:3.1.4.53]	184	0	8	12	3	75	7
K10914	Cellular community - prokaryotes;02025 Biofilm formation - Pseudomonas aeruginosa [PATH:ko02025];crp; CRP/FNR family transcriptional regulator, cyclic AMP receptor protein	25	0	0	14	0	54	0
K03563	Cellular community - prokaryotes;02025 Biofilm formation - Pseudomonas aeruginosa [PATH:ko02025];csrA; carbon storage regulator	43	1	2	17	0	25	3
K01768	Cellular community - prokaryotes;02025 Biofilm formation - Pseudomonas aeruginosa [PATH:ko02025];E4.6.1.1; adenylate cyclase [EC:4.6.1.1]	0	60	0	0	0	96	0
K10941	Cellular community - prokaryotes;02025 Biofilm formation - Pseudomonas aeruginosa [PATH:ko02025];fleQ, flrA; sigma-54 dependent transcriptional regulator, flagellar regulatory protein	0	0	0	0	0	95	0
K02398	Cellular community - prokaryotes;02025 Biofilm formation - Pseudomonas aeruginosa [PATH:ko02025];flgM; negative regulator of flagellin synthesis FlgM	89	16	31	8	3	34	3
K02405	Cellular community - prokaryotes;02025 Biofilm formation - Pseudomonas aeruginosa [PATH:ko02025];fliA; RNA polymerase sigma factor for flagellar operon FliA	115	25	20	15	2	35	4
K11903	Cellular community - prokaryotes;02025 Biofilm formation - Pseudomonas aeruginosa [PATH:ko02025];hcp; type VI secretion system secreted protein Hcp	427	31	140	68	44	62	20
K11902	Cellular community - prokaryotes;02025 Biofilm formation - Pseudomonas aeruginosa [PATH:ko02025];impA; type VI secretion system protein ImpA	168	37	25	28	1	45	6
K11901	Cellular community - prokaryotes;02025 Biofilm formation - Pseudomonas aeruginosa [PATH:ko02025];impB; type VI secretion system protein ImpB	195	32	33	23	3	70	8
K11900	Cellular community - prokaryotes;02025 Biofilm formation - Pseudomonas aeruginosa [PATH:ko02025];impC; type VI secretion system protein ImpC	426	46	85	35	5	148	8
K11895	Cellular community - prokaryotes;02025 Biofilm formation - Pseudomonas aeruginosa [PATH:ko02025];impH, vasB; type VI secretion system protein ImpH	253	43	47	31	10	107	10
K11893	Cellular community - prokaryotes;02025 Biofilm formation - Pseudomonas aeruginosa [PATH:ko02025];impJ, vasE; type VI secretion system protein ImpJ	303	44	75	30	22	135	14
K11891	Cellular community - prokaryotes;02025 Biofilm formation - Pseudomonas aeruginosa [PATH:ko02025];impL, vasK, icmF; type VI secretion system protein ImpL	1077	124	191	116	63	311	20
K11890	Cellular community - prokaryotes;02025 Biofilm formation - Pseudomonas aeruginosa [PATH:ko02025];impM; type VI secretion system protein ImpM	265	18	12	21	9	22	3
K13060	Cellular community - prokaryotes;02025 Biofilm formation - Pseudomonas aeruginosa [PATH:ko02025];lasI, luxI; acyl homoserine lactone synthase [EC:2.3.1.184]	53	2	6	11	0	0	4
K18304	Cellular community - prokaryotes;02025 Biofilm formation - Pseudomonas aeruginosa [PATH:ko02025];lasR; LuxR family transcriptional regulator, quorum-sensing system regulator LasR	0	6	0	0	0	1	0
K02657	Cellular community - prokaryotes;02025 Biofilm formation - Pseudomonas aeruginosa [PATH:ko02025];pilG; twitching motility two-component system response regulator PilG	0	0	0	0	0	44	0
K02658	Cellular community - prokaryotes;02025 Biofilm formation - Pseudomonas aeruginosa [PATH:ko02025];pilH; twitching motility two-component system response regulator PilH	0	1	0	0	0	34	0
K02659	Cellular community - prokaryotes;02025 Biofilm formation - Pseudomonas aeruginosa [PATH:ko02025];pilI; twitching motility protein PilI	0	0	0	0	0	42	0
K02660	Cellular community - prokaryotes;02025 Biofilm formation - Pseudomonas aeruginosa [PATH:ko02025];pilJ; twitching motility protein PilJ	0	0	0	0	0	148	0
K11912	Cellular community - prokaryotes;02025 Biofilm formation - Pseudomonas aeruginosa [PATH:ko02025];ppkA; serine/threonine-protein kinase PpkA [EC:2.7.11.1]	0	0	0	0	0	1	0
K12990	Cellular community - prokaryotes;02025 Biofilm formation - Pseudomonas aeruginosa [PATH:ko02025];rfbF, rhlC; rhamnosyltransferase [EC:2.4.1.-]	4	21	6	0	3	4	4
K12992	Cellular community - prokaryotes;02025 Biofilm formation - Pseudomonas aeruginosa [PATH:ko02025];rfbN; rhamnosyltransferase [EC:2.4.1.-]	0	0	3	0	14	33	0
K18100	Cellular community - prokaryotes;02025 Biofilm formation - Pseudomonas aeruginosa [PATH:ko02025];rhlA; rhamnosyltransferase subunit A [EC:2.4.1.-]	89	11	0	0	0	0	0
K18101	Cellular community - prokaryotes;02025 Biofilm formation - Pseudomonas aeruginosa [PATH:ko02025];rhlB; rhamnosyltransferase subunit B [EC:2.4.1.-]	120	21	0	0	0	0	0
K13061	Cellular community - prokaryotes;02025 Biofilm formation - Pseudomonas aeruginosa [PATH:ko02025];rhlI, phzI, solI, cepI, tofI; acyl homoserine lactone synthase [EC:2.3.1.184]	106	14	0	10	0	1	0
K11915	Cellular community - prokaryotes;02025 Biofilm formation - Pseudomonas aeruginosa [PATH:ko02025];stp1, pppA; serine/threonine protein phosphatase Stp1 [EC:3.1.3.16]	0	0	0	0	0	53	0
K01657	Cellular community - prokaryotes;02025 Biofilm formation - Pseudomonas aeruginosa [PATH:ko02025];trpE; anthranilate synthase component I [EC:4.1.3.27]	265	27	25	16	0	100	4
K01658	Cellular community - prokaryotes;02025 Biofilm formation - Pseudomonas aeruginosa [PATH:ko02025];trpG; anthranilate synthase component II [EC:4.1.3.27]	83	16	0	7	0	71	6
K07689	Cellular community - prokaryotes;02025 Biofilm formation - Pseudomonas aeruginosa [PATH:ko02025];uvrY, gacA, varA; two-component system, NarL family, invasion response regulator UvrY	102	0	7	12	4	3	4
K11907	Cellular community - prokaryotes;02025 Biofilm formation - Pseudomonas aeruginosa [PATH:ko02025];vasG, clpV; type VI secretion system protein VasG	503	86	175	63	21	211	15
K13487	Cellular community - prokaryotes;02025 Biofilm formation - Pseudomonas aeruginosa [PATH:ko02025];wspA; methyl-accepting chemotaxis protein WspA	0	38	0	0	0	97	0
K13488	Cellular community - prokaryotes;02025 Biofilm formation - Pseudomonas aeruginosa [PATH:ko02025];wspB; chemotaxis-related protein WspB	0	17	0	0	0	40	0
K13489	Cellular community - prokaryotes;02025 Biofilm formation - Pseudomonas aeruginosa [PATH:ko02025];wspD; chemotaxis-related protein WspD	0	20	0	0	0	42	0
K13490	Cellular community - prokaryotes;02025 Biofilm formation - Pseudomonas aeruginosa [PATH:ko02025];wspE; two-component system, chemotaxis family, sensor histidine kinase and response regulator WspE	0	33	0	0	0	113	0
K13491	Cellular community - prokaryotes;02025 Biofilm formation - Pseudomonas aeruginosa [PATH:ko02025];wspF; two-component system, chemotaxis family, response regulator WspF [EC:3.1.1.61]	0	19	0	0	0	73	0
K11444	Cellular community - prokaryotes;02025 Biofilm formation - Pseudomonas aeruginosa [PATH:ko02025];wspR; two-component system, chemotaxis family, response regulator WspR [EC:2.7.7.65]	0	19	0	0	0	74	0
K01991	Cellular community - prokaryotes;02026 Biofilm formation - Escherichia coli [PATH:ko02026];ABC-2.OM, wza; polysaccharide biosynthesis/export protein	207	84	27	13	10	84	10
K18968	Cellular community - prokaryotes;02026 Biofilm formation - Escherichia coli [PATH:ko02026];adrA; diguanylate cyclase [EC:2.7.7.65]	0	0	7	1	0	63	3
K07773	Cellular community - prokaryotes;02026 Biofilm formation - Escherichia coli [PATH:ko02026];arcA; two-component system, OmpR family, aerobic respiration control protein ArcA	119	0	12	12	1	0	3
K07648	Cellular community - prokaryotes;02026 Biofilm formation - Escherichia coli [PATH:ko02026];arcB; two-component system, OmpR family, aerobic respiration control sensor histidine kinase ArcB [EC:2.7.13.3]	472	0	24	24	7	0	4
K07678	Cellular community - prokaryotes;02026 Biofilm formation - Escherichia coli [PATH:ko02026];barA, gacS, varS; two-component system, NarL family, sensor histidine kinase BarA [EC:2.7.13.3]	526	0	25	16	4	149	8
K00694	Cellular community - prokaryotes;02026 Biofilm formation - Escherichia coli [PATH:ko02026];bcsA; cellulose synthase (UDP-forming) [EC:2.4.1.12]	864	30	48	38	13	88	4
K10914	Cellular community - prokaryotes;02026 Biofilm formation - Escherichia coli [PATH:ko02026];crp; CRP/FNR family transcriptional regulator, cyclic AMP receptor protein	25	0	0	14	0	54	0
K04334	Cellular community - prokaryotes;02026 Biofilm formation - Escherichia coli [PATH:ko02026];csgA; major curlin subunit	0	0	7	0	0	0	0
K04335	Cellular community - prokaryotes;02026 Biofilm formation - Escherichia coli [PATH:ko02026];csgB; minor curlin subunit	0	0	10	0	0	27	0
K04336	Cellular community - prokaryotes;02026 Biofilm formation - Escherichia coli [PATH:ko02026];csgC; curli production protein	0	0	7	0	0	0	0
K04333	Cellular community - prokaryotes;02026 Biofilm formation - Escherichia coli [PATH:ko02026];csgD; LuxR family transcriptional regulator, csgAB operon transcriptional regulatory protein	0	0	6	0	0	0	0
K03563	Cellular community - prokaryotes;02026 Biofilm formation - Escherichia coli [PATH:ko02026];csrA; carbon storage regulator	43	1	2	17	0	25	3
K05851	Cellular community - prokaryotes;02026 Biofilm formation - Escherichia coli [PATH:ko02026];cyaA; adenylate cyclase, class 1 [EC:4.6.1.1]	456	0	31	20	3	35	5
K06204	Cellular community - prokaryotes;02026 Biofilm formation - Escherichia coli [PATH:ko02026];dksA; DnaK suppressor protein	80	7	7	7	4	66	6
K07638	Cellular community - prokaryotes;02026 Biofilm formation - Escherichia coli [PATH:ko02026];envZ; two-component system, OmpR family, osmolarity sensor histidine kinase EnvZ [EC:2.7.13.3]	246	60	21	21	2	112	6
K02398	Cellular community - prokaryotes;02026 Biofilm formation - Escherichia coli [PATH:ko02026];flgM; negative regulator of flagellin synthesis FlgM	89	16	31	8	3	34	3
K02402	Cellular community - prokaryotes;02026 Biofilm formation - Escherichia coli [PATH:ko02026];flhC; flagellar transcriptional activator FlhC	85	19	11	10	6	10	5
K02403	Cellular community - prokaryotes;02026 Biofilm formation - Escherichia coli [PATH:ko02026];flhD; flagellar transcriptional activator FlhD	100	26	17	7	8	0	4
K02405	Cellular community - prokaryotes;02026 Biofilm formation - Escherichia coli [PATH:ko02026];fliA; RNA polymerase sigma factor for flagellar operon FliA	115	25	20	15	2	35	4
K02425	Cellular community - prokaryotes;02026 Biofilm formation - Escherichia coli [PATH:ko02026];fliZ; regulator of sigma S factor FliZ	115	0	12	12	0	0	6
K12687	Cellular community - prokaryotes;02026 Biofilm formation - Escherichia coli [PATH:ko02026];flu; antigen 43	14	2	7	0	0	0	0
K03566	Cellular community - prokaryotes;02026 Biofilm formation - Escherichia coli [PATH:ko02026];gcvA; LysR family transcriptional regulator, glycine cleavage system transcriptional activator	581	134	55	11	23	341	33
K03567	Cellular community - prokaryotes;02026 Biofilm formation - Escherichia coli [PATH:ko02026];gcvR; glycine cleavage system transcriptional repressor	149	0	8	9	5	52	4
K00703	Cellular community - prokaryotes;02026 Biofilm formation - Escherichia coli [PATH:ko02026];glgA; starch synthase [EC:2.4.1.21]	282	7	15	12	3	104	4
K00975	Cellular community - prokaryotes;02026 Biofilm formation - Escherichia coli [PATH:ko02026];glgC; glucose-1-phosphate adenylyltransferase [EC:2.7.7.27]	262	3	19	13	3	0	6
K14051	Cellular community - prokaryotes;02026 Biofilm formation - Escherichia coli [PATH:ko02026];gmr; c-di-GMP phosphodiesterase Gmr [EC:3.1.4.52]	312	20	21	12	0	0	4
K11531	Cellular community - prokaryotes;02026 Biofilm formation - Escherichia coli [PATH:ko02026];lsrR; lsr operon transcriptional repressor	2	0	13	0	1	0	0
K07173	Cellular community - prokaryotes;02026 Biofilm formation - Escherichia coli [PATH:ko02026];luxS; S-ribosylhomocysteine lyase [EC:4.4.1.21]	120	0	8	11	3	0	3
K07659	Cellular community - prokaryotes;02026 Biofilm formation - Escherichia coli [PATH:ko02026];ompR; two-component system, OmpR family, phosphate regulon response regulator OmpR	13	38	0	5	0	70	0
K04761	Cellular community - prokaryotes;02026 Biofilm formation - Escherichia coli [PATH:ko02026];oxyR; LysR family transcriptional regulator, hydrogen peroxide-inducible genes activator	203	23	12	16	5	79	3
K11935	Cellular community - prokaryotes;02026 Biofilm formation - Escherichia coli [PATH:ko02026];pgaA; biofilm PGA synthesis protein PgaA	0	0	34	0	0	0	6
K11931	Cellular community - prokaryotes;02026 Biofilm formation - Escherichia coli [PATH:ko02026];pgaB; poly-beta-1,6-N-acetyl-D-glucosamine N-deacetylase [EC:3.5.1.-]	0	31	46	0	3	0	5
K11936	Cellular community - prokaryotes;02026 Biofilm formation - Escherichia coli [PATH:ko02026];pgaC, icaA; poly-beta-1,6-N-acetyl-D-glucosamine synthase [EC:2.4.1.-]	0	20	17	7	0	2	4
K11937	Cellular community - prokaryotes;02026 Biofilm formation - Escherichia coli [PATH:ko02026];pgaD; biofilm PGA synthesis protein PgaD	0	0	10	0	0	0	3
K02777	Cellular community - prokaryotes;02026 Biofilm formation - Escherichia coli [PATH:ko02026];PTS-Glc-EIIA, crr; PTS system, sugar-specific IIA component [EC:2.7.1.-]	108	0	8	11	3	0	3
K00688	Cellular community - prokaryotes;02026 Biofilm formation - Escherichia coli [PATH:ko02026];PYG, glgP; glycogen phosphorylase [EC:2.4.1.1]	1355	19	70	39	4	169	9
K07781	Cellular community - prokaryotes;02026 Biofilm formation - Escherichia coli [PATH:ko02026];rcsA; LuxR family transcriptional regulator, capsular biosynthesis positive transcription factor	115	0	27	24	2	0	10
K07687	Cellular community - prokaryotes;02026 Biofilm formation - Escherichia coli [PATH:ko02026];rcsB; two-component system, NarL family, captular synthesis response regulator RcsB	220	44	24	12	9	3	12
K07677	Cellular community - prokaryotes;02026 Biofilm formation - Escherichia coli [PATH:ko02026];rcsC; two-component system, NarL family, capsular synthesis sensor histidine kinase RcsC [EC:2.7.13.3]	486	76	33	28	4	1	7
K07676	Cellular community - prokaryotes;02026 Biofilm formation - Escherichia coli [PATH:ko02026];rcsD; two-component system, NarL family, sensor histidine kinase RcsD [EC:2.7.13.3]	357	0	21	32	3	0	9
K07782	Cellular community - prokaryotes;02026 Biofilm formation - Escherichia coli [PATH:ko02026];sdiA; LuxR family transcriptional regulator, quorum-sensing system regulator SdiA	130	12	13	10	2	58	4
K03087	Cellular community - prokaryotes;02026 Biofilm formation - Escherichia coli [PATH:ko02026];SIG2, rpoS; RNA polymerase nonessential primary-like sigma factor	110	17	14	28	2	61	3
K07689	Cellular community - prokaryotes;02026 Biofilm formation - Escherichia coli [PATH:ko02026];uvrY, gacA, varA; two-component system, NarL family, invasion response regulator UvrY	102	0	7	12	4	3	4
K10938	Cellular community - prokaryotes;05111 Biofilm formation - Vibrio cholerae [PATH:ko05111];acfC; accessory colonization factor AcfC	0	1	0	0	0	0	0
K10918	Cellular community - prokaryotes;05111 Biofilm formation - Vibrio cholerae [PATH:ko05111];aphB; LysR family transcriptional regulator, transcriptional activator AphB	0	1	0	0	0	2	0
K07678	Cellular community - prokaryotes;05111 Biofilm formation - Vibrio cholerae [PATH:ko05111];barA, gacS, varS; two-component system, NarL family, sensor histidine kinase BarA [EC:2.7.13.3]	526	0	25	16	4	149	8
K07181	Cellular community - prokaryotes;05111 Biofilm formation - Vibrio cholerae [PATH:ko05111];cdgJ; c-di-GMP phosphodiesterase [EC:3.1.4.52]	0	9	15	0	5	0	0
K10916	Cellular community - prokaryotes;05111 Biofilm formation - Vibrio cholerae [PATH:ko05111];cqsS; two-component system, CAI-1 autoinducer sensor kinase/phosphatase CqsS [EC:2.7.13.3 3.1.3.-]	0	1	0	0	0	0	0
K10914	Cellular community - prokaryotes;05111 Biofilm formation - Vibrio cholerae [PATH:ko05111];crp; CRP/FNR family transcriptional regulator, cyclic AMP receptor protein	25	0	0	14	0	54	0
K03563	Cellular community - prokaryotes;05111 Biofilm formation - Vibrio cholerae [PATH:ko05111];csrA; carbon storage regulator	43	1	2	17	0	25	3
K05851	Cellular community - prokaryotes;05111 Biofilm formation - Vibrio cholerae [PATH:ko05111];cyaA; adenylate cyclase, class 1 [EC:4.6.1.1]	456	0	31	20	3	35	5
K00640	Cellular community - prokaryotes;05111 Biofilm formation - Vibrio cholerae [PATH:ko05111];cysE; serine O-acetyltransferase [EC:2.3.1.30]	182	53	9	24	7	168	5
K03557	Cellular community - prokaryotes;05111 Biofilm formation - Vibrio cholerae [PATH:ko05111];fis; Fis family transcriptional regulator, factor for inversion stimulation protein	0	9	35	0	0	21	4
K10941	Cellular community - prokaryotes;05111 Biofilm formation - Vibrio cholerae [PATH:ko05111];fleQ, flrA; sigma-54 dependent transcriptional regulator, flagellar regulatory protein	0	0	0	0	0	95	0
K02405	Cellular community - prokaryotes;05111 Biofilm formation - Vibrio cholerae [PATH:ko05111];fliA; RNA polymerase sigma factor for flagellar operon FliA	115	25	20	15	2	35	4
K10942	Cellular community - prokaryotes;05111 Biofilm formation - Vibrio cholerae [PATH:ko05111];flrB, fleS; two-component system, sensor histidine kinase FlrB [EC:2.7.13.3]	0	0	0	0	0	97	0
K10943	Cellular community - prokaryotes;05111 Biofilm formation - Vibrio cholerae [PATH:ko05111];flrC, fleR; two-component system, response regulator FlrC	2	0	0	0	0	105	0
K02452	Cellular community - prokaryotes;05111 Biofilm formation - Vibrio cholerae [PATH:ko05111];gspC; general secretion pathway protein C	0	14	6	0	0	3	1
K02453	Cellular community - prokaryotes;05111 Biofilm formation - Vibrio cholerae [PATH:ko05111];gspD; general secretion pathway protein D	1	67	26	7	2	136	1
K02454	Cellular community - prokaryotes;05111 Biofilm formation - Vibrio cholerae [PATH:ko05111];gspE; general secretion pathway protein E	0	46	23	1	4	167	1
K02455	Cellular community - prokaryotes;05111 Biofilm formation - Vibrio cholerae [PATH:ko05111];gspF; general secretion pathway protein F	0	55	13	1	5	53	2
K02456	Cellular community - prokaryotes;05111 Biofilm formation - Vibrio cholerae [PATH:ko05111];gspG; general secretion pathway protein G	0	47	23	1	2	36	1
K02457	Cellular community - prokaryotes;05111 Biofilm formation - Vibrio cholerae [PATH:ko05111];gspH; general secretion pathway protein H	0	21	7	0	0	28	1
K02458	Cellular community - prokaryotes;05111 Biofilm formation - Vibrio cholerae [PATH:ko05111];gspI; general secretion pathway protein I	0	17	7	1	0	6	1
K02459	Cellular community - prokaryotes;05111 Biofilm formation - Vibrio cholerae [PATH:ko05111];gspJ; general secretion pathway protein J	0	27	7	1	0	41	5
K02460	Cellular community - prokaryotes;05111 Biofilm formation - Vibrio cholerae [PATH:ko05111];gspK; general secretion pathway protein K	0	24	9	0	0	40	5
K02461	Cellular community - prokaryotes;05111 Biofilm formation - Vibrio cholerae [PATH:ko05111];gspL; general secretion pathway protein L	0	19	10	0	1	60	1
K02462	Cellular community - prokaryotes;05111 Biofilm formation - Vibrio cholerae [PATH:ko05111];gspM; general secretion pathway protein M	0	13	6	0	2	12	1
K02463	Cellular community - prokaryotes;05111 Biofilm formation - Vibrio cholerae [PATH:ko05111];gspN; general secretion pathway protein N	0	18	0	0	1	43	0
K03666	Cellular community - prokaryotes;05111 Biofilm formation - Vibrio cholerae [PATH:ko05111];hfq; host factor-I protein	49	16	12	11	1	30	4
K07173	Cellular community - prokaryotes;05111 Biofilm formation - Vibrio cholerae [PATH:ko05111];luxS; S-ribosylhomocysteine lyase [EC:4.4.1.21]	120	0	8	11	3	0	3
K12276	Cellular community - prokaryotes;05111 Biofilm formation - Vibrio cholerae [PATH:ko05111];mshE; MSHA biogenesis protein MshE	0	0	0	0	0	1	0
K08720	Cellular community - prokaryotes;05111 Biofilm formation - Vibrio cholerae [PATH:ko05111];ompU; outer membrane protein OmpU	0	43	0	0	0	0	0
K01912	Cellular community - prokaryotes;05111 Biofilm formation - Vibrio cholerae [PATH:ko05111];paaK; phenylacetate-CoA ligase [EC:6.2.1.30]	20	67	32	1	6	7	4
K02777	Cellular community - prokaryotes;05111 Biofilm formation - Vibrio cholerae [PATH:ko05111];PTS-Glc-EIIA, crr; PTS system, sugar-specific IIA component [EC:2.7.1.-]	108	0	8	11	3	0	3
K02778	Cellular community - prokaryotes;05111 Biofilm formation - Vibrio cholerae [PATH:ko05111];PTS-Glc-EIIB, ptsG; PTS system, glucose-specific IIB component [EC:2.7.1.199]	36	0	1	1	3	0	0
K02779	Cellular community - prokaryotes;05111 Biofilm formation - Vibrio cholerae [PATH:ko05111];PTS-Glc-EIIC, ptsG; PTS system, glucose-specific IIC component	220	1	16	8	2	0	8
K03087	Cellular community - prokaryotes;05111 Biofilm formation - Vibrio cholerae [PATH:ko05111];SIG2, rpoS; RNA polymerase nonessential primary-like sigma factor	110	17	14	28	2	61	3
K03092	Cellular community - prokaryotes;05111 Biofilm formation - Vibrio cholerae [PATH:ko05111];SIG54, rpoN; RNA polymerase sigma-54 factor	251	57	18	22	5	70	5
K05946	Cellular community - prokaryotes;05111 Biofilm formation - Vibrio cholerae [PATH:ko05111];tagA, tarA; N-acetylglucosaminyldiphosphoundecaprenol N-acetyl-beta-D-mannosaminyltransferase [EC:2.4.1.187]	0	5	0	0	0	6	0
K10962	Cellular community - prokaryotes;05111 Biofilm formation - Vibrio cholerae [PATH:ko05111];tcpQ; toxin co-regulated pilus biosynthesis protein Q	0	0	0	0	0	0	1
K10921	Cellular community - prokaryotes;05111 Biofilm formation - Vibrio cholerae [PATH:ko05111];toxR; cholera toxin transcriptional activator	8	0	0	0	0	2	0
K07689	Cellular community - prokaryotes;05111 Biofilm formation - Vibrio cholerae [PATH:ko05111];uvrY, gacA, varA; two-component system, NarL family, invasion response regulator UvrY	102	0	7	12	4	3	4
K03606	Cellular community - prokaryotes;05111 Biofilm formation - Vibrio cholerae [PATH:ko05111];wcaJ; putative colanic acid biosysnthesis UDP-glucose lipid carrier transferase	1	48	12	1	12	94	7
K01791	Cellular community - prokaryotes;05111 Biofilm formation - Vibrio cholerae [PATH:ko05111];wecB; UDP-N-acetylglucosamine 2-epimerase (non-hydrolysing) [EC:5.1.3.14]	265	29	18	23	4	14	5
K02472	Cellular community - prokaryotes;05111 Biofilm formation - Vibrio cholerae [PATH:ko05111];wecC; UDP-N-acetyl-D-mannosaminuronic acid dehydrogenase [EC:1.1.1.336]	307	11	15	17	6	0	5
K00413	Circulatory system;04260 Cardiac muscle contraction [PATH:ko04260];CYC1, CYT1, petC; ubiquinol-cytochrome c reductase cytochrome c1 subunit	0	13	0	0	0	70	0
K00412	Circulatory system;04260 Cardiac muscle contraction [PATH:ko04260];CYTB, petB; ubiquinol-cytochrome c reductase cytochrome b subunit	0	32	0	0	0	92	0
K00411	Circulatory system;04260 Cardiac muscle contraction [PATH:ko04260];UQCRFS1, RIP1, petA; ubiquinol-cytochrome c reductase iron-sulfur subunit [EC:1.10.2.2]	0	11	0	0	0	54	0
K02183	Circulatory system;04261 Adrenergic signaling in cardiomyocytes [PATH:ko04261];CALM; calmodulin	0	0	0	0	0	1	0
K02183	Circulatory system;04270 Vascular smooth muscle contraction [PATH:ko04270];CALM; calmodulin	0	0	0	0	0	1	0
K06493	Development;04380 Osteoclast differentiation [PATH:ko04380];ITGB3, CD61; integrin beta 3	0	0	1	0	0	0	0
K02183	Digestive system;04970 Salivary secretion [PATH:ko04970];CALM; calmodulin	0	0	0	0	0	1	0
K02183	Digestive system;04971 Gastric acid secretion [PATH:ko04971];CALM; calmodulin	0	0	0	0	0	1	0
K01346	Digestive system;04972 Pancreatic secretion [PATH:ko04972];CELA2; pancreatic elastase II [EC:3.4.21.71]	0	0	4	0	0	0	0
[truncated: 3,481 more rows]

## Sheet: Normalized
KO	gene	Pantoea	Burkholderia	Enterobacter	Erwinia	Klebsiella	Pseudomonas	Serratia
K06147	ABC Transporters, Eukaryotic Type;ABCB (MDR/TAP) subfamily ABCB-BAC subgroup;ABCB-BAC; ATP-binding cassette, subfamily B, bacterial	0.195817	13.3994	0	0	0.60746	10.4965	2.83246
K11004	ABC Transporters, Eukaryotic Type;ABCB (MDR/TAP) subfamily ABCB-BAC subgroup;hlyB, cyaB; ATP-binding cassette, subfamily B, bacterial HlyB/CyaB	0.921492	0.424031	0	0	0	2.35575	0
K18895	ABC Transporters, Eukaryotic Type;ABCB (MDR/TAP) subfamily ABCB-BAC subgroup;iroC; ATP-binding cassette, subfamily B, salmochelin/enterobactin exporter	0.0460746	0	0.417455	0	0	0	0
K18889	ABC Transporters, Eukaryotic Type;ABCB (MDR/TAP) subfamily ABCB-BAC subgroup;mdlA, smdA; ATP-binding cassette, subfamily B, multidrug efflux pump	4.15823	0	3.7571	3.6395	3.0373	0.0298196	1.88831
K18890	ABC Transporters, Eukaryotic Type;ABCB (MDR/TAP) subfamily ABCB-BAC subgroup;mdlB, smdB; ATP-binding cassette, subfamily B, multidrug efflux pump	4.53835	0	3.89625	2.29863	0	0	2.36038
K11085	ABC Transporters, Eukaryotic Type;ABCB (MDR/TAP) subfamily ABCB-BAC subgroup;msbA; ATP-binding cassette, subfamily B, bacterial MsbA [EC:3.6.3.-]	4.91847	2.37457	2.92219	3.25639	1.21492	4.14492	1.41623
K13409	ABC Transporters, Eukaryotic Type;ABCB (MDR/TAP) subfamily ABCB-BAC subgroup;raxB, cvaB; ATP-binding cassette, subfamily B, bacterial RaxB	2.32677	1.86573	3.06134	3.83105	8.50443	0.0298196	16.0506
K18893	ABC Transporters, Eukaryotic Type;ABCB (MDR/TAP) subfamily ABCB-BAC subgroup;vcaM; ATP-binding cassette, subfamily B, multidrug efflux pump	4.36557	1.4417	0.139152	2.10708	0	4.05546	0.472077
K06148	ABC Transporters, Eukaryotic Type;ABCC (CFTR/MRP) subfamily ABCC-BAC subgroup;ABCC-BAC; ATP-binding cassette, subfamily C, bacterial	0	0	0	0	0	0.775309	0
K16012	ABC Transporters, Eukaryotic Type;ABCC (CFTR/MRP) subfamily ABCC-BAC subgroup;cydC; ATP-binding cassette, subfamily C, bacterial CydC	3.85875	0	3.89625	3.83105	2.42984	0	1.88831
K16014	ABC Transporters, Eukaryotic Type;ABCC (CFTR/MRP) subfamily ABCC-BAC subgroup;cydCD; ATP-binding cassette, subfamily C, bacterial CydCD	0.0230373	1.10248	0	0	0	0	0
K16013	ABC Transporters, Eukaryotic Type;ABCC (CFTR/MRP) subfamily ABCC-BAC subgroup;cydD; ATP-binding cassette, subfamily C, bacterial CydD	4.27342	0	2.64388	4.59726	1.21492	0	1.88831
K16299	ABC Transporters, Eukaryotic Type;ABCC (CFTR/MRP) subfamily ABCC-BAC subgroup;eexD; ATP-binding cassette, subfamily C, bacterial EexD	0	0	0	0	0	3.22052	0
K12536	ABC Transporters, Eukaryotic Type;ABCC (CFTR/MRP) subfamily ABCC-BAC subgroup;hasD, prtD, aprD; ATP-binding cassette, subfamily C, bacterial exporter for protease/lipase	0	0.169612	0.278303	0.383105	0	0.0894588	8.49738
K12541	ABC Transporters, Eukaryotic Type;ABCC (CFTR/MRP) subfamily ABCC-BAC subgroup;lapB; ATP-binding cassette, subfamily C, bacterial LapB	5.83996	2.88341	7.23589	3.83105	7.28952	2.41539	1.41623
K05685	ABC Transporters, Eukaryotic Type;Other subfamilies Macrolide exporter;macB; macrolide transport system ATP-binding/permease protein [EC:3.6.3.-]	0.264929	1.4417	3.89625	0.191553	1.82238	1.16296	7.08115
K02021	ABC Transporters, Eukaryotic Type;Other subfamilies Other ABC transporters;ABC.MR; putative ABC transport system ATP-binding protein	0	0	0	0	0	0.0298196	0
K02471	ABC Transporters, Eukaryotic Type;Other subfamilies Other ABC transporters;bacA; vitamin B12/bleomycin/antimicrobial peptide transport system ATP-binding/permease protein	0.460746	2.12015	0.695759	0	0	4.38348	2.83246
K06160	ABC Transporters, Eukaryotic Type;Other subfamilies Other ABC transporters;pvdE; putative pyoverdin transport system ATP-binding/permease protein	0.0575933	3.39225	0	0	0	0.775309	0.472077
K15738	ABC Transporters, Eukaryotic Type;Other subfamilies Other ABC transporters;uup; ABC transport system&#160	3.54775	2.7986	3.33964	1.34087	0.60746	3.72745	1.88831
K06159	ABC Transporters, Eukaryotic Type;Other subfamilies Other ABC transporters;yojI; multidrug/microcin transport system ATP-binding/permease protein	3.91634	0	3.47879	3.06484	0.60746	1.19278	1.88831
K01990	ABC Transporters, Prokaryotic Type;ABC-2 type and other transporters ABC-2 type transporter [MD:M00254] [OT];ABC-2.A; ABC-2 type transport system ATP-binding protein	2.34981	5.5124	6.67928	3.6395	1.21492	1.78918	8.0253
K01992	ABC Transporters, Prokaryotic Type;ABC-2 type and other transporters ABC-2 type transporter [MD:M00254] [OT];ABC-2.P; ABC-2 type transport system permease protein	2.39588	4.66434	7.93165	2.49018	4.85968	1.84881	14.6344
K09689	ABC Transporters, Prokaryotic Type;ABC-2 type and other transporters Capsular polysaccharide transporter [MD:M00249] [OT];ABC-2.CPSE.A; capsular polysaccharide transport system ATP-binding protein [EC:3.6.3.38]	0.0460746	0.593643	0.139152	0	0	0.0298196	0
K09688	ABC Transporters, Prokaryotic Type;ABC-2 type and other transporters Capsular polysaccharide transporter [MD:M00249] [OT];ABC-2.CPSE.P; capsular polysaccharide transport system permease protein	0.0691119	0.763255	0	0	0	0.0298196	0
K10107	ABC Transporters, Prokaryotic Type;ABC-2 type and other transporters Capsular polysaccharide transporter [MD:M00249] [OT];ABC-2.CPSE.P1; capsular polysaccharide transport system permease protein	0.0806306	0.678449	0	0	0	0	0
K09812	ABC Transporters, Prokaryotic Type;ABC-2 type and other transporters Cell division transporter [MD:M00256] [OT];ftsE; cell division transport system ATP-binding protein	1.62413	0	1.11321	2.10708	3.0373	2.14701	2.36038
K09811	ABC Transporters, Prokaryotic Type;ABC-2 type and other transporters Cell division transporter [MD:M00256] [OT];ftsX; cell division transport system permease protein	2.33829	0	2.22643	2.29863	0	2.8925	1.88831
K19340	ABC Transporters, Prokaryotic Type;ABC-2 type and other transporters Copper-processing transporter [MD:M00762] [OT];nosF; Cu-processing system ATP-binding protein	0	0	0	0	0	0.0298196	0
K02193	ABC Transporters, Prokaryotic Type;ABC-2 type and other transporters Heme transporter [MD:M00259] [OT];ccmA; heme exporter protein A [EC:3.6.3.41]	1.84298	0	0.278303	2.87329	0.60746	1.58044	1.41623
K02194	ABC Transporters, Prokaryotic Type;ABC-2 type and other transporters Heme transporter [MD:M00259] [OT];ccmB; heme exporter protein B	1.80843	0.0848061	0	4.21416	0.60746	1.69972	1.88831
K02195	ABC Transporters, Prokaryotic Type;ABC-2 type and other transporters Heme transporter [MD:M00259] [OT];ccmC; heme exporter protein C	2.01576	0	0.556607	2.49018	0.60746	1.90845	1.88831
K02196	ABC Transporters, Prokaryotic Type;ABC-2 type and other transporters Heme transporter [MD:M00259] [OT];ccmD; heme exporter protein D	1.2325	0	0.139152	0	0.60746	0.984047	1.88831
K09695	ABC Transporters, Prokaryotic Type;ABC-2 type and other transporters Lipooligosaccharide transporter [MD:M00252] [OT];nodI; lipooligosaccharide transport system ATP-binding protein	0	1.78093	0	0	0	0	0
K09694	ABC Transporters, Prokaryotic Type;ABC-2 type and other transporters Lipooligosaccharide transporter [MD:M00252] [OT];nodJ; lipooligosaccharide transport system permease protein	0	1.3569	0	0	0	0	0
K09691	ABC Transporters, Prokaryotic Type;ABC-2 type and other transporters Lipopolysaccharide transporter [MD:M00250] [OT];ABC-2.LPSE.A; lipopolysaccharide transport system ATP-binding protein	1.1749	1.78093	0.974062	2.87329	7.28952	2.71358	10.8578
K09690	ABC Transporters, Prokaryotic Type;ABC-2 type and other transporters Lipopolysaccharide transporter [MD:M00250] [OT];ABC-2.LPSE.P; lipopolysaccharide transport system permease protein	0.990604	1.69612	0.417455	5.36347	4.25222	2.08737	4.24869
K06861	ABC Transporters, Prokaryotic Type;ABC-2 type and other transporters Lipopolysaccharide transporter [MD:M00320];lptB; lipopolysaccharide export system ATP-binding protein [EC:3.6.3.-]	1.5435	1.4417	2.08728	2.87329	1.21492	1.2226	1.88831
K07091	ABC Transporters, Prokaryotic Type;ABC-2 type and other transporters Lipopolysaccharide transporter [MD:M00320];lptF; lipopolysaccharide export system permease protein	3.04092	1.18729	2.08728	4.0226	0.60746	2.02773	4.24869
K11720	ABC Transporters, Prokaryotic Type;ABC-2 type and other transporters Lipopolysaccharide transporter [MD:M00320];lptG; lipopolysaccharide export system permease protein	3.25978	1.61132	2.08728	5.17192	2.42984	2.62412	4.72077
K09808	ABC Transporters, Prokaryotic Type;ABC-2 type and other transporters Lipoprotein-releasing transporter [MD:M00255] [OT];lolC_E; lipoprotein-releasing system permease protein	5.20643	2.37457	4.87031	6.51279	1.82238	5.45699	4.72077
K09810	ABC Transporters, Prokaryotic Type;ABC-2 type and other transporters Lipoprotein-releasing transporter [MD:M00255] [OT];lolD; lipoprotein-releasing system ATP-binding protein [EC:3.6.3.-]	1.63565	2.54418	1.94812	1.91553	0	1.84881	2.36038
K09013	ABC Transporters, Prokaryotic Type;ABC-2 type and other transporters Orphan ABC ATPase;sufC; Fe-S cluster assembly ATP-binding protein	1.7278	0	1.66982	0.957763	0.60746	0	1.88831
K02003	ABC Transporters, Prokaryotic Type;ABC-2 type and other transporters Putative ABC transporter [MD:M00258];ABC.CD.A; putative ABC transport system ATP-binding protein	1.84298	2.28977	2.92219	2.68174	1.21492	6.11302	2.36038
K02004	ABC Transporters, Prokaryotic Type;ABC-2 type and other transporters Putative ABC transporter [MD:M00258];ABC.CD.P; putative ABC transport system permease protein	4.96454	6.61488	6.26183	4.78881	2.42984	12.5839	2.36038
K09693	ABC Transporters, Prokaryotic Type;ABC-2 type and other transporters Teichoic acid transporter [MD:M00251];tagH; teichoic acid transport system ATP-binding protein [EC:3.6.3.40]	0	0	0	0	0	0	0.472077
K16784	ABC Transporters, Prokaryotic Type;Metallic cation, iron-siderophore and vitamin B12 transporters Biotin transporter [MD:M00581] [OT];bioM; biotin transport system ATP-binding protein [EC:3.6.3.-]	0	0	0	0.574658	0	0	0
K02007	ABC Transporters, Prokaryotic Type;Metallic cation, iron-siderophore and vitamin B12 transporters Cobalt transporter [MD:M00245] [OT];cbiM; cobalt/nickel transport system permease protein	0	0	0.417455	0	0	0	0
K02009	ABC Transporters, Prokaryotic Type;Metallic cation, iron-siderophore and vitamin B12 transporters Cobalt transporter [MD:M00245] [OT];cbiN; cobalt/nickel transport protein	0	0	0.278303	0	0	0.0298196	0
K02006	ABC Transporters, Prokaryotic Type;Metallic cation, iron-siderophore and vitamin B12 transporters Cobalt transporter [MD:M00245] [OT];cbiO; cobalt/nickel transport system ATP-binding protein	0	0	0.556607	0	0	0	0
K02008	ABC Transporters, Prokaryotic Type;Metallic cation, iron-siderophore and vitamin B12 transporters Cobalt transporter [MD:M00245] [OT];cbiQ; cobalt/nickel transport system permease protein	0	0	0.83491	0	0	0	0
K02013	ABC Transporters, Prokaryotic Type;Metallic cation, iron-siderophore and vitamin B12 transporters Iron complex transporter [MD:M00240];ABC.FEV.A; iron complex transport system ATP-binding protein [EC:3.6.3.34]	9.90604	6.8693	10.0189	7.47055	13.9716	8.43894	13.6902
K02015	ABC Transporters, Prokaryotic Type;Metallic cation, iron-siderophore and vitamin B12 transporters Iron complex transporter [MD:M00240];ABC.FEV.P; iron complex transport system permease protein	17.4738	7.80216	17.2548	8.23676	25.5133	15.5658	15.1065
K02016	ABC Transporters, Prokaryotic Type;Metallic cation, iron-siderophore and vitamin B12 transporters Iron complex transporter [MD:M00240];ABC.FEV.S; iron complex transport system substrate-binding protein	17.2319	5.5124	15.0284	19.9215	12.1492	8.76696	17.9389
K11604	ABC Transporters, Prokaryotic Type;Metallic cation, iron-siderophore and vitamin B12 transporters Manganese/iron transporter [MD:M00317] [OT];sitA; manganese/iron transport system substrate-binding protein	1.81995	0	0.556607	0.191553	0	1.72954	2.36038
K11607	ABC Transporters, Prokaryotic Type;Metallic cation, iron-siderophore and vitamin B12 transporters Manganese/iron transporter [MD:M00317] [OT];sitB; manganese/iron transport system ATP-binding protein	1.61261	0	0.695759	0.191553	0	1.58044	1.88831
K11605	ABC Transporters, Prokaryotic Type;Metallic cation, iron-siderophore and vitamin B12 transporters Manganese/iron transporter [MD:M00317] [OT];sitC; manganese/iron transport system permease protein	1.71628	0	0.83491	0	0	1.819	1.41623
K11606	ABC Transporters, Prokaryotic Type;Metallic cation, iron-siderophore and vitamin B12 transporters Manganese/iron transporter [MD:M00317] [OT];sitD; manganese/iron transport system permease protein	1.40528	0	0.83491	0	0	1.96809	1.41623
K02007	ABC Transporters, Prokaryotic Type;Metallic cation, iron-siderophore and vitamin B12 transporters Nickel transporter [MD:M00246] [OT];cbiM; cobalt/nickel transport system permease protein	0	0	0.417455	0	0	0	0
K02009	ABC Transporters, Prokaryotic Type;Metallic cation, iron-siderophore and vitamin B12 transporters Nickel transporter [MD:M00246] [OT];cbiN; cobalt/nickel transport protein	0	0	0.278303	0	0	0.0298196	0
K02006	ABC Transporters, Prokaryotic Type;Metallic cation, iron-siderophore and vitamin B12 transporters Nickel transporter [MD:M00246] [OT];cbiO; cobalt/nickel transport system ATP-binding protein	0	0	0.556607	0	0	0	0
K02008	ABC Transporters, Prokaryotic Type;Metallic cation, iron-siderophore and vitamin B12 transporters Nickel transporter [MD:M00246] [OT];cbiQ; cobalt/nickel transport system permease protein	0	0	0.83491	0	0	0	0
K05833	ABC Transporters, Prokaryotic Type;Metallic cation, iron-siderophore and vitamin B12 transporters Putative ABC transporter [MD:M00247] [OT];ABC.X4.A; putative ABC transport system ATP-binding protein	0	1.27209	0	0	0	0	0
K05832	ABC Transporters, Prokaryotic Type;Metallic cation, iron-siderophore and vitamin B12 transporters Putative ABC transporter [MD:M00247] [OT];ABC.X4.P; putative ABC transport system permease protein	0	0.763255	0	0	0	0	0
K01989	ABC Transporters, Prokaryotic Type;Metallic cation, iron-siderophore and vitamin B12 transporters Putative ABC transporter [MD:M00247] [OT];ABC.X4.S; putative ABC transport system substrate-binding protein	0	1.18729	0	0	0	0	0
K02074	ABC Transporters, Prokaryotic Type;Metallic cation, iron-siderophore and vitamin B12 transporters Putative zinc/manganese transporter [MD:M00244];ABC.ZM.A; zinc/manganese transport system ATP-binding protein	1.84298	2.20496	1.53067	2.49018	3.64476	1.78918	1.41623
K02075	ABC Transporters, Prokaryotic Type;Metallic cation, iron-siderophore and vitamin B12 transporters Putative zinc/manganese transporter [MD:M00244];ABC.ZM.P; zinc/manganese transport system permease protein	2.20006	1.4417	1.80897	3.6395	2.42984	1.69972	3.30454
K02077	ABC Transporters, Prokaryotic Type;Metallic cation, iron-siderophore and vitamin B12 transporters Putative zinc/manganese transporter [MD:M00244];ABC.ZM.S; zinc/manganese transport system substrate-binding protein	2.5341	2.62899	2.92219	2.10708	0	2.05755	2.36038
K06074	ABC Transporters, Prokaryotic Type;Metallic cation, iron-siderophore and vitamin B12 transporters Vitamin B12 transporter [MD:M00241] [OT];ABC.VB12.A, btuD; vitamin B12 transport system ATP-binding protein [EC:3.6.3.33]	2.18854	0	1.80897	1.91553	0.60746	0	1.88831
K06073	ABC Transporters, Prokaryotic Type;Metallic cation, iron-siderophore and vitamin B12 transporters Vitamin B12 transporter [MD:M00241] [OT];ABC.VB12.P, btuC; vitamin B12 transport system permease protein	2.23462	0	1.53067	1.91553	1.82238	0	2.36038
K06858	ABC Transporters, Prokaryotic Type;Metallic cation, iron-siderophore and vitamin B12 transporters Vitamin B12 transporter [MD:M00241] [OT];ABC.VB12.S1, btuF; vitamin B12 transport system substrate-binding protein	2.15399	0	1.39152	2.29863	0.60746	0.268376	1.88831
K09815	ABC Transporters, Prokaryotic Type;Metallic cation, iron-siderophore and vitamin B12 transporters Zinc transporter [MD:M00242] [OT];znuA; zinc transport system substrate-binding protein	2.0964	0	1.80897	2.29863	3.64476	2.26629	1.41623
K09816	ABC Transporters, Prokaryotic Type;Metallic cation, iron-siderophore and vitamin B12 transporters Zinc transporter [MD:M00242] [OT];znuB; zinc transport system permease protein	2.29221	0	1.53067	3.06484	0	2.17683	1.88831
K09817	ABC Transporters, Prokaryotic Type;Metallic cation, iron-siderophore and vitamin B12 transporters Zinc transporter [MD:M00242] [OT];znuC; zinc transport system ATP-binding protein [EC:3.6.3.-]	1.80843	0	2.08728	1.91553	0	2.14701	1.41623
K11081	ABC Transporters, Prokaryotic Type;Mineral and organic ion transporters 2-Aminoethylphosphonate transporter [MD:M00302] [OT];phnS; 2-aminoethylphosphonate transport system substrate-binding protein	0	0.678449	0	0	0	0	1.88831
K11084	ABC Transporters, Prokaryotic Type;Mineral and organic ion transporters 2-Aminoethylphosphonate transporter [MD:M00302] [OT];phnT; 2-aminoethylphosphonate transport system ATP-binding protein	0	1.18729	0	0	0	0	2.83246
K11083	ABC Transporters, Prokaryotic Type;Mineral and organic ion transporters 2-Aminoethylphosphonate transporter [MD:M00302] [OT];phnU; 2-aminoethylphosphonate transport system permease protein	0	1.4417	0	0	0	0	1.41623
K11082	ABC Transporters, Prokaryotic Type;Mineral and organic ion transporters 2-Aminoethylphosphonate transporter [MD:M00302] [OT];phnV; 2-aminoethylphosphonate transport system permease protein	0	1.61132	0.139152	0	0.60746	0	1.41623
K02000	ABC Transporters, Prokaryotic Type;Mineral and organic ion transporters Glycine betaine/proline transporter [MD:M00208] [OT];proV; glycine betaine/proline transport system ATP-binding protein [EC:3.6.3.32]	0.552895	3.13783	2.22643	3.06484	0	6.64977	1.88831
K02001	ABC Transporters, Prokaryotic Type;Mineral and organic ion transporters Glycine betaine/proline transporter [MD:M00208] [OT];proW; glycine betaine/proline transport system permease protein	0.541377	3.39225	3.20049	2.68174	0.60746	5.45699	1.41623
K02002	ABC Transporters, Prokaryotic Type;Mineral and organic ion transporters Glycine betaine/proline transporter [MD:M00208] [OT];proX; glycine betaine/proline transport system substrate-binding protein	0.564414	9.92232	2.50473	2.49018	1.82238	18.6372	1.41623
K02012	ABC Transporters, Prokaryotic Type;Mineral and organic ion transporters Iron(III) transporter [MD:M00190] [OT];afuA, fbpA; iron(III) transport system substrate-binding protein	2.94878	4.66434	5.00946	0.957763	6.0746	1.16296	4.72077
K02011	ABC Transporters, Prokaryotic Type;Mineral and organic ion transporters Iron(III) transporter [MD:M00190] [OT];afuB, fbpB; iron(III) transport system permease protein	4.88391	6.61488	6.95759	0.957763	7.28952	1.69972	7.08115
K02010	ABC Transporters, Prokaryotic Type;Mineral and organic ion transporters Iron(III) transporter [MD:M00190] [OT];afuC, fbpC; iron(III) transport system ATP-binding protein [EC:3.6.3.30]	3.40952	4.32511	4.3137	0.574658	2.42984	0.864768	5.19284
K02020	ABC Transporters, Prokaryotic Type;Mineral and organic ion transporters Molybdate transporter [MD:M00189] [OT];modA; molybdate transport system substrate-binding protein	6.12792	3.64666	3.47879	5.74658	2.42984	4.5624	9.44153
K02018	ABC Transporters, Prokaryotic Type;Mineral and organic ion transporters Molybdate transporter [MD:M00189] [OT];modB; molybdate transport system permease protein	1.96969	2.62899	2.36558	2.49018	0	1.93827	1.88831
K02017	ABC Transporters, Prokaryotic Type;Mineral and organic ion transporters Molybdate transporter [MD:M00189] [OT];modC; molybdate transport system ATP-binding protein [EC:3.6.3.29]	2.67233	1.27209	2.50473	3.25639	3.0373	2.50485	1.88831
K05776	ABC Transporters, Prokaryotic Type;Mineral and organic ion transporters Molybdate transporter [MD:M00189] [OT];modF; molybdate transport system ATP-binding protein	3.63989	0	2.64388	2.68174	1.82238	0	2.83246
K15495	ABC Transporters, Prokaryotic Type;Mineral and organic ion transporters Molybdate/tungstate transporter [MD:M00423];wtpA; molybdate/tungstate transport system substrate-binding protein	0.449228	1.01767	0.278303	1.34087	1.82238	0.0298196	0
K15496	ABC Transporters, Prokaryotic Type;Mineral and organic ion transporters Molybdate/tungstate transporter [MD:M00423];wtpB; molybdate/tungstate transport system permease protein	0.311004	0	0.278303	0.574658	0	0.149098	0
K15576	ABC Transporters, Prokaryotic Type;Mineral and organic ion transporters Nitrate/nitrite transporter [MD:M00438] [OT];nrtA, nasF, cynA; nitrate/nitrite transport system substrate-binding protein	2.79903	1.4417	1.25237	0.574658	2.42984	5.21843	0
K15577	ABC Transporters, Prokaryotic Type;Mineral and organic ion transporters Nitrate/nitrite transporter [MD:M00438] [OT];nrtB, nasE, cynB; nitrate/nitrite transport system permease protein	1.98121	0	1.11321	0	1.82238	2.23647	0
K15578	ABC Transporters, Prokaryotic Type;Mineral and organic ion transporters Nitrate/nitrite transporter [MD:M00438] [OT];nrtC, nasD; nitrate/nitrite transport system ATP-binding protein [EC:3.6.3.-]	1.88906	0	0.974062	0.383105	4.25222	1.78918	0.472077
K02049	ABC Transporters, Prokaryotic Type;Mineral and organic ion transporters NitT/TauT family transporter [MD:M00188];ABC.SN.A; NitT/TauT family transport system ATP-binding protein	4.61898	9.32867	1.94812	0.574658	8.50443	7.75309	7.55323
K02050	ABC Transporters, Prokaryotic Type;Mineral and organic ion transporters NitT/TauT family transporter [MD:M00188];ABC.SN.P; NitT/TauT family transport system permease protein	3.98545	12.8057	1.11321	1.34087	9.71935	8.20039	4.24869
K02051	ABC Transporters, Prokaryotic Type;Mineral and organic ion transporters NitT/TauT family transporter [MD:M00188];ABC.SN.S; NitT/TauT family transport system substrate-binding protein	3.28282	9.32867	1.25237	1.53242	8.50443	10.2579	8.49738
K05847	ABC Transporters, Prokaryotic Type;Mineral and organic ion transporters Osmoprotectant transporter [MD:M00209];opuA; osmoprotectant transport system ATP-binding protein	4.30798	2.12015	3.7571	2.29863	1.21492	2.98196	3.30454
K05846	ABC Transporters, Prokaryotic Type;Mineral and organic ion transporters Osmoprotectant transporter [MD:M00209];opuBD; osmoprotectant transport system permease protein	8.38558	4.49473	7.51419	4.59726	9.71935	3.51871	7.08115
K05845	ABC Transporters, Prokaryotic Type;Mineral and organic ion transporters Osmoprotectant transporter [MD:M00209];opuC; osmoprotectant transport system substrate-binding protein	4.33101	2.12015	3.61795	0.957763	4.25222	2.38557	3.77661
K15599	ABC Transporters, Prokaryotic Type;Mineral and organic ion transporters Putative hydroxymethylpyrimidine transporter [MD:M00442];thiX; putative hydroxymethylpyrimidine transport system permease protein	1.1749	0	0.278303	0.574658	1.21492	0	4.72077
K15598	ABC Transporters, Prokaryotic Type;Mineral and organic ion transporters Putative hydroxymethylpyrimidine transporter [MD:M00442];thiY; putative hydroxymethylpyrimidine transport system substrate-binding protein	1.12883	0	0.556607	0.191553	0.60746	0	3.77661
K15600	ABC Transporters, Prokaryotic Type;Mineral and organic ion transporters Putative hydroxymethylpyrimidine transporter [MD:M00442];thiZ; putative hydroxymethylpyrimidine transport system ATP-binding protein	0.875418	0	0.278303	0.76621	0.60746	0	2.36038
K02052	ABC Transporters, Prokaryotic Type;Mineral and organic ion transporters Putative spermidine/putrescine transporter [MD:M00193];ABC.SP.A; putative spermidine/putrescine transport system ATP-binding protein	4.02001	11.2792	1.94812	1.53242	0	7.78291	3.77661
K02053	ABC Transporters, Prokaryotic Type;Mineral and organic ion transporters Putative spermidine/putrescine transporter [MD:M00193];ABC.SP.P; putative spermidine/putrescine transport system permease protein	6.92271	9.92232	1.53067	0.76621	0	8.49858	2.83246
K02054	ABC Transporters, Prokaryotic Type;Mineral and organic ion transporters Putative spermidine/putrescine transporter [MD:M00193];ABC.SP.P1; putative spermidine/putrescine transport system permease protein	4.06608	7.37813	1.53067	1.53242	0.60746	6.38139	3.77661
K02055	ABC Transporters, Prokaryotic Type;Mineral and organic ion transporters Putative spermidine/putrescine transporter [MD:M00193];ABC.SP.S; putative spermidine/putrescine transport system substrate-binding protein	7.76357	13.4842	2.22643	1.53242	0	10.0194	3.77661
K05779	ABC Transporters, Prokaryotic Type;Mineral and organic ion transporters Putative thiamine transporter [MD:M00192] [OT];ABC.VB1X.A; putative thiamine transport system ATP-binding protein	0	0	1.53067	0	0	0	0
K05778	ABC Transporters, Prokaryotic Type;Mineral and organic ion transporters Putative thiamine transporter [MD:M00192] [OT];ABC.VB1X.P; putative thiamine transport system permease protein	0	0	1.66982	0	0	0	0
K05777	ABC Transporters, Prokaryotic Type;Mineral and organic ion transporters Putative thiamine transporter [MD:M00192] [OT];ABC.VB1X.S; putative thiamine transport system substrate-binding protein	0	0	1.11321	0	1.21492	0	0
K11073	ABC Transporters, Prokaryotic Type;Mineral and organic ion transporters Putrescine transporter [MD:M00300] [OT];potF; putrescine transport system substrate-binding protein	2.51107	4.32511	2.50473	2.49018	1.21492	7.78291	2.36038
K11076	ABC Transporters, Prokaryotic Type;Mineral and organic ion transporters Putrescine transporter [MD:M00300] [OT];potG; putrescine transport system ATP-binding protein	2.32677	4.57953	3.33964	3.06484	0.60746	2.23647	1.88831
K11075	ABC Transporters, Prokaryotic Type;Mineral and organic ion transporters Putrescine transporter [MD:M00300] [OT];potH; putrescine transport system permease protein	1.88906	4.32511	1.80897	2.29863	3.0373	2.32593	1.88831
K11074	ABC Transporters, Prokaryotic Type;Mineral and organic ion transporters Putrescine transporter [MD:M00300] [OT];potI; putrescine transport system permease protein	2.0388	4.57953	2.92219	3.06484	0	2.35575	1.88831
K11072	ABC Transporters, Prokaryotic Type;Mineral and organic ion transporters Spermidine/putrescine transporter [MD:M00299] [OT];potA; spermidine/putrescine transport system ATP-binding protein [EC:3.6.3.31]	0.863899	0	1.53067	0.191553	4.25222	0.0298196	1.88831
K11071	ABC Transporters, Prokaryotic Type;Mineral and organic ion transporters Spermidine/putrescine transporter [MD:M00299] [OT];potB; spermidine/putrescine transport system permease protein	0.587451	0.254418	1.80897	0	3.0373	0	1.88831
K11070	ABC Transporters, Prokaryotic Type;Mineral and organic ion transporters Spermidine/putrescine transporter [MD:M00299] [OT];potC; spermidine/putrescine transport system permease protein	0.760231	0.339225	1.66982	0.191553	3.64476	0.0298196	1.88831
K11069	ABC Transporters, Prokaryotic Type;Mineral and organic ion transporters Spermidine/putrescine transporter [MD:M00299] [OT];potD; spermidine/putrescine transport system substrate-binding protein	0.77175	0.339225	2.50473	0	0.60746	1.6699	2.36038
K02045	ABC Transporters, Prokaryotic Type;Mineral and organic ion transporters Sulfate transporter [MD:M00185] [OT];cysA; sulfate transport system ATP-binding protein [EC:3.6.3.25]	2.81055	2.03535	1.66982	2.87329	1.21492	2.32593	1.88831
K02048	ABC Transporters, Prokaryotic Type;Mineral and organic ion transporters Sulfate transporter [MD:M00185] [OT];cysP, sbp; sulfate transport system substrate-binding protein	5.4944	3.81628	5.28777	6.12968	4.25222	4.02564	3.77661
K02046	ABC Transporters, Prokaryotic Type;Mineral and organic ion transporters Sulfate transporter [MD:M00185] [OT];cysU; sulfate transport system permease protein	2.02728	1.4417	0.974062	3.25639	3.64476	1.75936	1.88831
K02047	ABC Transporters, Prokaryotic Type;Mineral and organic ion transporters Sulfate transporter [MD:M00185] [OT];cysW; sulfate transport system permease protein	1.96969	1.86573	2.50473	3.6395	0	2.02773	2.36038
K15553	ABC Transporters, Prokaryotic Type;Mineral and organic ion transporters Sulfonate transporter [MD:M00436];ssuA; sulfonate transport system substrate-binding protein	7.41801	12.1273	2.22643	11.11	6.0746	11.9577	8.96946
K15555	ABC Transporters, Prokaryotic Type;Mineral and organic ion transporters Sulfonate transporter [MD:M00436];ssuB; sulfonate transport system ATP-binding protein [EC:3.6.3.-]	2.11943	3.56186	2.08728	2.68174	2.42984	3.07142	6.137
K15554	ABC Transporters, Prokaryotic Type;Mineral and organic ion transporters Sulfonate transporter [MD:M00436];ssuC; sulfonate transport system permease protein	0.34556	4.91876	1.39152	4.21416	6.68206	3.93619	2.36038
K15551	ABC Transporters, Prokaryotic Type;Mineral and organic ion transporters Taurine transporter [MD:M00435] [OT];tauA; taurine transport system substrate-binding protein	2.96029	0.932867	1.80897	2.49018	0	2.32593	1.41623
K10831	ABC Transporters, Prokaryotic Type;Mineral and organic ion transporters Taurine transporter [MD:M00435] [OT];tauB; taurine transport system ATP-binding protein [EC:3.6.3.36]	2.16551	1.3569	1.53067	2.49018	0	1.40152	1.41623
K15552	ABC Transporters, Prokaryotic Type;Mineral and organic ion transporters Taurine transporter [MD:M00435] [OT];tauC; taurine transport system permease protein	2.34981	1.69612	1.53067	3.25639	0.60746	1.64008	1.88831
K02064	ABC Transporters, Prokaryotic Type;Mineral and organic ion transporters Thiamine transporter [MD:M00191] [OT];thiB, tbpA; thiamine transport system substrate-binding protein	2.63777	0	2.50473	2.49018	1.21492	0	2.83246
K02063	ABC Transporters, Prokaryotic Type;Mineral and organic ion transporters Thiamine transporter [MD:M00191] [OT];thiP; thiamine transport system permease protein	3.69749	0	2.92219	3.44795	3.0373	0	2.36038
K02062	ABC Transporters, Prokaryotic Type;Mineral and organic ion transporters Thiamine transporter [MD:M00191] [OT];thiQ; thiamine transport system ATP-binding protein	1.95817	0	2.22643	2.49018	1.21492	0	1.88831
K19226	ABC Transporters, Prokaryotic Type;Peptide and nickel transporters Cationic peptide transporter [MD:M00739] [OT];sapA; cationic peptide transport system substrate-binding protein	3.40952	0	1.80897	3.25639	1.82238	0	2.83246
K19227	ABC Transporters, Prokaryotic Type;Peptide and nickel transporters Cationic peptide transporter [MD:M00739] [OT];sapB; cationic peptide transport system permease protein	2.4074	0	1.94812	3.44795	0.60746	0	1.88831
K19228	ABC Transporters, Prokaryotic Type;Peptide and nickel transporters Cationic peptide transporter [MD:M00739] [OT];sapC; cationic peptide transport system permease protein	1.99273	0	1.80897	2.10708	1.82238	0	2.83246
K19229	ABC Transporters, Prokaryotic Type;Peptide and nickel transporters Cationic peptide transporter [MD:M00739] [OT];sapD; cationic peptide transport system ATP-binding protein	2.30373	0	1.66982	2.49018	0	0	2.36038
K19230	ABC Transporters, Prokaryotic Type;Peptide and nickel transporters Cationic peptide transporter [MD:M00739] [OT];sapF; cationic peptide transport system ATP-binding protein	1.95817	0	1.66982	2.29863	0.60746	0	1.41623
K12368	ABC Transporters, Prokaryotic Type;Peptide and nickel transporters Dipeptide transporter [MD:M00324] [OT];dppA; dipeptide transport system substrate-binding protein	6.71538	6.53007	5.00946	6.12968	8.50443	7.604	6.137
K12369	ABC Transporters, Prokaryotic Type;Peptide and nickel transporters Dipeptide transporter [MD:M00324] [OT];dppB; dipeptide transport system permease protein	2.2231	0.848061	0.83491	3.06484	2.42984	2.8925	1.41623
K12370	ABC Transporters, Prokaryotic Type;Peptide and nickel transporters Dipeptide transporter [MD:M00324] [OT];dppC; dipeptide transport system permease protein	2.01576	1.86573	1.53067	2.29863	3.0373	1.75936	1.41623
K12371	ABC Transporters, Prokaryotic Type;Peptide and nickel transporters Dipeptide transporter [MD:M00324] [OT];dppD; dipeptide transport system ATP-binding protein	2.38436	1.18729	1.94812	2.49018	2.42984	2.47503	1.41623
K12372	ABC Transporters, Prokaryotic Type;Peptide and nickel transporters Dipeptide transporter [MD:M00324] [OT];dppF; dipeptide transport system ATP-binding protein	2.54562	2.03535	1.94812	3.25639	1.82238	2.26629	1.88831
K13892	ABC Transporters, Prokaryotic Type;Peptide and nickel transporters Glutathione transporter [MD:M00348] [OT];gsiA; glutathione transport system ATP-binding protein	6.24311	2.7986	17.6723	2.68174	1.21492	0	1.88831
K13889	ABC Transporters, Prokaryotic Type;Peptide and nickel transporters Glutathione transporter [MD:M00348] [OT];gsiB; glutathione transport system substrate-binding protein	4.90695	1.86573	3.61795	4.59726	68.6429	0	3.77661
K13890	ABC Transporters, Prokaryotic Type;Peptide and nickel transporters Glutathione transporter [MD:M00348] [OT];gsiC; glutathione transport system permease protein	3.01789	1.86573	14.7501	2.68174	1.82238	0	2.36038
K13891	ABC Transporters, Prokaryotic Type;Peptide and nickel transporters Glutathione transporter [MD:M00348] [OT];gsiD; glutathione transport system permease protein	3.87027	1.27209	2.64388	2.29863	1.82238	0	2.36038
K13893	ABC Transporters, Prokaryotic Type;Peptide and nickel transporters Microcin C transporter [MD:M00349] [OT];yejA; microcin C transport system substrate-binding protein	3.69749	4.57953	3.33964	3.6395	0.60746	2.50485	2.83246
K13894	ABC Transporters, Prokaryotic Type;Peptide and nickel transporters Microcin C transporter [MD:M00349] [OT];yejB; microcin C transport system permease protein	2.41892	3.05302	1.53067	2.68174	3.0373	1.64008	2.36038
K13895	ABC Transporters, Prokaryotic Type;Peptide and nickel transporters Microcin C transporter [MD:M00349] [OT];yejE; microcin C transport system permease protein	2.29221	3.05302	2.36558	3.06484	2.42984	1.19278	1.41623
K13896	ABC Transporters, Prokaryotic Type;Peptide and nickel transporters Microcin C transporter [MD:M00349] [OT];yejF; microcin C transport system ATP-binding protein	3.55926	3.47705	3.7571	3.6395	3.0373	1.19278	1.41623
K15584	ABC Transporters, Prokaryotic Type;Peptide and nickel transporters Nickel transporter [MD:M00440] [OT];nikA; nickel transport system substrate-binding protein	0	0	1.80897	0	2.42984	0	0
K15585	ABC Transporters, Prokaryotic Type;Peptide and nickel transporters Nickel transporter [MD:M00440] [OT];nikB; nickel transport system permease protein	0	0	1.39152	0	1.82238	0.0298196	0
K15586	ABC Transporters, Prokaryotic Type;Peptide and nickel transporters Nickel transporter [MD:M00440] [OT];nikC; nickel transport system permease protein	0	0	0.974062	0	3.0373	0	0
K15587	ABC Transporters, Prokaryotic Type;Peptide and nickel transporters Nickel transporter [MD:M00440] [OT];nikD; nickel transport system ATP-binding protein [EC:3.6.3.24]	0	0	0.695759	0	1.21492	0	0
K10824	ABC Transporters, Prokaryotic Type;Peptide and nickel transporters Nickel transporter [MD:M00440] [OT];nikE; nickel transport system ATP-binding protein [EC:3.6.3.24]	0	0	0.695759	0	1.21492	0	0
K15580	ABC Transporters, Prokaryotic Type;Peptide and nickel transporters Oligopeptide transporter [MD:M00439];oppA, mppA; oligopeptide transport system substrate-binding protein	12.0485	1.78093	9.60147	11.6847	1.82238	0	9.44153
K15581	ABC Transporters, Prokaryotic Type;Peptide and nickel transporters Oligopeptide transporter [MD:M00439];oppB; oligopeptide transport system permease protein	1.78539	1.95054	1.94812	2.49018	0	0	2.36038
K15582	ABC Transporters, Prokaryotic Type;Peptide and nickel transporters Oligopeptide transporter [MD:M00439];oppC; oligopeptide transport system permease protein	2.10791	1.4417	2.22643	1.91553	0	0	1.41623
K15583	ABC Transporters, Prokaryotic Type;Peptide and nickel transporters Oligopeptide transporter [MD:M00439];oppD; oligopeptide transport system ATP-binding protein	1.79691	1.69612	2.36558	1.34087	0	0	2.36038
K10823	ABC Transporters, Prokaryotic Type;Peptide and nickel transporters Oligopeptide transporter [MD:M00439];oppF; oligopeptide transport system ATP-binding protein	2.37284	1.78093	1.66982	2.49018	0.60746	0	2.36038
K02031	ABC Transporters, Prokaryotic Type;Peptide and nickel transporters Peptides/nickel transporter [MD:M00239];ABC.PE.A; peptide/nickel transport system ATP-binding protein	4.7572	1.01767	7.93165	4.40571	10.3268	4.74132	4.72077
K02032	ABC Transporters, Prokaryotic Type;Peptide and nickel transporters Peptides/nickel transporter [MD:M00239];ABC.PE.A1; peptide/nickel transport system ATP-binding protein	12.7742	6.19085	9.74062	13.7918	15.7939	12.2857	4.72077
K02033	ABC Transporters, Prokaryotic Type;Peptide and nickel transporters Peptides/nickel transporter [MD:M00239];ABC.PE.P; peptide/nickel transport system permease protein	10.7469	6.10604	10.2972	10.5354	12.1492	9.12479	5.19284
K02034	ABC Transporters, Prokaryotic Type;Peptide and nickel transporters Peptides/nickel transporter [MD:M00239];ABC.PE.P1; peptide/nickel transport system permease protein	9.4453	4.32511	8.3491	11.11	10.3268	9.30371	7.08115
K02035	ABC Transporters, Prokaryotic Type;Peptide and nickel transporters Peptides/nickel transporter [MD:M00239];ABC.PE.S; peptide/nickel transport system substrate-binding protein	20.2037	9.83751	15.0284	18.0059	21.2611	17.1164	8.96946
K09997	ABC Transporters, Prokaryotic Type;Phosphate and amino acid transporters Arginine transporter [MD:M00229] [OT];artI; arginine transport system substrate-binding protein	1.86602	0	2.50473	2.10708	0	0	1.41623
K09996	ABC Transporters, Prokaryotic Type;Phosphate and amino acid transporters Arginine transporter [MD:M00229] [OT];artJ; arginine transport system substrate-binding protein	1.99273	0	3.20049	1.91553	1.21492	0	1.88831
K09998	ABC Transporters, Prokaryotic Type;Phosphate and amino acid transporters Arginine transporter [MD:M00229] [OT];artM; arginine transport system permease protein	2.31525	0	1.66982	1.53242	0	0	1.41623
K10000	ABC Transporters, Prokaryotic Type;Phosphate and amino acid transporters Arginine transporter [MD:M00229] [OT];artP; arginine transport system ATP-binding protein [EC:3.6.3.-]	1.84298	0	2.50473	0.957763	0	0	1.41623
K09999	ABC Transporters, Prokaryotic Type;Phosphate and amino acid transporters Arginine transporter [MD:M00229] [OT];artQ; arginine transport system permease protein	1.65869	0	1.80897	1.72397	3.0373	0	1.41623
K10022	ABC Transporters, Prokaryotic Type;Phosphate and amino acid transporters Arginine/ornithine transporter [MD:M00235];aotJ; arginine/ornithine transport system substrate-binding protein	0	0	0	0	0	0.387655	0
K10023	ABC Transporters, Prokaryotic Type;Phosphate and amino acid transporters Arginine/ornithine transporter [MD:M00235];aotM; arginine/ornithine transport system permease protein	0	0	0	0	0	0.0894588	0
K10025	ABC Transporters, Prokaryotic Type;Phosphate and amino acid transporters Arginine/ornithine transporter [MD:M00235];aotP; arginine/ornithine transport system ATP-binding protein [EC:3.6.3.-]	0	0	0	0	0	0.506933	0
K10024	ABC Transporters, Prokaryotic Type;Phosphate and amino acid transporters Arginine/ornithine transporter [MD:M00235];aotQ; arginine/ornithine transport system permease protein	0.0115187	0	0	0	0	0.268376	0
K01996	ABC Transporters, Prokaryotic Type;Phosphate and amino acid transporters Branched-chain amino acid transporter [MD:M00237] [OT];livF; branched-chain amino acid transport system ATP-binding protein	2.51107	10.2615	6.95759	2.10708	3.0373	5.36753	6.137
K01995	ABC Transporters, Prokaryotic Type;Phosphate and amino acid transporters Branched-chain amino acid transporter [MD:M00237] [OT];livG; branched-chain amino acid transport system ATP-binding protein	2.25766	7.63255	4.3137	2.49018	4.85968	5.75518	4.24869
K01997	ABC Transporters, Prokaryotic Type;Phosphate and amino acid transporters Branched-chain amino acid transporter [MD:M00237] [OT];livH; branched-chain amino acid transport system permease protein	2.31525	8.65023	3.61795	3.44795	12.1492	6.14284	5.66492
K01999	ABC Transporters, Prokaryotic Type;Phosphate and amino acid transporters Branched-chain amino acid transporter [MD:M00237] [OT];livK; branched-chain amino acid transport system substrate-binding protein	4.14672	26.3747	9.74062	2.68174	15.1865	7.1567	5.19284
K01998	ABC Transporters, Prokaryotic Type;Phosphate and amino acid transporters Branched-chain amino acid transporter [MD:M00237] [OT];livM; branched-chain amino acid transport system permease protein	3.80116	10.94	7.37504	3.06484	5.46714	7.33562	5.66492
K10010	ABC Transporters, Prokaryotic Type;Phosphate and amino acid transporters Cystine transporter [MD:M00234] [OT];ABC.CYST.A; cystine transport system ATP-binding protein [EC:3.6.3.-]	2.29221	0.932867	1.80897	1.34087	0	1.72954	1.88831
K10009	ABC Transporters, Prokaryotic Type;Phosphate and amino acid transporters Cystine transporter [MD:M00234] [OT];ABC.CYST.P; cystine transport system permease protein	1.64717	2.96821	1.80897	3.25639	0.60746	1.34188	1.88831
K02424	ABC Transporters, Prokaryotic Type;Phosphate and amino acid transporters Cystine transporter [MD:M00234] [OT];fliY; cystine transport system substrate-binding protein	2.05032	3.98589	1.80897	1.53242	1.21492	1.87863	2.36038
K02072	ABC Transporters, Prokaryotic Type;Phosphate and amino acid transporters D-Methionine transporter [MD:M00238] [OT];metI; D-methionine transport system permease protein	3.72053	2.03535	4.87031	3.83105	7.28952	3.87655	3.30454
K02071	ABC Transporters, Prokaryotic Type;Phosphate and amino acid transporters D-Methionine transporter [MD:M00238] [OT];metN; D-methionine transport system ATP-binding protein	5.29858	2.7986	7.23589	6.32123	3.0373	4.74132	6.60907
K02073	ABC Transporters, Prokaryotic Type;Phosphate and amino acid transporters D-Methionine transporter [MD:M00238] [OT];metQ; D-methionine transport system substrate-binding protein	6.32374	5.76682	7.23589	9.96073	5.46714	8.76696	7.08115
K09969	ABC Transporters, Prokaryotic Type;Phosphate and amino acid transporters General L-amino acid transporter [MD:M00232] [OT];aapJ, bztA; general L-amino acid transport system substrate-binding protein	2.14247	0.0848061	1.53067	2.68174	3.0373	2.26629	0
K09971	ABC Transporters, Prokaryotic Type;Phosphate and amino acid transporters General L-amino acid transporter [MD:M00232] [OT];aapM, bztC; general L-amino acid transport system permease protein	2.15399	0	2.36558	2.49018	1.21492	1.25242	0
K09972	ABC Transporters, Prokaryotic Type;Phosphate and amino acid transporters General L-amino acid transporter [MD:M00232] [OT];aapP, bztD; general L-amino acid transport system ATP-binding protein [EC:3.6.3.-]	2.11943	0	1.94812	3.6395	0	2.08737	0
K09970	ABC Transporters, Prokaryotic Type;Phosphate and amino acid transporters General L-amino acid transporter [MD:M00232] [OT];aapQ, bztB; general L-amino acid transport system permease protein	2.31525	0.0848061	1.66982	3.83105	0.60746	2.02773	0
K10008	ABC Transporters, Prokaryotic Type;Phosphate and amino acid transporters Glutamate transporter [MD:M00233] [OT];gluA; glutamate transport system ATP-binding protein [EC:3.6.3.-]	0	0.0848061	0	0	0	0	0
K10006	ABC Transporters, Prokaryotic Type;Phosphate and amino acid transporters Glutamate transporter [MD:M00233] [OT];gluC; glutamate transport system permease protein	0	0.0848061	0	0	0	0	0
K10007	ABC Transporters, Prokaryotic Type;Phosphate and amino acid transporters Glutamate transporter [MD:M00233] [OT];gluD; glutamate transport system permease protein	0	0.0848061	0	0	0	0	0
K10001	ABC Transporters, Prokaryotic Type;Phosphate and amino acid transporters Glutamate/aspartate transporter [MD:M00230] [OT];gltI, aatJ; glutamate/aspartate transport system substrate-binding protein	1.94665	5.76682	2.64388	4.0226	3.0373	0.298196	1.88831
K10003	ABC Transporters, Prokaryotic Type;Phosphate and amino acid transporters Glutamate/aspartate transporter [MD:M00230] [OT];gltJ, aatQ; glutamate/aspartate transport system permease protein	1.81995	0.763255	1.94812	1.91553	1.21492	0.298196	2.36038
K10002	ABC Transporters, Prokaryotic Type;Phosphate and amino acid transporters Glutamate/aspartate transporter [MD:M00230] [OT];gltK, aatM; glutamate/aspartate transport system permease protein	1.42831	1.4417	1.66982	2.49018	1.21492	0.357835	1.88831
K10004	ABC Transporters, Prokaryotic Type;Phosphate and amino acid transporters Glutamate/aspartate transporter [MD:M00230] [OT];gltL, aatP; glutamate/aspartate transport system ATP-binding protein [EC:3.6.3.-]	1.81995	3.13783	2.78303	2.68174	1.82238	0.357835	2.36038
K10036	ABC Transporters, Prokaryotic Type;Phosphate and amino acid transporters Glutamine transporter [MD:M00227] [OT];glnH; glutamine transport system substrate-binding protein	2.48803	0.848061	2.78303	1.53242	0.60746	0.71567	2.36038
K10037	ABC Transporters, Prokaryotic Type;Phosphate and amino acid transporters Glutamine transporter [MD:M00227] [OT];glnP; glutamine transport system permease protein	1.58957	0.424031	2.78303	2.29863	2.42984	1.01387	1.41623
K10038	ABC Transporters, Prokaryotic Type;Phosphate and amino acid transporters Glutamine transporter [MD:M00227] [OT];glnQ; glutamine transport system ATP-binding protein [EC:3.6.3.-]	2.21158	0.593643	2.78303	2.68174	1.82238	0.566572	1.41623
K10014	ABC Transporters, Prokaryotic Type;Phosphate and amino acid transporters Histidine transporter [MD:M00226] [OT];hisJ; histidine transport system substrate-binding protein	1.90058	4.66434	1.66982	2.68174	3.64476	1.49098	3.30454
K10015	ABC Transporters, Prokaryotic Type;Phosphate and amino acid transporters Histidine transporter [MD:M00226] [OT];hisM; histidine transport system permease protein	1.83147	2.96821	0.83491	3.06484	3.0373	1.819	1.41623
K10017	ABC Transporters, Prokaryotic Type;Phosphate and amino acid transporters Histidine transporter [MD:M00226] [OT];hisP; histidine transport system ATP-binding protein [EC:3.6.3.21]	2.00425	4.24031	2.22643	2.29863	0.60746	1.90845	1.88831
K10016	ABC Transporters, Prokaryotic Type;Phosphate and amino acid transporters Histidine transporter [MD:M00226] [OT];hisQ; histidine transport system permease protein	1.60109	2.88341	1.39152	1.34087	0	1.61026	1.41623
K16957	ABC Transporters, Prokaryotic Type;Phosphate and amino acid transporters L-Cystine transporter [MD:M00585] [OT];tcyK; L-cystine transport system substrate-binding protein	0.898455	0	0.974062	0.957763	0.60746	0	0
K16958	ABC Transporters, Prokaryotic Type;Phosphate and amino acid transporters L-Cystine transporter [MD:M00585] [OT];tcyL; L-cystine transport system permease protein	0.829343	0	0	2.10708	0	0	0
K16959	ABC Transporters, Prokaryotic Type;Phosphate and amino acid transporters L-Cystine transporter [MD:M00585] [OT];tcyM; L-cystine transport system permease protein	0.933011	0	0.556607	0.957763	0	0	0
K16960	ABC Transporters, Prokaryotic Type;Phosphate and amino acid transporters L-Cystine transporter [MD:M00585] [OT];tcyN; L-cystine transport system ATP-binding protein [EC:3.6.3.-]	0.898455	0	0.974062	0	1.82238	0	0
K10013	ABC Transporters, Prokaryotic Type;Phosphate and amino acid transporters Lysine/arginine/ornithine transporter [MD:M00225];ABC.ARG.S, argT; lysine/arginine/ornithine transport system substrate-binding protein	5.41377	7.63255	5.98352	2.87329	3.64476	0.0894588	2.83246
K10015	ABC Transporters, Prokaryotic Type;Phosphate and amino acid transporters Lysine/arginine/ornithine transporter [MD:M00225];hisM; histidine transport system permease protein	1.83147	2.96821	0.83491	3.06484	3.0373	1.819	1.41623
K10017	ABC Transporters, Prokaryotic Type;Phosphate and amino acid transporters Lysine/arginine/ornithine transporter [MD:M00225];hisP; histidine transport system ATP-binding protein [EC:3.6.3.21]	2.00425	4.24031	2.22643	2.29863	0.60746	1.90845	1.88831
K10016	ABC Transporters, Prokaryotic Type;Phosphate and amino acid transporters Lysine/arginine/ornithine transporter [MD:M00225];hisQ; histidine transport system permease protein	1.60109	2.88341	1.39152	1.34087	0	1.61026	1.41623
K10019	ABC Transporters, Prokaryotic Type;Phosphate and amino acid transporters Octopine/nopaline transporter [MD:M00231];occM, nocM; octopine/nopaline transport system permease protein	1.75084	0.593643	0	0.191553	0.60746	0.178918	0
K10021	ABC Transporters, Prokaryotic Type;Phosphate and amino acid transporters Octopine/nopaline transporter [MD:M00231];occP, nocP; octopine/nopaline transport system ATP-binding protein [EC:3.6.3.-]	2.24614	0.424031	0.83491	0.191553	1.21492	0.0894588	0
K10020	ABC Transporters, Prokaryotic Type;Phosphate and amino acid transporters Octopine/nopaline transporter [MD:M00231];occQ, nocQ; octopine/nopaline transport system permease protein	1.81995	0.593643	0	0.191553	0	0.208737	0
K10018	ABC Transporters, Prokaryotic Type;Phosphate and amino acid transporters Octopine/nopaline transporter [MD:M00231];occT, nocT; octopine/nopaline transport system substrate-binding protein	2.14247	0.848061	0.278303	0	0	0.208737	0
K02038	ABC Transporters, Prokaryotic Type;Phosphate and amino acid transporters Phosphate transporter [MD:M00222] [OT];pstA; phosphate transport system permease protein	6.51956	1.4417	1.94812	7.47055	1.82238	5.54644	4.72077
K02036	ABC Transporters, Prokaryotic Type;Phosphate and amino acid transporters Phosphate transporter [MD:M00222] [OT];pstB; phosphate transport system ATP-binding protein [EC:3.6.3.27]	4.18127	1.78093	2.36558	4.0226	0.60746	4.14492	3.30454
K02037	ABC Transporters, Prokaryotic Type;Phosphate and amino acid transporters Phosphate transporter [MD:M00222] [OT];pstC; phosphate transport system permease protein	6.73841	1.69612	2.08728	8.23676	3.0373	6.91815	4.24869
K02040	ABC Transporters, Prokaryotic Type;Phosphate and amino acid transporters Phosphate transporter [MD:M00222] [OT];pstS; phosphate transport system substrate-binding protein	5.03365	3.22263	1.66982	6.12968	3.64476	7.24616	4.24869
K02041	ABC Transporters, Prokaryotic Type;Phosphate and amino acid transporters Phosphonate transporter [MD:M00223] [OT];phnC; phosphonate transport system ATP-binding protein [EC:3.6.3.28]	1.58957	0.339225	1.80897	0	0	2.20665	1.88831
K02044	ABC Transporters, Prokaryotic Type;Phosphate and amino acid transporters Phosphonate transporter [MD:M00223] [OT];phnD; phosphonate transport system substrate-binding protein	2.39588	0.169612	1.94812	0	0	2.20665	1.41623
K02042	ABC Transporters, Prokaryotic Type;Phosphate and amino acid transporters Phosphonate transporter [MD:M00223] [OT];phnE; phosphonate transport system permease protein	4.16975	0.0848061	1.53067	0	0	3.07142	3.30454
K16961	ABC Transporters, Prokaryotic Type;Phosphate and amino acid transporters Putative amino-acid transporter [MD:M00586] [OT];yxeM; putative amino-acid transport system substrate-binding protein	0.230373	0	0	0	0	0	0.944153
K16962	ABC Transporters, Prokaryotic Type;Phosphate and amino acid transporters Putative amino-acid transporter [MD:M00586] [OT];yxeN; putative amino-acid transport system permease protein	0.230373	0	0	0	0	0	0
K16963	ABC Transporters, Prokaryotic Type;Phosphate and amino acid transporters Putative amino-acid transporter [MD:M00586] [OT];yxeO; putative amino-acid transport system ATP-binding protein [EC:3.6.3.-]	0.218854	0	0	0	0	0	0
K02028	ABC Transporters, Prokaryotic Type;Phosphate and amino acid transporters Putative polar amino acid transporter [MD:M00236];ABC.PA.A; polar amino acid transport system ATP-binding protein [EC:3.6.3.21]	10.482	6.36046	6.95759	12.4509	7.89697	10.1088	6.137
K02029	ABC Transporters, Prokaryotic Type;Phosphate and amino acid transporters Putative polar amino acid transporter [MD:M00236];ABC.PA.P; polar amino acid transport system permease protein	16.0916	17.1308	12.6628	16.8566	35.8401	22.3647	12.274
K02030	ABC Transporters, Prokaryotic Type;Phosphate and amino acid transporters Putative polar amino acid transporter [MD:M00236];ABC.PA.S; polar amino acid transport system substrate-binding protein	15.8497	19.4206	12.3845	8.42831	30.9804	29.2232	18.8831
K11959	ABC Transporters, Prokaryotic Type;Phosphate and amino acid transporters Urea transporter [MD:M00323] [OT];urtA; urea transport system substrate-binding protein	2.74144	3.22263	1.53067	0.76621	0	4.1151	2.83246
K11960	ABC Transporters, Prokaryotic Type;Phosphate and amino acid transporters Urea transporter [MD:M00323] [OT];urtB; urea transport system permease protein	3.74356	3.39225	1.94812	1.14932	0	3.16088	1.88831
K11961	ABC Transporters, Prokaryotic Type;Phosphate and amino acid transporters Urea transporter [MD:M00323] [OT];urtC; urea transport system permease protein	2.72992	3.22263	1.80897	0.76621	0	2.86268	1.41623
K11962	ABC Transporters, Prokaryotic Type;Phosphate and amino acid transporters Urea transporter [MD:M00323] [OT];urtD; urea transport system ATP-binding protein	2.4074	2.7138	1.11321	0.76621	0	2.95214	1.41623
K11963	ABC Transporters, Prokaryotic Type;Phosphate and amino acid transporters Urea transporter [MD:M00323] [OT];urtE; urea transport system ATP-binding protein	1.87754	1.95054	0.974062	0.383105	0	2.92232	1.88831
K10558	ABC Transporters, Prokaryotic Type;Saccharide, polyol, and lipid transporters AI-2 transporter [MD:M00219] [OT];lsrA, ego; AI-2 transport system ATP-binding protein	0.0230373	0	1.80897	0	1.21492	0	0
K10555	ABC Transporters, Prokaryotic Type;Saccharide, polyol, and lipid transporters AI-2 transporter [MD:M00219] [OT];lsrB; AI-2 transport system substrate-binding protein	0.034556	0	1.11321	0	0.60746	0	0
K10556	ABC Transporters, Prokaryotic Type;Saccharide, polyol, and lipid transporters AI-2 transporter [MD:M00219] [OT];lsrC; AI-2 transport system permease protein	0.0230373	0	1.39152	0	0	0	1.41623
K10557	ABC Transporters, Prokaryotic Type;Saccharide, polyol, and lipid transporters AI-2 transporter [MD:M00219] [OT];lsrD; AI-2 transport system permease protein	0.0230373	0	1.66982	0	0.60746	0	0
K10235	ABC Transporters, Prokaryotic Type;Saccharide, polyol, and lipid transporters alpha-Glucoside transporter [MD:M00201] [OT];aglK; alpha-glucoside transport system ATP-binding protein	0	0	0	0	0	0.0894588	0
K10112	ABC Transporters, Prokaryotic Type;Saccharide, polyol, and lipid transporters alpha-Glucoside transporter [MD:M00201] [OT];msmX, msmK, malK, sugC, ggtA, msiK; multiple sugar transport system ATP-binding protein	1.15187	3.22263	1.94812	0	1.21492	1.13314	2.36038
K15770	ABC Transporters, Prokaryotic Type;Saccharide, polyol, and lipid transporters Arabinogalactan oligomer/maltooligosaccharide transport system [MD:M00491] [OT];cycB, ganO; arabinogalactan oligomer / maltooligosaccharide transport system substrate-binding protein	0.875418	0	0.974062	0	1.21492	0	0
K15771	ABC Transporters, Prokaryotic Type;Saccharide, polyol, and lipid transporters Arabinogalactan oligomer/maltooligosaccharide transport system [MD:M00491] [OT];ganP; arabinogalactan oligomer / maltooligosaccharide transport system permease protein	0.633526	0	1.53067	0	1.21492	0	0
K15772	ABC Transporters, Prokaryotic Type;Saccharide, polyol, and lipid transporters Arabinogalactan oligomer/maltooligosaccharide transport system [MD:M00491] [OT];ganQ; arabinogalactan oligomer / maltooligosaccharide transport system permease protein	0.575933	0	0.278303	0	0.60746	0	0
K10111	ABC Transporters, Prokaryotic Type;Saccharide, polyol, and lipid transporters Arabinogalactan oligomer/maltooligosaccharide transport system [MD:M00491] [OT];malK, mtlK, thuK; multiple sugar transport system ATP-binding protein [EC:3.6.3.-]	5.29858	4.91876	2.50473	1.14932	6.0746	2.8925	1.41623
K10112	ABC Transporters, Prokaryotic Type;Saccharide, polyol, and lipid transporters Arabinogalactan oligomer/maltooligosaccharide transport system [MD:M00491] [OT];msmX, msmK, malK, sugC, ggtA, msiK; multiple sugar transport system ATP-binding protein	1.15187	3.22263	1.94812	0	1.21492	1.13314	2.36038
K10112	ABC Transporters, Prokaryotic Type;Saccharide, polyol, and lipid transporters Arabinosaccharide transporter [MD:M00602] [OT];msmX, msmK, malK, sugC, ggtA, msiK; multiple sugar transport system ATP-binding protein	1.15187	3.22263	1.94812	0	1.21492	1.13314	2.36038
K10112	ABC Transporters, Prokaryotic Type;Saccharide, polyol, and lipid transporters Cellobiose transporter [MD:M00206] [OT];msmX, msmK, malK, sugC, ggtA, msiK; multiple sugar transport system ATP-binding protein	1.15187	3.22263	1.94812	0	1.21492	1.13314	2.36038
K10551	ABC Transporters, Prokaryotic Type;Saccharide, polyol, and lipid transporters D-Allose transporter [MD:M00217] [OT];alsA; D-allose transport system ATP-binding protein [EC:3.6.3.17]	0	0	0.278303	0	0	0	0
K10549	ABC Transporters, Prokaryotic Type;Saccharide, polyol, and lipid transporters D-Allose transporter [MD:M00217] [OT];alsB; D-allose transport system substrate-binding protein	0	0	0.139152	0	0	0	0
K10550	ABC Transporters, Prokaryotic Type;Saccharide, polyol, and lipid transporters D-Allose transporter [MD:M00217] [OT];alsC; D-allose transport system permease protein	0	0	0.139152	0	0	0	0
K10543	ABC Transporters, Prokaryotic Type;Saccharide, polyol, and lipid transporters D-Xylose transporter [MD:M00215] [OT];xylF; D-xylose transport system substrate-binding protein	2.68385	2.45938	2.64388	0.191553	4.25222	2.20665	0
K10545	ABC Transporters, Prokaryotic Type;Saccharide, polyol, and lipid transporters D-Xylose transporter [MD:M00215] [OT];xylG; D-xylose transport system ATP-binding protein [EC:3.6.3.17]	3.2137	3.64666	3.06134	0	7.28952	3.63799	0.472077
K10544	ABC Transporters, Prokaryotic Type;Saccharide, polyol, and lipid transporters D-Xylose transporter [MD:M00215] [OT];xylH; D-xylose transport system permease protein	2.47651	3.47705	2.50473	0.383105	2.42984	3.13106	0.472077
K17204	ABC Transporters, Prokaryotic Type;Saccharide, polyol, and lipid transporters Erythritol transporter [MD:M00590] [OT];eryE; erythritol transport system ATP-binding protein	4.29646	0.593643	0.974062	1.53242	2.42984	0	1.88831
K17202	ABC Transporters, Prokaryotic Type;Saccharide, polyol, and lipid transporters Erythritol transporter [MD:M00590] [OT];K17202, eryG; erythritol transport system substrate-binding protein	2.9027	0.169612	0.556607	1.53242	1.21492	0	0.944153
K17203	ABC Transporters, Prokaryotic Type;Saccharide, polyol, and lipid transporters Erythritol transporter [MD:M00590] [OT];K17203, eryF; erythritol transport system permease protein	2.99485	1.10248	0.556607	1.91553	1.82238	0	0.944153
K10554	ABC Transporters, Prokaryotic Type;Saccharide, polyol, and lipid transporters Fructose transporter [MD:M00218] [OT];frcA; fructose transport system ATP-binding protein	0	0.0848061	0	0	0	1.64008	0
K10552	ABC Transporters, Prokaryotic Type;Saccharide, polyol, and lipid transporters Fructose transporter [MD:M00218] [OT];frcB; fructose transport system substrate-binding protein	1.3592	0.169612	0	0	0	1.28224	0
K10553	ABC Transporters, Prokaryotic Type;Saccharide, polyol, and lipid transporters Fructose transporter [MD:M00218] [OT];frcC; fructose transport system permease protein	0	0.0848061	0	0	0	1.93827	0
K18480	ABC Transporters, Prokaryotic Type;Saccharide, polyol, and lipid transporters gamma-Hexachlorocyclohexane transporter [MD:M00669];linN; cholesterol transport system auxiliary component	0	1.4417	0	0	0	0.387655	0
K02067	ABC Transporters, Prokaryotic Type;Saccharide, polyol, and lipid transporters gamma-Hexachlorocyclohexane transporter [MD:M00669];mlaD, linM; phospholipid/cholesterol/gamma-HCH transport system substrate-binding protein	1.57806	2.12015	2.08728	1.72397	0	1.819	1.41623
K02066	ABC Transporters, Prokaryotic Type;Saccharide, polyol, and lipid transporters gamma-Hexachlorocyclohexane transporter [MD:M00669];mlaE, linK; phospholipid/cholesterol/gamma-HCH transport system permease protein	2.07336	2.7986	1.39152	2.49018	2.42984	2.14701	1.41623
K02065	ABC Transporters, Prokaryotic Type;Saccharide, polyol, and lipid transporters gamma-Hexachlorocyclohexane transporter [MD:M00669];mlaF, linL, mkl; phospholipid/cholesterol/gamma-HCH transport system ATP-binding protein	1.92362	2.7986	1.80897	2.87329	0.60746	2.5943	1.41623
K17315	ABC Transporters, Prokaryotic Type;Saccharide, polyol, and lipid transporters Glucose/mannose transporter [MD:M00605] [OT];gtsA, glcE; glucose/mannose transport system substrate-binding protein	0	2.20496	0	0	0	1.58044	0
K17316	ABC Transporters, Prokaryotic Type;Saccharide, polyol, and lipid transporters Glucose/mannose transporter [MD:M00605] [OT];gtsB, glcF; glucose/mannose transport system permease protein	0	1.01767	0	0	0	1.16296	0
K17317	ABC Transporters, Prokaryotic Type;Saccharide, polyol, and lipid transporters Glucose/mannose transporter [MD:M00605] [OT];gtsC, glcG; glucose/mannose transport system permease protein	0	1.78093	0	0	0	1.10332	0
K10112	ABC Transporters, Prokaryotic Type;Saccharide, polyol, and lipid transporters Glucose/mannose transporter [MD:M00605] [OT];msmX, msmK, malK, sugC, ggtA, msiK; multiple sugar transport system ATP-binding protein	1.15187	3.22263	1.94812	0	1.21492	1.13314	2.36038
K17323	ABC Transporters, Prokaryotic Type;Saccharide, polyol, and lipid transporters Glycerol transporter [MD:M00607] [OT];glpQ; glycerol transport system permease protein	0	0.254418	0	0	0	0.387655	0
K17324	ABC Transporters, Prokaryotic Type;Saccharide, polyol, and lipid transporters Glycerol transporter [MD:M00607] [OT];glpS; glycerol transport system ATP-binding protein	0	0.0848061	0	0	0	0.298196	0
K17321	ABC Transporters, Prokaryotic Type;Saccharide, polyol, and lipid transporters Glycerol transporter [MD:M00607] [OT];glpV; glycerol transport system substrate-binding protein	0	0.169612	0	0	0	0.536753	0
K17322	ABC Transporters, Prokaryotic Type;Saccharide, polyol, and lipid transporters Glycerol transporter [MD:M00607] [OT];K17322, glpP; glycerol transport system permease protein	0	0.339225	0	0	0	0.417474	0
K17325	ABC Transporters, Prokaryotic Type;Saccharide, polyol, and lipid transporters Glycerol transporter [MD:M00607] [OT];K17325, glpT; glycerol transport system ATP-binding protein	0	0.169612	0	0	0	0.149098	0
K17210	ABC Transporters, Prokaryotic Type;Saccharide, polyol, and lipid transporters Inositol transporter [MD:M00592] [OT];iatA; inositol transport system ATP-binding protein	0	0	1.66982	0	0	0	0
K17209	ABC Transporters, Prokaryotic Type;Saccharide, polyol, and lipid transporters Inositol transporter [MD:M00592] [OT];iatP; inositol transport system permease protein	0	0	1.39152	0	0	0	0
K17208	ABC Transporters, Prokaryotic Type;Saccharide, polyol, and lipid transporters Inositol transporter [MD:M00592] [OT];K17208, ibpA; inositol transport system substrate-binding protein	0	0	1.25237	0	0	0	0
[truncated: 5,208 more rows]
