# Supplementary material for: Metagenomics reveals diet-specific specialization of bacterial communities in fungus gardens of grass- and dicot-cutter ants
Source: bioRxiv or medRxiv preprint supplement (doi:10.1101/250993), 2019-08-13

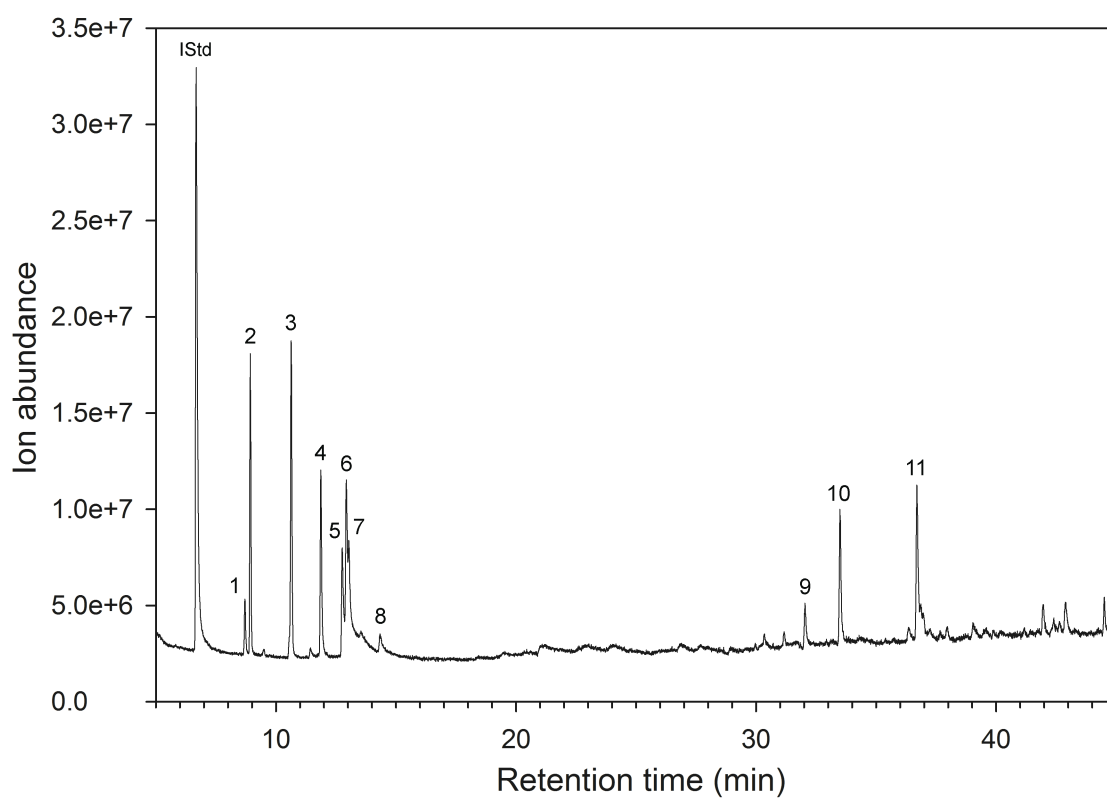

Supplement: Supplementary file [file 250993-5.pdf]
