# Supplementary material for: Metagenomics reveals diet-specific specialization of bacterial communities in fungus gardens of grass- and dicot-cutter ants
Source: bioRxiv or medRxiv preprint supplement (doi:10.1101/250993), 2019-08-13

**Prokaryotic-type ABC transporters**

**Mineral and organic ion transporters**

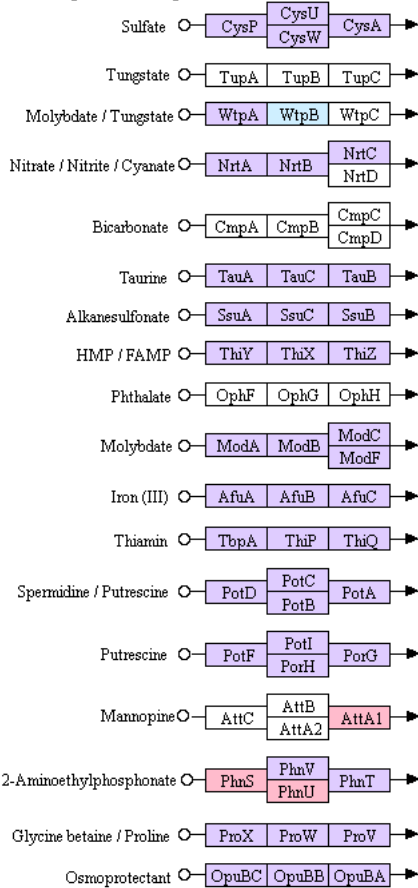

**Oligosaccharide, polyol, and lipid transporters**

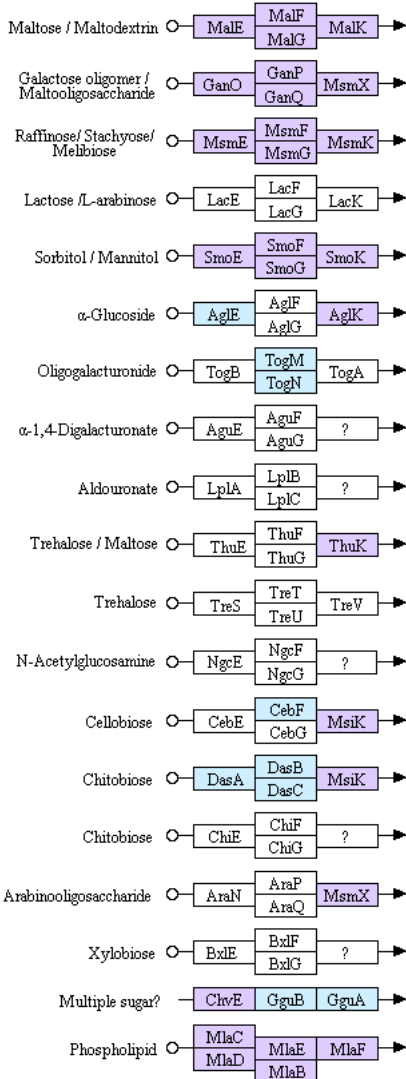

**Phosphate and amino acid transporters**

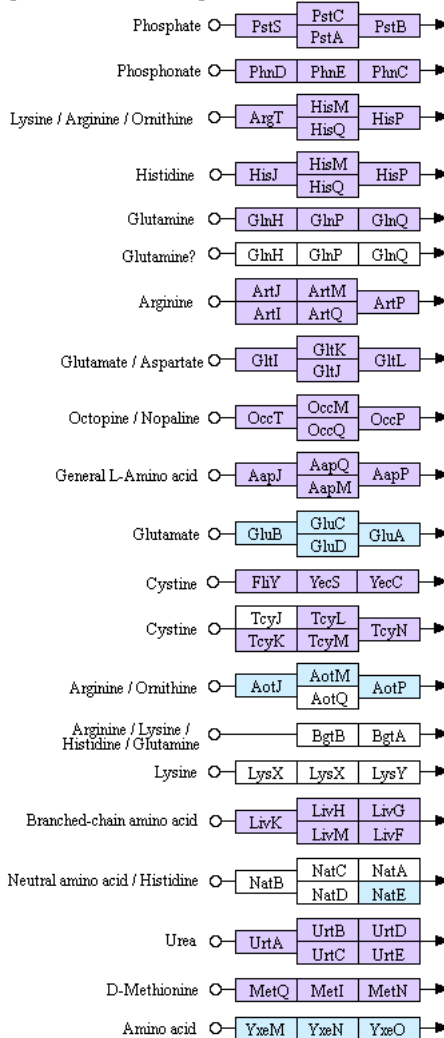

**Peptide and nickel transporters**

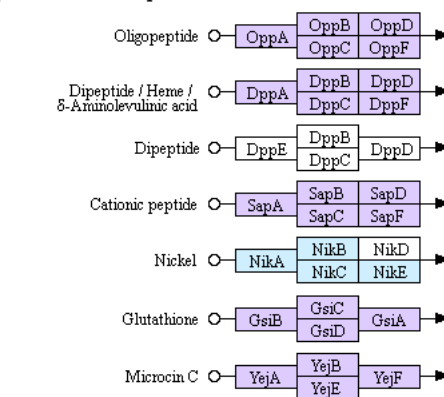

**Metallic cation, iron-siderophore and vitamin B12 transporters**

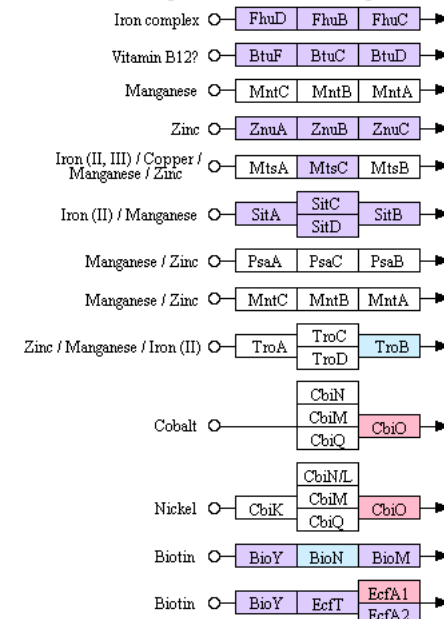

**ABC-2 and other transporters**

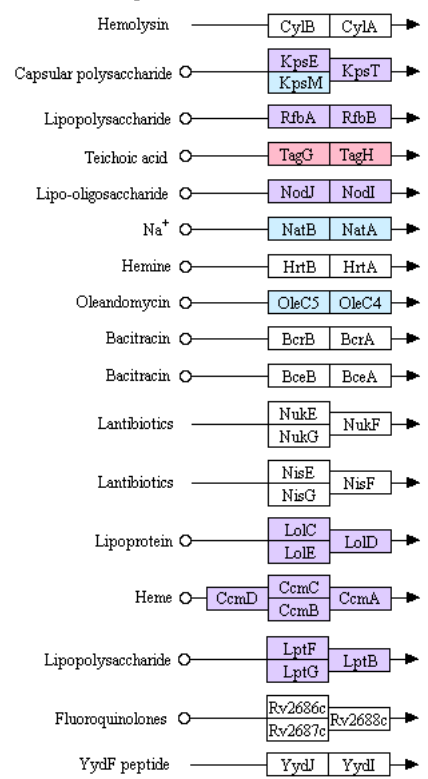

**ABC-2 -type components without transporting function**

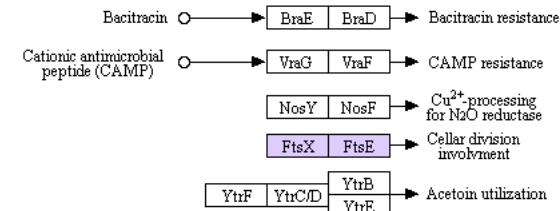

**Monosaccharide transporters**

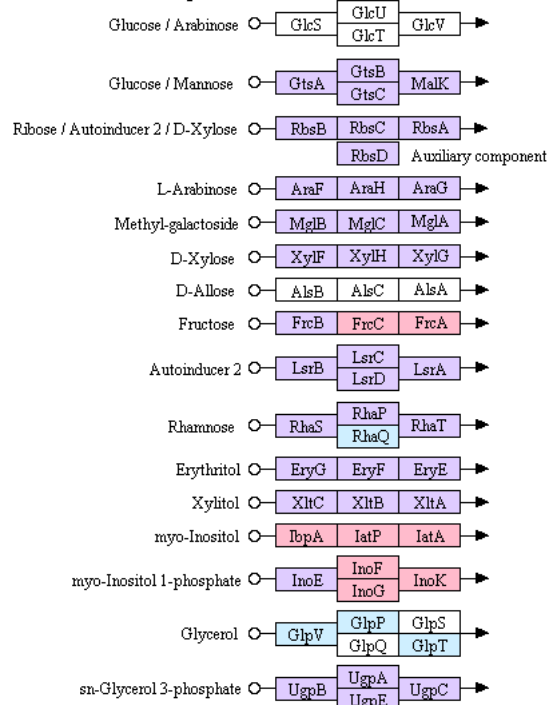

Supplement: Supplementary file [file 250993-9.pdf]
